# Supplementary material for: Aberrant cortical development is driven by impaired cell cycle and translational control in a DDX3X syndrome model
Source: eLife journal article supplement (doi:10.7554/elife.78203), 2022-05-25
Supplement: figures [file elife-78203-figures-v1.pdf]

---

## Figures and figure supplements

Aberrant cortical development is driven by impaired cell cycle and translational control in a *DDX3X* syndrome model

**Mariah L Hoye et al**

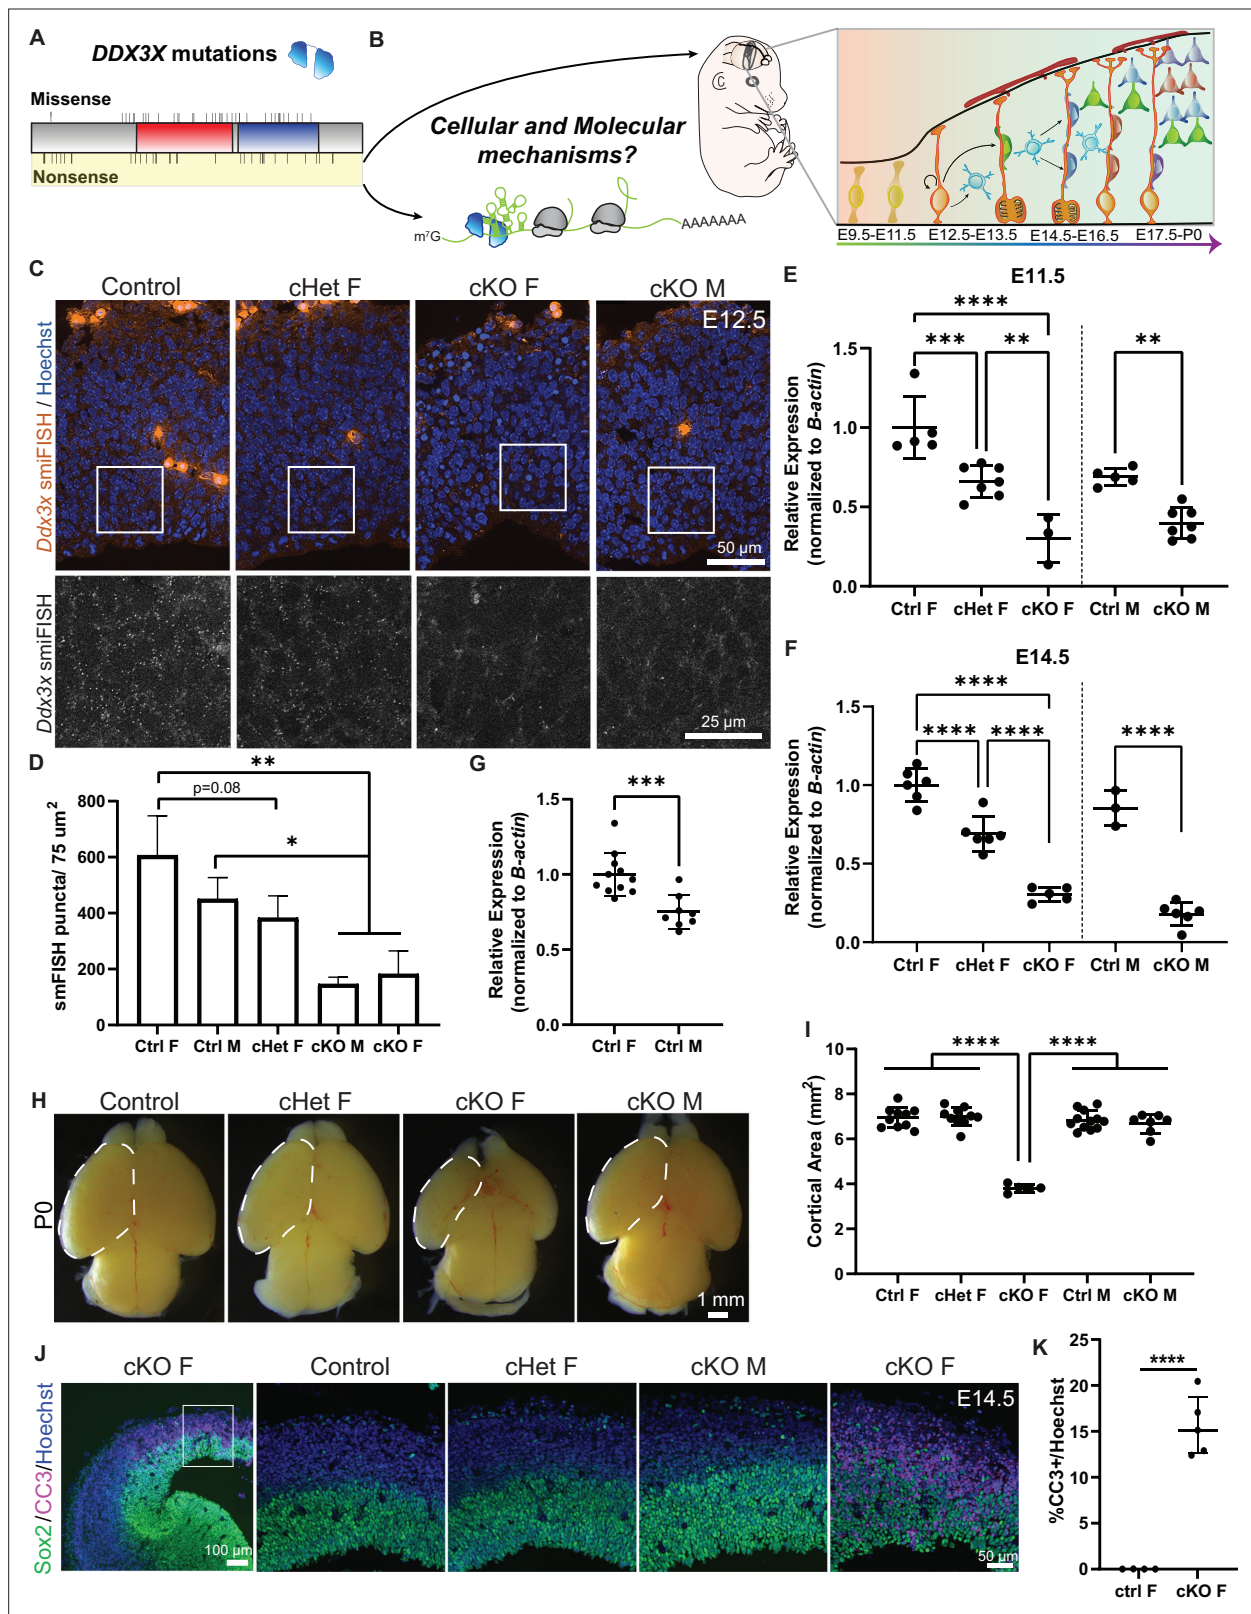

**Figure 1.** Conditional knockout of *Ddx3x* in neural progenitors using *Emx1-Cre* leads to microcephaly in female mice. (A) Schematic of *DDX3X* protein with human missense and nonsense mutations noted, along with helicase/RNA binding domains (red, blue). Nonsense mutations, highlighted in yellow, are predicted to act in a LoF manner. (B) (Left) *DDX3X* protein bound to an mRNA undergoing translation. (Right) Mouse embryo and corticogenesis showing neuroepithelial cells (light green), radial glial cells (RGCs, orange), intermediate progenitors (IPs, light blue), and neurons

Figure 1 continued on next page

## Figure 1 continued

(multi-colored); **Figure 1B** adapted from Figure 1A and B from **Hoye and Silver, 2021**. This study asks how does *Ddx3x* LoF impair mouse embryonic cortical development at a cellular and molecular level? **(C)** Representative sections of smFISH for *Ddx3x* in control, cHet female, and cKO male and female E12.5 cortices. **(D)** Quantification of *Ddx3x* smFISH signal in respective genotypes at E12.5. n=2–3 embryos/condition **(E, F)** Validation of *Ddx3x* mRNA knockdown in Tdtomato + cells from female **(F)** (control, cHet, cKO) and male **(M)** (control, cKO) brains sorted via FACS at E11.5 **(E)** and E14.5 **(F)**. n=3–7 embryos/condition. **(G)** Quantification of *Ddx3x* levels in Tdtomato + cells from control female and male brains. n=8–10 embryos/condition. **(H)** Representative whole mount images of control, cHet female, and cKO male and female brains at P0. **(I)** Quantification of cortical area at P0. n=5–12 embryos/condition. **(J)** Representative sections of E14.5 brains stained with Sox2 (green), CC3 (magenta) and Hoechst (blue) showing low-magnification on left panel, and high magnification on 4 panels to the right. **(K)** Quantification of CC3 + cells in E14.5 control and cKO female cortices. n=4–5 embryos/condition. Scale bars, indicated. Error bars, S.D. \*p<0.05, \*\*p<0.01, \*\*\*p<0.001, \*\*\*\*p<0.0001. One-way ANOVA with Tukey's **(D, E, F, I)**, Student's unpaired, two-tailed t-test **(G, K)**.

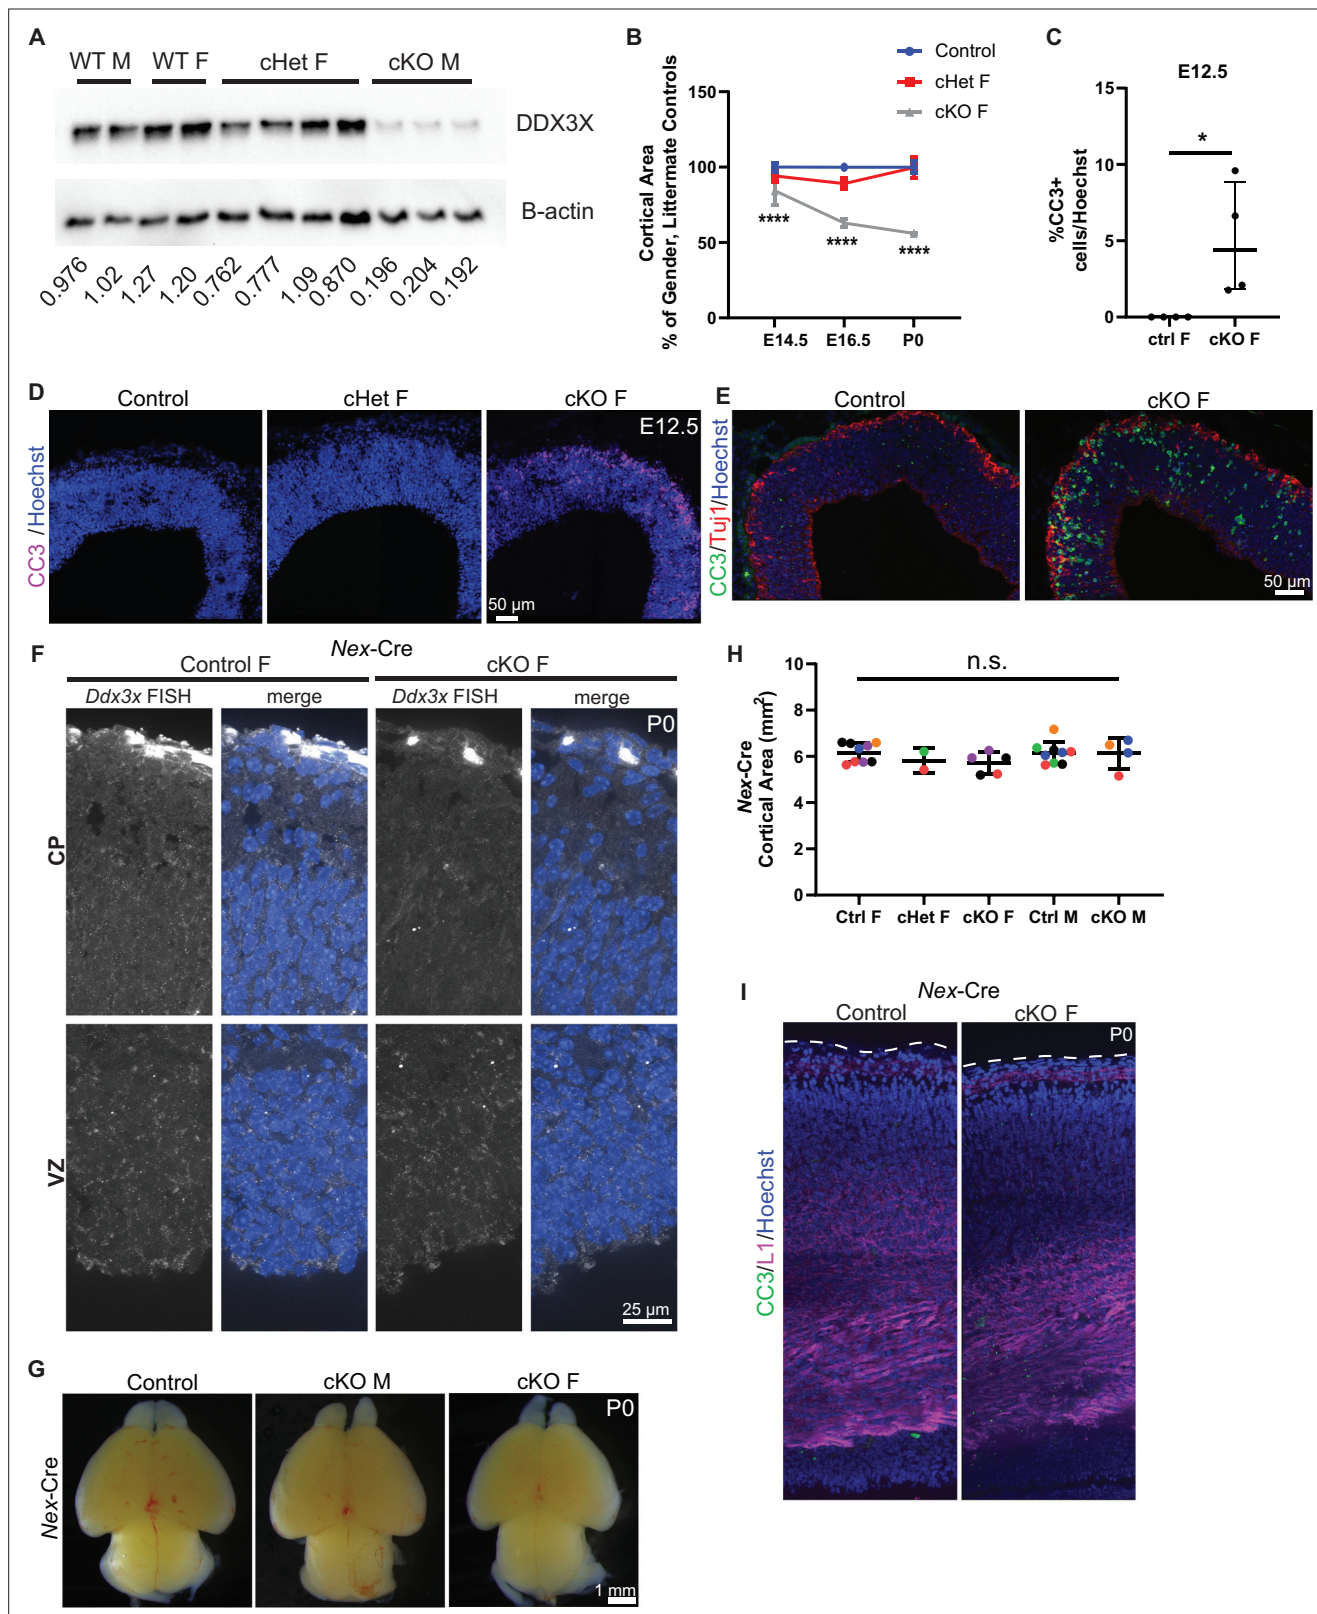

**Figure 1—figure supplement 1.** *Ddx3x* loss from neural progenitors, but not neurons leads to microcephaly and apoptosis. **(A)** Representative western blot of indicated genotypes probed for DDX3X (top) and  $\beta$ -actin loading control (bottom). Densitometric quantification of bands is shown below each lane. These data also indicate this antibody is specific to DDX3X and does not cross react with DDX3Y. *n*=2–4 embryos/condition. **(B)** Temporal quantification of cortical area in control, cHet F, and cKO F at E14.5, E16.5 and P0. *n*=3–12 embryos/condition. **(C)** Quantification of CC3 + cells in Figure 1—figure supplement 1 continued on next page

*Figure 1—figure supplement 1 continued*

control and cKO F at E12.5. n=4 embryos/condition. **(D)** Representative coronal sections from control, cHet F, and cKO F at E12.5 immunostained with CC3 (magenta) and Hoechst. **(E)** Representative coronal sections from control and cKO F at E12.5 immunostained with CC3 (green), Tuj1 (red) and Hoechst. **(F)** Representative coronal sections of smiFISH for *Ddx3x* mRNA in Nex-Cre control and cKO female cortices at P0 showing the ventricular zone (VZ) and cortical plate (CP). **(G)** Representative whole mount images of Nex-Cre control and cKO male and female brains at P0. **(H)** Quantification of Nex-Cre cortical area at P0. n=2–9 embryos/condition. **(I)** Representative coronal sections from Nex-Cre control and cKO F at P0 immunostained with CC3 (green), L1 (magenta) and Hoechst. One-way ANOVA with Tukey's **(B, H)**, Student's unpaired, two-tailed t-test **(C)**.

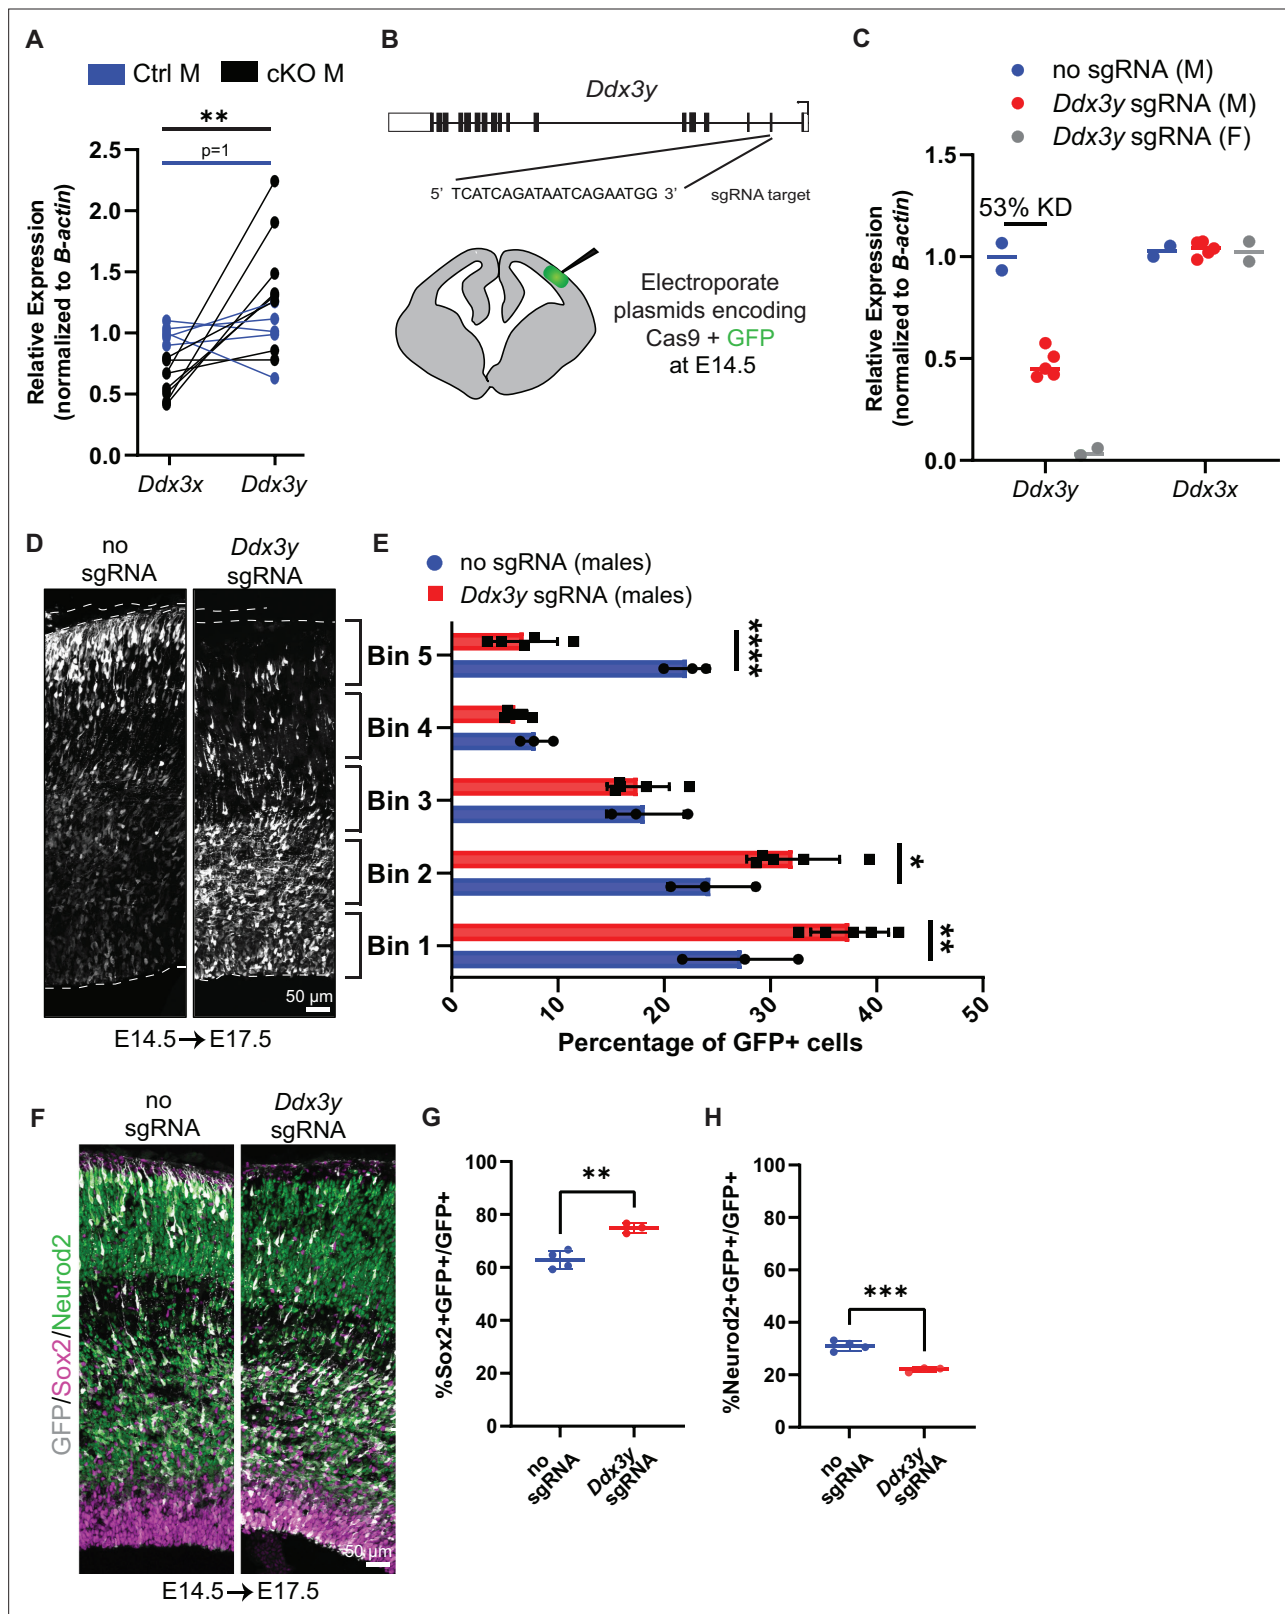

**Figure 2.** *Ddx3x* knockout is sexually dimorphic and *Ddx3y* phenocopies *Ddx3x* loss. (A) RT-qPCR quantification of *Ddx3x* and *Ddx3y* mRNA levels in FACS-isolated Tdtomato + cells from cKO male E11.5 cortices. n=5–8 embryos/condition. (B) Schematic of *Ddx3y* CRISPR sgRNA electroporation of E14.5 brain. (C) RT-qPCR quantification of *Ddx3y* and *Ddx3x* levels in GFP + FACS-isolated cells from E17.5 male and female mice electroporated with pCAG-GFP and either no sgRNA or *Ddx3y* sgRNA. n=2–5 embryos/condition. (D) Representative sections of E17.5 male brains electroporated at E14.5

Figure 2 continued on next page

*Figure 2 continued*

with pCAG-GFP and either no sgRNA or *Ddx3y* sgRNA and stained with anti-GFP (grey). Dotted lines, ventricular and pial surfaces; brackets delineate equivalently sized bins. **(E)** Quantification of distribution of GFP + cells.  $n=3-5$  embryos/condition. **(F)** Same as **(D)**, but sections were stained with anti-GFP (grey), Sox2 (magenta), and Neurod2 (green). **(G, H)** Quantification of GFP co-localization with Sox2 **(G)** or Neurod2 **(H)**.  $n=3-5$  embryos/condition. Scale bars, indicated. Error bars, S.D. \* $p<0.05$ , \*\* $p<0.01$ , \*\*\* $p<0.001$ , \*\*\*\* $p<0.0001$ . Student's paired, two-tailed t-test **(A)**, Two-way ANOVA with Sidak's **(E)**, Student's unpaired, two-tailed t-test **(G, H)**.

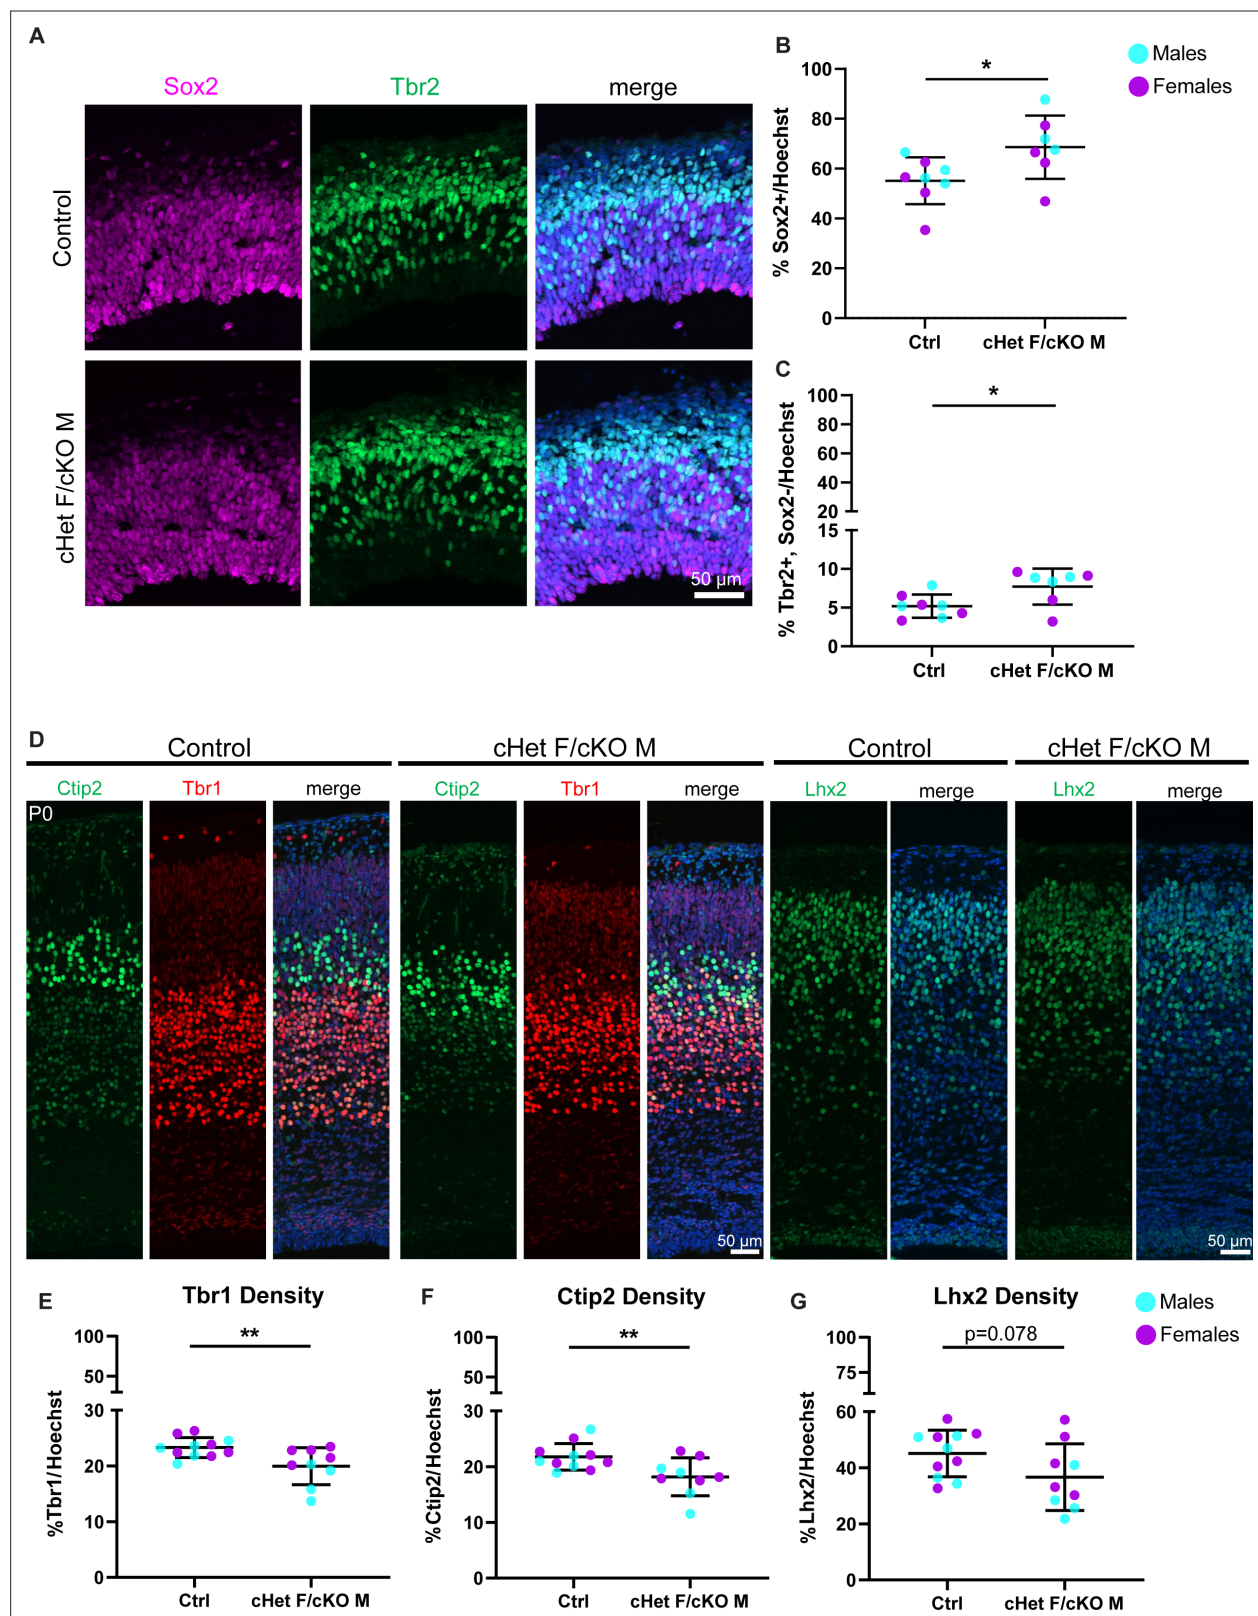

**Figure 3.** *Ddx3x* depletion leads to more RGCs and mature IPs, and fewer excitatory neurons across laminar layers. (A) Representative sections from E14.5 cortices stained with Sox2 (magenta) and Tbr2 (green) (control M and cKO M shown). (B, C) Quantification of density of Sox2+ (RGCs) (B) and Tbr2 + Sox2- (mature IPs) (C) cells relative to all cells (Hoechst) at E14.5.  $n=7-8$  embryos/condition. (D) Representative sections stained with Ctip2 (green), Tbr1 (red), and Lhx2 (green) from P0 control and cHet F/cKO M cortices (control M and cKO M shown). (E-G) Quantification of laminar marker density

Figure 3 continued on next page

*Figure 3 continued*

for Tbr1 (**E**), Ctip2 (**F**), and Lhx2 (**G**) relative to all cells (Hoechst). n=8–10 embryos/condition. Scale bars, indicated. Error bars, S.D. \*p<0.05, \*\*p<0.01. Student's unpaired, two-tailed t-test (**B**, **C**, **E–G**).

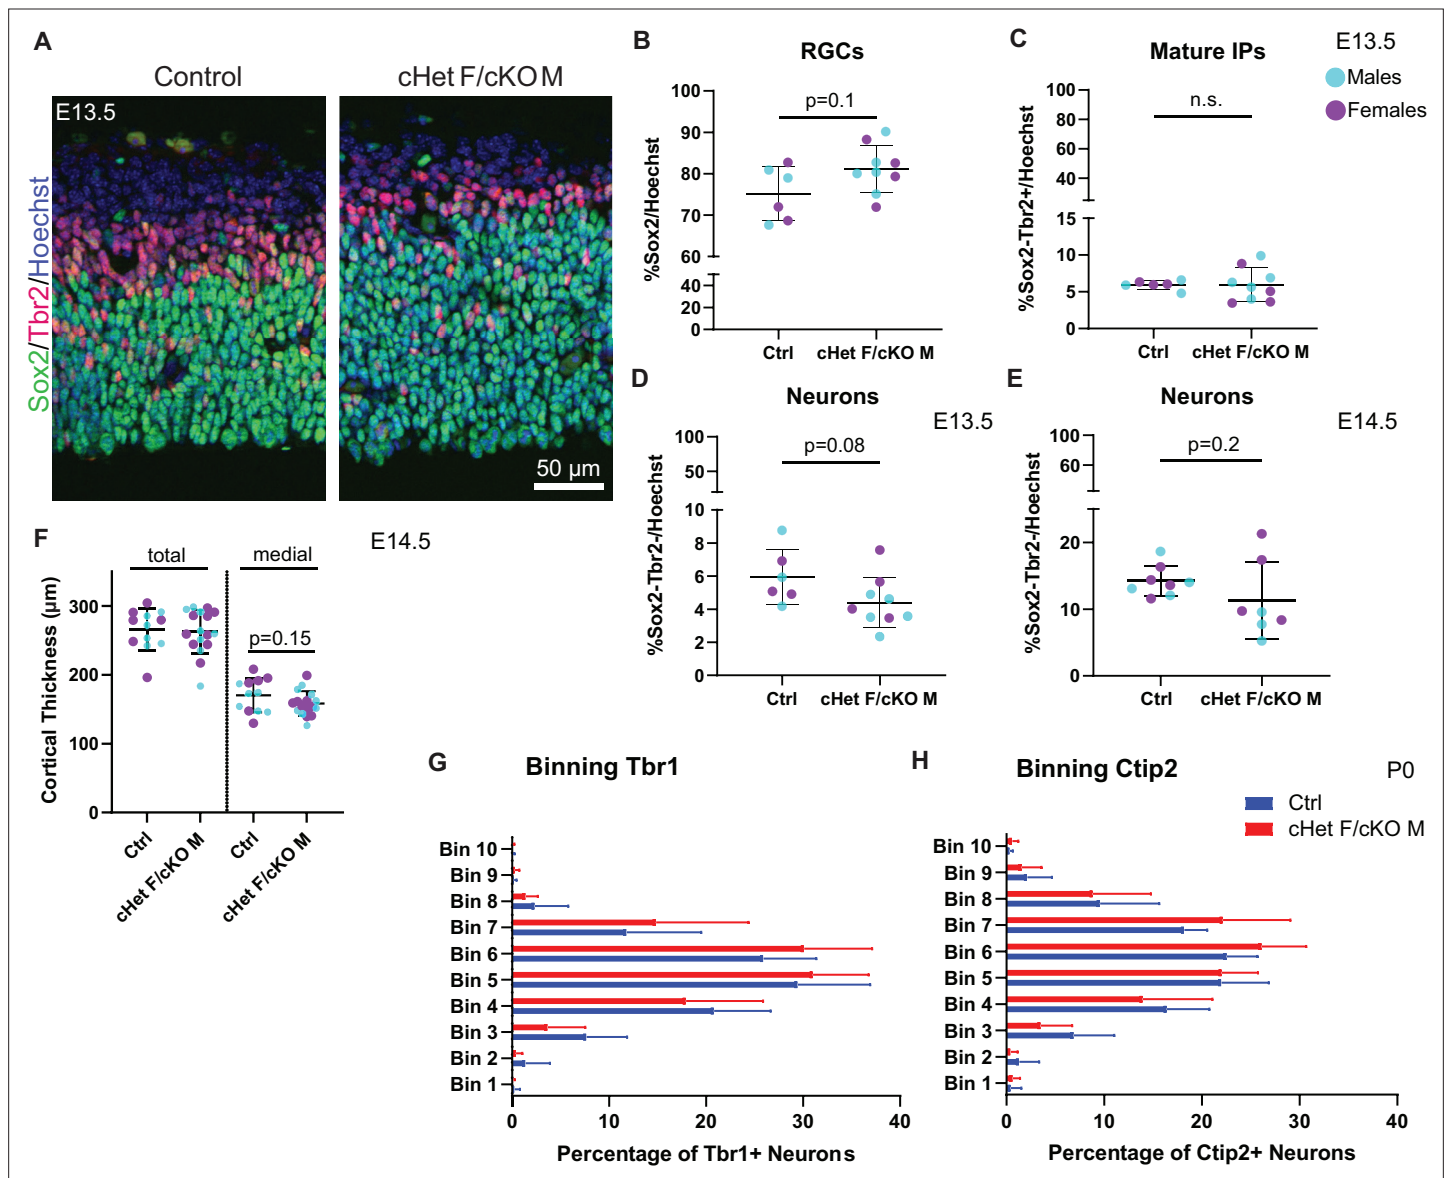

**Figure 3—figure supplement 1.** *Ddx3x* depletion leads to more progenitors and less neurons at E13.5, but does not affect cortical thickness or laminar position of neurons. (A) Representative coronal sections from control and cHet F/cKO M at E13.5 immunostained with Sox2 (green), Tbr2 (magenta) and Hoechst (control M and cKO M shown). (B–E) Quantification of RGCs (Sox2+) (B), mature IPs (Sox2-, Tbr2+) (C), putative neurons (Sox2-Tbr2-) density relative to Hoechst in control and cHet F/cKO M at E13.5 (D). n=6–9 embryos/condition. Sox2-Tbr2- density relative to Hoechst in control and cHet F/cKO M at E14.5. n=7–8 embryos/condition. (F) Quantification of cortical thickness at E14.5 in control and cHet F/cKO M measured medially and laterally (total) or just medially. n=12–17 embryos/condition. (G, H) Quantification of the distribution of Tbr1+ (G) and Ctip2+ (H) cells in control and cHet F/cKO M at P0. Student's unpaired, two-tailed t-test (B–F), Two-way ANOVA with Sidak's (G, H).

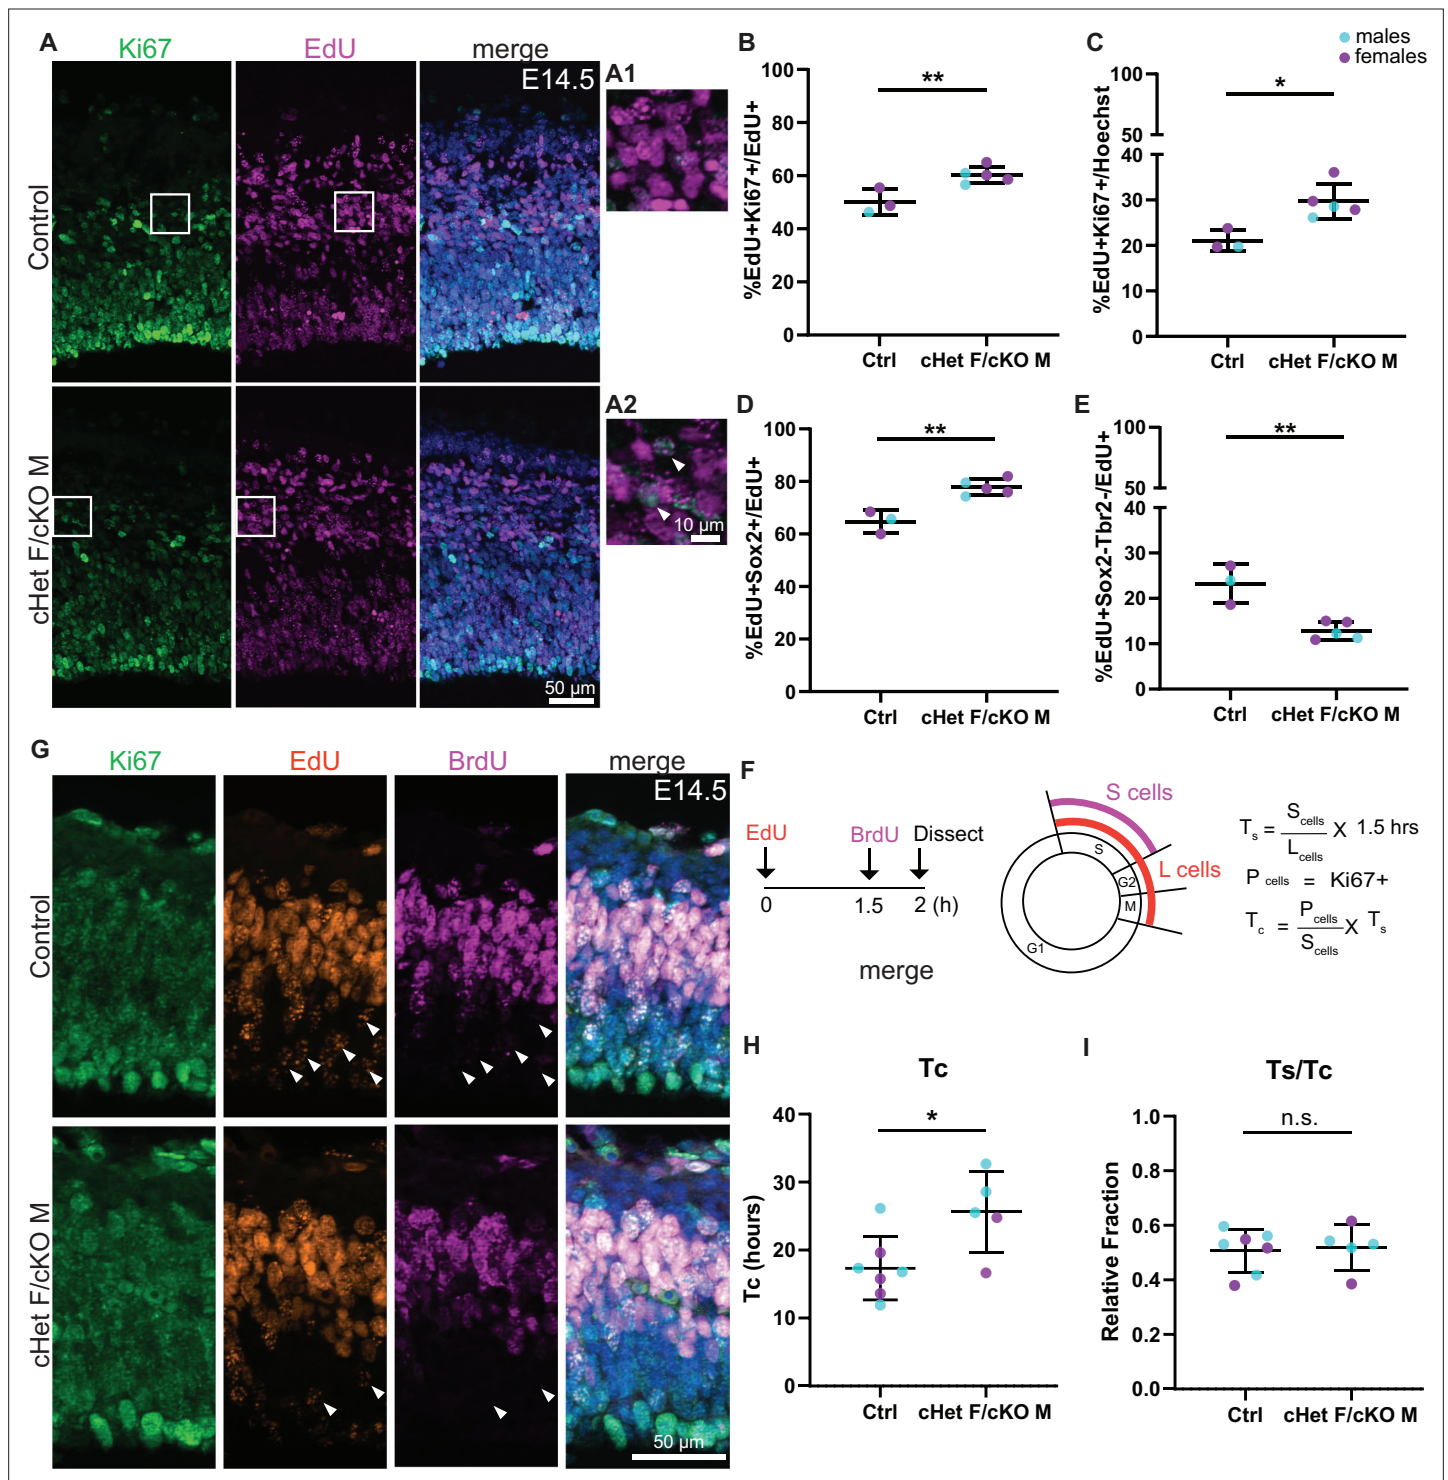

**Figure 4.** *Ddx3x* depletion impairs progenitor cell cycle exit and prolongs cell cycle duration. (A) Representative sections stained with Ki67 (green) and EdU (magenta) from E14.5 control and cHet F/cKO M mice (control F and cHet F shown) pulsed with EdU at E13.5, and higher magnification insets (A1, A2). (B, C) Quantification of Ki67 + EdU + relative to EdU + cells (B) and all cells (Hoechst, C). n=3–5 embryos/condition. (D, E) Quantification of EdU +Sox2+ (D) and EdU +Sox2-Tbr2- cells (E) relative to all EdU + cells. n=3–5 embryos/condition. (F) Schematic illustrating the semi-cumulative labeling paradigm and cell cycle formulas. **Figure 4F** has been adapted from Figure 4J from *Boyd et al., 2015*. (G) Representative medial sections of E14.5 control and cHet F/cKO M brains stained with Ki67 (green), EdU (red) and BrdU (magenta) and pulsed with EdU and BrdU (control M and cKO M shown). Arrows indicate EdU +BrdU cells (i.e.: leaving cells). (H) Quantification of cell cycle duration (Tc) in control and cHet F/cKO M. n=5–7 embryos/condition. (I) Quantification of Ts/Tc in control and cHet F/cKO M. n=5–7 embryos/condition. Scale bars, indicated. Error bars, S.D. \*p<0.05, \*\*p<0.01. Student's unpaired, two-tailed t-test (B–E, H, I).

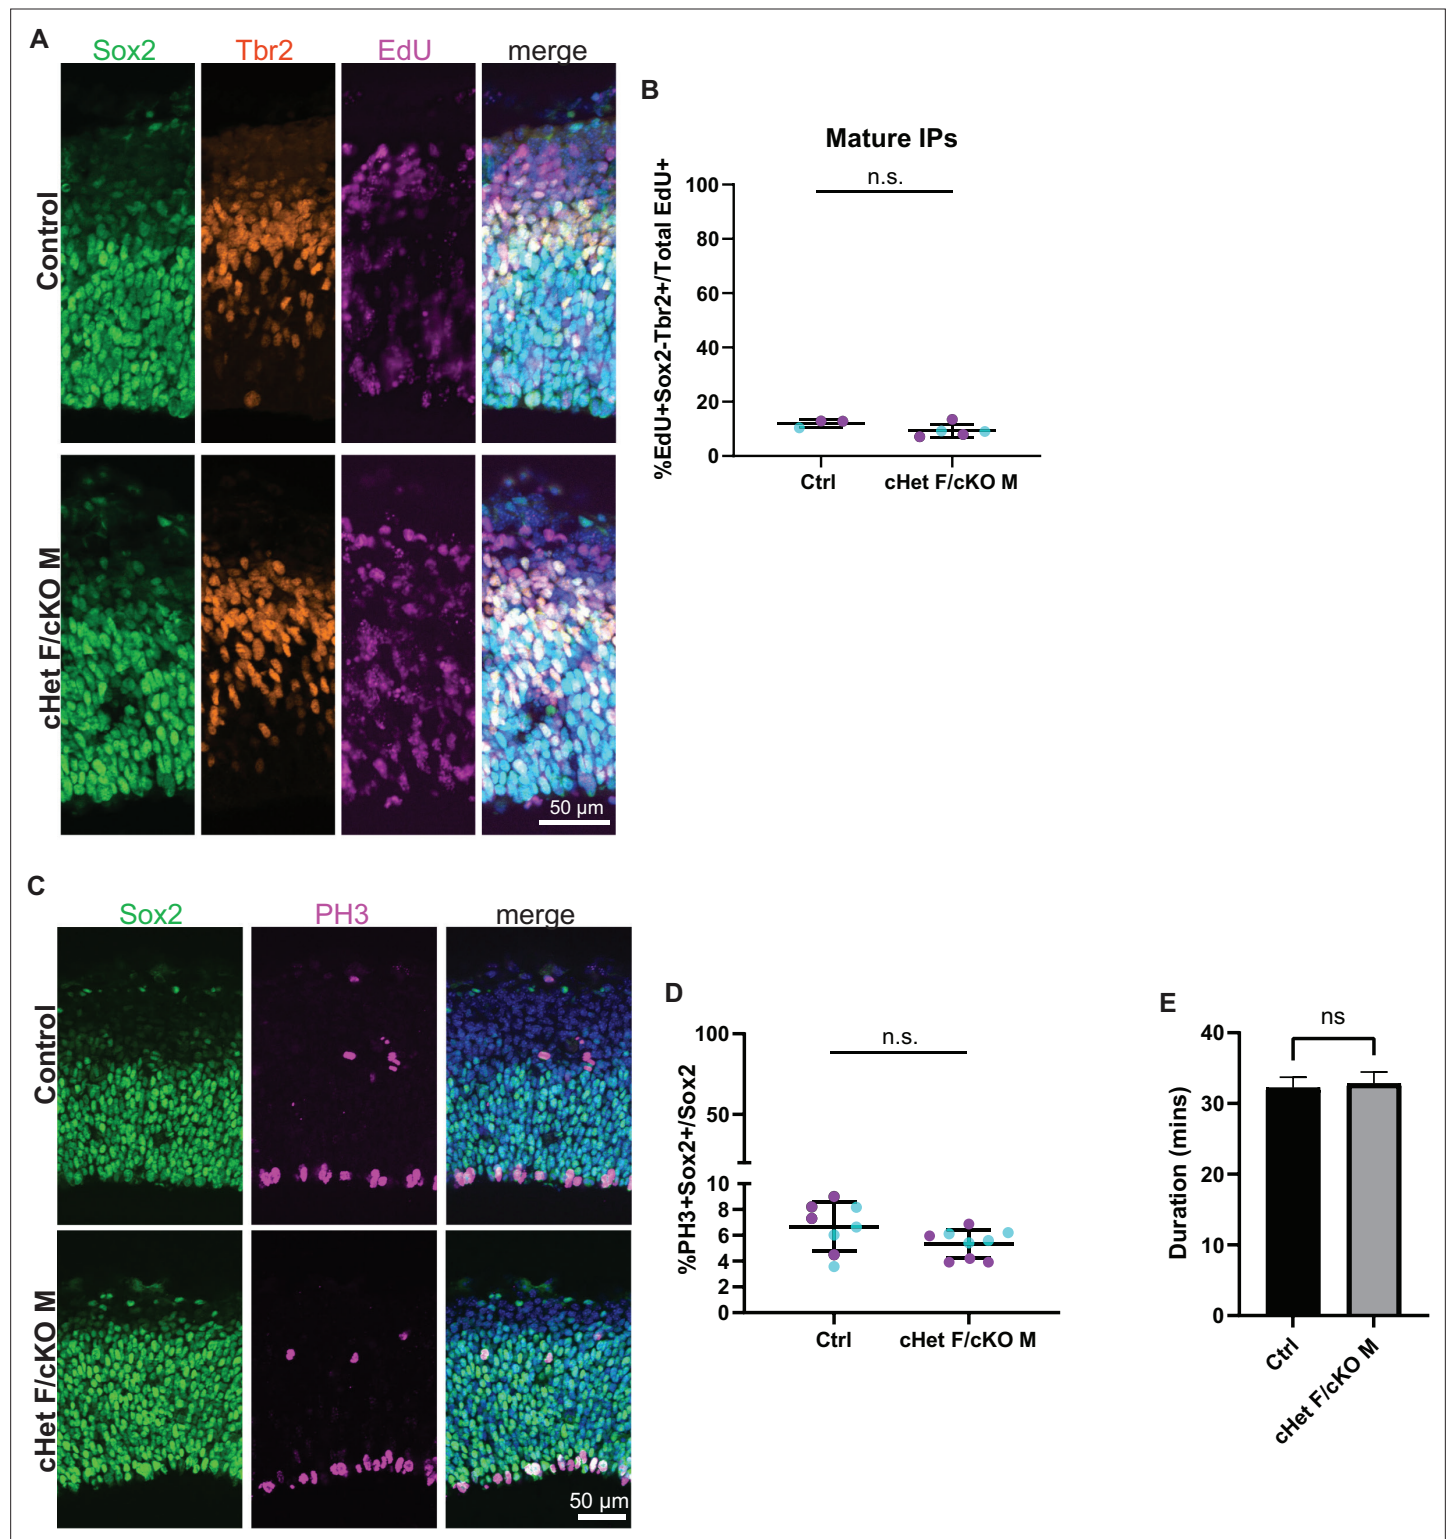

**Figure 4—figure supplement 1.** *Ddx3x* depletion prolongs cell cycle duration in RGCs and immature IPs but does not affect mitosis duration. (A) Representative coronal sections from control and cHet F/cKO M at E14.5 immunostained with Sox2 (green), Tbr2 (red), EdU (magenta) and Hoechst (control F and cHet F shown). (B) Quantification of density of mature IPs (EdU+Sox2-Tbr2+) relative to total EdU in control and cHet F/cKO M at E14.5. n=3–5 embryos/condition. (C) Representative coronal sections from control and cHet F/cKO M at E14.5 immunostained with Sox2 (green), PH3 (magenta), and Hoechst (control M and cKO M shown). (D) Quantification of PH3+Sox2+/Sox2+ in control and cHet F/cKO M. n=8–9 embryos/condition. (E) Quantification of mitosis duration in control and cHet F/cKO M at E14.5 from live imaging analysis. n=>100 cells/condition/trial with three trials. Student's unpaired, two-tailed t-test (B, D, E).

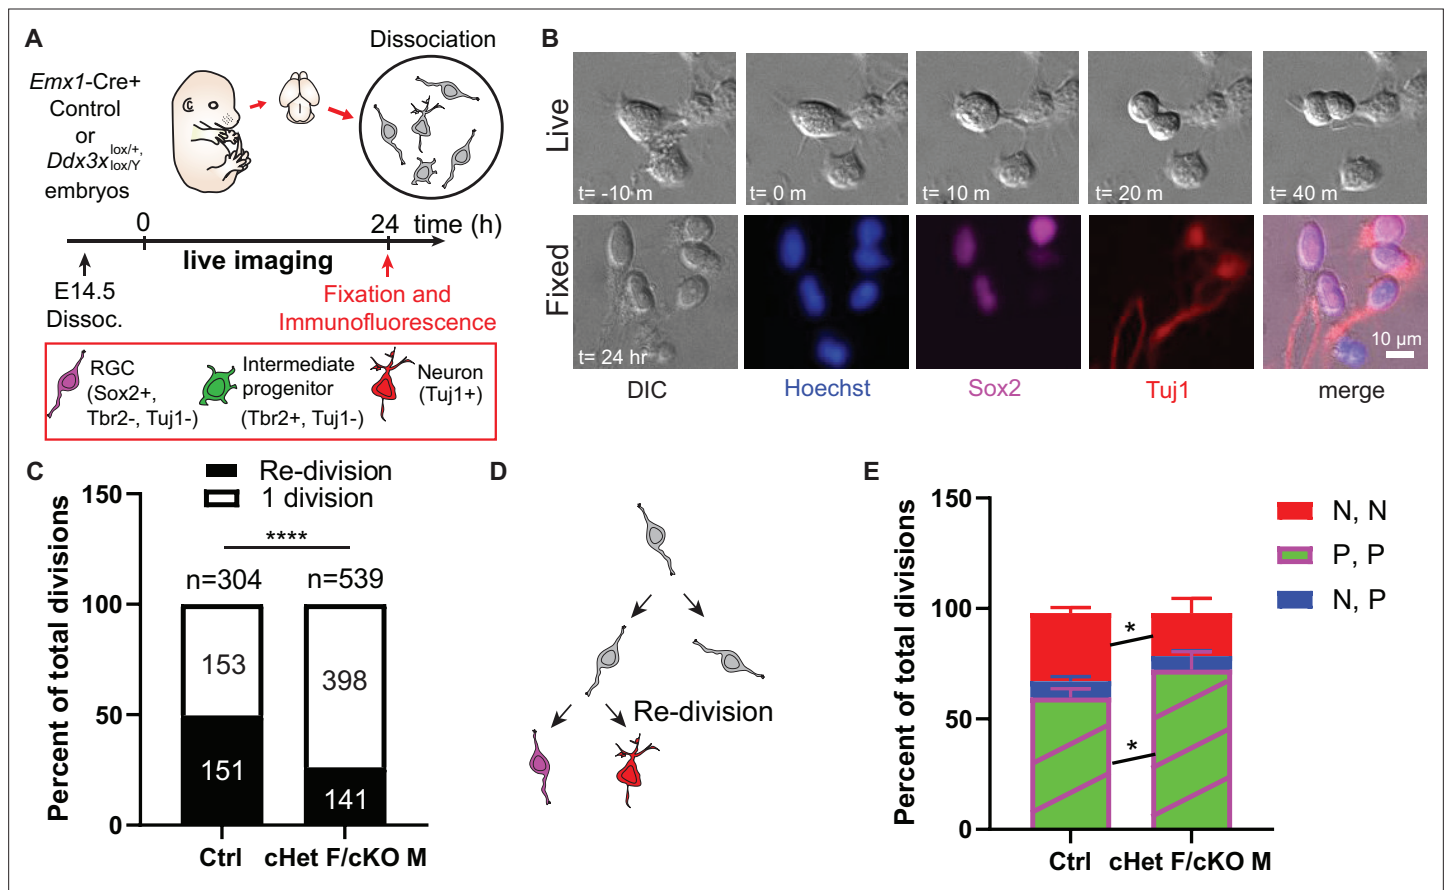

**Figure 5.** *Ddx3x*-depleted progenitors exhibit prolonged cell division and more proliferative divisions at the expense of neurogenic divisions. **(A)** Live imaging paradigm for monitoring cell fate. **Figure 5A** has been adapted from Figure 3A and E from *Pilaz et al., 2016*. **(B)** Live imaging DIC snapshots at indicated t=minutes or hours, and fixed images stained with indicated markers. **(C)** Quantification of re-divisions (black) and 1 division (white) in control and cHet F/cKO M. n=304 (control) and 539 (cHet F/cKO M) total cells. **(D)** Schematic illustrating an example of a re-division. **(E)** Quantification of cell fate for P,P divisions (2 Sox2+ RGCs, or 2 Tbr2+ IPs, or 1 Sox2+ RGC and 1 Tbr2+ Tuj1- IP); P,N divisions (1 Tuj1+ neuron and either 1 Sox2+ RGC or 1 Tbr2+ IP); N,N divisions (2 Tuj1+ neurons). n=>70 cells/condition/trial with three trials. Scale bars, indicated. Error bars, S.D. \*p<0.05, \*\*\*\*p<0.0001. Two-tailed Fisher's exact test (C), Two-way ANOVA with Sidak's correction (E).

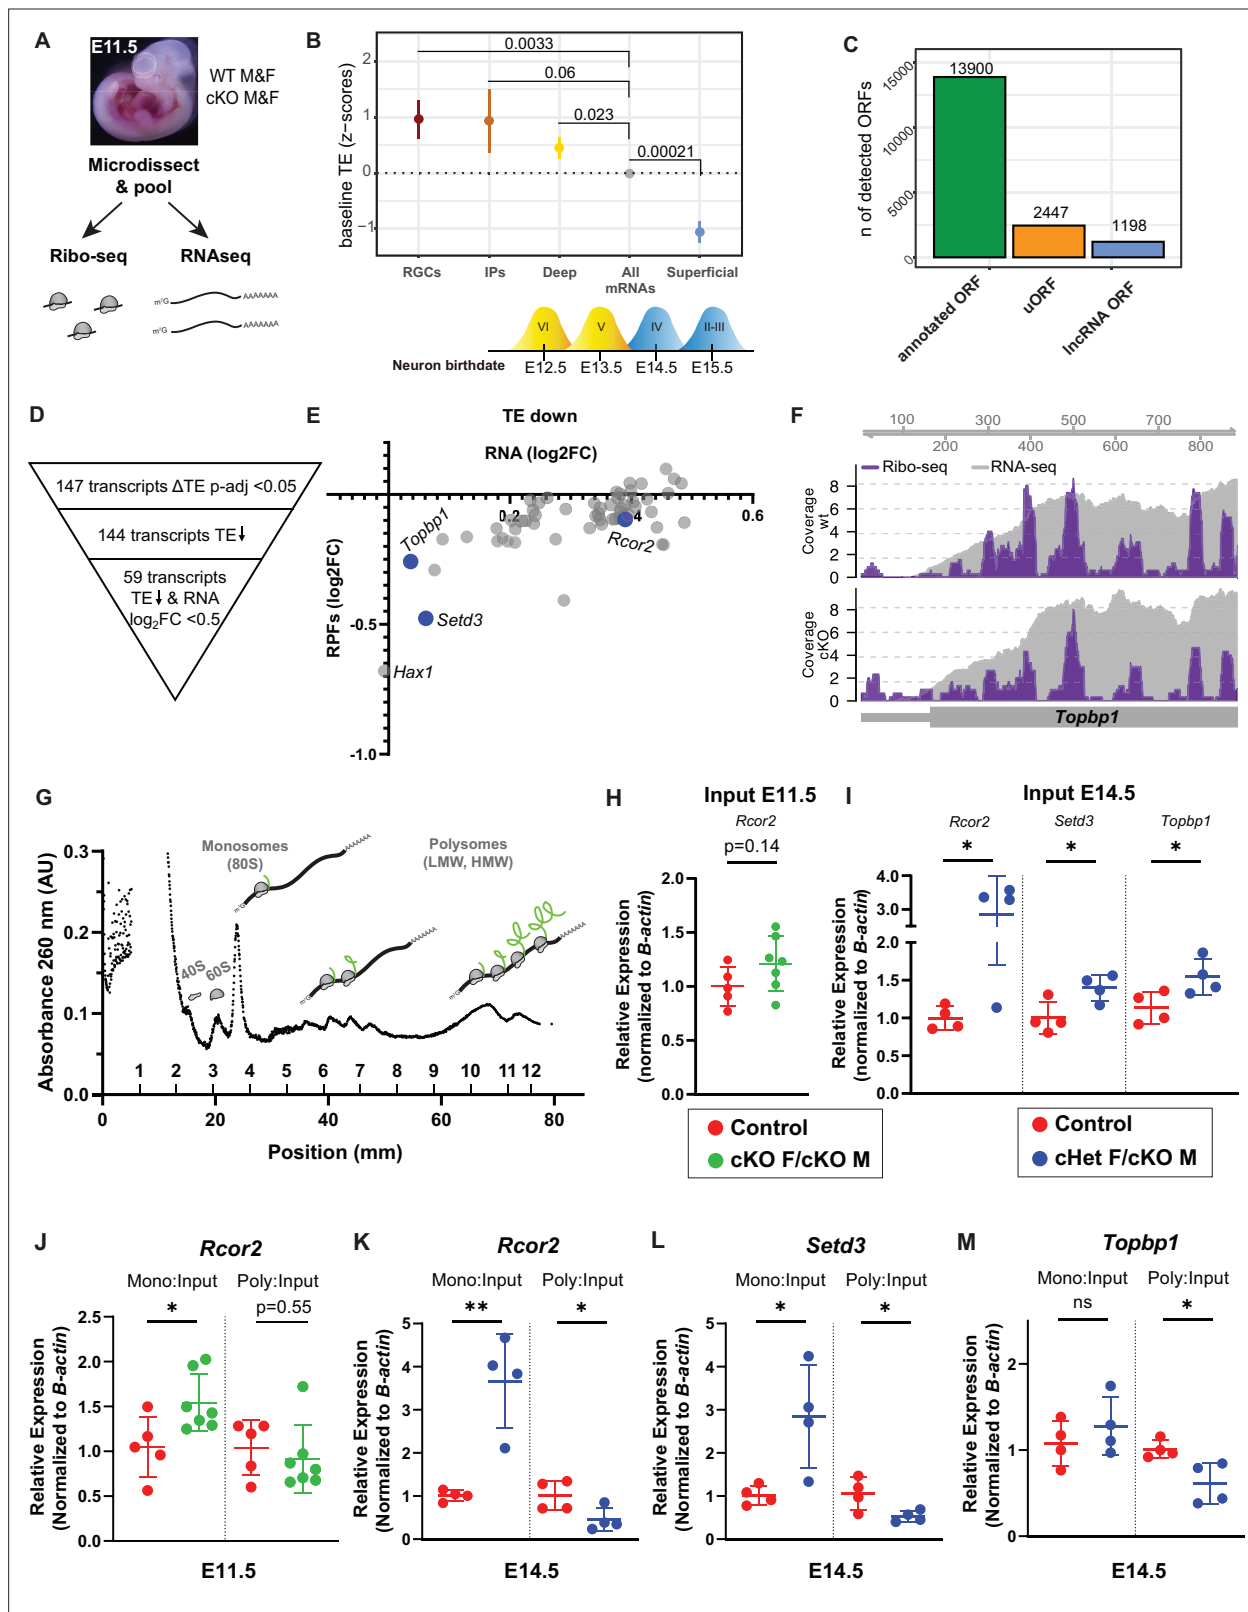

**Figure 6.** Ribosome Profiling in embryonic brains uncovers the E11.5 translome including DDX3X-dependent translation targets. **(A)** Experimental paradigm for Ribo-seq and RNA-seq of E11.5 cortices from control and cKO mice.  $n=3$ /sex/condition with four embryos pooled per  $n$ . **(B)** TE of transcripts enriched in RGCs, IPs, deep layer neurons (VI-V) and superficial layer neurons (IV-II) relative to all other mRNAs (TPM >10). Birthdates for laminar layers are indicated below. See **Supplementary file 3** for exact transcripts. **(C)** ORFquant analysis of wildtype Ribo-seq data showing

Figure 6 continued on next page

## Figure 6 continued

identification of annotated ORFs and uORFs in protein-coding and non-coding isoforms. **(D)** Schematic illustrating how DDX3X-dependent targets were prioritized. **(E)** Scatter plot of RPFs log2FC versus RNA log2FC for 59 DDX3X-dependent targets with significantly lower TE. Putative Ribo-seq targets selected for validation are highlighted in blue. **(F)** IGV screenshots illustrating RNAseq reads (gray) and RPFs (Ribo-seq; purple) for *Topbp1* in cKO mice relative to control. **(G)** Representative trace from polysome fractionation of E14.5 cortical lysate. **(H–M)** RT-qPCR quantification of mRNA levels for Ribo-seq candidates in input samples at E11.5 **(H)** and at E14.5 **(I)**, and monosome and polysome fractions at E11.5 **(J)** and E14.5 **(K–M)**.  $n=5\text{--}7/\text{condition}$  **(H, J)** and 4/condition **(I, K–M)** with two embryos pooled per  $n$ . Error bars, S.D. \* $p<0.05$ , \*\* $p<0.01$ . Two-sided Wilcoxon test **(B)**, Student's unpaired, two-tailed t-test **(H–M)**.

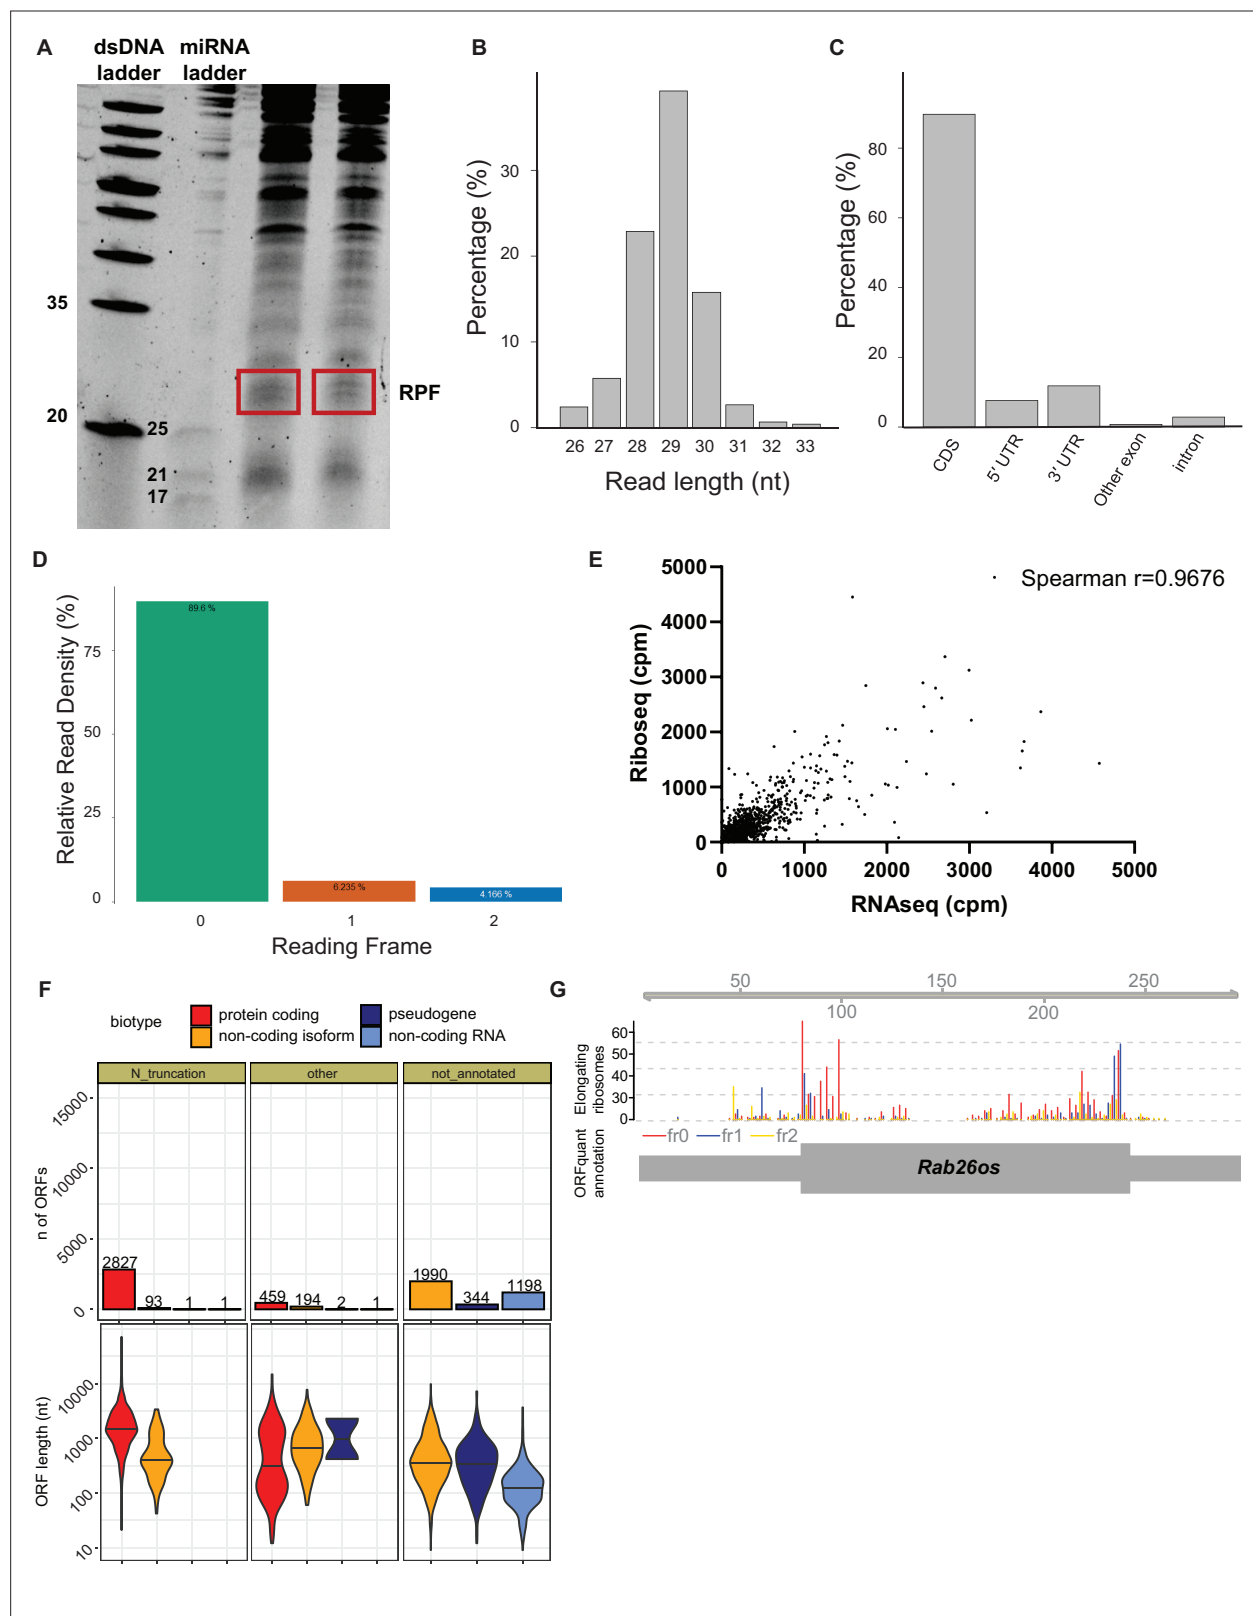

**Figure 6—figure supplement 1.** Quality Control Assessment of Ribosome Profiling in *Ddx3x* cKO mice. **(A)** Representative denaturing urea gel of embryonic cortices treated with RNase I illustrating RPFs (red box). **(B–D)** RibosomeProfilingQC assessment of deep sequencing of cDNA libraries showing read length distribution **(B)**, percent of reads mapping to CDS and UTRs, etc **(C)**, and reading frame **(D)**. **(E)** Comparison of RNAseq cpm and Riboseq cpm using all reads from all transcripts from WT data (excluding non-polyA histone and multi-mapping ribosomal genes); Spearman  $r=0.9676$ .

Figure 6—figure supplement 1 continued on next page

*Figure 6—figure supplement 1 continued*

Five transcripts were omitted when reducing axes for readability. **(F)** *De novo* identification of translated ORFs, including number of detected ORFs with their length (in nucleotides) for different ORF categories and annotated biotypes. **(G)** A novel translated ORF in the lncRNA *Rab26os* showing the P-sites position colored by frame (middle), and ORF quant-derived annotation (bottom).

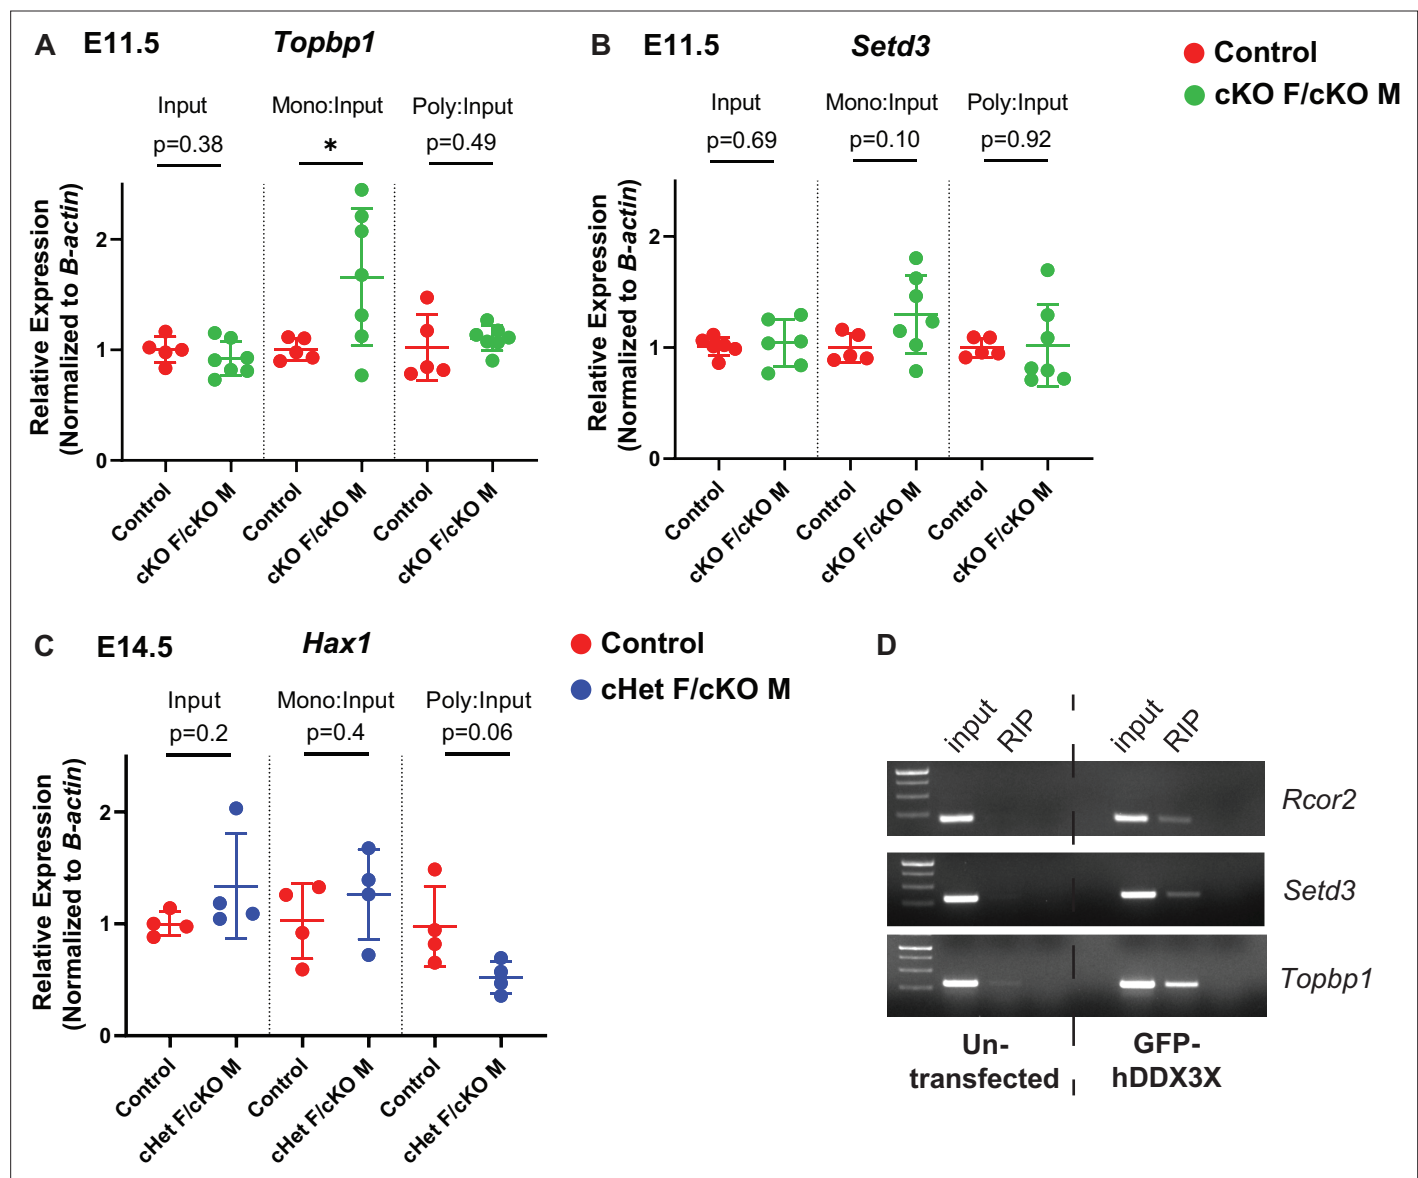

**Figure 6—figure supplement 2.** Polysome fractionation and RNA immunoprecipitations showing DDX3X targets in the cortex. (A–C) RT-qPCR quantification of mRNA levels for Ribo-seq candidates in input samples, monosome and polysome fractions at E11.5 for *Topbp1* (A) and *Setd3* (B) and at E14.5 for *Hax1* (C). (D) Representative gels of RNA immunoprecipitation of DDX3X translation targets, *Rcor2*, *Setd3*, and *Topbp1*.  $n=5-7$  embryos/condition (A, B), 4 embryos/condition (C), 3 biological replicates (D). Student's unpaired, two-tailed t-test (A–C).

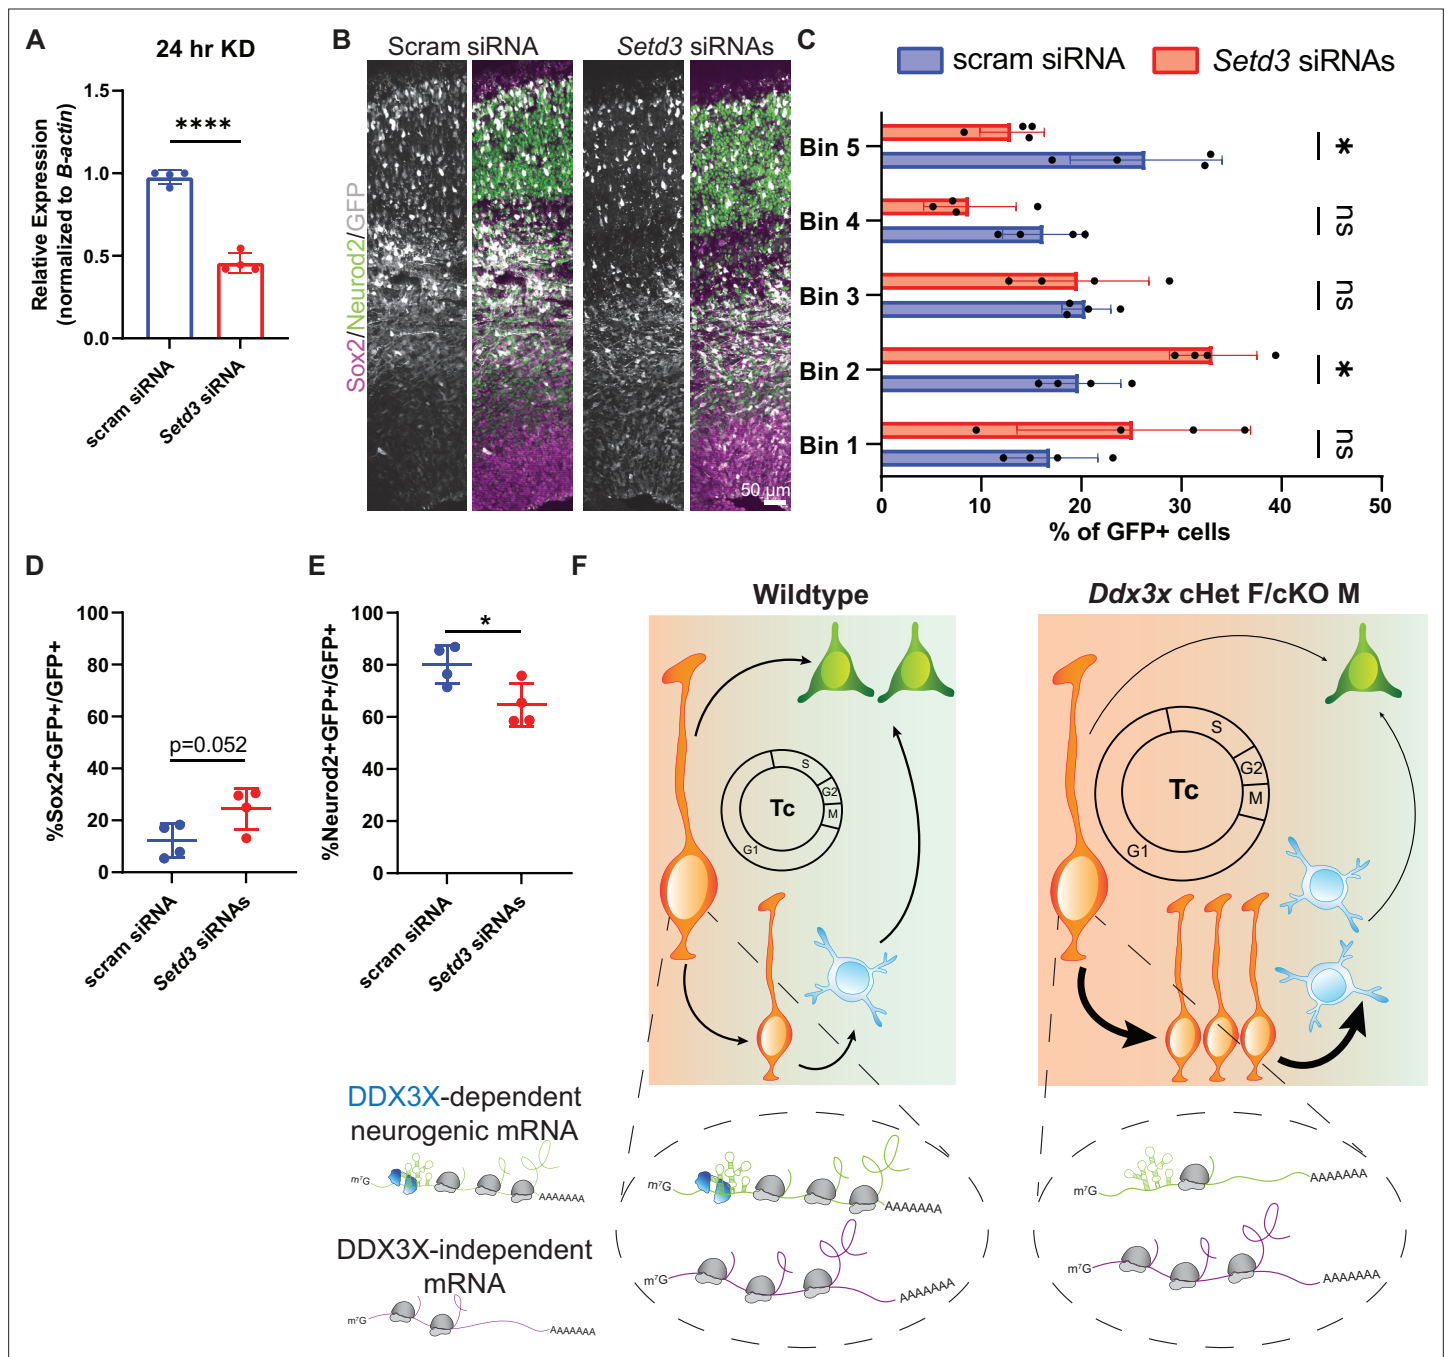

**Figure 7.** DDX3X-dependent translation target, *Setd3*, is required for neurogenesis. **(A)** RT-qPCR quantification of *Setd3* knockdown in N2A cells. n=4/condition with two independent trials. **(B)** Representative sections of E17.5 brains from mice electroporated at E14.5 with pCAG-GFP and scrambled or *Setd3* siRNAs and immunostained with GFP (grey), Sox2 (magenta), Neurod2 (green). **(C)** Quantification of distribution of GFP-positive cells in 5 even bins of cortex. n=4 embryos/condition. **(D, E)** Quantification of GFP co-localization with Sox2+ **(D)** and Neurod2+ **(E)** cells. n=4 embryos/condition. **(F)** Schematic model summarizing how loss of DDX3X-dependent translation impairs neurogenesis. Scale bars, indicated. Error bars, S.D. \*p<0.05, \*\*\*\*p<0.0001. Student's unpaired, two-tailed t-test **(A, D, E)**, Two-way ANOVA with Sidak's correction **(C)**.
