# Supplementary material for: Aberrant cortical development is driven by impaired cell cycle and translational control in a DDX3X syndrome model
Source: eLife. 2022 Jun 28;11:e78203. doi: 10.7554/eLife.78203 (PMC9239684; doi:10.7554/eLife.78203)
Supplement: Supplementary file 1. [file elife-78203-supp1.xlsx]

## Sheet: Sheet2
Main Figure	Object of the test	Comparison	Statistical test and exact p-values	number of biological replicates
1D	Quantification of smFISH Ddx3x mRNA at E12.5	Ctrl F, cHet F, cKO F, Ctrl M, cKO M	One-way ANOVA with Tukey's multiple comparison test; p=0.08 (Ctrl F vs cHet F), p=0.003 (Ctrl F vs cKO F), p=0.07 (cHet F vs cKO F), p=0.02 (Ctrl M vs cKO M)	N=2-3 embryos/ condition
1E	Ddx3x mRNA depletion in Tdtomato+ cells at E11.5	Ctrl F, cHet F, cKO F, Ctrl M, cKO M	One-way ANOVA with Tukey's multiple comparison test; p=0.002 (Ctrl F vs cHet F), p<0.0001 (Ctrl F vs cKO F), p=0.0001 (cHet F vs cKO F), p=0.0002 (Ctrl M vs cKO M)	N=3-7 embryos/condition
1F	Ddx3x mRNA depletion in Tdtomato+ cells at E14.5	Ctrl F, cHet F, cKO F, Ctrl M, cKO M	One-way ANOVA with Tukey's multiple comparison test; p<0.0001 (Ctrl F vs cHet F), p<0.0001 (Ctrl F vs cKO F), p<0.0001 (cHet F vs cKO F), p<0.0001 (Ctrl M vs cKO M)	N=3-6 embryos/condition
1G	Ddx3x mRNA expression in Tdtomato+ cells	Ctrl M vs F	student's unpaired, two-tailed t-test, p<0.0001	N=8-10 embryos/condition
1I	Quantification of cortical area at P0	Ctrl (M, F), cHet F, cKO (M, F)	One-way ANOVA with Tukey's multiple comparison test, p=0.9991 (Ctrl F vs cHet F), p<0.0001 (Ctrl F vs cKO F), p=0.9662 (Ctrl F vs Ctrl M), p=0.6908 (Ctrl F vs cKO M), p<0.0001 (cHet F vs cKO F), p=0.8918 (cHet F vs Ctrl M), p=0.5492 (cHet F vs cKO M), p<0.0001 (cKO F vs Ctrl M), p<0.0001 (cKO F vs cKO M), p=0.9382 (Ctrl M vs cKO M)	N=5-12 embryos across 6 independent litters
1M	Quantification of %CC3+ cells relative to Hoechst at E14.5	Ctrl F, cKO F	student's unpaired, two-tailed t-test	N=4-5 embryos across 4 independent litters
2A	Quantification of Ddx3y upregulation in Ddx3x cKO M vs ctrl	Ctrl M (Ddx3x vs Ddx3y), cKO M (Ddx3x vs Ddx3y)	student's paired, two-tailed t-test (Ctrl M, p=1; cKO M, p=0.005)	N=5 embryos (ctrl M) or 8 embryos (cKO M)
2E	Quantification of distribution of GFP+ cells electroporated with empty sgRNA or Ddx3y sgRNA	empty sgRNA vs Ddx3y sgRNA (M)	Two-way ANOVA with Sidak's; p=0.0014 (Bin1); 0.0180 (Bin2); 0.9996 (Bin3); 0.9474 (Bin4); <0.0001 (Bin5)	N=3 embryos (no sgRNA) or 5 embryos (Ddx3y sgRNA)
2G	Quantification of percentage of GFP-positive cells expressing SOX2	empty sgRNA vs Ddx3y sgRNA (M)	Student’s unpaired, two-tailed t-test; p=0.0007	N=3 embryos (no sgRNA) or 5 embryos (Ddx3y sgRNA)
2H	Quantification of percentage of GFP-positive cells expressing NEUROD2	empty sgRNA vs Ddx3y sgRNA (M)	Student’s unpaired, two-tailed t-test; p=0.0031	N=3 embryos (no sgRNA) or 5 embryos (Ddx3y sgRNA)
3B	Quantification of %SOX2+ cells relative to Hoechst at E14.5	Ctrl (M, F) vs cHet F/cKO M	Student’s unpaired, two-tailed t-test; p=0.035	N=7-8 embryos/condition across 6 independent litters
3C	Quantification of %TBR2+SOX2- cells relative to Hoechst at E14.5	Ctrl (M, F) vs cHet F/cKO M	Student’s unpaired, two-tailed t-test; p=0.024	N=7-8 embryos/condition across 6 independent litters
3E	Quantification of %TBR1 cells relative to Hoechst at P0	Ctrl (M, F) vs cHet F/cKO M	Student’s unpaired, two-tailed t-test; p=0.007	N=8-10 embryos/condition across 6 independent litters
3F	Quantification of %CTIP2 cells relative to Hoechst at P0	Ctrl (M, F) vs cHet F/cKO M	Student’s unpaired, two-tailed t-test; p=0.009	N=8-10 embryos/condition across 6 independent litters
3G	Quantification of %LHX2 cells relative to Hoechst at P0	Ctrl (M, F) vs cHet F/cKO M	Student’s unpaired, two-tailed t-test; p=0.078	N=8-10 embryos/condition across 6 independent litters
4B	Quantification of %EdU+Ki67+ cells relative to EdU+ at E14.5	Ctrl (M, F) vs cHet F/cKO M	Student’s unpaired, two-tailed t-test; p=0.014	N=3-5 embryos/condition across 2 independent litters
4C	Quantification of %EdU+Ki67+ cells relative to Hoechst at E14.5	Ctrl (M, F) vs cHet F/cKO M	Student’s unpaired, two-tailed t-test; p=0.013	N=3-5 embryos/condition across 2 independent litters
4D	Quantification of %EdU+SOX2+ cells relative to EdU+ at E14.5	Ctrl (M, F) vs cHet F/cKO M	Student’s unpaired, two-tailed t-test; p=0.011, with correction for 4 comparisons	N=3-5 embryos/condition across 2 independent litters
4E	Quantification of %EdU+SOX2-TBR2- cells relative to EdU+ at E14.5	Ctrl (M, F) vs cHet F/cKO M	Student’s unpaired, two-tailed t-test; p=0.015, with correction for 4 comparisons	N=3-5 embryos/condition across 2 independent litters
4H	Quantification of Tc	Ctrl (M, F) vs cHet F/cKO M	Student’s unpaired, two-tailed t-test; p=0.02	N=5-7 embryos/condition across 2 independent litters
4I	Quantification of Ts/Tc	Ctrl (M, F) vs cHet F/cKO M	Student’s unpaired, two-tailed t-test; p=0.82	N=5-7 embryos/condition across 2 independent litters
5C	Quantification of re-divisions	Ctrl (M, F) vs cHet F/cKO M	two-tailed Fisher's exact test	N=304 cells and 539 cells from 3 trials
5E	Quantification of cell fate	Ctrl (M, F) vs cHet F/cKO M	Two-way ANOVA (Sidak's); P,P: p=0.0147, N, N: p=0.0299, N,P: p=0.9855	N=3 trials and 3 independent litters; 2-3 embryos/condition with >70 cells/condition/trial
6B	TE from WT Ribo-seq data	RGC, IP, deep layer, superficial layer vs all other mRNAs	two-sided wilcoxon test (p-values listed on graph)	see supplemental excel 3 for list of transcripts
6D	TE down, padj <0.1, RNA log2FC <0.5	Ctrl (M, F) vs cKO F/cKO M		N= 6 per condition (pooled samples from >10 litters)
6H	Polysome fractionation: input (qPCR for Rcor2) at E11.5	Ctrl (M, F) vs cKO M/cKO F	Student’s unpaired, two-tailed t-test; p=0.14	N=5-7 per condition across >5 independent litters
6I	Polysome fractionation: input (qPCR for Rcor2, Setd3, Topbp1) at E14.5	Ctrl (M, F) vs cHet F/cKO M	Student’s unpaired, two-tailed t-test; p=0.019 (Rcor2), p=0.027 (Setd3), p=0.043 (Topbp1)	N=4 per condition across 3 independent litters
6J	Polysome fractionation: monosome and polysome fractions (qPCR for Rcor2) at E11.5	Ctrl (M, F) vs cKO M/cKO F	Student’s unpaired, two-tailed t-test; p=0.03 (Mono) and p=0.55 (Poly)	N=5-7 per condition across >5 independent litters
6H	Polysome fractionation: monosome and polysome fractions (qPCR for Rcor2) at E14.5	Ctrl (M, F) vs cHet F/cKO M	Student’s unpaired, two-tailed t-test; p=0.027 (Mono) and p=0.044 (Poly)	N=4 per condition across 3 independent litters
6I	Polysome fractionation: monosome and polysome fractions (qPCR for Setd3) at E14.5	Ctrl (M, F) vs cHet F/cKO M	Student’s unpaired, two-tailed t-test; p=0.024 (Mono) and p=0.037(Poly)	N=4 per condition across 3 independent litters
6J	Polysome fractionation: monosome and polysome fractions (qPCR for Topbp1) at E14.5	Ctrl (M, F) vs cHet F/cKO M	Student’s unpaired, two-tailed t-test; p=0.389 (Mono) and p=0.022(Poly)	N=4 per condition across 3 independent litters
7A	RT-qPCR quantification of Setd3 mRNA knockdown (24 hour)	scrambled siRNA vs Setd3 siRNA pool	Student’s unpaired, two-tailed t-test; p<0.0001	N=4 per condition across 2 independent trials
7C	Quantification of distribution of GFP+ cells electroporated with scrambled siRNA or Setd3 siRNA pool	scrambled siRNA vs Setd3 siRNA pool	Two-way ANOVA with Sidak's; p=0.262 (Bin1); 0.0177 (Bin2); 0.9999 (Bin3); 0.3690(Bin4); p=0.0169 (Bin5)	N=4 embryos per condition
7D	Quantification of percentage of GFP-positive cells expressing SOX2	scrambled siRNA vs Setd3 siRNA pool	Student’s unpaired, two-tailed t-test; p=0.053	N=4 embryos per condition
7E	Quantification of percentage of GFP-positive cells expressing NEUROD2	scrambled siRNA vs Setd3 siRNA pool	Student’s unpaired, two-tailed t-test; p=0.031	N=4 embryos per condition
Supp Figure	Object of the test	Comparison	Statistical test and exact p-values	number of observations
Fig 1- S1B	Cortical area (temporal: E14.5, E16.5, P0)	Ctrl F vs cHet F vs cKO F	One-way ANOVA with Tukey's multiple comparison test	N=3-12 embryos/condition across 3-6 independent litters
Fig 1- S1 D	%CC3+ cells relative to Hoechst at E12.5	Ctrl F vs cKO F	Student’s unpaired, two-tailed t-test; p=0.031	N=4 embryos/condition across 2 independent litters
Fig 1- S1H	Cortical area	Ctrl (M, F), cHet F, cKO (M, F)	One-way ANOVA with Tukey's multiple comparison test, p=0.8958 (Ctrl F vs cHet F), p=0.4761 (Ctrl F vs cKO F), p>0.9999 (Ctrl F vs Ctrl M), p>0.9999 (Ctrl F vs cKO M), p=0.9987 (cHet F vs cKO F), p=0.9187 (cHet F vs Ctrl M), p=0.9504 (cHet F vs cKO M), p=0.5310 (cKO F vs Ctrl M), p=0.7154 (cKO F vs cKO M), p>0.9999 (Ctrl M vs cKO M)	N=2-9 embryos/condition across 6 independent litters
Fig 3- S2B	Quantification of %SOX2+ cells relative to Hoechst at E13.5	Ctrl (M, F) vs cHet F/cKO M	Student’s unpaired, two-tailed t-test; p=0.1	N=6-9 embryos/condition across 2 independent litters
Fig 3- S2C	Quantification of %TBR2+SOX2- cells relative to Hoechst at E13.5	Ctrl (M, F) vs cHet F/cKO M	Student’s unpaired, two-tailed t-test; p=0.97	N=6-9 embryos/condition across 2 independent litters
Fig 3- S2D	Quantification of %SOX2-TBR2- cells relative to Hoechst at E13.5	Ctrl (M, F) vs cHet F/cKO M	Student’s unpaired, two-tailed t-test; p=0.08	N=6-9 embryos/condition across 2 independent litters
Fig 3- S2E	Quantification of %SOX2-TBR2- cells relative to Hoechst at E14.5	Ctrl (M, F) vs cHet F/cKO M	Student’s unpaired, two-tailed t-test; p=0.2	N=7-8 embryos/condition across 6 independent litters
Fig 3- S2F	Quantification of cortical thickness (total and medial only) at E14.5	Ctrl (M, F) vs cHet F/cKO M	Student’s unpaired, two-tailed t-test; p=0.78 (total), p=0.14 (medial)	N=12-17 embryos/condition across 6 independent litters
Fig 3- S2G	Quantification of distribution of TBR1+ cells	Ctrl (M, F) vs cHet F/cKO M	Two-way ANOVA (Sidak’s) p>0.999(Bin1); >0.9999 (Bin2); 0.4973(Bin3); 0.8687(Bin4); 0.9980(Bin5); 0.4255(Bin6); 0.8263(Bin7); >0.9999(Bin8); >0.9999(Bin9); >0.9999(Bin10)	N=8-10 embryos/condition across 6 independent litters
Fig 3- S2H	Quantification of distribution of CTIP2+ cells	Ctrl (M, F) vs cHet F/cKO M	Two-way ANOVA (Sidak’s) p>0.9999(Bin1); >0.9999 (Bin2); 0.4185(Bin3); 0.8184(Bin4); >0.9999(Bin5); 0.3385(Bin6); 0.2154(Bin7); >0.9999(Bin8); >0.9999(Bin9); >0.9999(Bin10)	N=8-10 embryos/condition across 6 independent litters
Fig 4- S3B	Quantification of %EdU+SOX2-TBR2+ cells relative to EdU+ at E14.5	Ctrl (M, F) vs cHet F/cKO M	Student’s unpaired, two-tailed t-test; p=0.138	N=3-5 embryos/condition across 2 independent litters
Fig 4- S3D	Quantification of %PH3+SOX2+ cells relative to Sox2+ at E14.5	Ctrl (M, F) vs cHet F/cKO M	Student’s unpaired, two-tailed t-test; p=0.1	N=8-9 embryos/condition across 6 independent litters
Fig 4- S3E	Quantification of mitosis duration	Ctrl (M, F) vs cHet F/cKO M	Student’s unpaired, two-tailed t-test; p=0.64	N=3 trials and 3 independent litters; 2-3 embryos/condition with >100 cells/condition/trial
Fig 6- S5A	Polysome fractionation: monosome and polysome fractions (qPCR for Rcor2) at E11.5	Ctrl (M, F) vs cKO M/cKO F	Student’s unpaired, two-tailed t-test; p=0.04 (Mono) and p=0.49 (Poly)	N=5-7 per condition across >5 independent litters
Fig 6- S5B	Polysome fractionation: monosome and polysome fractions (qPCR for Setd3) at E11.5	Ctrl (M, F) vs cKO M/cKO F	Student’s unpaired, two-tailed t-test; p=0.1 (Mono) and p=0.92 (Poly)	N=5-7 per condition across >5 independent litters
Fig 6- S5C	Polysome fractionation: monosome and polysome fractions (qPCR for Hax1) at E14.5	Ctrl (M, F) vs cHet F/cKO M	Student’s unpaired, two-tailed t-test; p=0.4 (Mono) and p=0.06(Poly)	N=4 per condition across 3 independent litters
