# Supplementary material for: Aberrant cortical development is driven by impaired cell cycle and translational control in a DDX3X syndrome model
Source: eLife. 2022 Jun 28;11:e78203. doi: 10.7554/eLife.78203 (PMC9239684; doi:10.7554/eLife.78203)
Supplement: Supplementary file 2. [file elife-78203-supp2.xlsx]

## Sheet: Sheet1
qPCR primers (5' --> 3')
B-actin forward	AGATCAAGATCATTGTCCT
B-actin reverse	CCTGCTTGCTGATCCACATC
Ddx3x forward	TGGAAATAGTCGCTGGTGTG
Ddx3x reverse	GGAGGACAGTTGTTGCCTGT
Ddx3y forward	CGTAAGCTCTTGCGTTCACC
Ddx3y reverse	AGGTATATAGCGCCCTTTGCT
Topbp1 forward	CAGGATTGTTGGTCCTCAAGTG
Topbp1 reverse	CCTGCAATAAGGTGAGTGACTG
Rcor2 forward	AAATCAGGTACTGGGGCTACA
Rcor2 reverse	GGCCCATTTCATTAGATCAGGGA
Setd3 forward	TGCTTCTGTGGCATAAACACG
Setd3 reverse	GGCTGGGAATCACCTTGTCAG
Hax1 forward	TTCCCACTCTCCTGAACTTCC
Hax1 reverse	GGTTGGTGACTATCTGGGTACT
sgRNAs (5' --> 3')
Ddx3y (exon 2)	TCATCAGATAATCAGAATGG
