# Supplementary material for: Aberrant cortical development is driven by impaired cell cycle and translational control in a DDX3X syndrome model
Source: eLife. 2022 Jun 28;11:e78203. doi: 10.7554/eLife.78203 (PMC9239684; doi:10.7554/eLife.78203)
Supplement: Supplementary file 3. [file elife-78203-supp3.xlsx]

## Sheet: Key
Key
DE_analysis_cKO	analysis of cKO vs ctrl using unique reads only
columns:
RNA_log2FC	log2FC cKO vs ctrl for RNAseq
RNA_padj	adjusted p-value cKO vs ctrl for RNAseq
Ribo_log2FC	log2FC cKO vs ctrl for Riboseq
Ribo_padj	adjusted p-value cKO vs ctrl for Riboseq
RiboRNA_log2FC	log2FC cKO vs ctrl for Riboseq/RNAseq (TE)
RiboRNA_padj	adjusted p-value cKO vs ctrl for Riboseq/RNAseq (TE)
RNA_cpm_base	average CPM for RNAseq from ctrls
Ribo_cpm_base	average CPM for Riboseq from ctrls
RNA_cpm_cKO	average CPM for RNAseq from cKOs
Ribo_cpm_cKO	average CPM for Riboseq from cKOs
WT TE	analysis of TE in WT (ctrl) using all reads
base_TE_allreads	average TE for ctrls using all reads
RNA_cpm_base_allreads	average CPM for RNAseq from ctrls using all reads
Ribo_cpm_base_allreads	average CPM for Riboseq from ctrls using all reads
Transcripts in 6B	cell type-enriched transcripts used in Figure 6B

## Sheet: DE_analysis_cKO
gene_id	gene_name	experiment	RNA_log2FC	RNA_padj	Ribo_log2FC	Ribo_padj	RiboRNA_log2FC	RiboRNA_padj	RNA_cpm_base	Ribo_cpm_base	RNA_cpm_cKO	Ribo_cpm_cKO
ENSMUSG00000037742.14	Eef1a1	cKO_vs_wt	-0.0254642	0.875054	0.10712	0.999978	0.128719	0.99997	15986.8	1627.75	15679.7	1780.95
ENSMUSG00000023944.14	Hsp90ab1	cKO_vs_wt	-0.0554956	0.578029	-0.112464	0.999978	-0.0610704	0.99997	6744.36	6696.34	6478.26	6272.9
ENSMUSG00000057666.18	Gapdh	cKO_vs_wt	-0.0350763	0.812289	-0.12893	0.999978	-0.11599	0.99997	4913.84	2.61012	4786.63	2.47139
ENSMUSG00000046434.16	Hnrnpa1	cKO_vs_wt	-0.00114361	0.995082	-0.274938	0.999978	-0.275643	0.554307	4583.72	181.118	4572.72	150.849
ENSMUSG00000001525.10	Tubb5	cKO_vs_wt	-0.0264412	0.807542	-0.0500541	0.999978	-0.0272872	0.99997	4293.98	9902.96	4209.2	9680.7
ENSMUSG00000052187.4	Hbb-y	cKO_vs_wt	-0.0246976	0.966924	-0.0397675	0.999978	-0.0174035	0.99997	4070.35	22427.5	3990.48	22165.7
ENSMUSG00000034994.10	Eef2	cKO_vs_wt	-0.0162536	0.901473	-0.0815357	0.999978	-0.0684715	0.99997	3955.31	2363.38	3905.77	2262.11
ENSMUSG00000015656.17	Hspa8	cKO_vs_wt	-0.0278277	0.852622	-0.14672	0.999978	-0.120642	0.99997	3265	168.21	3196.28	154.017
ENSMUSG00000072235.6	Tuba1a	cKO_vs_wt	-0.0558569	0.620748	-0.115511	0.999978	-0.0650358	0.99997	3256.62	185.988	3130.05	174.566
ENSMUSG00000023004.8	Tuba1b	cKO_vs_wt	-0.0645052	0.504042	0.117069	0.999978	0.176148	0.99997	2825.14	34.5503	2697.46	37.8085
ENSMUSG00000029580.14	Actb	cKO_vs_wt	-0.0754891	0.412619	0.0416452	0.999978	0.114136	0.99997	3591.7	5361.82	3404.1	5593.84
ENSMUSG00000004980.16	Hnrnpa2b1	cKO_vs_wt	0.0170694	0.923328	-0.183918	0.999978	-0.205391	0.973001	3345.08	5236.98	3378.41	4650.29
ENSMUSG00000032518.6	Rpsa	cKO_vs_wt	-0.0553495	0.634159	-0.700483	0.999978	-0.682915	0.99997	3313.23	0.119113	3183.19	0.0715079
ENSMUSG00000005610.17	Eif4g2	cKO_vs_wt	0.039435	0.711485	0.198481	0.999978	0.155172	0.930168	3285.99	704.494	3372.87	817.494
ENSMUSG00000055609.8	Hba-x	cKO_vs_wt	0.0168834	0.978275	-0.0717019	0.999978	-0.0900791	0.99997	3146.76	10808.1	3175.62	10484.4
ENSMUSG00000021270.13	Hsp90aa1	cKO_vs_wt	-0.00302237	0.987466	-0.061538	0.999978	-0.0637876	0.99997	2903.66	506.02	2892.55	489.945
ENSMUSG00000032294.17	Pkm	cKO_vs_wt	-0.0509943	0.65496	-0.00329143	0.999978	0.0445828	0.99997	3032.78	1542.97	2922.47	1561.16
ENSMUSG00000059005.13	Hnrnpa3	cKO_vs_wt	0.109612	0.290885	-0.0536181	0.999978	-0.164974	0.99997	2806.53	14.3346	3022.46	14.1123
ENSMUSG00000026238.14	Ptma	cKO_vs_wt	0.0854782	0.321765	0.273984	0.999978	0.179499	0.99997	2613.68	2.12208	2766.89	2.59744
ENSMUSG00000057113.13	Npm1	cKO_vs_wt	0.0592702	0.620422	-0.0172046	0.999978	-0.0807124	0.99997	2724.69	1453.55	2833.69	1448.63
ENSMUSG00000039630.10	Hnrnpu	cKO_vs_wt	0.0570438	0.561651	-0.0513954	0.999978	-0.112722	0.99997	2652.97	3698.08	2754.88	3614.15
ENSMUSG00000062825.15	Actg1	cKO_vs_wt	-0.0283128	0.873251	-0.0884743	0.999978	-0.0311807	0.99997	2167.09	1.09898	2122.19	1.0073
ENSMUSG00000116358.1	Gm49450	cKO_vs_wt	-0.107987	0.190917	-0.125545	0.999978	-0.0231951	0.99997	1898.13	182.681	1759.3	170.237
ENSMUSG00000032216.15	Nedd4	cKO_vs_wt	-0.0213166	0.867064	-0.059631	0.999978	-0.0424821	0.99997	2495.76	3230.46	2455.42	3136.16
ENSMUSG00000026234.12	Ncl	cKO_vs_wt	0.0751089	0.489843	-0.0735753	0.999978	-0.153925	0.99997	2494.94	3575.94	2622.84	3429.1
ENSMUSG00000032399.8	Rpl4	cKO_vs_wt	-0.0582977	0.613456	0.000795021	0.999978	0.0547913	0.99997	2425.58	1151.34	2325.74	1165.42
ENSMUSG00000045136.6	Tubb2b	cKO_vs_wt	0.0118782	0.934373	-0.0176039	0.999978	-0.0329577	0.99997	2149.84	760.892	2164.76	761.051
ENSMUSG00000067274.10	Rplp0	cKO_vs_wt	-0.00227238	0.991077	0.0597555	0.999978	0.0584747	0.99997	2246.45	382.569	2239.79	404.279
ENSMUSG00000060036.14	Rpl3	cKO_vs_wt	-0.0150197	0.932626	-0.168907	0.999978	-0.159278	0.99997	2133.09	55.6456	2107.23	50.1734
ENSMUSG00000064351.1	mt-Co1	cKO_vs_wt	0.0287444	0.960864	-0.274187	0.999978	-0.302225	0.99997	1956.12	51.1226	1988.8	42.2171
ENSMUSG00000019505.7	Ubb	cKO_vs_wt	-0.0536296	0.601556	0.102499	0.999978	0.147947	0.999078	1321.42	28.9222	1271.08	31.607
ENSMUSG00000021546.18	Hnrnpk	cKO_vs_wt	-0.0438662	0.645537	-0.11421	0.999978	-0.0743075	0.99997	2111.76	743.511	2045.35	695.079
ENSMUSG00000066551.12	Hmgb1	cKO_vs_wt	-0.0555169	0.656402	-0.0134757	0.999978	0.037684	0.99997	1791.97	18.5257	1720.93	18.5443
ENSMUSG00000071866.12	Ppia	cKO_vs_wt	0.0173701	0.925055	0.337534	0.999978	0.310931	0.99997	1867.81	0.500704	1887.55	0.635151
ENSMUSG00000059796.16	Eif4a1	cKO_vs_wt	0.0223976	0.861181	-0.119519	0.999978	-0.1476	0.99997	2000.3	36.7619	2028.3	34.3575
ENSMUSG00000063524.13	Eno1	cKO_vs_wt	-0.0723154	0.454702	-0.141168	0.999978	-0.0733959	0.99997	1918.17	294.925	1821.37	270.971
ENSMUSG00000062647.16	Rpl7a	cKO_vs_wt	-0.0523962	0.702269	0.36865	0.999978	0.417981	0.934876	1947.98	59.1291	1875.24	77.9724
ENSMUSG00000052217.6	Hbb-bh1	cKO_vs_wt	0.0291203	0.964301	-0.11654	0.999978	-0.149253	0.99997	1943.33	6768.84	1976.93	6342.35
ENSMUSG00000043716.13	Rpl7	cKO_vs_wt	0.00565593	0.976455	-0.194664	0.999978	-0.205983	0.99997	1916.79	606.729	1920.84	535.804
ENSMUSG00000060126.14	Tpt1	cKO_vs_wt	0.137873	0.050127	-0.416273	0.999978	-0.558495	0.825963	1785.27	181.058	1960.79	137.312
ENSMUSG00000028081.6	Rps3a1	cKO_vs_wt	-0.0368905	0.81662	0.00923156	0.999978	0.0398062	0.99997	1774.9	40.1977	1727.03	41.282
ENSMUSG00000031320.9	Rps4x	cKO_vs_wt	-0.0281318	0.865514	-0.193546	0.999978	-0.169261	0.99997	1824.64	8.15953	1786.07	7.15302
ENSMUSG00000026728.9	Vim	cKO_vs_wt	0.0701577	0.371976	-0.0649881	0.999978	-0.14012	0.874918	1785.4	3688.61	1871.57	3572.96
ENSMUSG00000022283.15	Pabpc1	cKO_vs_wt	0.0496256	0.630543	-0.0263569	0.999978	-0.0788389	0.99997	1768.01	529.667	1827.15	526.961
ENSMUSG00000029614.13	Rpl6	cKO_vs_wt	-0.0258709	0.877013	0.0652391	0.999978	0.087274	0.99997	1595.76	123.192	1564.76	131.476
ENSMUSG00000047675.15	Rps8	cKO_vs_wt	-0.0811891	0.549134	0.594175	0.999978	0.686541	0.804651	1686.06	2.59019	1590.45	3.91806
ENSMUSG00000028639.14	Ybx1	cKO_vs_wt	0.0576443	0.711491	0.0749611	0.999978	0.0154834	0.99997	1691.1	259.942	1756.8	277.755
ENSMUSG00000089989.10	Gm45713	cKO_vs_wt	-0.0763269	0.604799	-0.147504	0.999978	-0.0751825	0.99997	1636.49	525.959	1549.17	481.263
ENSMUSG00000074129.14	Rpl13a	cKO_vs_wt	-0.0760248	0.606016	-0.147335	0.999978	-0.0753293	0.99997	1636.08	533.702	1549.11	488.36
ENSMUSG00000020849.13	Ywhae	cKO_vs_wt	-0.0625868	0.448621	-0.0518052	0.999978	0.00678045	0.99997	1618.67	5844.29	1547.63	5701.66
ENSMUSG00000020914.17	Top2a	cKO_vs_wt	-0.0198116	0.899037	-0.102897	0.999978	-0.0878755	0.99997	1611.81	1827.36	1587.2	1720.23
ENSMUSG00000030795.18	Fus	cKO_vs_wt	0.035985	0.802159	-0.0320944	0.999978	-0.0708929	0.99997	1580.38	1145.58	1616.64	1133.91
ENSMUSG00000054717.7	Hmgb2	cKO_vs_wt	0.0375537	0.823305	-0.388373	0.999978	-0.428698	0.969306	1529.59	99.4997	1567.11	76.375
ENSMUSG00000058558.12	Rpl5	cKO_vs_wt	-0.00812775	0.964075	-0.907834	0.999978	-0.916039	0.99997	1367.58	0.263289	1357.6	0.145953
ENSMUSG00000028495.14	Rps6	cKO_vs_wt	-0.081774	0.423017	0.408218	0.999978	0.479899	0.947227	1232.5	1.14179	1162.87	1.54647
ENSMUSG00000020719.14	Ddx5	cKO_vs_wt	0.0751803	0.398737	0.0162756	0.999978	-0.0629018	0.99997	1550.69	771.998	1631.05	789.56
ENSMUSG00000025290.17	Rps24	cKO_vs_wt	-0.0148737	0.959233	-0.0622156	0.999978	-0.0555476	0.99997	1527.72	63.4171	1508.18	61.4814
ENSMUSG00000063229.15	Ldha	cKO_vs_wt	-0.0393035	0.808342	-0.170773	0.999978	-0.136039	0.99997	1521.88	684.452	1477.93	614.966
ENSMUSG00000003970.9	Rpl8	cKO_vs_wt	0.0439225	0.725573	-0.0129506	0.999978	-0.061003	0.99997	1528.85	3119.58	1573.05	3127.19
ENSMUSG00000007850.16	Hnrnph1	cKO_vs_wt	-0.0667714	0.431898	-0.0628334	0.999978	-0.000447593	0.99997	1513.7	1766.22	1442.77	1708.64
ENSMUSG00000044533.15	Rps2	cKO_vs_wt	0.212046	0.000154965	0.289526	0.999978	0.0767374	0.99997	1446.51	278.517	1673.29	345.866
ENSMUSG00000020358.17	Hnrnpab	cKO_vs_wt	0.105453	0.0759976	-0.0512678	0.999978	-0.160325	0.682033	1491.43	2799.33	1602.21	2734.69
ENSMUSG00000006333.14	Rps9	cKO_vs_wt	-0.0387208	0.805768	-0.0400654	0.999978	-0.00514595	0.99997	1487.59	1179.57	1445.26	1164.28
ENSMUSG00000071644.10	Eef1g	cKO_vs_wt	-0.0135544	0.930239	0.314701	0.999978	0.32626	0.99997	1426.42	31.7214	1410.72	40.3806
ENSMUSG00000069919.7	Hba-a1	cKO_vs_wt	0.253215	0.416975	0.00403588	0.999978	-0.250714	0.99997	499.092	656.002	593.054	675.562
ENSMUSG00000008682.13	Rpl10	cKO_vs_wt	-0.0200665	0.904124	0.379219	0.999978	0.39692	0.99997	1451.2	0.417267	1428.69	0.537951
ENSMUSG00000020372.15	Rack1	cKO_vs_wt	-0.0517817	0.661391	0.0129571	0.999978	0.0609892	0.99997	1458.1	2376.25	1404.52	2424.34
ENSMUSG00000058799.16	Nap1l1	cKO_vs_wt	0.0986358	0.286156	0.0715823	0.999978	-0.0322099	0.99997	1416.12	185.869	1513.44	198.061
ENSMUSG00000058546.8	Rpl23a	cKO_vs_wt	-0.133792	0.255363	0.971144	0.999978	1.11527	0.945499	1263.96	0.171019	1149.81	0.339923
ENSMUSG00000028693.15	Nasp	cKO_vs_wt	-0.0175036	0.921808	0.0317776	0.999978	0.0461066	0.99997	1393.35	2005.26	1373.86	2075.6
ENSMUSG00000071415.6	Rpl23	cKO_vs_wt	-0.0626959	0.706801	-0.271689	0.999978	-0.215666	0.99997	1374.95	27.2851	1314.09	22.8842
ENSMUSG00000003429.11	Rps11	cKO_vs_wt	-0.11315	0.34145	0.26918	0.999978	0.378897	0.516064	1365.47	395.331	1259.98	485.106
ENSMUSG00000004891.16	Nes	cKO_vs_wt	-0.0176253	0.926601	-0.0262657	0.999978	-0.0130156	0.99997	1348.4	1397.37	1330.27	1388.95
ENSMUSG00000054766.13	Set	cKO_vs_wt	0.0809359	0.411696	0.0774482	0.999978	-0.00634865	0.99997	1324.62	118.383	1398.43	127.264
ENSMUSG00000024740.10	Ddb1	cKO_vs_wt	-0.0408262	0.580765	-0.0314789	0.999978	0.00547108	0.99997	1344.75	1503.64	1305.03	1489.6
ENSMUSG00000063870.12	Chd4	cKO_vs_wt	-0.0479923	0.791192	-0.184464	0.999978	-0.140589	0.99997	1319.45	1126.3	1274.55	1003.55
ENSMUSG00000056201.8	Cfl1	cKO_vs_wt	-0.0167966	0.898104	0.0220707	0.999978	0.0361125	0.99997	1315.13	1146.21	1298.04	1180.15
ENSMUSG00000029430.13	Ran	cKO_vs_wt	0.0381188	0.779546	-0.0537886	0.999978	-0.0954707	0.99997	1294.06	601.256	1326.42	587.817
ENSMUSG00000028452.7	Vcp	cKO_vs_wt	0.0410224	0.67944	-0.14287	0.999978	-0.187623	0.690172	1275.21	199.225	1310.01	182.424
ENSMUSG00000039218.17	Srrm2	cKO_vs_wt	-0.0554939	0.63979	-0.0570592	0.999978	-0.00442113	0.99997	1304.52	1027.91	1253.15	1002.97
ENSMUSG00000038900.17	Rpl12	cKO_vs_wt	0.110303	0.169571	0.296696	0.999978	0.182388	0.99997	1292.68	1.17925	1393.12	1.4667
ENSMUSG00000052727.6	Map1b	cKO_vs_wt	0.0205603	0.940945	0.0213167	0.999978	-0.00371856	0.99997	1297.98	1700.17	1315.02	1748.03
ENSMUSG00000025393.12	Atp5b	cKO_vs_wt	0.0347139	0.830233	-0.0207628	0.999978	-0.0594467	0.99997	1296.82	2443.68	1326.54	2435.19
ENSMUSG00000049517.8	Rps23	cKO_vs_wt	-0.0237239	0.908443	0.460105	0.999978	0.462045	0.99997	1134.33	0.208858	1113.68	0.286698
ENSMUSG00000030744.13	Rps3	cKO_vs_wt	-0.0383345	0.789607	0.0289298	0.999978	0.0638714	0.99997	1280.2	1507.97	1244.81	1557.51
ENSMUSG00000024393.14	Prrc2a	cKO_vs_wt	-0.0422242	0.760581	-0.0399102	0.999978	-0.000677013	0.99997	1275.32	383.51	1237	377.927
ENSMUSG00000025428.15	Atp5a1	cKO_vs_wt	-0.0300382	0.750813	-0.0649415	0.999978	-0.038795	0.99997	1275.12	2332.12	1247.11	2255.91
ENSMUSG00000079523.8	Tmsb10	cKO_vs_wt	-0.0815739	0.594337	-0.348166	0.999978	-0.257404	0.99997	1268.73	0.11993	1197.43	0.0926647
ENSMUSG00000061477.4	Rps7	cKO_vs_wt	-0.0120746	0.959239	0.0987469	0.999978	0.108258	0.99997	1248.99	33.1526	1236.5	36.3519
ENSMUSG00000045128.9	Rpl18a	cKO_vs_wt	-0.114379	0.390289	-0.388958	0.999978	-0.274574	0.935695	1095.98	45.5385	1010.53	34.8742
ENSMUSG00000069917.7	Hba-a2	cKO_vs_wt	-0.125399	0.882364	-0.172726	0.999978	-0.0485875	0.99997	185.467	247.892	169.527	225.938
ENSMUSG00000037894.13	H2afz	cKO_vs_wt	0.0617649	0.637778	-0.0758471	0.999978	-0.134536	0.99997	1171.98	1.32002	1221.2	1.24536
ENSMUSG00000025794.9	Rpl14	cKO_vs_wt	0.0419318	0.789482	0.023373	0.999978	-0.025948	0.99997	1201.99	30.3933	1235.15	31.0894
ENSMUSG00000020460.15	Rps27a	cKO_vs_wt	-0.0490348	0.760581	-0.0840869	0.999978	0.0548746	0.99997	1232.44	0.332203	1189.09	0.296039
ENSMUSG00000041453.12	Rpl21	cKO_vs_wt	0.00408661	0.986468	2.09638	0.999978	2.07299	0.731376	1204.46	0.0747823	1205.25	0.264781
ENSMUSG00000001440.5	Kpnb1	cKO_vs_wt	0.0519429	0.503483	0.0416795	0.999978	-0.0139408	0.99997	1227.47	1735.15	1270.68	1807.86
ENSMUSG00000000568.15	Hnrnpd	cKO_vs_wt	0.0628452	0.534515	-0.028418	0.999978	-0.0953842	0.99997	1214.35	2040.48	1266.11	2024.26
ENSMUSG00000005566.14	Trim28	cKO_vs_wt	-0.0716108	0.411696	-0.0395218	0.999978	0.0283063	0.99997	1197.85	1669.84	1138.5	1645.87
ENSMUSG00000042699.11	Dhx9	cKO_vs_wt	-0.0350342	0.795608	-0.1313	0.999978	-0.10023	0.99997	1196.31	1413.91	1165.5	1303.6
ENSMUSG00000064370.1	mt-Cytb	cKO_vs_wt	0.0874567	0.879118	-0.205687	0.999978	-0.29277	0.99997	1187.12	41.4403	1256.88	35.9183
ENSMUSG00000064341.1	mt-Nd1	cKO_vs_wt	0.170678	0.664194	-0.16801	0.999978	-0.338254	0.99997	1184.87	22.6801	1329.13	20.1555
ENSMUSG00000017404.12	Rpl19	cKO_vs_wt	-0.0546166	0.761458	-0.208548	0.999978	-0.13356	0.99997	1155.69	0.273272	1110.62	0.235176
ENSMUSG00000045983.16	Eif4g1	cKO_vs_wt	0.020338	0.860608	-0.0393269	0.999978	-0.0632547	0.99997	1180.98	766.738	1195.63	754.817
ENSMUSG00000062070.12	Pgk1	cKO_vs_wt	-0.0184992	0.903987	0.245966	0.999978	0.194644	0.99997	1104.57	0.19831	1088.4	0.249488
ENSMUSG00000036371.6	Serbp1	cKO_vs_wt	0.0977089	0.263687	-0.0242806	0.999978	-0.126399	0.961421	1167.14	1827.81	1246.36	1817.45
ENSMUSG00000050708.16	Ftl1	cKO_vs_wt	0.0293569	0.860608	0.254383	0.999978	0.218003	0.99997	1139.23	13.0575	1161.26	15.921
ENSMUSG00000027523.20	Gnas	cKO_vs_wt	-0.0394498	0.704218	-0.0775148	0.999978	-0.0414907	0.99997	1164.14	1711.7	1131.56	1643.41
ENSMUSG00000027184.14	Caprin1	cKO_vs_wt	0.0183955	0.883218	-0.0713852	0.999978	-0.0942021	0.99997	1148.56	1425.44	1161.62	1370.81
ENSMUSG00000028820.13	Sfpq	cKO_vs_wt	0.0474164	0.70582	-0.112819	0.999978	-0.164431	0.913093	1144.34	1278.33	1180.22	1197.97
ENSMUSG00000061315.14	Naca	cKO_vs_wt	-0.00996104	0.960425	0.0162136	0.999978	0.0209733	0.99997	1138.5	86.9868	1128.39	89.0837
ENSMUSG00000057841.5	Rpl32	cKO_vs_wt	-0.0308813	0.900022	-0.0846389	0.999978	-0.0568748	0.99997	1105.22	142.228	1079.71	134.782
ENSMUSG00000006932.17	Ctnnb1	cKO_vs_wt	-0.0622512	0.470109	0.00396428	0.999978	0.0623842	0.99997	1100.87	2111.11	1053.49	2142.23
ENSMUSG00000059208.15	Hnrnpm	cKO_vs_wt	0.125955	0.0442112	-0.0593721	0.999978	-0.19078	0.773128	1100.74	1784.91	1198.58	1733.14
ENSMUSG00000031311.17	Nono	cKO_vs_wt	-0.0977564	0.129136	-0.0399873	0.999978	0.0537804	0.99997	1095.54	423.113	1021.86	416.499
ENSMUSG00000024608.11	Rps14	cKO_vs_wt	-0.0272567	0.903095	-0.0477742	0.999978	-0.0253611	0.99997	1065.63	519.931	1043.78	507.73
ENSMUSG00000030432.12	Rpl28	cKO_vs_wt	-0.132778	0.0803948	-1.05711	0.999978	-0.886206	0.961421	1079.11	0.477898	982.527	0.225486
ENSMUSG00000047215.14	Rpl9	cKO_vs_wt	-0.039568	0.791604	-0.328802	0.999978	-0.299808	0.99997	1071.89	0.373308	1041.11	0.298805
ENSMUSG00000063457.14	Rps15	cKO_vs_wt	-0.0174719	0.938298	0.187608	0.999978	0.20199	0.99997	1072.94	238.648	1058.1	276.812
ENSMUSG00000006728.12	Cdk4	cKO_vs_wt	-0.0115693	0.93399	-0.0900462	0.999978	-0.0822513	0.99997	1065.37	1110.75	1055.54	1055.89
ENSMUSG00000001924.15	Uba1	cKO_vs_wt	-0.022244	0.82493	-0.0229154	0.999978	-0.00447053	0.99997	1051.83	1469.37	1034.36	1464.1
ENSMUSG00000024991.8	Eif3a	cKO_vs_wt	-0.0585046	0.614401	-0.159142	0.999978	-0.104644	0.99997	1046.27	1091.2	1002.29	989.112
ENSMUSG00000062328.8	Rpl17	cKO_vs_wt	-0.0866496	0.65109	-0.570202	0.999978	-0.500746	0.99997	1029.37	0.570176	967.269	0.388686
ENSMUSG00000056851.14	Pcbp2	cKO_vs_wt	-0.00644648	0.965572	0.0646294	0.999978	0.0674857	0.99997	1033.49	853.198	1027.48	902.573
ENSMUSG00000012405.16	Rpl15	cKO_vs_wt	0.00196747	0.992401	-1.02814	0.999978	-1.01998	0.99997	824.957	0.228054	824.622	0.107066
ENSMUSG00000028832.11	Stmn1	cKO_vs_wt	0.0387632	0.775397	-0.176757	0.999978	-0.21732	0.99997	946.641	6.50496	971.412	5.80161
ENSMUSG00000073702.11	Rpl31	cKO_vs_wt	-0.0775269	0.623449	-0.0129615	0.999978	0.00118535	0.99997	953.731	0.135523	901.928	0.148248
ENSMUSG00000032249.14	Anp32a	cKO_vs_wt	0.0581796	0.644037	-0.156089	0.999978	-0.218229	0.936038	996.55	1778.32	1035.58	1609.87
ENSMUSG00000008348.9	Ubc	cKO_vs_wt	-0.0218561	0.945766	0.00857592	0.999978	0.0275619	0.99997	103.447	77.8629	101.743	79.3869
ENSMUSG00000020850.14	Prpf8	cKO_vs_wt	-0.0948966	0.199293	-0.113816	0.999978	-0.0225866	0.99997	984.301	703.905	919.947	658.936
ENSMUSG00000025362.6	Rps26	cKO_vs_wt	-0.0372526	0.84555	0.100407	0.999978	0.134444	0.99997	961.79	237.418	935.151	258.436
ENSMUSG00000057236.10	Rbbp4	cKO_vs_wt	-0.00861097	0.949371	-0.104231	0.999978	-0.099743	0.947227	976.046	1077.38	968.813	1014.55
ENSMUSG00000032187.16	Smarca4	cKO_vs_wt	0.0455483	0.62531	-0.0519062	0.999978	-0.101789	0.99997	971.869	540.591	1001.21	528.767
ENSMUSG00000061787.15	Rps17	cKO_vs_wt	-0.0550249	0.724564	0.451156	0.999978	0.561014	0.99997	955.272	0.319136	917.629	0.412788
ENSMUSG00000008668.15	Rps18	cKO_vs_wt	-0.0174946	0.931487	-0.171138	0.999978	-0.159294	0.99997	939.44	241.43	926.058	215.991
ENSMUSG00000068823.10	Csde1	cKO_vs_wt	0.0125367	0.93282	-0.033222	0.999978	-0.0500123	0.99997	936.69	385.963	943.476	380.744
ENSMUSG00000028484.16	Psip1	cKO_vs_wt	0.0724809	0.500758	-0.16766	0.999978	-0.244725	0.665027	923.607	541.05	969.268	487.249
ENSMUSG00000009079.16	Ewsr1	cKO_vs_wt	0.0261014	0.814731	0.05443	0.999978	0.0251534	0.99997	922.324	340.214	937.163	358.235
ENSMUSG00000071172.13	Srsf3	cKO_vs_wt	-0.0146717	0.911474	-0.0443623	0.999978	-0.034303	0.99997	875.958	91.8603	865.758	90.0035
ENSMUSG00000026496.11	Parp1	cKO_vs_wt	0.0158885	0.913043	-0.0305622	0.999978	-0.0509973	0.99997	912.95	914.296	921.435	905.803
ENSMUSG00000025153.9	Fasn	cKO_vs_wt	-0.0997469	0.12342	-0.0700098	0.999978	0.026662	0.99997	910.045	1014.97	848.186	981.319
ENSMUSG00000030662.10	Ipo5	cKO_vs_wt	-0.00770808	0.960983	0.0787043	0.999978	0.0826413	0.99997	909.316	882.1	903.108	943.892
ENSMUSG00000015165.16	Hnrnpl	cKO_vs_wt	-0.0472354	0.619821	-0.063027	0.999978	-0.0199022	0.99997	903.359	2583.92	872.642	2500.62
ENSMUSG00000017485.11	Top2b	cKO_vs_wt	0.0619806	0.574582	-0.0445425	0.999978	-0.111324	0.99997	894.549	713.826	932.13	699.181
ENSMUSG00000068039.13	Tcp1	cKO_vs_wt	-0.0195566	0.894472	0.0283405	0.999978	0.0442631	0.99997	890.28	1431.51	876.896	1475.58
ENSMUSG00000024590.8	Lmnb1	cKO_vs_wt	0.000412725	0.997406	-0.112103	0.999978	-0.116094	0.948314	886.648	1881.81	885.599	1763.12
ENSMUSG00000028333.10	Anp32b	cKO_vs_wt	0.0604799	0.667951	-0.180765	0.999978	-0.24589	0.99997	878.508	868.695	914.439	771.954
ENSMUSG00000062997.6	Rpl35	cKO_vs_wt	-0.0380906	0.882767	0.868086	0.999978	0.91631	0.99997	827.193	0.496269	803.776	0.94388
ENSMUSG00000005161.15	Prdx2	cKO_vs_wt	-0.0161089	0.921221	0.0146559	0.999978	0.0267711	0.99997	873.952	1117.23	862.762	1142.83
ENSMUSG00000000787.12	Ddx3x	cKO_vs_wt	-0.490193	1.47653e-08	-0.602111	0.0328611	-0.116452	0.99997	873.561	1342.18	621.671	893.157
ENSMUSG00000024853.10	Sf3b2	cKO_vs_wt	-0.0225299	0.863619	-0.084919	0.999978	-0.065592	0.99997	864.995	955.797	850.086	913.976
ENSMUSG00000060938.14	Rpl26	cKO_vs_wt	-0.0278436	0.91222	0.796349	0.999978	0.819123	0.90425	850.994	17.2542	833.002	30.5472
ENSMUSG00000038252.13	Ncapd2	cKO_vs_wt	-0.106867	0.0208311	-0.0267446	0.999978	0.0764677	0.99997	862.871	657.234	799.96	654.962
ENSMUSG00000022234.15	Cct5	cKO_vs_wt	-0.0691481	0.457362	-0.0417291	0.999978	0.0227133	0.99997	849.845	1574.97	808.731	1546.82
ENSMUSG00000025261.17	Huwe1	cKO_vs_wt	-0.0336344	0.884199	-0.030829	0.999978	-0.00216178	0.99997	847.68	478.248	826.685	474.208
ENSMUSG00000060743.12	H3f3a	cKO_vs_wt	-0.013553	0.938114	0.605338	0.999978	0.522976	0.99997	810.126	0.144509	801.414	0.230827
ENSMUSG00000007892.8	Rplp1	cKO_vs_wt	-0.0680538	0.689447	-0.256118	0.999978	-0.192822	0.99997	844.998	138.96	804.265	117.978
ENSMUSG00000025980.14	Hspd1	cKO_vs_wt	0.0292721	0.901844	-0.0626402	0.999978	-0.0956083	0.99997	837.548	321.488	853.694	310.476
ENSMUSG00000053931.11	Cnn3	cKO_vs_wt	0.0251137	0.852622	-0.0366186	0.999978	-0.0654243	0.99997	842.38	321.409	855.725	317.571
ENSMUSG00000020900.15	Myh10	cKO_vs_wt	-0.0554864	0.598357	-0.11705	0.999978	-0.0657911	0.99997	842.439	1211.65	809.29	1130.86
ENSMUSG00000025613.13	Cct8	cKO_vs_wt	0.0178584	0.909143	-0.049714	0.999978	-0.0712845	0.99997	835.43	1709.47	844.724	1668.91
ENSMUSG00000046364.14	Rpl27a	cKO_vs_wt	0.437576	1.13381e-08	0.513731	0.999978	0.0375876	0.99997	747.837	0.974737	1010.01	1.45429
ENSMUSG00000064357.1	mt-Atp6	cKO_vs_wt	0.157541	0.860608	NA	NA	-0.221431	0.99997	20.4088	0	22.6562	0
ENSMUSG00000031004.8	Mki67	cKO_vs_wt	-0.0744437	0.709093	-0.128811	0.999978	-0.0582435	0.99997	822.956	370.519	779.586	342.835
ENSMUSG00000042079.13	Hnrnpf	cKO_vs_wt	0.00209056	0.991165	-0.168234	0.999978	-0.179438	0.99997	566.772	2.66592	566.882	2.4355
ENSMUSG00000030695.16	Aldoa	cKO_vs_wt	-0.0723786	0.567174	-0.0110551	0.999978	0.0575065	0.99997	820.691	490.263	778.785	495.11
ENSMUSG00000060261.15	Gtf2i	cKO_vs_wt	0.020414	0.850357	-0.0875484	0.999978	-0.112131	0.941135	822.861	506.712	833.185	481.935
ENSMUSG00000098274.7	Rpl24	cKO_vs_wt	-0.0260882	0.888951	-0.578521	0.999978	-0.611557	0.99997	818.805	0.463944	802.461	0.331226
ENSMUSG00000043091.9	Tuba1c	cKO_vs_wt	-0.0840942	0.273391	-0.250226	0.999978	-0.172616	0.99997	170.315	25.9082	160.384	22.1381
ENSMUSG00000059291.15	Rpl11	cKO_vs_wt	-0.0987075	0.42775	0.19158	0.999978	0.2859	0.99997	790.227	1.72865	736.564	2.00553
ENSMUSG00000006998.16	Psmd2	cKO_vs_wt	-0.056183	0.454253	-0.0261432	0.999978	0.0262604	0.99997	811.567	591.299	779.404	588.437
ENSMUSG00000016559.14	H3f3b	cKO_vs_wt	0.135327	0.0959306	0.092115	0.999978	-0.0462387	0.99997	809.083	282.541	887.539	305.775
ENSMUSG00000025982.13	Sf3b1	cKO_vs_wt	-0.030047	0.852622	-0.127982	0.999978	-0.101734	0.99997	804.662	1042.94	786.629	964.164
ENSMUSG00000055553.16	Kxd1	cKO_vs_wt	-0.169666	0.110682	0.0633795	0.999978	0.225998	0.896605	703.587	37.1586	624.229	39.4391
ENSMUSG00000060373.15	Hnrnpc	cKO_vs_wt	-0.00853309	0.959239	-0.0625261	0.999978	-0.0584354	0.99997	803.924	613.756	797.613	593.534
ENSMUSG00000023456.15	Tpi1	cKO_vs_wt	-0.0632373	0.606567	-0.113361	0.999978	-0.0542344	0.99997	803.819	955.612	767.805	896.165
ENSMUSG00000037236.16	Matr3	cKO_vs_wt	0.0610898	0.66066	-0.104803	0.999978	-0.171012	0.99997	798.921	959.432	832.07	900.637
ENSMUSG00000062270.14	Morf4l1	cKO_vs_wt	-0.0276226	0.842344	-0.0174521	0.999978	0.00910102	0.99997	763.955	47.5551	748.208	47.2758
ENSMUSG00000034024.8	Cct2	cKO_vs_wt	-0.0217675	0.882364	0.019478	0.999978	0.0373664	0.99997	786.364	1107.05	773.417	1134.01
ENSMUSG00000004099.16	Dnmt1	cKO_vs_wt	-0.0288098	0.797748	-0.114502	0.999978	-0.0898251	0.99997	782.991	801.258	766.332	749.496
ENSMUSG00000040785.19	Ttc3	cKO_vs_wt	0.0163793	0.921808	0.0213398	0.999978	0.000702141	0.99997	780.542	293.021	788.477	300.637
ENSMUSG00000027067.16	Ssrp1	cKO_vs_wt	-0.00276111	0.985508	-0.0748996	0.999978	-0.0760378	0.99997	777.186	675.158	774.574	648.245
ENSMUSG00000019432.15	Ddx39b	cKO_vs_wt	-0.0554138	0.567174	0.0388499	0.999978	0.0899129	0.99997	776.821	1475.14	746.294	1531.92
ENSMUSG00000034349.14	Smc4	cKO_vs_wt	0.1259	0.0886641	-0.0765845	0.999978	-0.206272	0.980438	775.185	503.101	844.235	481.741
ENSMUSG00000012848.15	Rps5	cKO_vs_wt	-0.0984061	0.444865	0.067327	0.999978	0.162697	0.948314	775.895	1310.02	723.454	1389.4
ENSMUSG00000090137.8	Uba52	cKO_vs_wt	-0.174514	0.0989478	-0.073158	0.999978	0.0909094	0.99997	673.971	20.6666	595.926	20.044
ENSMUSG00000029447.11	Cct6a	cKO_vs_wt	0.0970282	0.34737	0.0133751	0.999978	-0.0877097	0.99997	772.171	1410.24	824.416	1438.69
ENSMUSG00000009927.9	Rps25	cKO_vs_wt	-0.0917622	0.554781	0.0198413	0.999978	0.105935	0.99997	764.853	51.8655	716.116	53.5312
ENSMUSG00000018362.14	Kpna2	cKO_vs_wt	0.00775049	0.960864	0.733572	0.999978	0.720312	0.241961	682.952	15.013	685.686	25.2108
ENSMUSG00000028410.13	Dnaja1	cKO_vs_wt	0.0299505	0.811282	0.18137	0.999978	0.149548	0.99997	663.004	16.993	675.712	19.5216
ENSMUSG00000022285.17	Ywhaz	cKO_vs_wt	-0.00646208	0.963003	-0.118581	0.999978	-0.115236	0.99997	660.411	85.8639	656.557	79.5327
ENSMUSG00000062380.4	Tubb3	cKO_vs_wt	-0.0520766	0.706926	-0.116992	0.999978	-0.0681903	0.99997	754.735	1044.57	727.137	974.703
ENSMUSG00000021910.15	Nisch	cKO_vs_wt	0.0184334	0.896731	-0.0355766	0.999978	-0.058176	0.99997	749.515	707.2	758.015	698.707
ENSMUSG00000030978.10	Rrm1	cKO_vs_wt	-0.0159919	0.904946	-0.0545425	0.999978	-0.0429971	0.99997	747.423	1410.75	738.096	1372.96
ENSMUSG00000035726.8	Supt16	cKO_vs_wt	0.00680028	0.964075	-0.105773	0.999978	-0.11724	0.99997	747.736	1323.45	749.939	1243.4
ENSMUSG00000008683.16	Rps15a	cKO_vs_wt	-0.103348	0.466739	0.12085	0.999978	0.220738	0.92838	743.653	218.53	691.049	239.836
ENSMUSG00000059070.16	Rpl18	cKO_vs_wt	-0.0464146	0.746593	-0.133483	0.999978	-0.0923041	0.99997	730.661	63.9326	706.515	59.1507
ENSMUSG00000040549.16	Ckap5	cKO_vs_wt	-0.0508165	0.658639	-0.105212	0.999978	-0.0587551	0.99997	740.1	955.765	713.153	898.42
ENSMUSG00000070544.6	Top1	cKO_vs_wt	0.0793689	0.374051	-0.0623649	0.999978	-0.146329	0.99997	736.787	896.185	776.88	868.211
ENSMUSG00000047945.6	Marcksl1	cKO_vs_wt	0.153214	0.0134842	0.15759	0.999978	0.000328039	0.99997	731.142	311.889	811.73	354.898
ENSMUSG00000001416.13	Cct3	cKO_vs_wt	-0.0139105	0.934448	-0.0317717	0.999978	-0.0216124	0.99997	728.688	1237.12	720.68	1224.56
ENSMUSG00000078812.10	Eif5a	cKO_vs_wt	0.015217	0.919442	0.069391	0.999978	0.0512184	0.99997	722.923	468.356	729.446	498.31
ENSMUSG00000041459.15	Tardbp	cKO_vs_wt	-0.0439145	0.735737	-0.0476885	0.999978	-0.00795326	0.99997	725.903	820.466	702.763	802.41
ENSMUSG00000025151.16	Maged1	cKO_vs_wt	0.0374047	0.75878	0.0594527	0.999978	0.0186093	0.99997	725.297	830.815	743.324	876.284
ENSMUSG00000033732.10	Sf3b3	cKO_vs_wt	-0.0357271	0.683115	-0.0792194	0.999978	-0.0478016	0.99997	723.117	764.097	704.421	731.777
ENSMUSG00000117338.1	Gm49804	cKO_vs_wt	0.0671974	0.640726	-0.0703881	0.999978	-0.143735	0.99997	676.892	69.9245	707.509	67.5065
ENSMUSG00000031715.14	Smarca5	cKO_vs_wt	0.0716216	0.494411	0.0216803	0.999978	-0.0547647	0.99997	716.247	173.597	751.322	178.536
ENSMUSG00000022961.18	Son	cKO_vs_wt	0.00381294	0.982153	0.00753383	0.999978	-5.18729e-05	0.99997	715.5	435.171	715.831	443.405
ENSMUSG00000061983.7	Rps12	cKO_vs_wt	-0.0855463	0.638328	0.0746654	0.999978	0.143513	0.99997	714.204	3.12034	671.797	3.33867
ENSMUSG00000029730.16	Mcm7	cKO_vs_wt	-0.0299209	0.783155	-0.083649	0.999978	-0.0571184	0.99997	710.712	479.519	694.973	457.329
ENSMUSG00000109324.2	Prmt1	cKO_vs_wt	-0.0344066	0.773691	0.0205457	0.999978	0.0517987	0.99997	707.106	1108.13	689.422	1135.69
ENSMUSG00000049775.16	Tmsb4x	cKO_vs_wt	-0.0762628	0.657298	-0.00574327	0.999978	0.0656261	0.99997	707.183	1443.5	669.439	1455.47
ENSMUSG00000020917.17	Acly	cKO_vs_wt	-0.0605626	0.44398	-0.0828757	0.999978	-0.025688	0.99997	705.36	881.264	675.29	843.129
ENSMUSG00000016319.3	Slc25a5	cKO_vs_wt	-0.0342693	0.81566	-0.0566693	0.999978	-0.0264066	0.99997	702.707	73.4481	685.081	70.9996
ENSMUSG00000030357.10	Fkbp4	cKO_vs_wt	0.0623775	0.505916	-0.0144858	0.999978	-0.0798029	0.99997	701.901	965.51	731.874	967.616
ENSMUSG00000027342.14	Pcna	cKO_vs_wt	-0.0498631	0.650722	-0.0650505	0.999978	-0.0190559	0.99997	673.927	592.943	649.939	572.77
ENSMUSG00000030738.11	Eif3c	cKO_vs_wt	-0.0235582	0.871881	-0.122496	0.999978	-0.103679	0.99997	698.818	918.341	686.117	853.622
ENSMUSG00000058600.13	Rpl30	cKO_vs_wt	-0.0990555	0.399478	-0.00870797	0.999978	0.0859851	0.99997	689.1	129.36	642.251	130.174
ENSMUSG00000047126.17	Cltc	cKO_vs_wt	-0.0427363	0.704218	-0.0388138	0.999978	0.000702447	0.99997	690.685	1549.2	669.538	1525.51
ENSMUSG00000029247.17	Paics	cKO_vs_wt	0.00260458	0.987466	0.0296666	0.999978	0.0232742	0.99997	684.309	600.336	684.509	620.376
ENSMUSG00000031328.15	Flna	cKO_vs_wt	-0.145057	0.174737	-0.175601	0.999978	-0.03381	0.99997	681.223	669.671	614.869	600.036
ENSMUSG00000011179.8	Odc1	cKO_vs_wt	0.080382	0.452633	-0.259145	0.999978	-0.347958	0.277818	674.771	27.1359	712.439	23.0474
ENSMUSG00000064354.1	mt-Co2	cKO_vs_wt	-0.0478445	0.961965	NA	NA	-0.0175717	0.99997	25.0417	0	24.1066	0
ENSMUSG00000037805.15	Rpl10a	cKO_vs_wt	-0.0890325	0.481707	-0.338487	0.999978	-0.251555	0.99997	611.982	1.48246	574.143	1.17678
ENSMUSG00000043962.16	Thrap3	cKO_vs_wt	0.0208475	0.882364	-0.0530474	0.999978	-0.0773264	0.99997	628.045	128.364	635.927	125.263
ENSMUSG00000046330.10	Rpl37a	cKO_vs_wt	-0.113139	0.454696	0.426508	0.999978	0.528634	0.205885	667.146	5.57393	615.556	7.66388
ENSMUSG00000058655.9	Eif4b	cKO_vs_wt	-0.0657923	0.424774	-0.11242	0.999978	-0.0495188	0.99997	668.986	568.493	637.953	531.965
ENSMUSG00000093930.2	Hmgcs1	cKO_vs_wt	-0.1492	0.0910621	-0.192192	0.999978	-0.0472191	0.99997	668.335	1410.63	601.991	1247.29
ENSMUSG00000020649.11	Rrm2	cKO_vs_wt	0.0191211	0.909008	-0.0346602	0.999978	-0.0581374	0.99997	667.064	1150.82	674.736	1134.49
ENSMUSG00000025967.16	Eef1b2	cKO_vs_wt	-0.0239864	0.892154	-0.0521243	0.999978	-0.0326344	0.99997	666.913	450.576	654.682	439.886
ENSMUSG00000034088.15	Hdlbp	cKO_vs_wt	-0.0694782	0.347104	-0.0671395	0.999978	-0.00189786	0.99997	661.013	526.584	628.898	508.238
ENSMUSG00000030435.16	U2af2	cKO_vs_wt	0.0262296	0.838847	-0.114506	0.999978	-0.145163	0.874918	659.763	331.916	670.537	311.132
ENSMUSG00000036550.16	Cnot1	cKO_vs_wt	-0.0699643	0.419048	-0.0178485	0.999978	0.0478839	0.99997	656.044	280.05	623.919	279.37
ENSMUSG00000028034.15	Fubp1	cKO_vs_wt	0.0524078	0.613456	0.00973123	0.999978	-0.0470942	0.99997	659.966	838.616	682.945	854.643
ENSMUSG00000024966.9	Stip1	cKO_vs_wt	-0.0644788	0.4956	-0.037687	0.999978	0.0227793	0.99997	659.132	922.405	629.279	910.186
ENSMUSG00000021218.10	Gdi2	cKO_vs_wt	0.0157039	0.928864	-0.107083	0.999978	-0.127508	0.991338	658.551	772.495	664.78	724.952
ENSMUSG00000030007.8	Cct7	cKO_vs_wt	-0.0257059	0.881355	0.0089232	0.999978	0.0308186	0.99997	650.26	764.145	637.911	776.822
ENSMUSG00000001270.9	Ckb	cKO_vs_wt	0.181774	0.0245633	0.0237241	0.999978	-0.16202	0.99997	649.315	1073.79	734.84	1106.86
ENSMUSG00000036752.4	Tubb4b	cKO_vs_wt	-0.00383361	0.983856	-0.0760112	0.999978	-0.0752035	0.99997	633.524	356.437	630.625	342.47
ENSMUSG00000029064.15	Gnb1	cKO_vs_wt	0.00343417	0.979315	-0.163727	0.999978	-0.170531	0.519145	647.151	834.545	647.875	754.833
ENSMUSG00000020361.13	Hspa4	cKO_vs_wt	0.017703	0.911944	-0.0507745	0.999978	-0.0726519	0.99997	644.881	936.364	651.827	913.869
ENSMUSG00000052146.16	Rps10	cKO_vs_wt	0.0709032	0.655023	0.182368	0.999978	0.104401	0.99997	594.136	18.942	622.542	21.8654
ENSMUSG00000051223.14	Bzw1	cKO_vs_wt	0.00223969	0.987164	0.0202149	0.999978	0.0132791	0.99997	636.735	341.225	636.888	350.04
ENSMUSG00000007564.15	Ppp2r1a	cKO_vs_wt	-0.0751405	0.270199	-0.0537536	0.999978	0.0174224	0.99997	634.1	1073.74	600.952	1046.73
ENSMUSG00000093674.7	Rpl41	cKO_vs_wt	-0.0908277	0.614401	-0.595962	0.999978	-0.512682	0.175422	632.019	11.2109	592.338	7.51637
ENSMUSG00000063316.13	Rpl27	cKO_vs_wt	-0.0428359	0.822483	0.331501	0.999978	0.382892	0.963082	598.626	1.8219	579.856	2.2809
ENSMUSG00000068882.13	Ssb	cKO_vs_wt	0.0574983	0.680939	-0.0248737	0.999978	-0.0868203	0.99997	630.596	801.879	654.871	796.936
ENSMUSG00000029169.11	Dhx15	cKO_vs_wt	0.0121087	0.941156	-0.0999922	0.999978	-0.115619	0.99997	629.81	746.745	633.976	704.915
ENSMUSG00000090733.6	Rps27	cKO_vs_wt	-0.122065	0.494736	-0.338733	0.999978	-0.218817	0.99997	625.054	0.17507	573.026	0.138813
ENSMUSG00000003660.10	Snrnp200	cKO_vs_wt	-0.166554	0.0334565	-0.180679	0.999978	-0.0184431	0.99997	620.847	955.379	552.163	852.534
ENSMUSG00000064363.1	mt-Nd4	cKO_vs_wt	0.150225	0.756002	0.0596098	0.999978	-0.0953808	0.99997	375.32	5.10531	414.921	5.30603
ENSMUSG00000020176.17	Grb10	cKO_vs_wt	-0.101501	0.213816	0.00241297	0.999978	0.099381	0.998538	618.916	1068.82	576.268	1084.41
ENSMUSG00000091228.1	Gm20390	cKO_vs_wt	-0.024803	0.886977	-0.0191857	0.999978	0.00247272	0.99997	614.716	630.45	603.274	631.19
ENSMUSG00000026355.11	Mcm6	cKO_vs_wt	0.0204293	0.881355	-0.0224729	0.999978	-0.0466495	0.99997	613.236	754.194	620.905	751.246
ENSMUSG00000028691.12	Prdx1	cKO_vs_wt	-0.00264625	0.987466	0.0748326	0.999978	0.0711702	0.99997	610.732	138.784	608.371	147.981
ENSMUSG00000015749.12	Anp32e	cKO_vs_wt	0.0470397	0.700245	-0.0828325	0.999978	-0.134458	0.99997	607.404	1482.51	626.232	1412.13
ENSMUSG00000003038.15	Hmgn2	cKO_vs_wt	0.00638771	0.97662	-0.128684	0.999978	-0.161903	0.99997	593.617	0.64974	594.764	0.616962
ENSMUSG00000034892.8	Rps29	cKO_vs_wt	-0.157813	0.335572	0.220219	0.999978	0.400168	0.99997	601.539	0.175251	537.954	0.208204
ENSMUSG00000006005.18	Tpr	cKO_vs_wt	0.00870088	0.964075	-0.0659825	0.999978	-0.0786367	0.99997	602.369	517.979	604.728	500.498
ENSMUSG00000036427.5	Gpi1	cKO_vs_wt	-0.0377158	0.783155	-0.0846379	0.999978	-0.0510853	0.99997	599.93	337.698	583.291	322.895
ENSMUSG00000025364.13	Pa2g4	cKO_vs_wt	-0.00183918	0.98932	-0.0456605	0.999978	-0.0477659	0.99997	599.781	609.586	598.053	596.657
ENSMUSG00000018379.17	Srsf1	cKO_vs_wt	0.0876587	0.305014	0.00676374	0.999978	-0.0844614	0.99997	597.637	1483.48	633.815	1511.77
ENSMUSG00000032481.17	Smarcc1	cKO_vs_wt	0.0255164	0.852622	-0.0477076	0.999978	-0.0778087	0.99997	598.049	632.823	607.524	618.987
ENSMUSG00000001228.14	Uhrf1	cKO_vs_wt	-0.0529997	0.581396	-0.0411579	0.999978	0.00840832	0.99997	594.717	522.511	572.423	514.022
ENSMUSG00000021377.15	Dek	cKO_vs_wt	0.032621	0.840735	-0.0565704	0.999978	-0.0931895	0.99997	594.184	612.834	606.684	594.351
ENSMUSG00000022185.19	Acin1	cKO_vs_wt	-0.0411182	0.620962	-0.110676	0.999978	-0.0727436	0.99997	590.406	500.386	572.85	469.692
ENSMUSG00000026074.15	Map4k4	cKO_vs_wt	0.0663675	0.588928	-0.0659177	0.999978	-0.13729	0.955265	588.74	321.635	615.87	310.516
ENSMUSG00000037563.15	Rps16	cKO_vs_wt	-0.0867924	0.618537	0.19257	0.999978	0.232997	0.99997	558.861	0.135784	525.395	0.164052
ENSMUSG00000090862.3	Rps13	cKO_vs_wt	-0.0175553	0.945241	0.00641954	0.999978	0.0245236	0.99997	577.187	0.311852	568.86	0.315084
ENSMUSG00000023150.14	Ivns1abp	cKO_vs_wt	0.0455637	0.659763	-0.0752146	0.999978	-0.126163	0.99997	584.045	342.856	601.908	328.73
ENSMUSG00000040945.13	Rcc2	cKO_vs_wt	-0.031021	0.794127	-0.0196299	0.999978	0.0071752	0.99997	584.444	843.963	571.09	842.961
ENSMUSG00000029687.16	Ezh2	cKO_vs_wt	0.00659421	0.971847	-0.0255808	0.999978	-0.0361931	0.99997	583.105	563.342	584.742	559.771
ENSMUSG00000018583.5	G3bp1	cKO_vs_wt	0.00662236	0.964075	0.00923712	0.999978	-0.00207559	0.99997	582.317	265.594	584.211	270.59
ENSMUSG00000005198.15	Polr2a	cKO_vs_wt	0.0101677	0.959151	-0.115508	0.999978	-0.127777	0.99997	580.743	333.457	584.121	311.694
ENSMUSG00000007739.10	Cct4	cKO_vs_wt	0.197772	0.000166242	0.00612466	0.999978	-0.19609	0.819953	579.798	1108.59	663.902	1124.71
ENSMUSG00000055065.7	Ddx17	cKO_vs_wt	-0.0521824	0.545284	-0.133138	0.999978	-0.0849194	0.99997	578.549	630.213	557.113	580.483
ENSMUSG00000019961.17	Tmpo	cKO_vs_wt	0.0287583	0.78672	-0.0297416	0.999978	-0.0621256	0.99997	571.434	966.118	582.106	957.327
ENSMUSG00000015217.11	Hmgb3	cKO_vs_wt	0.0486658	0.709093	-0.205398	0.999978	-0.27481	0.99997	527.015	2.58928	544.148	2.32511
ENSMUSG00000002748.7	Baz1b	cKO_vs_wt	-0.0476603	0.64228	-0.101812	0.999978	-0.0583994	0.99997	570.329	456.996	550.89	430.787
ENSMUSG00000037608.16	Bclaf1	cKO_vs_wt	0.0458663	0.705736	-0.0669328	0.999978	-0.116692	0.99997	567.104	461.588	584.376	445.676
ENSMUSG00000057406.16	Nsd2	cKO_vs_wt	-0.0135284	0.936063	-0.0567853	0.999978	-0.0480937	0.99997	568.531	316.941	562.586	307.957
ENSMUSG00000066037.14	Hnrnpr	cKO_vs_wt	0.0158158	0.911944	-0.080465	0.999978	-0.100594	0.99997	557.046	247.927	562.266	236.952
ENSMUSG00000031386.14	Hcfc1	cKO_vs_wt	-0.0790473	0.320165	-0.016109	0.999978	0.0583432	0.99997	566.41	292.304	535.545	293.248
ENSMUSG00000040385.7	Ppp1ca	cKO_vs_wt	-0.00152223	0.992401	0.00763094	0.999978	0.00552835	0.99997	560.944	999.491	559.441	1015.52
ENSMUSG00000021660.14	Btf3	cKO_vs_wt	0.0160896	0.923266	0.362599	0.999978	0.340566	0.99997	548.284	90.5701	553.407	118.505
ENSMUSG00000020929.14	Eftud2	cKO_vs_wt	-0.0503254	0.454253	-0.113781	0.999978	-0.0669592	0.99997	554.262	644.547	534.41	602.266
ENSMUSG00000026605.14	Cenpf	cKO_vs_wt	0.00164236	0.993664	-0.091929	0.999978	-0.100028	0.99997	551.642	550.151	551.214	521.394
ENSMUSG00000037487.7	Ubr5	cKO_vs_wt	0.105962	0.273391	-0.0966871	0.999978	-0.206883	0.504543	550.74	359.56	591.877	340.132
ENSMUSG00000056076.13	Eif3b	cKO_vs_wt	0.00181954	0.991165	-0.0269467	0.999978	-0.0322187	0.99997	546.437	735.076	546.209	732.138
ENSMUSG00000015937.15	H2afy	cKO_vs_wt	0.0115776	0.933434	-0.0601322	0.999978	-0.0759933	0.99997	544.391	815.662	547.993	790.057
ENSMUSG00000029472.13	Anapc5	cKO_vs_wt	0.122851	0.0207131	-0.00293704	0.999978	-0.130447	0.958845	541.18	191.678	588.401	193.871
ENSMUSG00000036438.14	Calm2	cKO_vs_wt	-0.0425898	0.766573	-0.100641	0.999978	-0.0619593	0.99997	541.057	365.444	524.318	346.009
ENSMUSG00000060636.14	Rpl35a	cKO_vs_wt	-0.0961317	0.429164	-0.239198	0.999978	-0.120877	0.99997	526.354	4.35573	491.486	3.64007
ENSMUSG00000071659.4	Hnrnpul2	cKO_vs_wt	0.0755805	0.239734	-0.0637784	0.999978	-0.144104	0.664383	540.254	471.41	568.303	456.658
ENSMUSG00000117694.1	Gm28285	cKO_vs_wt	0.0553702	0.695787	-0.130547	0.999978	-0.191271	0.99997	537.444	519.621	557.489	479.174
ENSMUSG00000020738.16	Sumo2	cKO_vs_wt	-0.0103961	0.946036	-0.866469	0.999978	-0.859907	0.808877	411.513	0.784149	407.902	0.445947
ENSMUSG00000007880.16	Arid1a	cKO_vs_wt	0.0155074	0.926116	-0.0815912	0.999978	-0.10102	0.99997	536.668	310.026	541.747	297.005
ENSMUSG00000041841.8	Rpl37	cKO_vs_wt	-0.149042	0.279296	0.43626	0.999978	0.582689	0.543403	526.696	75.9108	473.993	104.49
ENSMUSG00000040463.16	Mybbp1a	cKO_vs_wt	-0.0131299	0.935461	-0.0566409	0.999978	-0.0475481	0.99997	532.838	634.885	527.098	618.898
ENSMUSG00000064367.1	mt-Nd5	cKO_vs_wt	0.123288	0.803147	-0.365523	0.999978	-0.488348	0.99997	530.586	22.9361	576.209	17.7945
ENSMUSG00000028234.6	Rps20	cKO_vs_wt	-0.00758759	0.976307	-0.140429	0.999978	-0.156716	0.99997	527.03	11.3539	523.293	10.5834
ENSMUSG00000053877.12	Srcap	cKO_vs_wt	-0.0507804	0.764917	-0.0254431	0.999978	0.0207731	0.99997	529.53	156.994	510.598	156.377
ENSMUSG00000026219.14	Trip12	cKO_vs_wt	-0.0466092	0.770462	-0.0588343	0.999978	-0.0166591	0.99997	528.472	324.032	511.051	314.47
ENSMUSG00000026083.12	Eif5b	cKO_vs_wt	0.0959917	0.415494	-0.112859	0.999978	-0.213417	0.980438	528.015	334.946	563	313.374
ENSMUSG00000024359.10	Hspa9	cKO_vs_wt	0.00520845	0.977856	-0.0680854	0.999978	-0.0777903	0.99997	527.688	551.281	528.877	531.079
ENSMUSG00000005410.6	Mcm5	cKO_vs_wt	-0.0594553	0.561651	-0.0593216	0.999978	-0.00374636	0.99997	524.678	531.666	502.68	516.5
ENSMUSG00000107023.2	Gm42715	cKO_vs_wt	-0.050459	0.766573	-0.0347876	0.999978	0.0110551	0.99997	526.552	153.066	507.837	151.445
ENSMUSG00000006498.16	Ptbp1	cKO_vs_wt	-0.048206	0.620422	0.0116057	0.999978	0.0557416	0.99997	524.156	482.544	506.053	492.991
ENSMUSG00000029581.14	Fscn1	cKO_vs_wt	0.187989	5.83082e-05	0.0898221	0.999978	-0.10202	0.99997	523.75	1228.84	595.598	1325.45
ENSMUSG00000064358.1	mt-Co3	cKO_vs_wt	0.123213	0.881355	NA	NA	-0.187029	0.99997	15.1638	0	16.4368	0
ENSMUSG00000018707.13	Dync1h1	cKO_vs_wt	-0.0486625	0.853375	-0.0283182	0.999978	0.0178767	0.99997	521.174	339.82	502.933	338.398
ENSMUSG00000018474.17	Chd3	cKO_vs_wt	-0.0189788	0.923266	-0.152224	0.999978	-0.138122	0.980438	519.541	123.839	512.247	113
ENSMUSG00000074656.12	Eif2s2	cKO_vs_wt	0.0318435	0.832633	-0.0766422	0.999978	-0.114528	0.99997	502.542	92.9697	512.739	89.5147
ENSMUSG00000040952.16	Rps19	cKO_vs_wt	-0.14087	0.250866	0.23104	0.999978	0.366966	0.961581	510.721	175.851	462.514	210.399
ENSMUSG00000020680.15	Taf15	cKO_vs_wt	0.133695	0.106353	-0.105668	0.999978	-0.242029	0.864929	515.956	445.191	564.93	417.597
ENSMUSG00000079435.9	Rpl36a	cKO_vs_wt	-0.0791298	0.673501	0.205981	0.999978	0.28084	0.99997	508.187	3.1007	479.949	3.60706
ENSMUSG00000029836.15	Cbx3	cKO_vs_wt	0.0321637	0.802228	-0.179667	0.999978	-0.217948	0.99997	463.21	32.5965	472.834	29.3064
ENSMUSG00000024949.17	Sf1	cKO_vs_wt	0.18236	0.000850112	-0.0060985	0.999978	-0.192859	0.351726	509.513	547.096	576.98	552.248
ENSMUSG00000032423.12	Syncrip	cKO_vs_wt	0.0350313	0.782579	-0.0738181	0.999978	-0.113228	0.99997	505.811	420.871	517.245	403.994
ENSMUSG00000024974.10	Smc3	cKO_vs_wt	0.0467997	0.713435	-0.114674	0.999978	-0.166084	0.99997	505.431	467.278	521.019	436.144
ENSMUSG00000031167.16	Rbm3	cKO_vs_wt	0.00921025	0.956626	-0.0429431	0.999978	-0.0539892	0.99997	500.065	166.292	502.215	163.361
ENSMUSG00000076432.13	Ywhaq	cKO_vs_wt	0.210859	1.42288e-05	0.336244	0.999978	0.101312	0.99997	427.12	0.416198	493.379	0.531703
ENSMUSG00000022858.16	Tra2b	cKO_vs_wt	-0.0368883	0.750813	-0.237444	0.999978	-0.205994	0.965681	491.462	259.689	478.165	222.46
ENSMUSG00000037935.16	Smarce1	cKO_vs_wt	-0.0238049	0.869981	0.216784	0.999978	0.21243	0.99997	474.139	4.08463	465.698	4.90365
ENSMUSG00000041859.10	Mcm3	cKO_vs_wt	-0.0556723	0.58612	-0.0883989	0.999978	-0.0363089	0.99997	492.497	770.332	472.978	734.023
ENSMUSG00000019777.16	Hdac2	cKO_vs_wt	0.0803985	0.328382	-0.114328	0.999978	-0.198849	0.774081	491.547	635.626	518.894	593.087
ENSMUSG00000042520.16	Ubap2l	cKO_vs_wt	-0.0399074	0.638328	-0.0441737	0.999978	-0.00803916	0.99997	486.68	271.91	472.77	266.961
ENSMUSG00000040725.13	Hnrnpul1	cKO_vs_wt	0.0868745	0.18817	-0.0123372	0.999978	-0.103936	0.987147	487.44	254.973	516.812	255.931
ENSMUSG00000027620.16	Rbm39	cKO_vs_wt	0.0154745	0.923791	-0.0471745	0.999978	-0.067107	0.99997	487.432	705.521	491.65	689.607
ENSMUSG00000005732.14	Ranbp1	cKO_vs_wt	0.166628	0.0032055	-0.015816	0.999978	-0.187606	0.747019	484.988	730.268	543.336	732.153
ENSMUSG00000028809.16	Srrm1	cKO_vs_wt	-0.0789111	0.412668	-0.0798443	0.999978	-0.00457397	0.99997	483.445	282.217	456.911	270.933
ENSMUSG00000066357.6	Wdr6	cKO_vs_wt	-0.0685615	0.555934	-0.101388	0.999978	-0.0360432	0.99997	480.965	633.794	458.225	598.296
ENSMUSG00000028936.15	Rpl22	cKO_vs_wt	-0.0662904	0.683694	0.0276476	0.999978	0.0889967	0.99997	477.374	810.587	454.934	834.598
ENSMUSG00000063511.11	Snrnp70	cKO_vs_wt	0.0690138	0.667103	-0.199097	0.999978	-0.27102	0.309548	478.407	784.142	500.53	692.016
ENSMUSG00000026229.17	Psmd1	cKO_vs_wt	-0.0226177	0.876771	0.0269245	0.999978	0.0457817	0.99997	477.35	450.597	469.221	464.531
ENSMUSG00000040225.15	Prrc2c	cKO_vs_wt	-0.162087	0.202514	-0.127267	0.999978	0.0308506	0.99997	477.521	353.279	425.681	327.1
ENSMUSG00000035150.15	Eif2s3x	cKO_vs_wt	0.0124333	0.987124	-0.108714	0.999978	-0.127032	0.99997	427.969	14.9187	431.507	13.9525
ENSMUSG00000048758.14	Rpl29	cKO_vs_wt	-0.434101	0.451294	-0.517812	0.999978	-0.121639	0.99997	429.951	0.537569	316.463	0.395648
ENSMUSG00000032562.13	Gnai2	cKO_vs_wt	0.00183977	0.988125	0.0564554	0.999978	0.0511465	0.99997	474.999	564.653	474.956	594.948
ENSMUSG00000004455.16	Ppp1cc	cKO_vs_wt	0.0372408	0.711491	0.289676	0.999978	0.209425	0.99997	342.79	0.533863	351.195	0.673275
ENSMUSG00000041133.11	Smc1a	cKO_vs_wt	-0.139121	0.100597	-0.217982	0.999978	-0.082868	0.99997	473.238	487.478	429.12	423.508
ENSMUSG00000025132.13	Arhgdia	cKO_vs_wt	-0.124323	0.0216291	0.0794236	0.999978	0.200042	0.497588	472.796	978.06	433.061	1046.9
ENSMUSG00000026553.17	Copa	cKO_vs_wt	-0.0511545	0.531978	-0.123889	0.999978	-0.0766508	0.99997	471.945	552.815	454.771	513.1
ENSMUSG00000067288.13	Rps28	cKO_vs_wt	-0.134517	0.316179	0.28738	0.999978	0.349843	0.99997	467.044	0.443041	424.553	0.565647
ENSMUSG00000029328.15	Hnrnpdl	cKO_vs_wt	0.149752	0.136024	-0.0265009	0.999978	-0.181084	0.948314	469.133	645.518	519.527	640.269
ENSMUSG00000066232.4	Ipo7	cKO_vs_wt	0.0424323	0.773452	-0.00692446	0.999978	-0.0534968	0.99997	468.542	698.021	481.483	702.12
ENSMUSG00000021134.17	Srsf5	cKO_vs_wt	0.0813357	0.410298	-0.015274	0.999978	-0.100796	0.99997	463.055	121.599	489.356	121.581
ENSMUSG00000038274.13	Fau	cKO_vs_wt	-0.0825124	0.568723	0.58694	0.999978	0.659767	0.723312	440.329	2.14946	415.027	3.31601
ENSMUSG00000001016.12	Ilf2	cKO_vs_wt	-0.00201889	0.98887	-0.0421	0.999978	-0.0442457	0.99997	465.878	553.433	464.368	543.36
ENSMUSG00000022314.10	Rad21	cKO_vs_wt	0.0375879	0.753351	-0.00366803	0.999978	-0.0453751	0.99997	464.524	498.766	476.072	503.599
ENSMUSG00000025508.13	Rplp2	cKO_vs_wt	0.0195684	0.921808	0.224115	0.999978	0.20185	0.987168	462.712	190.885	468.114	225.138
ENSMUSG00000021282.17	Eif5	cKO_vs_wt	0.117815	0.0593663	0.00079178	0.999978	-0.121974	0.99997	464.184	215.521	502.903	217.705
ENSMUSG00000021178.9	Psmc1	cKO_vs_wt	-0.0417908	0.735071	-0.00945225	0.999978	0.0271728	0.99997	463.65	302.975	449.597	304.631
ENSMUSG00000028134.11	Ptbp2	cKO_vs_wt	-0.0112842	0.955118	-0.0161175	0.999978	-0.00902989	0.99997	462.959	565.321	458.624	565.615
ENSMUSG00000061904.12	Slc25a3	cKO_vs_wt	0.0967509	0.155036	-0.0138846	0.999978	-0.114876	0.99997	460.689	758.167	491.83	758.238
ENSMUSG00000000740.12	Rpl13	cKO_vs_wt	0.525311	0.00517081	-0.0979153	0.999978	-0.638374	0.808877	429.743	1.78512	617.36	1.71637
ENSMUSG00000030057.15	Cnbp	cKO_vs_wt	-0.0243798	0.878931	0.0342781	0.999978	0.0567514	0.99997	455.403	1185.83	447.308	1230.06
ENSMUSG00000002718.14	Cse1l	cKO_vs_wt	0.0161033	0.922207	0.0735862	0.999978	0.0532826	0.99997	457.679	574.547	461.916	611.918
ENSMUSG00000002870.8	Mcm2	cKO_vs_wt	-0.00274043	0.987279	-0.0252213	0.999978	-0.0259813	0.99997	457.808	652.689	456.217	650.245
ENSMUSG00000024097.11	Srsf7	cKO_vs_wt	-0.0221836	0.882134	-0.0245886	0.999978	-0.00580889	0.99997	456.952	804.176	449.386	800.438
ENSMUSG00000022191.16	Drosha	cKO_vs_wt	0.0245614	0.854049	0.0162294	0.999978	-0.0129377	0.99997	456.023	183.677	463.314	188.009
ENSMUSG00000020114.12	Cand1	cKO_vs_wt	0.0260905	0.822392	0.00341675	0.999978	-0.0260948	0.99997	455.217	757.267	462.751	768.85
ENSMUSG00000010608.15	Rbm25	cKO_vs_wt	-0.0413689	0.795939	-0.206276	0.999978	-0.168891	0.99997	453.036	378.338	439.125	331.697
ENSMUSG00000056394.17	Lig1	cKO_vs_wt	-0.0426959	0.710911	-0.0657476	0.999978	-0.0267459	0.99997	452.621	406.263	438.984	392.592
ENSMUSG00000031948.14	Kars	cKO_vs_wt	-0.0344766	0.778384	0.0404119	0.999978	0.0712006	0.99997	452.141	368.059	440.698	382.878
ENSMUSG00000018501.17	Ncor1	cKO_vs_wt	0.0080431	0.965572	-0.0332255	0.999978	-0.04616	0.99997	450.192	146.434	452.083	144.786
ENSMUSG00000031010.17	Usp9x	cKO_vs_wt	-0.00329393	0.987466	0.0741521	0.999978	0.0737202	0.99997	432.544	392.949	430.721	418.706
ENSMUSG00000040850.17	Psme4	cKO_vs_wt	-0.00322672	0.98646	0.00967373	0.999978	0.00918865	0.99997	448.119	252.15	446.359	257.052
ENSMUSG00000022673.5	Mcm4	cKO_vs_wt	0.0274941	0.83996	0.022799	0.999978	-0.00842866	0.99997	447.491	562.783	455.231	578.436
ENSMUSG00000027469.16	Tpx2	cKO_vs_wt	-0.0536329	0.564017	-0.129282	0.999978	-0.0800624	0.99997	445.96	438.706	428.959	405.464
ENSMUSG00000051695.6	Pcbp1	cKO_vs_wt	0.381717	4.31168e-24	0.000920673	0.999978	-0.384695	0.00252327	445.567	898.092	579.408	912.246
ENSMUSG00000039001.12	Rps21	cKO_vs_wt	-0.127641	0.499123	0.214785	0.999978	0.337538	0.810237	445.519	189.304	406.848	223.276
ENSMUSG00000026615.14	Eprs	cKO_vs_wt	0.0232123	0.859226	-0.0464396	0.999978	-0.0726553	0.99997	443.596	438.489	449.993	429.497
ENSMUSG00000041740.16	Rnf10	cKO_vs_wt	0.0126623	0.940248	0.121788	0.999978	0.102933	0.99997	443.212	61.1366	446.69	67.7654
ENSMUSG00000040731.13	Eif4h	cKO_vs_wt	-0.00311587	0.98004	-0.0136427	0.999978	-0.0149006	0.99997	442.306	829.405	440.697	830.715
ENSMUSG00000021957.7	Tkt	cKO_vs_wt	0.00614821	0.968314	-0.048674	0.999978	-0.0578934	0.99997	439.836	659.403	441.026	645.259
ENSMUSG00000024392.17	Bag6	cKO_vs_wt	0.0741009	0.450897	-0.00638019	0.999978	-0.0847642	0.99997	439.247	381.377	461.594	385.392
ENSMUSG00000013629.16	Cad	cKO_vs_wt	-0.00986529	0.945766	-0.0745565	0.999978	-0.0685207	0.99997	437.664	650.135	433.97	626.022
ENSMUSG00000024735.13	Prpf19	cKO_vs_wt	-0.0128871	0.911944	0.0429538	0.999978	0.0513782	0.99997	437.489	554.373	432.87	577.634
ENSMUSG00000037149.10	Ddx1	cKO_vs_wt	0.0343215	0.757898	-0.0550166	0.999978	-0.0942574	0.99997	437.198	798.812	446.835	777.047
ENSMUSG00000014355.10	Anapc1	cKO_vs_wt	-0.0518715	0.659829	-0.0390144	0.999978	0.00904327	0.99997	436.243	346.938	420.298	341.238
ENSMUSG00000020349.4	Ppp2ca	cKO_vs_wt	0.00556769	0.964075	-0.0537739	0.999978	-0.0629703	0.99997	436.263	789.68	437.301	769.502
ENSMUSG00000022336.3	Eif3e	cKO_vs_wt	0.00763236	0.965572	0.0542943	0.999978	0.0425241	0.99997	435.359	178.811	436.883	188.254
ENSMUSG00000029623.14	Pdap1	cKO_vs_wt	0.0169249	0.931619	-0.000830672	0.999978	-0.0213821	0.99997	433.983	553.289	438.148	559.482
ENSMUSG00000064345.1	mt-Nd2	cKO_vs_wt	0.196391	0.604581	-0.251719	0.999978	-0.44864	0.99997	432.035	11.0255	493.303	9.27345
ENSMUSG00000020074.7	Ccar1	cKO_vs_wt	-0.00990047	0.959239	-0.0727538	0.999978	-0.0672051	0.99997	431.183	272.962	427.261	262.147
ENSMUSG00000035242.15	Oaz1	cKO_vs_wt	-0.0798826	0.4956	-0.00927012	0.999978	0.0621574	0.99997	380.557	24.7101	359.546	25.0675
ENSMUSG00000036309.14	Skp1a	cKO_vs_wt	0.0102381	0.952544	-0.0227668	0.999978	-0.0375159	0.99997	429.706	1232.85	431.919	1222.06
ENSMUSG00000028790.13	Khdrbs1	cKO_vs_wt	0.0511552	0.424934	-0.0910026	0.999978	-0.14684	0.69616	430.267	983.073	445.02	934.255
ENSMUSG00000017421.18	Zfp207	cKO_vs_wt	-0.021804	0.877263	-0.100205	0.999978	-0.0830978	0.99997	429.35	394.513	422.022	373.087
ENSMUSG00000022841.15	Ap2m1	cKO_vs_wt	-0.0627557	0.4583	0.150365	0.999978	0.194902	0.973001	386.896	18.6261	369.933	21.1527
ENSMUSG00000031422.16	Morf4l2	cKO_vs_wt	0.0100065	0.945766	0.0204883	0.999978	0.00572626	0.99997	424.682	170.621	427.168	175.296
ENSMUSG00000037815.7	Ctnna1	cKO_vs_wt	-0.0599816	0.384748	-0.107817	0.999978	-0.0516929	0.99997	425.689	655.875	407.777	615.581
ENSMUSG00000096210.2	H1f0	cKO_vs_wt	0.0801871	0.322787	0.157795	0.999978	0.0739872	0.99997	426.673	294.433	450.733	332.816
ENSMUSG00000032178.14	Ilf3	cKO_vs_wt	-0.0530961	0.557172	-0.0422665	0.999978	0.00668658	0.99997	423.987	367.664	408.198	361.527
ENSMUSG00000058013.11	2022-09-11	cKO_vs_wt	0.00197421	0.991165	0.00702026	0.999978	0.00065295	0.99997	423.891	624.945	423.715	634.586
ENSMUSG00000062867.13	Impdh2	cKO_vs_wt	0.0345839	0.767778	0.250453	0.999978	0.205928	0.891189	409.426	14.5679	418.614	17.6386
ENSMUSG00000021111.15	Papola	cKO_vs_wt	0.0587429	0.534515	-0.0519393	0.999978	-0.116415	0.99997	420.69	107.277	437.523	104.825
ENSMUSG00000035530.13	Eif1	cKO_vs_wt	0.249086	1.565e-06	0.109134	0.999978	-0.140442	0.99997	410.514	31.9091	486.974	34.6359
ENSMUSG00000022710.17	Usp7	cKO_vs_wt	0.0799113	0.339611	-0.0228151	0.999978	-0.107127	0.99997	415.524	237.518	438.441	236.304
ENSMUSG00000029657.15	Hsph1	cKO_vs_wt	0.0511439	0.664077	-0.0427075	0.999978	-0.0979961	0.99997	414.215	560.701	428.507	549.969
ENSMUSG00000028426.10	Rad23b	cKO_vs_wt	-0.00539478	0.97424	-0.00593005	0.999978	-0.00372271	0.99997	413.557	643.143	411.279	648.705
ENSMUSG00000020857.11	Nme2	cKO_vs_wt	0.00379451	0.985547	0.0931262	0.999978	0.0875005	0.99997	411.152	234.845	411.588	255.178
ENSMUSG00000066306.13	Numa1	cKO_vs_wt	-0.0668751	0.43776	-0.0293401	0.999978	0.0331858	0.99997	409.197	334.074	390.021	332.087
ENSMUSG00000020290.14	Xpo1	cKO_vs_wt	0.026088	0.883484	-0.0384066	0.999978	-0.0679064	0.99997	407.529	429.344	414.183	422.61
ENSMUSG00000051149.15	Adnp	cKO_vs_wt	0.000505417	0.99746	0.00714162	0.999978	0.00292216	0.99997	407.124	213.26	406.86	216.473
ENSMUSG00000037373.12	Ctbp1	cKO_vs_wt	-0.00999887	0.947905	0.0185971	0.999978	0.0249837	0.99997	406.336	204.454	403.091	210.01
ENSMUSG00000022403.15	St13	cKO_vs_wt	0.0259511	0.848241	-0.114344	0.999978	-0.145244	0.990938	404.501	516.07	411.1	481.735
ENSMUSG00000005417.17	Mprip	cKO_vs_wt	-0.0246259	0.870577	0.0032629	0.999978	0.0220372	0.99997	396.599	88.4227	389.429	89.861
ENSMUSG00000071547.4	Nt5dc2	cKO_vs_wt	0.0436069	0.757327	-0.144773	0.999978	-0.191275	0.808877	403.39	283.228	415.285	259.542
ENSMUSG00000070713.5	Gm10282	cKO_vs_wt	-0.11304	0.445207	NA	NA	0.0518495	0.99997	289.495	0	267.361	0
ENSMUSG00000020277.10	Pfkl	cKO_vs_wt	-0.0577186	0.653724	-0.0662857	0.999978	-0.0122962	0.99997	401.119	517.509	384.579	500.721
ENSMUSG00000041235.12	Chd7	cKO_vs_wt	0.0135846	0.957842	-0.0534388	0.999978	-0.0712825	0.99997	400.051	183.125	403.087	178.367
ENSMUSG00000046711.16	Hmga1	cKO_vs_wt	0.00836364	0.97424	-0.235086	0.999978	-0.24241	0.99997	332.733	8.64868	334.164	7.37482
ENSMUSG00000043909.16	Trp53bp1	cKO_vs_wt	-0.0257765	0.811668	0.108808	0.999978	0.131251	0.99997	399.748	342.481	392.118	374.719
ENSMUSG00000002102.15	Psmc3	cKO_vs_wt	-0.0713207	0.429184	-0.0944389	0.999978	-0.0272722	0.99997	399.703	468.507	379.666	443.765
ENSMUSG00000031633.4	Slc25a4	cKO_vs_wt	0.0955805	0.110744	-0.012415	0.999978	-0.11233	0.832427	398.751	845.15	425.35	847.598
ENSMUSG00000037364.12	Srrt	cKO_vs_wt	-0.0370095	0.723828	-0.109725	0.999978	-0.0763207	0.99997	397.039	372.529	386.26	349.268
ENSMUSG00000020949.9	Fkbp3	cKO_vs_wt	0.0501913	0.722276	0.0727974	0.999978	0.0187478	0.99997	397.178	806.649	410.434	855.13
ENSMUSG00000036112.15	Metap2	cKO_vs_wt	0.0370392	0.797748	-0.0813099	0.999978	-0.122062	0.99997	396.013	218.89	405.534	208.573
ENSMUSG00000028560.11	Usp1	cKO_vs_wt	0.0939422	0.188092	0.0306991	0.999978	-0.0667573	0.99997	386.417	106.63	411.816	109.911
ENSMUSG00000031353.13	Rbbp7	cKO_vs_wt	0.0236343	0.856273	-0.0959425	0.999978	-0.123567	0.99997	391.684	399.25	397.536	376.755
ENSMUSG00000029250.5	Polr2b	cKO_vs_wt	-0.00422159	0.976648	-0.0401166	0.999978	-0.0405787	0.99997	390.525	393.937	388.645	387.891
ENSMUSG00000040481.17	Bptf	cKO_vs_wt	0.0131676	0.960079	-0.0880172	0.999978	-0.10706	0.99997	387.211	146.612	390.009	139.578
ENSMUSG00000060206.11	Zfp462	cKO_vs_wt	-0.0473418	0.8084	-0.0075106	0.999978	0.0345103	0.99997	387.148	280.649	374.162	282.475
ENSMUSG00000018293.4	Pfn1	cKO_vs_wt	0.13611	0.00922482	0.083039	0.999978	-0.055248	0.99997	386.112	1415.9	423.692	1520.29
ENSMUSG00000041431.16	Ccnb1	cKO_vs_wt	-0.107182	0.173242	-0.0282261	0.999978	0.0741202	0.99997	378.795	65.1042	351.177	64.4906
ENSMUSG00000029686.15	Cul1	cKO_vs_wt	0.053606	0.64767	-0.0592407	0.999978	-0.117599	0.99997	386.202	231.829	400.1	224.73
ENSMUSG00000059119.9	Nap1l4	cKO_vs_wt	-0.0567836	0.553651	-0.0724331	0.999978	-0.0204673	0.99997	384.281	562.419	368.709	540.336
ENSMUSG00000000247.11	Lhx2	cKO_vs_wt	0.2497	0.00832877	0.0686948	0.999978	-0.183989	0.99997	384.386	186.997	455.829	198.84
ENSMUSG00000032555.10	Topbp1	cKO_vs_wt	0.0361851	0.739671	-0.257795	0.999978	-0.29899	0.0441709	382.87	145.422	391.838	122.883
ENSMUSG00000024335.20	Brd2	cKO_vs_wt	-0.0396441	0.708578	-0.084409	0.999978	-0.0468125	0.99997	382.64	130.616	371.987	124.352
ENSMUSG00000012443.4	Kif11	cKO_vs_wt	0.000579744	0.99725	-0.0725321	0.999978	-0.0773563	0.99997	382.015	465.256	381.484	447.426
ENSMUSG00000016554.9	Eif3d	cKO_vs_wt	-0.0448776	0.697111	-0.0506703	0.999978	-0.00902261	0.99997	381.392	518.765	369.066	506.827
ENSMUSG00000016541.10	Atxn10	cKO_vs_wt	0.0987174	0.216858	-0.034094	0.999978	-0.137552	0.99997	381.129	971.007	407.453	957.987
ENSMUSG00000027940.18	Tpm3	cKO_vs_wt	-0.0151361	0.924868	-0.424248	0.999978	-0.413778	0.198031	379.201	195.503	374.605	147.711
ENSMUSG00000000563.17	Atp5f1	cKO_vs_wt	0.0411251	0.674194	0.011003	0.999978	-0.0343339	0.99997	379.46	217.613	389.674	221.662
ENSMUSG00000002129.11	Sf3a1	cKO_vs_wt	0.0410534	0.723682	-0.108313	0.999978	-0.15376	0.805202	379.55	317.768	389.759	298.243
ENSMUSG00000041879.13	Ipo9	cKO_vs_wt	-0.0625798	0.463241	-0.00776857	0.999978	0.0511822	0.99997	379.322	470.169	362.773	473.801
ENSMUSG00000022312.11	Eif3h	cKO_vs_wt	0.0501981	0.681445	-0.0625226	0.999978	-0.117655	0.962834	375.056	272.822	387.552	264.204
ENSMUSG00000071054.12	Safb	cKO_vs_wt	0.102805	0.234098	-0.0999491	0.999978	-0.206293	0.533901	368.141	546.012	394.421	516.675
ENSMUSG00000045482.16	Trrap	cKO_vs_wt	-0.0896187	0.514497	0.0257892	0.999978	0.110866	0.99997	375.055	284.671	351.919	294.095
ENSMUSG00000032458.6	Copb2	cKO_vs_wt	-0.0241648	0.857899	-0.0499278	0.999978	-0.0295601	0.99997	376.436	462.551	369.534	452.061
ENSMUSG00000021318.15	Gli3	cKO_vs_wt	-0.0413195	0.802957	-0.0710066	0.999978	-0.0351005	0.99997	375.606	215.217	364.261	207.125
ENSMUSG00000026020.9	Nop58	cKO_vs_wt	0.129748	0.149833	-0.00416504	0.999978	-0.138022	0.99997	368.708	562.61	402.561	566.347
ENSMUSG00000029202.12	Pds5a	cKO_vs_wt	0.0643674	0.544577	-0.076611	0.999978	-0.146173	0.957276	373.602	199.754	390.092	191.416
ENSMUSG00000027288.16	Zfp106	cKO_vs_wt	0.0533043	0.70582	-0.0571478	0.999978	-0.115422	0.99997	372.975	122.569	386.657	119.148
ENSMUSG00000037851.13	Iars	cKO_vs_wt	0.00827647	0.952544	0.00938943	0.999978	-0.00207254	0.99997	368.454	292.325	369.953	297.685
ENSMUSG00000027002.13	Nckap1	cKO_vs_wt	0.023439	0.872815	0.0127093	0.999978	-0.0142898	0.99997	369.402	249.487	374.9	254.084
ENSMUSG00000005683.8	Cs	cKO_vs_wt	-0.0245131	0.815121	-0.0255881	0.999978	-0.005546	0.99997	369.267	459.919	362.528	456.357
ENSMUSG00000031592.10	Pcm1	cKO_vs_wt	0.0153015	0.939191	-0.085951	0.999978	-0.106326	0.99997	369.05	306.772	372.347	292.091
ENSMUSG00000045328.11	Cenpe	cKO_vs_wt	-0.0277857	0.866948	-0.11949	0.999978	-0.0970767	0.99997	368.327	340.879	360.473	317.023
ENSMUSG00000052997.15	Uba2	cKO_vs_wt	0.0459354	0.673653	-0.000606852	0.999978	-0.0504393	0.99997	367.933	565.991	379.144	571.627
ENSMUSG00000090841.2	Myl6	cKO_vs_wt	-0.0915495	0.465779	0.0896242	0.999978	0.173629	0.99997	362.124	74.8549	339.251	80.568
ENSMUSG00000039262.16	Prrc2b	cKO_vs_wt	-0.0470554	0.779439	-0.00432631	0.999978	0.0383897	0.99997	365.257	123.979	353.108	125.029
ENSMUSG00000040084.9	Bub1b	cKO_vs_wt	-0.0548547	0.512866	-0.0570489	0.999978	-0.00580192	0.99997	364.346	348.518	350.183	338.938
ENSMUSG00000027593.15	Raly	cKO_vs_wt	0.20864	3.71231e-06	-0.133532	0.999978	-0.34728	0.0035798	364.417	652.409	420.419	601.986
ENSMUSG00000007815.13	Rhoa	cKO_vs_wt	-0.0107604	0.925055	-0.108628	0.999978	-0.10036	0.99997	360.512	205.337	357.29	192.337
ENSMUSG00000022391.16	Rangap1	cKO_vs_wt	-0.0414112	0.677738	-0.163256	0.999978	-0.125659	0.992384	363.97	692.178	353.187	624.77
ENSMUSG00000014195.15	Dnajc7	cKO_vs_wt	-0.0503486	0.600954	-0.127883	0.999978	-0.0815218	0.99997	362.993	520.516	349.94	481.549
ENSMUSG00000045962.16	Wnk1	cKO_vs_wt	0.0250559	0.906963	0.142751	0.999978	0.11213	0.99997	362.097	115.882	367.893	129.817
ENSMUSG00000057738.13	Sptan1	cKO_vs_wt	-0.013932	0.955575	-0.0162532	0.999978	-0.00617778	0.99997	362.198	538.802	358.174	538.647
ENSMUSG00000033047.5	Eif3l	cKO_vs_wt	-0.0388628	0.764698	0.0116811	0.999978	0.0465922	0.99997	361.432	596.75	351.22	608.423
ENSMUSG00000006699.17	Cdc42	cKO_vs_wt	-0.0394426	0.683694	-0.0656573	0.999978	-0.0298543	0.99997	360.439	186.028	350.077	179.485
ENSMUSG00000024661.7	Fth1	cKO_vs_wt	0.173077	0.136067	-0.0123512	0.999978	-0.191999	0.99997	359.175	177.488	404.091	178.876
ENSMUSG00000028692.14	Akr1a1	cKO_vs_wt	-0.0295215	0.822999	-0.116244	0.999978	-0.0899987	0.99997	358.334	397.109	350.587	370.191
ENSMUSG00000020737.12	Jpt1	cKO_vs_wt	-0.0505251	0.669849	0.135585	0.999978	0.183014	0.99997	356.787	94.3862	343.995	105.482
ENSMUSG00000079641.3	Rpl39	cKO_vs_wt	-0.038712	0.882364	-0.341463	0.999978	-0.301568	0.99997	355.688	0.195517	345.546	0.163058
ENSMUSG00000023015.14	Racgap1	cKO_vs_wt	-0.0481651	0.629331	-0.00891826	0.999978	0.0355943	0.99997	357.743	408.741	345.573	411.285
ENSMUSG00000059263.9	Usp47	cKO_vs_wt	0.00649228	0.965572	-0.00700443	0.999978	-0.0174988	0.99997	357.49	336.076	358.623	337.872
ENSMUSG00000027012.15	Dync1i2	cKO_vs_wt	-0.0378404	0.712299	-0.0154203	0.999978	0.0181773	0.99997	356.177	459.612	346.461	459.654
ENSMUSG00000002477.5	Snrpd1	cKO_vs_wt	0.0653017	0.592722	-0.227081	0.999978	-0.295826	0.339921	356.06	373.026	371.812	321.66
ENSMUSG00000021488.8	Nsd1	cKO_vs_wt	-0.0381617	0.879752	-0.0933426	0.999978	-0.060613	0.99997	354.331	216.319	344.714	204.902
ENSMUSG00000032199.13	Polr2m	cKO_vs_wt	-0.0158123	0.919442	0.190196	0.999978	0.202916	0.964787	355.16	147.865	350.869	171.234
ENSMUSG00000034681.17	Rnps1	cKO_vs_wt	0.0371483	0.782659	0.201098	0.999978	0.158244	0.92838	344.915	50.051	353.313	58.3637
ENSMUSG00000021832.8	Psmc6	cKO_vs_wt	-0.0156873	0.920283	-0.0202907	0.999978	-0.00890136	0.99997	353.701	498.621	349.273	496.307
ENSMUSG00000005370.4	Msh6	cKO_vs_wt	0.0358982	0.748212	-0.0159242	0.999978	-0.0554343	0.99997	353.291	325.791	361.683	325.726
ENSMUSG00000033228.8	Scaf11	cKO_vs_wt	0.072464	0.419929	-0.0113272	0.999978	-0.0875577	0.99997	351.909	210.922	369.562	211.824
ENSMUSG00000020863.15	Luc7l3	cKO_vs_wt	-0.00690991	0.975447	-0.124145	0.999978	-0.121445	0.99997	350.934	537.147	348.354	498.359
ENSMUSG00000030796.17	Tead2	cKO_vs_wt	0.19349	0.000697644	0.0308724	0.999978	-0.166633	0.983515	349.132	197.86	398.766	205.183
ENSMUSG00000016921.14	Srsf6	cKO_vs_wt	0.233571	3.47069e-09	-0.0223089	0.999978	-0.260049	0.0241533	350.929	756.528	412.13	754.475
ENSMUSG00000020321.15	Mdh1	cKO_vs_wt	-0.0364373	0.726991	-0.0684784	0.999978	-0.0360415	0.99997	348.264	633.064	339.042	610.049
ENSMUSG00000037070.10	Rbmxl1	cKO_vs_wt	0.00640284	0.969155	-0.621019	0.999978	-0.614474	0.532738	260.841	2.0917	261.546	1.34239
ENSMUSG00000032959.12	Pebp1	cKO_vs_wt	0.252084	4.52913e-06	0.655939	0.999978	0.398106	0.99997	338.352	18.6668	402.141	30.1552
ENSMUSG00000054256.11	Msi1	cKO_vs_wt	0.152409	0.0108815	0.0271936	0.999978	-0.13001	0.980438	346.814	566.543	384.572	585.869
ENSMUSG00000007029.16	Vars	cKO_vs_wt	0.0314074	0.844103	0.000203241	0.999978	-0.0348678	0.99997	346.846	396.529	353.817	401.94
ENSMUSG00000028312.19	Smc2	cKO_vs_wt	-0.0439832	0.750813	-0.080397	0.999978	-0.040478	0.99997	346.353	313.397	335.305	299.345
ENSMUSG00000022982.10	Sod1	cKO_vs_wt	-0.0521332	0.708578	-0.139736	0.999978	-0.0900912	0.99997	346.502	335.797	333.456	309.073
ENSMUSG00000004897.16	Hdgf	cKO_vs_wt	0.0310838	0.813784	-0.0311173	0.999978	-0.065666	0.99997	344.748	272.8	351.645	271.204
ENSMUSG00000011752.7	Pgam1	cKO_vs_wt	0.335526	3.93483e-09	-1.18249	0.999978	-1.54768	0.99997	189.249	0.112094	238.172	0.0438213
ENSMUSG00000036940.15	Kdm1a	cKO_vs_wt	0.013207	0.919442	-0.0875404	0.999978	-0.104771	0.99997	344.171	336.152	346.756	320.235
ENSMUSG00000026750.6	Psmb7	cKO_vs_wt	-0.0386923	0.746593	-0.0382454	0.999978	-0.00349673	0.99997	342.749	508.956	333.186	501.346
ENSMUSG00000026434.12	Nucks1	cKO_vs_wt	-0.0543384	0.559831	-0.0728762	0.999978	-0.0237977	0.99997	341.597	485.624	328.439	467.309
ENSMUSG00000003435.9	Supt5	cKO_vs_wt	-0.0700542	0.431022	-0.106089	0.999978	-0.0392972	0.99997	341.836	263.868	324.969	248.117
ENSMUSG00000029777.10	Gars	cKO_vs_wt	0.0465469	0.645537	0.0111639	0.999978	-0.039412	0.99997	342.101	580.989	352.677	592.198
ENSMUSG00000020075.8	Ddx21	cKO_vs_wt	-0.0389224	0.730805	-0.021748	0.999978	0.0135814	0.99997	341.328	330.032	331.696	329.006
ENSMUSG00000025066.10	Sfr1	cKO_vs_wt	0.0408222	0.795608	0.0504859	0.999978	0.00504234	0.99997	339.122	418.625	348.079	439.241
ENSMUSG00000020086.6	H2afy2	cKO_vs_wt	0.00615182	0.966604	-0.0139023	0.999978	-0.0239906	0.99997	339.099	353.478	340.256	353.933
ENSMUSG00000055762.16	Eef1d	cKO_vs_wt	0.010562	0.959665	-0.0408415	0.999978	-0.0552197	0.99997	339.36	421.545	341.075	414.733
ENSMUSG00000053510.12	Nrd1	cKO_vs_wt	0.00513964	0.96917	-0.041497	0.999978	-0.0513096	0.99997	338.945	304.908	339.718	299.075
ENSMUSG00000027715.9	Ccna2	cKO_vs_wt	0.0654294	0.357154	-0.0288785	0.999978	-0.0982351	0.99997	338.464	393.636	353.599	390.921
ENSMUSG00000061607.15	Mdc1	cKO_vs_wt	-0.0576178	0.521609	-0.0280178	0.999978	0.0257058	0.99997	338.371	292.157	324.643	290.919
ENSMUSG00000021131.14	Erh	cKO_vs_wt	-0.00483134	0.982635	0.125647	0.999978	0.0814287	0.99997	320.185	2.42217	318.581	2.77129
ENSMUSG00000023118.15	Sympk	cKO_vs_wt	0.00474379	0.979385	0.119825	0.999978	0.111542	0.99997	337.852	246.856	338.606	272.379
ENSMUSG00000064356.3	mt-Atp8	cKO_vs_wt	0.33587	0.665172	NA	NA	-0.39897	0.99997	8.8788	0	11.1463	0
ENSMUSG00000020594.14	Pum2	cKO_vs_wt	-0.00119295	0.995701	0.00686986	0.999978	0.00406051	0.99997	336.463	311.662	335.664	316.901
ENSMUSG00000001833.17	2022-09-07	cKO_vs_wt	-0.0459529	0.706926	-0.0271866	0.999978	0.0142976	0.99997	336.115	531.621	324.969	526.85
ENSMUSG00000020250.10	Txnrd1	cKO_vs_wt	-0.0284067	0.842803	0.000555204	0.999978	0.0257834	0.99997	335.444	435.113	328.417	440.935
ENSMUSG00000018666.13	Cbx1	cKO_vs_wt	0.0561351	0.548172	-0.109168	0.999978	-0.17004	0.810237	335.153	413.652	347.926	387.016
ENSMUSG00000025369.15	Smarcc2	cKO_vs_wt	0.0294088	0.82992	-0.0402963	0.999978	-0.0731516	0.99997	334.93	183.424	341.284	180.603
ENSMUSG00000024576.14	Csnk1a1	cKO_vs_wt	0.0602914	0.523728	0.0371355	0.999978	-0.0280442	0.99997	334.755	370.66	348.488	384.751
ENSMUSG00000053398.11	Phgdh	cKO_vs_wt	-0.0277792	0.882364	0.111094	0.999978	0.134178	0.99997	329.565	41.3673	322.747	45.31
ENSMUSG00000027533.10	Fabp5	cKO_vs_wt	-0.0218089	0.923266	-0.19039	0.999978	-0.172432	0.99997	329.241	279.62	323.578	247.699
ENSMUSG00000021577.14	Sdha	cKO_vs_wt	-0.0618655	0.457362	-0.07209	0.999978	-0.0142647	0.99997	332.547	548.734	318.178	527.229
ENSMUSG00000051855.15	Mest	cKO_vs_wt	-0.104572	0.813195	0.105265	0.999978	0.208487	0.99997	332.826	336.903	308.911	366.288
ENSMUSG00000031029.6	Eif3f	cKO_vs_wt	0.0325423	0.801857	0.0422098	0.999978	0.00614322	0.99997	331.753	627.679	338.681	653.966
ENSMUSG00000018770.9	Atp5g3	cKO_vs_wt	0.0906558	0.300723	-0.0395328	0.999978	-0.133295	0.980438	331.837	561.517	352.707	551.688
ENSMUSG00000041415.10	Dicer1	cKO_vs_wt	-0.0357638	0.823795	-0.0436124	0.999978	-0.0128942	0.99997	331.463	184.585	322.947	181.086
ENSMUSG00000020923.17	Ubtf	cKO_vs_wt	0.0426409	0.565183	-0.0428503	0.999978	-0.0891963	0.99997	331.029	344.071	340.421	337.922
ENSMUSG00000020402.11	Vdac1	cKO_vs_wt	-0.0378721	0.632519	-0.0554863	0.999978	-0.0210979	0.99997	330.461	539.365	321.464	524.424
ENSMUSG00000009470.17	Tnpo1	cKO_vs_wt	-0.0366943	0.801857	0.0951667	0.999978	0.126864	0.99997	329.517	270.952	320.684	292.945
ENSMUSG00000028851.6	Nudc	cKO_vs_wt	0.119006	0.100472	-0.148043	0.999978	-0.270685	0.224516	323.288	225.473	350.554	206.295
ENSMUSG00000003226.7	Ranbp2	cKO_vs_wt	0.00783639	0.972719	-0.0476553	0.999978	-0.0597417	0.99997	329.914	224.505	331.019	219.365
ENSMUSG00000015120.15	Ube2i	cKO_vs_wt	0.0411699	0.675626	-0.168881	0.999978	-0.219797	0.99997	292.459	2.47783	300.373	2.23804
ENSMUSG00000071646.9	Mta2	cKO_vs_wt	-0.0237035	0.838851	-0.0675513	0.999978	-0.0476446	0.99997	328.208	282.211	322.36	272.484
ENSMUSG00000027405.16	Nop56	cKO_vs_wt	0.0475495	0.697047	0.0186847	0.999978	-0.0319609	0.99997	322.629	189.913	332.901	194.248
ENSMUSG00000009013.5	Dynll1	cKO_vs_wt	-0.06217	0.664194	0.0454671	0.999978	0.104079	0.99997	324.542	266.136	310.365	278.389
ENSMUSG00000013787.15	Ehmt2	cKO_vs_wt	0.112657	0.10327	-0.0180819	0.999978	-0.135543	0.876919	327.219	262.699	353.192	263.019
ENSMUSG00000030603.16	Psmc4	cKO_vs_wt	-0.0535123	0.57182	-0.0293825	0.999978	0.020644	0.99997	326.919	666.182	314.479	660.317
ENSMUSG00000014956.15	Ppp1cb	cKO_vs_wt	0.00457215	0.980772	-0.00707119	0.999978	-0.0152875	0.99997	325.176	527.858	325.776	530.959
ENSMUSG00000002524.17	Puf60	cKO_vs_wt	0.0164583	0.921808	-0.0613721	0.999978	-0.0822028	0.99997	325.406	489.996	328.569	475.542
ENSMUSG00000019471.10	Cdc37	cKO_vs_wt	-0.0298569	0.800101	-0.0810082	0.999978	-0.0559243	0.99997	325.507	513.233	318.268	491.665
ENSMUSG00000031960.14	Aars	cKO_vs_wt	0.0107435	0.935821	-0.0658179	0.999978	-0.0802886	0.99997	323.672	447.153	325.539	432.425
ENSMUSG00000062203.15	Gspt1	cKO_vs_wt	0.0618063	0.416721	0.0656726	0.999978	0.000549692	0.99997	323.856	548.13	337.408	580.684
ENSMUSG00000031229.16	Atrx	cKO_vs_wt	0.00522203	0.98391	-0.146735	0.999978	-0.156524	0.99997	323.439	253.348	324.03	231.399
ENSMUSG00000025781.14	Atp5c1	cKO_vs_wt	-0.0195886	0.885943	0.0323584	0.999978	0.0472535	0.99997	323.012	399.44	318.142	412.703
ENSMUSG00000001175.15	Calm1	cKO_vs_wt	0.190955	4.51915e-05	0.0379792	0.999978	-0.157362	0.911831	320.115	1637.35	364.68	1702.18
ENSMUSG00000053754.14	Chd8	cKO_vs_wt	-0.0214314	0.899037	-0.119804	0.999978	-0.101948	0.99997	321.561	219.461	316.354	204.115
ENSMUSG00000020708.12	Psmc5	cKO_vs_wt	-0.0272417	0.876771	-0.037668	0.999978	-0.0150087	0.99997	321.304	587.153	314.67	578.553
ENSMUSG00000052833.9	Sae1	cKO_vs_wt	0.0812978	0.326289	-0.0269573	0.999978	-0.11207	0.996611	321.021	595.603	338.972	591.011
ENSMUSG00000117098.1	Gm49909	cKO_vs_wt	-0.0708586	0.563513	-0.0550017	0.999978	0.0101807	0.99997	297.242	278.628	282.354	271.869
ENSMUSG00000029106.14	Add1	cKO_vs_wt	0.016235	0.884199	-0.0234146	0.999978	-0.0436829	0.99997	319.474	427.593	322.684	425.94
ENSMUSG00000020180.10	Snrpd3	cKO_vs_wt	0.0195609	0.911474	-0.0624316	0.999978	-0.0857683	0.99997	320.179	365.426	323.958	354.176
ENSMUSG00000045427.13	Hnrnph2	cKO_vs_wt	-0.00770903	0.964109	-0.043313	0.999978	-0.0398218	0.99997	312.191	106.664	309.871	104.521
ENSMUSG00000042133.16	Ppig	cKO_vs_wt	0.0781994	0.429164	-0.0658908	0.999978	-0.147908	0.99997	318.15	137.22	335.179	132.733
ENSMUSG00000005846.12	Rsl1d1	cKO_vs_wt	0.0311663	0.840985	-0.0462625	0.999978	-0.0818043	0.99997	317.674	310.683	324.004	303.887
ENSMUSG00000066036.14	Ubr4	cKO_vs_wt	-0.120926	0.412668	-0.0405413	0.999978	0.0763967	0.99997	316.051	277.146	290.086	273.604
ENSMUSG00000062006.12	Rpl34	cKO_vs_wt	-0.099615	0.55132	-0.0184189	0.999978	0.0739617	0.99997	310.489	63.9412	289.153	63.5567
ENSMUSG00000027404.15	Snrpb	cKO_vs_wt	0.0199778	0.922594	-0.0235454	0.999978	-0.0470638	0.99997	316.127	471.942	319.955	469.921
ENSMUSG00000046865.7	Fbl	cKO_vs_wt	-0.00723175	0.967462	-0.363292	0.999978	-0.357323	0.259278	304.906	82.5242	302.643	64.5963
ENSMUSG00000025580.15	Eif4a3	cKO_vs_wt	0.002578	0.987466	-0.0161889	0.999978	-0.0219446	0.99997	315.062	385.412	315.099	385.97
ENSMUSG00000038502.17	Ptov1	cKO_vs_wt	0.0557142	0.577725	0.1439	0.999978	0.0855594	0.99997	314.971	650.875	326.862	730.418
ENSMUSG00000061613.13	U2af1	cKO_vs_wt	-0.0155784	0.925585	0.0555785	0.999978	0.0551023	0.99997	310.807	10.5462	306.895	11.2515
ENSMUSG00000022205.15	Sub1	cKO_vs_wt	-0.0488133	0.692127	-0.00486793	0.999978	0.0404209	0.99997	315.16	723.132	304.175	728.988
ENSMUSG00000007670.10	Khsrp	cKO_vs_wt	0.207174	0.000190586	-0.0804916	0.999978	-0.292095	0.0611002	314.766	405.718	362.688	389.146
ENSMUSG00000005698.15	Ctcf	cKO_vs_wt	-0.0143674	0.911944	-0.0542257	0.999978	-0.0436185	0.99997	313.865	239.527	310.266	233.372
ENSMUSG00000042688.16	Mapk6	cKO_vs_wt	-0.0125973	0.936858	0.115854	0.999978	0.123128	0.99997	302.142	93.5865	299.217	102.442
ENSMUSG00000038943.16	Prc1	cKO_vs_wt	-0.0618474	0.482244	-0.0924564	0.999978	-0.0344959	0.99997	313.653	331.641	299.966	314.29
ENSMUSG00000056342.16	Usp34	cKO_vs_wt	0.0138292	0.952059	0.0538964	0.999978	0.0355695	0.99997	313.413	106.944	315.992	112.356
ENSMUSG00000022141.7	Nipbl	cKO_vs_wt	-0.036079	0.840735	0.0115967	0.999978	0.043491	0.99997	312.645	128.366	304.407	130.666
ENSMUSG00000027566.15	Psma7	cKO_vs_wt	-0.0277079	0.885943	-0.0163	0.999978	0.00787709	0.99997	312.42	644.44	305.84	644.476
ENSMUSG00000032228.16	Tcf12	cKO_vs_wt	-0.0106175	0.941327	-0.0228578	0.999978	-0.0159132	0.99997	312.075	178.077	309.483	176.977
ENSMUSG00000015176.11	Nolc1	cKO_vs_wt	-0.0611213	0.589512	-0.12481	0.999978	-0.0676684	0.99997	311.31	200.501	297.85	186.04
ENSMUSG00000026341.16	Actr3	cKO_vs_wt	0.105004	0.0781903	-0.0462787	0.999978	-0.15366	0.866805	311.565	117.036	334.617	114.699
ENSMUSG00000060739.8	Nsa2	cKO_vs_wt	-0.00257468	0.988125	-0.165443	0.999978	-0.164775	0.99997	292.348	15.3333	291.185	13.7737
ENSMUSG00000002052.6	Supt6	cKO_vs_wt	-0.0665189	0.351153	-0.125791	0.999978	-0.0636229	0.99997	310.173	259.308	295.803	240.076
ENSMUSG00000020994.5	Pnn	cKO_vs_wt	-0.0761878	0.575029	-0.100565	0.999978	-0.0270909	0.99997	310.147	298.369	293.635	281.207
ENSMUSG00000024660.9	Incenp	cKO_vs_wt	-0.0203797	0.911474	-0.0120235	0.999978	0.0042425	0.99997	309.982	277.23	304.947	278.406
ENSMUSG00000028800.15	Hdac1	cKO_vs_wt	-0.00120985	0.993664	0.090211	0.999978	0.0877033	0.99997	305.499	23.7249	304.67	25.8145
ENSMUSG00000024474.7	Ik	cKO_vs_wt	0.0037951	0.983699	-0.211176	0.999978	-0.21909	0.935695	309.36	492.173	309.58	429.699
ENSMUSG00000073676.4	Hspe1	cKO_vs_wt	-0.0734729	0.605413	-0.221722	0.999978	-0.151954	0.99997	308.669	78.8528	292.809	68.1386
ENSMUSG00000021144.14	Mta1	cKO_vs_wt	0.202466	0.000817626	-0.0954242	0.999978	-0.303321	0.0658828	308.952	165.434	354.911	156.926
ENSMUSG00000031701.6	Dnaja2	cKO_vs_wt	0.0480677	0.62769	-0.0684616	0.999978	-0.121084	0.99997	308.359	569.973	318.156	548.839
ENSMUSG00000028760.16	Eif4g3	cKO_vs_wt	-0.0267077	0.820117	-0.0490691	0.999978	-0.0260586	0.99997	307.684	128.58	301.69	125.743
ENSMUSG00000063015.12	Ccni	cKO_vs_wt	0.0432982	0.719245	0.086917	0.999978	0.0385209	0.99997	302.061	11.9613	310.825	12.8615
ENSMUSG00000024054.14	Smchd1	cKO_vs_wt	-0.00148064	0.993664	-0.0999621	0.999978	-0.10223	0.99997	307.311	301.298	306.405	283.978
ENSMUSG00000006740.14	Kif5b	cKO_vs_wt	0.0237315	0.886261	-0.072321	0.999978	-0.101472	0.99997	307.049	405.715	311.493	389.743
ENSMUSG00000024587.10	Nars	cKO_vs_wt	0.0105689	0.9361	-0.026199	0.999978	-0.04054	0.99997	306.512	463.459	308.218	460.513
ENSMUSG00000033581.17	Igf2bp2	cKO_vs_wt	-0.00254162	0.987466	0.00133186	0.999978	5.1041e-05	0.99997	306.604	308.39	305.547	312.676
ENSMUSG00000024360.8	Etf1	cKO_vs_wt	0.0916888	0.320165	0.0650591	0.999978	-0.0304439	0.99997	306.433	376.514	325.993	397.489
ENSMUSG00000031134.16	Rbmx	cKO_vs_wt	-0.0288548	0.876771	-0.138691	0.999978	-0.113828	0.99997	305.115	303.269	298.58	278.52
ENSMUSG00000063273.11	Naa15	cKO_vs_wt	0.0226279	0.892154	-0.000952547	0.999978	-0.0275186	0.99997	304.58	397.964	308.836	402.017
ENSMUSG00000028431.11	Elp1	cKO_vs_wt	-0.0226039	0.883484	-0.0651111	0.999978	-0.0457182	0.99997	304.264	445.068	299.013	430.324
ENSMUSG00000055204.15	Ankrd17	cKO_vs_wt	-0.0264107	0.852174	-0.0351154	0.999978	-0.0124305	0.99997	303.31	270.894	297.311	267.4
ENSMUSG00000021024.14	Psma6	cKO_vs_wt	-0.0205126	0.901844	-0.0217726	0.999978	-0.00630184	0.99997	303.479	562.507	298.622	559.35
ENSMUSG00000037313.16	Tacc3	cKO_vs_wt	-0.022769	0.8691	-0.0200186	0.999978	-0.00131406	0.99997	298.296	358.488	293.038	357.964
ENSMUSG00000028759.13	Hp1bp3	cKO_vs_wt	-0.0135764	0.908171	0.0101989	0.999978	0.0194886	0.99997	302.387	208.852	299.176	212.983
ENSMUSG00000038762.15	Abcf1	cKO_vs_wt	-0.0424993	0.738849	-0.0697497	0.999978	-0.0312108	0.99997	302.417	233.535	293.172	224.959
ENSMUSG00000019923.14	Zwint	cKO_vs_wt	-0.0869922	0.305014	0.0420788	0.999978	0.125371	0.921848	301.991	483	283.797	503.717
ENSMUSG00000044627.11	Swi5	cKO_vs_wt	0.0203875	0.907502	0.116765	0.999978	0.0926761	0.99997	301.83	419.257	305.617	458.29
ENSMUSG00000028906.16	Epb41	cKO_vs_wt	-0.0055816	0.971189	0.00790393	0.999978	0.00937213	0.99997	301.139	336.932	299.694	343.78
ENSMUSG00000027597.15	Ahcy	cKO_vs_wt	-0.0174588	0.919442	0.272573	0.999978	0.304361	0.99997	259.607	1.65956	256.17	2.00647
ENSMUSG00000057322.12	Rpl38	cKO_vs_wt	-0.0603717	0.813784	-0.217584	0.999978	-0.173035	0.99997	299.432	0.376281	286.498	0.330144
ENSMUSG00000000751.13	Rpa1	cKO_vs_wt	-0.0199576	0.883344	-0.0536934	0.999978	-0.037596	0.99997	300.444	495.932	295.775	482.808
ENSMUSG00000001729.14	Akt1	cKO_vs_wt	0.000456585	0.997744	-0.0552282	0.999978	-0.0596607	0.99997	300.136	160.228	299.952	156.192
ENSMUSG00000038759.15	Nup205	cKO_vs_wt	-0.0657996	0.399025	0.000822134	0.999978	0.062999	0.99997	300.002	335.375	286.124	339.721
ENSMUSG00000023832.14	Acat2	cKO_vs_wt	-0.129272	0.119078	-0.229102	0.999978	-0.104115	0.99997	212.58	132.117	194.031	114.077
ENSMUSG00000022962.15	Gart	cKO_vs_wt	-0.0340272	0.795443	0.0264957	0.999978	0.0572977	0.99997	298.69	392.731	291.222	404.768
ENSMUSG00000034269.12	Setd5	cKO_vs_wt	-0.0981655	0.118833	-0.0370129	0.999978	0.0551813	0.99997	298.406	90.309	278.441	89.0858
ENSMUSG00000061032.9	Rrp1	cKO_vs_wt	0.0415064	0.721149	-0.0389952	0.999978	-0.084238	0.99997	297.679	359.794	305.729	354.846
ENSMUSG00000042207.17	Kdm5b	cKO_vs_wt	-0.0638336	0.532676	-0.0836403	0.999978	-0.0231236	0.99997	297.75	331.783	284.421	316.375
ENSMUSG00000031799.10	Tpm4	cKO_vs_wt	0.152875	0.0246259	-0.0716135	0.999978	-0.228262	0.296222	297.468	278.254	330.187	268.557
ENSMUSG00000019179.10	Mdh2	cKO_vs_wt	0.116236	0.1274	-0.0492989	0.999978	-0.170056	0.731581	295.905	669.258	320.197	653.445
ENSMUSG00000035152.14	Ap2b1	cKO_vs_wt	-0.0477009	0.595597	-0.00299721	0.999978	0.0413432	0.99997	296.493	329.443	286.478	332.819
ENSMUSG00000021500.17	Ddx46	cKO_vs_wt	0.0149092	0.925055	-0.0804548	0.999978	-0.0988705	0.99997	295.119	364.801	297.709	349.347
ENSMUSG00000032407.14	U2surp	cKO_vs_wt	0.00497334	0.980921	-0.064452	0.999978	-0.0745543	0.99997	295.009	200.577	295.468	193.967
ENSMUSG00000035247.16	Hectd1	cKO_vs_wt	0.0171687	0.916752	-0.107632	0.999978	-0.127859	0.99997	292.852	253.345	295.982	237.691
ENSMUSG00000022956.11	Atp5o	cKO_vs_wt	-0.0388358	0.813195	0.00980845	0.999978	0.0458649	0.99997	294.33	419.171	286.017	427.51
ENSMUSG00000034610.14	Tut4	cKO_vs_wt	0.0031046	0.984764	-0.0780384	0.999978	-0.0841174	0.99997	293.105	148.004	293.324	141.543
ENSMUSG00000033307.7	Mif	cKO_vs_wt	0.238761	0.0316009	0.945168	0.999978	0.698302	0.62991	290.17	5.90016	341.368	11.6446
ENSMUSG00000027201.16	Myef2	cKO_vs_wt	0.0047413	0.974682	-0.00311074	0.999978	-0.0115796	0.99997	278.306	115.365	278.771	116.314
ENSMUSG00000058230.12	Arhgap35	cKO_vs_wt	-0.0578744	0.650722	0.0147659	0.999978	0.0683101	0.99997	291.549	140.493	279.751	143.172
ENSMUSG00000029004.15	Kmt2e	cKO_vs_wt	0.0205472	0.903531	0.123967	0.999978	0.0976803	0.99997	291.687	47.8795	295.365	52.8236
ENSMUSG00000023110.12	Prmt5	cKO_vs_wt	-0.0818054	0.255199	-0.0779514	0.999978	-0.00038937	0.99997	291.654	324.071	275.151	310.496
ENSMUSG00000020167.14	Tcf3	cKO_vs_wt	0.294747	1.6554e-06	-0.0349129	0.999978	-0.33532	0.0988789	290.748	201.615	355.959	199.802
ENSMUSG00000024498.16	Tcerg1	cKO_vs_wt	-0.00455432	0.983153	-0.0625961	0.999978	-0.0618638	0.99997	290.625	233.598	289.133	226.466
ENSMUSG00000021244.15	Ylpm1	cKO_vs_wt	0.00117089	0.995318	0.0600003	0.999978	0.0576931	0.99997	291.684	151.512	291.341	159.594
ENSMUSG00000020362.13	Cnot6	cKO_vs_wt	-0.000936228	0.995701	-0.0394746	0.999978	-0.0435038	0.99997	291.233	109.491	290.589	108.127
ENSMUSG00000011257.19	Pabpc4	cKO_vs_wt	0.0941012	0.215087	-0.250636	0.999978	-0.358036	0.615213	281.922	5.67642	300.494	4.84619
ENSMUSG00000025862.14	Stag2	cKO_vs_wt	0.0528585	0.698989	0.0102293	0.999978	-0.0466344	0.99997	290.845	265.439	301.094	270.247
ENSMUSG00000022443.17	Myh9	cKO_vs_wt	-0.185604	0.150417	-0.157406	0.999978	0.0243595	0.99997	290.638	602.295	255.161	547.296
ENSMUSG00000028138.8	Adh5	cKO_vs_wt	0.00462929	0.976455	-0.179498	0.999978	-0.187879	0.36241	290.916	461.287	291.37	411.679
ENSMUSG00000028649.19	Macf1	cKO_vs_wt	-0.0448265	0.883344	-0.0922842	0.999978	-0.0501956	0.99997	290.31	134.511	280.941	127.672
ENSMUSG00000030216.12	Wbp11	cKO_vs_wt	0.00989076	0.955171	-0.123588	0.999978	-0.139072	0.980438	287.835	172.525	289.313	160.411
ENSMUSG00000004364.14	Cul3	cKO_vs_wt	0.0825776	0.454253	-0.0404036	0.999978	-0.126632	0.99997	289.284	261.46	305.907	256.401
ENSMUSG00000032582.14	Rbm6	cKO_vs_wt	0.0448855	0.594337	0.0507609	0.999978	0.00562506	0.99997	289.143	82.3587	297.755	86.0621
ENSMUSG00000058355.8	Abce1	cKO_vs_wt	0.0376466	0.807542	0.0575029	0.999978	0.0161898	0.99997	288.976	297.735	296.171	312.548
ENSMUSG00000003360.15	Ddx23	cKO_vs_wt	-0.0771731	0.43776	-0.0919453	0.999978	-0.0187236	0.99997	288.871	257.543	273.323	244.392
ENSMUSG00000057863.6	Rpl36	cKO_vs_wt	-0.136129	0.313609	-0.583817	0.999978	-0.428021	0.99997	285.776	0.201652	259.312	0.130493
ENSMUSG00000027479.14	Mapre1	cKO_vs_wt	0.0159686	0.905168	0.0173049	0.999978	-0.00361275	0.99997	288.685	300.05	291.393	306.396
ENSMUSG00000056999.15	Ide	cKO_vs_wt	-0.180663	0.186288	-0.179491	0.999978	-0.00258345	0.99997	288.578	381.616	253.991	340.265
ENSMUSG00000038429.10	Usp5	cKO_vs_wt	-0.0479607	0.614113	-0.0402304	0.999978	0.00371691	0.99997	288.509	356.283	278.713	351.123
ENSMUSG00000018286.6	Psmb6	cKO_vs_wt	-0.109148	0.255199	-0.0990186	0.999978	0.00659045	0.99997	288.259	553.205	266.759	523.19
ENSMUSG00000064302.13	Clasp1	cKO_vs_wt	-0.0655844	0.563513	-0.0826501	0.999978	-0.0212374	0.99997	287.694	282.35	274.438	269.722
ENSMUSG00000031540.13	Kat6a	cKO_vs_wt	-0.0655333	0.668312	0.0450507	0.999978	0.104952	0.99997	287.499	109.586	274.422	114.371
ENSMUSG00000030516.14	Tjp1	cKO_vs_wt	-0.018724	0.911944	-0.0518141	0.999978	-0.0369088	0.99997	287.612	247.08	283.424	241.051
ENSMUSG00000027699.19	Ect2	cKO_vs_wt	-0.0790571	0.422623	-0.0634198	0.999978	0.0109095	0.99997	287.631	252.143	271.883	243.625
ENSMUSG00000025950.16	Idh1	cKO_vs_wt	-0.0283805	0.859226	-0.106196	0.999978	-0.0823288	0.99997	286.086	372.481	280.243	348.993
ENSMUSG00000041530.16	Ago1	cKO_vs_wt	-0.0336784	0.854504	-0.125469	0.999978	-0.0967043	0.99997	284.714	137.811	277.68	128.193
ENSMUSG00000028556.15	Dock7	cKO_vs_wt	-0.0626453	0.584491	-0.0550545	0.999978	0.00354656	0.99997	285.922	247.754	273.486	241.013
ENSMUSG00000053907.10	Mat2a	cKO_vs_wt	0.082266	0.392209	-0.00097111	0.999978	-0.0866683	0.99997	285.66	286.417	302.011	288.852
ENSMUSG00000027823.9	Gmps	cKO_vs_wt	0.0642108	0.47258	0.00255767	0.999978	-0.0655749	0.99997	284.267	376.229	296.682	380.552
ENSMUSG00000028902.4	Sf3a3	cKO_vs_wt	-0.0646038	0.484183	-0.0736777	0.999978	-0.0127275	0.99997	285.39	432.808	272.346	415.706
ENSMUSG00000061136.14	Prpf40a	cKO_vs_wt	0.0103452	0.9564	0.0114636	0.999978	-0.00247071	0.99997	284.595	298.579	285.986	304.219
ENSMUSG00000024613.16	Tcof1	cKO_vs_wt	0.0317317	0.78832	-0.0926724	0.999978	-0.128894	0.970916	283.211	159.28	289.082	151.297
ENSMUSG00000029713.15	Gnb2	cKO_vs_wt	0.0456731	0.663198	-0.00769574	0.999978	-0.0570812	0.99997	283.796	612.337	292.654	618.343
ENSMUSG00000003779.16	Kif20a	cKO_vs_wt	-0.0480855	0.595597	-0.0793462	0.999978	-0.035357	0.99997	283.77	415.169	273.954	397.861
ENSMUSG00000068739.13	Sars	cKO_vs_wt	-0.0904687	0.303679	-0.0895612	0.999978	-0.00279388	0.99997	283.6	393.119	265.955	374.112
ENSMUSG00000029062.14	Cdk11b	cKO_vs_wt	-0.0655218	0.623449	-0.0947576	0.999978	-0.0340427	0.99997	283.226	221.773	270.172	210.051
ENSMUSG00000036768.6	Kif15	cKO_vs_wt	-0.0138568	0.93516	-0.0272604	0.999978	-0.0177916	0.99997	282.813	323.48	279.601	320.913
ENSMUSG00000028656.14	Cap1	cKO_vs_wt	-0.0647344	0.416721	-0.042442	0.999978	0.0186088	0.99997	282.628	486.731	269.854	477.3
ENSMUSG00000092232.1	Gm20521	cKO_vs_wt	0.00920847	0.955527	-0.0195418	0.999978	-0.0327285	0.99997	275.36	182.036	276.631	182.2
ENSMUSG00000032301.13	Psma4	cKO_vs_wt	0.0404708	0.777655	-0.0308244	0.999978	-0.0768032	0.99997	281.847	158.506	289.368	156.889
ENSMUSG00000028367.5	Txn1	cKO_vs_wt	-0.0239063	0.914096	-0.0264682	0.999978	-0.00754704	0.99997	281.753	730.384	276.671	725.228
ENSMUSG00000040204.6	Pclaf	cKO_vs_wt	-0.0607321	0.538905	0.0446738	0.999978	0.101122	0.99997	280.725	74.3275	268.733	77.4022
ENSMUSG00000062078.15	Qk	cKO_vs_wt	-0.0791067	0.463997	-0.0579927	0.999978	0.0168758	0.99997	281.41	482.075	266.036	468.482
ENSMUSG00000048076.14	Arf1	cKO_vs_wt	-0.105275	0.123605	-0.222214	0.999978	-0.120866	0.99997	279.638	116.461	259.54	101.464
ENSMUSG00000031818.12	Cox4i1	cKO_vs_wt	-0.0928746	0.402959	0.0482329	0.999978	0.13799	0.958845	281.43	687.152	263.426	718.248
ENSMUSG00000021945.9	Zmym2	cKO_vs_wt	0.041013	0.763388	0.0171044	0.999978	-0.0282885	0.99997	280.552	211.595	288.25	216.441
ENSMUSG00000022536.14	Glyr1	cKO_vs_wt	-0.0421232	0.696911	-0.0851303	0.999978	-0.0473214	0.99997	281.076	370.904	272.51	353.673
ENSMUSG00000035569.17	Ankrd11	cKO_vs_wt	-0.139178	0.108537	-0.242904	0.999978	-0.108033	0.99997	280.608	76.6096	254.373	65.5326
ENSMUSG00000024165.9	Jpt2	cKO_vs_wt	-0.114667	0.09851	0.0474215	0.999978	0.15749	0.961421	280.479	217.538	258.509	228.305
ENSMUSG00000041638.18	Gcn1l1	cKO_vs_wt	-0.0570894	0.611789	0.0471892	0.999978	0.100389	0.99997	276.972	243.896	265.824	255.709
ENSMUSG00000052533.14	Nup188	cKO_vs_wt	-0.124733	0.0246259	-0.0416784	0.999978	0.0785008	0.99997	279.46	262.418	256.013	258.536
ENSMUSG00000012535.14	Tnpo3	cKO_vs_wt	-0.0066745	0.960864	0.0656508	0.999978	0.0682108	0.99997	279.611	233.047	277.952	246.996
ENSMUSG00000004885.5	Crabp2	cKO_vs_wt	-0.0370032	0.853238	-0.207862	0.999978	-0.174713	0.99997	279.622	790.613	272.196	690.738
ENSMUSG00000022194.15	Pabpn1	cKO_vs_wt	0.0104827	0.950192	-0.00355783	0.999978	-0.0171188	0.99997	272.655	304.38	274.157	308.191
ENSMUSG00000032777.9	Gtf3c1	cKO_vs_wt	-0.0565683	0.558631	-0.0926373	0.999978	-0.0397514	0.99997	279.027	311.217	268.019	295.779
ENSMUSG00000055531.12	Cpsf6	cKO_vs_wt	0.0222541	0.883484	-0.0994525	0.999978	-0.125908	0.922788	278.81	470.447	282.561	444.582
ENSMUSG00000022629.17	Kif21a	cKO_vs_wt	-0.00317798	0.987164	-0.0206468	0.999978	-0.0220943	0.99997	277.808	167.556	276.846	167.264
ENSMUSG00000031068.8	Glrx3	cKO_vs_wt	0.00876871	0.960088	0.0634992	0.999978	0.049108	0.99997	276.564	57.8221	277.697	61.3753
ENSMUSG00000038664.16	Herc1	cKO_vs_wt	0.0344765	0.885193	-0.0194005	0.999978	-0.0589378	0.99997	277.305	158.838	283.498	158.527
ENSMUSG00000028330.8	Ncbp1	cKO_vs_wt	0.0692787	0.467945	-0.028622	0.999978	-0.102028	0.99997	277.485	364.609	290.762	361.484
ENSMUSG00000025332.14	Kdm5c	cKO_vs_wt	0.00154469	0.99746	0.0159586	0.999978	0.010228	0.99997	277.286	229.275	277.429	234.027
ENSMUSG00000024073.16	Birc6	cKO_vs_wt	-0.0365979	0.874812	-0.0673125	0.999978	-0.0350017	0.99997	276.234	299.612	268.843	289.706
ENSMUSG00000034675.17	Dbn1	cKO_vs_wt	0.220592	0.000942305	0.0184079	0.999978	-0.206392	0.669988	275.596	318.175	320.374	326.924
ENSMUSG00000061887.14	Ssbp3	cKO_vs_wt	-0.00900855	0.955527	0.0533334	0.999978	0.0578614	0.99997	274.943	179.278	272.72	188.518
ENSMUSG00000024271.8	Elp2	cKO_vs_wt	-0.00284247	0.983606	-0.0980829	0.999978	-0.0990704	0.99997	275.457	401.849	274.459	379.646
ENSMUSG00000010277.7	2610507B11Rik	cKO_vs_wt	0.0188497	0.930866	-0.0479339	0.999978	-0.073498	0.99997	273.79	29.8204	277.056	29.2802
ENSMUSG00000016018.4	Mtrex	cKO_vs_wt	0.0172063	0.923328	-0.0338851	0.999978	-0.054665	0.99997	273.551	303.283	276.285	299.546
ENSMUSG00000055436.18	Srsf11	cKO_vs_wt	-0.0289162	0.854095	0.0189729	0.999978	0.044717	0.99997	271.809	440.698	265.897	452.744
ENSMUSG00000021109.13	Hif1a	cKO_vs_wt	-0.0123745	0.93379	-0.0579394	0.999978	-0.0504892	0.99997	272.609	364.937	269.849	354.295
ENSMUSG00000020612.16	Prkar1a	cKO_vs_wt	-0.00108575	0.995318	-0.117299	0.999978	-0.119958	0.935695	272.777	597.678	272.184	557.462
ENSMUSG00000034252.14	Senp6	cKO_vs_wt	0.0690239	0.467098	-0.0402455	0.999978	-0.113116	0.99997	271.472	126.181	284.417	123.752
ENSMUSG00000025001.11	Hells	cKO_vs_wt	0.144227	0.0960047	-0.0056957	0.999978	-0.154079	0.99997	271.498	354.998	299.484	356.917
ENSMUSG00000067150.6	Xpo5	cKO_vs_wt	-0.0323778	0.796016	0.0366896	0.999978	0.065278	0.99997	271.805	419.885	265.417	436.52
ENSMUSG00000024151.13	Msh2	cKO_vs_wt	0.0767926	0.307088	0.00215764	0.999978	-0.0783013	0.99997	270.795	338.786	285.114	343.471
ENSMUSG00000034566.10	Atp5h	cKO_vs_wt	-0.0686749	0.689479	-0.00109057	0.999978	0.0621919	0.99997	259.583	95.1423	246.955	96.0688
ENSMUSG00000020069.16	Hnrnph3	cKO_vs_wt	0.0700397	0.517683	-0.218224	0.999978	-0.291364	0.338966	270.794	524.224	283.79	455.017
ENSMUSG00000023495.13	Pcbp4	cKO_vs_wt	0.406608	4.22315e-14	-0.0461643	0.999978	-0.45772	8.09125e-06	269.638	306.814	356.801	301.05
ENSMUSG00000018548.15	Trim37	cKO_vs_wt	0.0699298	0.547704	-0.0113527	0.999978	-0.0857583	0.99997	269.764	135.829	282.822	135.86
ENSMUSG00000008690.15	Ncaph2	cKO_vs_wt	-0.0658828	0.429129	-0.0235386	0.999978	0.0373079	0.99997	269.268	97.3967	256.842	97.1873
ENSMUSG00000029121.16	Crmp1	cKO_vs_wt	-0.0277841	0.885193	-0.0966745	0.999978	-0.0731481	0.99997	269.326	292.053	264.057	276.347
ENSMUSG00000028960.19	Ube4b	cKO_vs_wt	-0.0148605	0.919931	0.00279595	0.999978	0.0137182	0.99997	268.114	306.821	265.005	311.343
ENSMUSG00000040383.16	Aqr	cKO_vs_wt	0.0257169	0.851503	-0.0641564	0.999978	-0.0933423	0.99997	268.261	227.291	272.704	220.054
ENSMUSG00000039477.16	Tnrc18	cKO_vs_wt	0.23797	0.000542524	-0.060815	0.999978	-0.304534	0.01954	267.996	96.6002	315.436	93.7967
ENSMUSG00000032050.17	Rdx	cKO_vs_wt	-0.0412622	0.750813	-0.117907	0.999978	-0.0811979	0.99997	268.023	356.544	259.993	332.09
ENSMUSG00000035960.14	Apex1	cKO_vs_wt	0.0153055	0.919442	0.0212955	0.999978	0.00161411	0.99997	267.829	434.229	270.277	446.308
ENSMUSG00000020547.5	Bzw2	cKO_vs_wt	0.0275028	0.822505	0.0767076	0.999978	0.0447005	0.99997	267.29	313.778	271.954	335.014
ENSMUSG00000030246.11	Ldhb	cKO_vs_wt	-0.0307248	0.772915	0.123901	0.999978	0.151064	0.442932	267.235	214.34	261.123	236.188
ENSMUSG00000032097.10	Ddx6	cKO_vs_wt	-0.0374738	0.807542	-0.0659485	0.999978	-0.0321622	0.99997	266.771	184.464	259.73	178.044
ENSMUSG00000021807.6	Rtraf	cKO_vs_wt	0.123092	0.257503	-0.0321268	0.999978	-0.158389	0.99997	266.945	208.369	290.142	205.541
ENSMUSG00000029629.17	Phf14	cKO_vs_wt	0.0836742	0.239719	-0.0374563	0.999978	-0.125223	0.935695	256.837	150.938	271.694	148.575
ENSMUSG00000117748.1	Chtf8	cKO_vs_wt	-0.0464941	0.646419	0.0237241	0.999978	0.0636032	0.99997	266.64	83.3905	257.977	86.1492
ENSMUSG00000028932.7	Psmc2	cKO_vs_wt	-0.0502676	0.677738	-0.0677199	0.999978	-0.0213548	0.99997	265.364	382.56	255.736	369.294
ENSMUSG00000059248.13	2022-09-09	cKO_vs_wt	0.0171301	0.912565	0.0200045	0.999978	-0.00115721	0.99997	265.125	377.772	267.805	388.642
ENSMUSG00000071072.12	Ptges3	cKO_vs_wt	0.189132	0.0335915	0.176065	0.999978	-0.021709	0.99997	259.666	0.536938	295.346	0.618103
ENSMUSG00000015222.17	Map2	cKO_vs_wt	0.00996753	0.966538	0.0953556	0.999978	0.0815557	0.99997	264.928	334.955	266.527	363.205
ENSMUSG00000029817.11	Tra2a	cKO_vs_wt	-0.0415721	0.711491	-0.0975591	0.999978	-0.0596083	0.99997	264.362	531.02	256.326	501.509
ENSMUSG00000001783.3	Rtcb	cKO_vs_wt	-0.0598659	0.483136	-0.0530328	0.999978	0.00283248	0.99997	264.636	395.005	253.493	384.348
ENSMUSG00000029405.16	G3bp2	cKO_vs_wt	0.0143221	0.911944	-0.0504037	0.999978	-0.0690157	0.99997	263.474	477.639	265.744	465.846
ENSMUSG00000036893.17	Ehmt1	cKO_vs_wt	-0.0232427	0.883484	-0.0121946	0.999978	0.00680448	0.99997	263.068	240.485	258.623	241.459
ENSMUSG00000063694.5	Cycs	cKO_vs_wt	-0.0543853	0.707578	0.422872	0.999978	0.473799	0.99997	240.322	0	231.015	0.023836
ENSMUSG00000020536.12	Llgl1	cKO_vs_wt	0.0687501	0.478028	-0.0957199	0.999978	-0.169644	0.622523	263.174	231.721	275.649	220.017
ENSMUSG00000024002.18	Brd4	cKO_vs_wt	0.0398414	0.747336	-0.00707324	0.999978	-0.0510648	0.99997	262.204	143.833	269.153	145.069
ENSMUSG00000027433.5	Xrn2	cKO_vs_wt	0.00420866	0.976455	-0.15377	0.999978	-0.161489	0.665027	262.124	214.541	262.433	194.969
ENSMUSG00000020048.13	Hsp90b1	cKO_vs_wt	-0.159067	0.766573	-0.0988363	0.999978	0.0568366	0.99997	262.286	351.959	234.225	331.948
ENSMUSG00000019370.10	Calm3	cKO_vs_wt	0.0672005	0.404965	-0.0201344	0.999978	-0.0922583	0.99997	259.781	426.332	271.749	425.366
ENSMUSG00000049804.9	Armcx4	cKO_vs_wt	-0.0645322	0.539856	-0.0783342	0.999978	-0.0190489	0.99997	260.752	73.3723	248.947	70.2917
ENSMUSG00000041571.9	Selenow	cKO_vs_wt	-0.0929115	0.563868	-0.0988891	0.999978	-0.00988554	0.99997	260.636	273.801	244.044	259.308
ENSMUSG00000063077.14	Kif1b	cKO_vs_wt	-0.0621279	0.727316	-0.0567712	0.999978	0.000300515	0.99997	259.612	311.579	248.357	303.072
ENSMUSG00000021709.14	Erbin	cKO_vs_wt	0.102466	0.333461	-0.00183202	0.999978	-0.109067	0.99997	260.046	113.353	278.766	114.181
ENSMUSG00000035133.9	Arhgap5	cKO_vs_wt	0.0459848	0.813185	-0.00121912	0.999978	-0.0518831	0.99997	259.289	152.367	267.203	153.463
ENSMUSG00000066568.12	Lsm14a	cKO_vs_wt	0.0494685	0.673964	0.01892	0.999978	-0.0336523	0.99997	258.937	217.315	267.656	222.482
ENSMUSG00000025503.5	Taldo1	cKO_vs_wt	-0.0785271	0.454696	0.0655708	0.999978	0.140309	0.99997	259.219	291.581	245.016	309.472
ENSMUSG00000019817.18	Plagl1	cKO_vs_wt	0.0319877	0.876771	0.00251181	0.999978	-0.0338559	0.99997	257.814	194.019	262.981	197.354
ENSMUSG00000028798.16	Eif3i	cKO_vs_wt	-0.0536791	0.727316	0.00982265	0.999978	0.0597594	0.99997	257.436	522.268	247.563	532.496
ENSMUSG00000028953.10	Abcf2	cKO_vs_wt	-0.00916739	0.958474	-0.118191	0.999978	-0.113179	0.99997	257.224	238.996	255.075	222.618
ENSMUSG00000030122.12	Ptms	cKO_vs_wt	0.0521124	0.630543	-0.178405	0.999978	-0.233846	0.69901	257.24	870.832	266.345	777.107
ENSMUSG00000078578.9	Ube2d3	cKO_vs_wt	0.0836013	0.265942	0.111882	0.999978	0.0224086	0.99997	253.289	91.6592	267.915	100.521
ENSMUSG00000015671.11	Psma2	cKO_vs_wt	-0.042297	0.764204	-0.0812228	0.999978	-0.0431427	0.99997	255.809	167.742	247.898	160.128
ENSMUSG00000019874.11	Fabp7	cKO_vs_wt	0.0358288	0.885943	0.130657	0.999978	0.0906155	0.99997	255.177	501.421	261.45	554.397
ENSMUSG00000027671.14	Actl6a	cKO_vs_wt	-0.0175869	0.895603	-0.0768611	0.999978	-0.0629204	0.99997	254.867	440.475	251.321	422.073
ENSMUSG00000028745.18	Capzb	cKO_vs_wt	0.0826402	0.180363	-0.0556301	0.999978	-0.142962	0.471	254.182	512.343	268.746	498.598
ENSMUSG00000020840.10	Blmh	cKO_vs_wt	-0.0709073	0.397249	-0.0494644	0.999978	0.0172824	0.99997	254.65	417.867	241.998	407.691
ENSMUSG00000030779.16	Rbbp6	cKO_vs_wt	-0.0283959	0.855536	-0.130281	0.999978	-0.105992	0.99997	254.243	103.555	248.882	95.7193
ENSMUSG00000025223.15	Ldb1	cKO_vs_wt	0.0476067	0.588753	0.0440114	0.999978	-0.00718738	0.99997	254.164	252.754	262.316	264.061
ENSMUSG00000026918.16	Brd3	cKO_vs_wt	-0.0299041	0.813185	0.0743673	0.999978	0.0984222	0.99997	253.359	163.739	247.873	174.527
ENSMUSG00000024811.11	Tnks2	cKO_vs_wt	-0.0138054	0.935836	-0.0591916	0.999978	-0.0506237	0.99997	253.559	163.732	250.994	158.59
ENSMUSG00000030867.7	Plk1	cKO_vs_wt	-0.0245897	0.885943	0.00511519	0.999978	0.0259075	0.99997	253.201	220.258	248.476	223.843
ENSMUSG00000029505.17	Ep400	cKO_vs_wt	-0.0231267	0.908786	-0.0073451	0.999978	0.0116015	0.99997	252.188	111.63	247.732	112.391
ENSMUSG00000019942.13	Cdk1	cKO_vs_wt	-0.012526	0.945766	-0.0406127	0.999978	-0.0333491	0.99997	250.449	635.605	247.785	625.057
ENSMUSG00000021413.9	Prpf4b	cKO_vs_wt	-0.00482513	0.981335	-0.11522	0.999978	-0.114254	0.99997	252.692	191.32	251.368	178.462
ENSMUSG00000034674.18	Tdg	cKO_vs_wt	-0.0130401	0.933004	-0.0348279	0.999978	-0.0210063	0.99997	235.449	7.73609	232.938	7.55016
ENSMUSG00000062683.11	Atp5g2	cKO_vs_wt	-0.128891	0.121276	-0.154194	0.999978	-0.0291339	0.99997	192.678	0.0295554	175.874	0.0350361
ENSMUSG00000020705.6	Ddx42	cKO_vs_wt	-0.00513221	0.974507	-0.0768692	0.999978	-0.0760468	0.99997	252.195	231.379	250.984	222.095
ENSMUSG00000042323.17	Pbrm1	cKO_vs_wt	-0.0142368	0.946702	-0.0423509	0.999978	-0.0326554	0.99997	252.16	191.947	249.438	188.452
ENSMUSG00000027193.12	Api5	cKO_vs_wt	0.112332	0.166826	-0.0517196	0.999978	-0.169763	0.916838	245.746	123.499	265.094	120.36
ENSMUSG00000020745.15	Pafah1b1	cKO_vs_wt	0.0239351	0.876771	-0.0877632	0.999978	-0.115579	0.99997	250.779	376.283	254.674	357.538
ENSMUSG00000032637.15	Atxn2l	cKO_vs_wt	0.0382127	0.729757	-0.0674962	0.999978	-0.110537	0.976019	250.316	211.011	256.536	203.971
ENSMUSG00000030016.14	Zfp638	cKO_vs_wt	0.0537974	0.693575	0.00340875	0.999978	-0.0542098	0.99997	249.747	145.114	258.811	146.851
ENSMUSG00000006398.15	Cdc20	cKO_vs_wt	0.147392	0.0070103	-0.0456662	0.999978	-0.198231	0.69616	249.974	301.173	276.369	294.833
ENSMUSG00000029147.11	Ppm1g	cKO_vs_wt	0.0862383	0.642644	-0.038772	0.999978	-0.129249	0.99997	249.693	322.228	264.762	316.368
ENSMUSG00000029191.16	Rfc1	cKO_vs_wt	-0.0590712	0.524396	-0.018296	0.999978	0.0355843	0.99997	249.148	157.392	238.868	156.802
ENSMUSG00000010097.15	Nxf1	cKO_vs_wt	-0.0419144	0.664306	-0.0210933	0.999978	0.017647	0.99997	248.985	259.991	241.434	258.801
ENSMUSG00000030224.10	Strap	cKO_vs_wt	0.0351659	0.795357	-0.00589389	0.999978	-0.0452449	0.99997	248.738	440.864	254.432	443.42
ENSMUSG00000066979.6	Bub3	cKO_vs_wt	-0.0959348	0.220763	-0.0131586	0.999978	0.0780762	0.99997	247.915	451.871	231.602	453.638
ENSMUSG00000000184.12	Ccnd2	cKO_vs_wt	0.165528	0.199344	0.0352512	0.999978	-0.1354	0.99997	248.46	1126.46	278.218	1167.64
ENSMUSG00000008892.12	Vdac3	cKO_vs_wt	0.0320117	0.803165	0.0558353	0.999978	0.0175885	0.99997	237.625	34.948	242.597	36.6783
ENSMUSG00000038374.10	Rbm8a	cKO_vs_wt	-0.0269996	0.882763	-0.0146053	0.999978	0.00882134	0.99997	247.988	193.317	242.89	194.12
ENSMUSG00000021039.9	Snw1	cKO_vs_wt	-0.0240368	0.873547	-0.046187	0.999978	-0.0265171	0.99997	247.869	298.956	243.283	292.834
ENSMUSG00000038965.17	Ube2l3	cKO_vs_wt	-0.00362477	0.98333	-0.110837	0.999978	-0.139898	0.99997	233.761	2.18431	232.79	2.09214
ENSMUSG00000027306.15	Nusap1	cKO_vs_wt	0.0105246	0.951664	-0.0568041	0.999978	-0.0707586	0.99997	247.524	289.017	248.847	280.63
ENSMUSG00000017478.15	Zc3h18	cKO_vs_wt	0.0580018	0.56154	-0.0720714	0.999978	-0.134488	0.917068	246.839	144.048	256.478	139.159
ENSMUSG00000044791.16	Setd2	cKO_vs_wt	0.0124658	0.958777	-0.106477	0.999978	-0.123411	0.99997	247.163	117.724	249.01	110.397
ENSMUSG00000042446.16	Zmym4	cKO_vs_wt	0.0106645	0.95031	-0.0626142	0.999978	-0.0768277	0.99997	247.016	161.682	248.625	156.392
ENSMUSG00000027455.16	Nsfl1c	cKO_vs_wt	-0.0443959	0.726991	-0.109584	0.999978	-0.0678446	0.99997	242.969	116.241	235.171	109.055
ENSMUSG00000021279.5	Cdc42bpb	cKO_vs_wt	-0.0725464	0.271968	0.00854437	0.999978	0.0778151	0.99997	246.19	149.372	233.783	151.884
ENSMUSG00000020267.6	Hint1	cKO_vs_wt	-0.0525203	0.767435	0.0848439	0.999978	0.133937	0.99997	246.02	242.048	236.801	260.657
ENSMUSG00000027170.12	Eif3m	cKO_vs_wt	-0.0140654	0.934834	-0.0677697	0.999978	-0.0577904	0.99997	245.612	182.138	242.702	175.552
ENSMUSG00000055612.15	Cdca7	cKO_vs_wt	-0.0489165	0.683379	0.0450027	0.999978	0.0896847	0.99997	245.363	278.533	236.838	290.731
ENSMUSG00000030541.16	Idh2	cKO_vs_wt	0.107439	0.0530207	-0.0242234	0.999978	-0.135858	0.646505	245.067	476.862	263.656	474.255
ENSMUSG00000024908.15	Ppp6r3	cKO_vs_wt	-0.0356285	0.783155	-0.0353088	0.999978	-0.00466578	0.99997	244.918	257.722	238.513	253.818
ENSMUSG00000027680.15	Fxr1	cKO_vs_wt	-0.0152361	0.901774	-0.0611032	0.999978	-0.0497976	0.99997	244.446	333.899	241.371	322.901
ENSMUSG00000046432.12	Bex3	cKO_vs_wt	-0.0216382	0.908457	-0.0245157	0.999978	-0.00730781	0.99997	244.2	309.915	240.148	309.3
ENSMUSG00000068036.15	Afdn	cKO_vs_wt	-0.0184012	0.938114	-0.136848	0.999978	-0.123317	0.99997	243.944	182.696	240.458	168.113
ENSMUSG00000033237.19	Arid2	cKO_vs_wt	-0.0309388	0.823795	-0.0544834	0.999978	-0.0290481	0.99997	243.886	123.372	238.361	120.385
ENSMUSG00000053565.10	Eif3k	cKO_vs_wt	-0.145434	0.0192533	0.0319968	0.999978	0.173972	0.412725	244.12	574.924	220.367	594.913
ENSMUSG00000030751.18	Psma1	cKO_vs_wt	-0.0622588	0.650197	-0.0400667	0.999978	0.0173255	0.99997	244.116	473.116	233.393	464.376
ENSMUSG00000021486.7	Prelid1	cKO_vs_wt	0.271905	3.48877e-07	0.00188136	0.999978	-0.279424	0.351726	234.723	30.1212	282.943	30.7469
ENSMUSG00000038482.11	Tfdp1	cKO_vs_wt	0.0114073	0.934448	-0.105144	0.999978	-0.121814	0.99997	240.612	29.3264	242.209	27.5478
ENSMUSG00000020935.8	Dcakd	cKO_vs_wt	-0.047589	0.724695	0.0239158	0.999978	0.0672293	0.99997	242.384	793.008	234.15	817.071
ENSMUSG00000106864.3	Gtf3c2	cKO_vs_wt	-0.0201915	0.886261	-0.0840458	0.999978	-0.0678929	0.99997	242.312	160.293	238.692	153.335
ENSMUSG00000031672.8	Got2	cKO_vs_wt	-0.109975	0.108145	-0.0480397	0.999978	0.0581081	0.99997	237.589	109.543	219.761	107.519
ENSMUSG00000028156.12	Eif4e	cKO_vs_wt	0.00756184	0.964109	0.145218	0.999978	0.132339	0.99997	241.766	75.5265	242.714	84.4717
ENSMUSG00000024095.15	Hnrnpll	cKO_vs_wt	0.0486443	0.647034	-0.0454803	0.999978	-0.0970113	0.99997	242.073	380.566	249.947	372.693
ENSMUSG00000078941.9	Ak6	cKO_vs_wt	0.00899961	0.96267	-0.0998717	0.999978	-0.112915	0.99997	234.492	168.761	235.556	159.105
ENSMUSG00000020089.8	Ppa1	cKO_vs_wt	0.139518	0.0196856	0.000888156	0.999978	-0.144935	0.980438	241.918	270.778	265.91	273.849
ENSMUSG00000001441.13	Npepps	cKO_vs_wt	-0.0121735	0.923266	-0.0436741	0.999978	-0.035614	0.99997	241.599	235.872	239.231	231.312
ENSMUSG00000037601.11	Nme1	cKO_vs_wt	-0.0752276	0.553651	-0.0736319	0.999978	-0.00257532	0.99997	240.959	639.53	228.328	614.101
ENSMUSG00000004530.12	Coro1c	cKO_vs_wt	-0.0205343	0.883484	-0.0746825	0.999978	-0.0586699	0.99997	237.767	314.427	233.968	302.124
ENSMUSG00000018326.9	Ywhab	cKO_vs_wt	-0.0405556	0.699554	-0.0681769	0.999978	-0.031304	0.99997	241.604	634.462	234.49	611.627
ENSMUSG00000022678.16	Nde1	cKO_vs_wt	-0.0548168	0.512191	0.0144386	0.999978	0.0651233	0.99997	241.587	234.337	232.137	239.72
ENSMUSG00000070319.6	Eif3g	cKO_vs_wt	0.0471007	0.709871	0.0524273	0.999978	0.00105238	0.99997	241.445	556.139	248.933	584.157
ENSMUSG00000024012.18	Mtch1	cKO_vs_wt	-0.0297148	0.833801	-0.11904	0.999978	-0.0933544	0.99997	241.211	299.156	235.998	279.138
ENSMUSG00000032479.15	Map4	cKO_vs_wt	0.0132343	0.931546	0.00726158	0.999978	-0.0106403	0.99997	240.512	229.751	242.453	234.612
ENSMUSG00000029823.16	Luc7l2	cKO_vs_wt	-0.0531064	0.57649	-0.122693	0.999978	-0.0735967	0.99997	238.652	274.225	229.614	254.51
ENSMUSG00000049532.11	Sall2	cKO_vs_wt	-0.12574	0.0488209	-0.035875	0.999978	0.0855735	0.99997	239.353	189.491	219.111	187.43
ENSMUSG00000005625.15	Psmd4	cKO_vs_wt	-0.0171161	0.915824	0.00684964	0.999978	0.0200165	0.99997	239.483	516.791	236.196	526.152
ENSMUSG00000014226.10	Cacybp	cKO_vs_wt	0.113451	0.224104	0.0379838	0.999978	-0.0791232	0.99997	239.236	141.186	258.359	146.629
ENSMUSG00000024968.14	Rcor2	cKO_vs_wt	0.331186	1.03802e-10	-0.129355	0.999978	-0.464413	0.000484634	239.183	252.104	300.578	233.555
ENSMUSG00000031078.15	Cttn	cKO_vs_wt	-0.0858968	0.255363	-0.0767677	0.999978	0.00738677	0.99997	238.631	197.632	224.562	189.125
ENSMUSG00000020608.7	Smc6	cKO_vs_wt	0.0545496	0.614401	-0.0895304	0.999978	-0.147421	0.99997	237.603	174.343	246.38	165.323
ENSMUSG00000034403.16	Pja1	cKO_vs_wt	-0.0482276	0.698989	-0.0906098	0.999978	-0.0454479	0.99997	238.14	292.081	229.942	277.246
ENSMUSG00000026356.15	Dars	cKO_vs_wt	0.0510702	0.709093	-0.0295575	0.999978	-0.0848087	0.99997	238.008	342.877	246.106	339.145
ENSMUSG00000001472.17	Tcf25	cKO_vs_wt	-0.00778831	0.959665	-0.0167679	0.999978	-0.0129513	0.99997	237.777	209.506	236.223	209.886
ENSMUSG00000021012.16	Zc3h14	cKO_vs_wt	0.178155	0.00188128	-0.130845	0.999978	-0.313615	0.0369181	236.993	93.8105	267.916	86.4946
ENSMUSG00000023852.14	Chd1	cKO_vs_wt	0.0131347	0.930239	-0.0517666	0.999978	-0.0687792	0.99997	237.225	184.899	239.01	180.27
ENSMUSG00000058672.7	Tubb2a	cKO_vs_wt	-0.115236	0.288627	-0.0707688	0.999978	0.0393686	0.99997	109.459	79.0679	100.939	76.093
ENSMUSG00000025487.15	Psmd13	cKO_vs_wt	-0.029295	0.851503	0.00382228	0.999978	0.0297871	0.99997	236.525	398.747	231.384	404.859
ENSMUSG00000007039.12	Ddah2	cKO_vs_wt	0.0262362	0.883484	-0.02596	0.999978	-0.0551676	0.99997	236	374.157	240.012	372.506
ENSMUSG00000059552.13	Trp53	cKO_vs_wt	-0.0878551	0.328162	-0.0617608	0.999978	0.0216134	0.99997	235.169	198.187	220.826	192.285
ENSMUSG00000022201.16	Zfr	cKO_vs_wt	-0.0228568	0.882364	-0.0669163	0.999978	-0.0474825	0.99997	234.48	222.681	230.535	214.847
ENSMUSG00000033326.15	Kdm4a	cKO_vs_wt	-0.0497904	0.567482	-0.0606173	0.999978	-0.0145937	0.99997	235.124	247.032	226.799	239.684
ENSMUSG00000020661.15	Dnmt3a	cKO_vs_wt	-0.0145273	0.925055	0.0174363	0.999978	0.0273443	0.99997	234.284	181.128	231.557	185.799
ENSMUSG00000038369.14	Ncoa6	cKO_vs_wt	-0.0850876	0.320542	-0.00829076	0.999978	0.0730285	0.99997	234.967	62.9514	221.253	63.3897
ENSMUSG00000059878.12	Zfp422	cKO_vs_wt	-0.0663053	0.424774	-0.00887626	0.999978	0.0519511	0.99997	235.044	72.6682	224.069	73.2885
ENSMUSG00000021037.7	Ahsa1	cKO_vs_wt	0.0110097	0.944683	-0.137775	0.999978	-0.153013	0.844378	234.327	389.689	235.71	358.441
ENSMUSG00000027091.14	Zc3h15	cKO_vs_wt	0.130621	0.00633817	0.0327766	0.999978	-0.102091	0.99997	232.835	137.969	254.415	142.376
ENSMUSG00000025134.2	Alyref	cKO_vs_wt	-0.0239981	0.89991	-0.081128	0.999978	-0.0621247	0.99997	233.811	909.754	229.352	869.633
ENSMUSG00000052707.8	Tnrc6a	cKO_vs_wt	-0.0699184	0.522148	-0.0413548	0.999978	0.0255812	0.99997	233.922	61.7782	222.55	60.446
ENSMUSG00000022957.20	Itsn1	cKO_vs_wt	-0.0330779	0.784996	-0.0967195	0.999978	-0.0691105	0.99997	233.498	111.239	228.011	105.41
ENSMUSG00000040681.16	Hmgn1	cKO_vs_wt	0.444154	3.54689e-10	0.366174	0.999978	-0.0835612	0.99997	232.686	47.8469	316.092	62.9517
ENSMUSG00000025220.8	Oga	cKO_vs_wt	0.0546143	0.594337	0.0222252	0.999978	-0.0346666	0.99997	233.198	234.573	241.887	240.505
ENSMUSG00000031575.18	Ash2l	cKO_vs_wt	0.0623747	0.41797	0.00484557	0.999978	-0.0611679	0.99997	233.338	249.559	243.187	253.851
ENSMUSG00000038014.7	Fam120a	cKO_vs_wt	-0.0697714	0.319517	-0.0358741	0.999978	0.0258746	0.99997	232.983	93.6338	221.641	92.8216
ENSMUSG00000026491.13	Ahctf1	cKO_vs_wt	0.0282127	0.870536	0.00104439	0.999978	-0.0309142	0.99997	232.995	157.545	237.392	159.179
ENSMUSG00000039419.17	Cntnap2	cKO_vs_wt	-0.131071	0.286381	-0.00234369	0.999978	0.124556	0.99997	231.619	187.568	210.985	189.404
ENSMUSG00000026915.16	Strbp	cKO_vs_wt	0.128942	0.0991425	-0.0231973	0.999978	-0.157129	0.948314	231.794	166.497	253.039	165.543
ENSMUSG00000044783.16	Hjurp	cKO_vs_wt	-0.0748503	0.441173	0.00391553	0.999978	0.0746616	0.99997	230.973	176.672	219.145	179.135
ENSMUSG00000022010.19	Tsc22d1	cKO_vs_wt	0.0885288	0.300723	-0.0374325	0.999978	-0.130117	0.948314	231.45	288.86	245.749	284.714
ENSMUSG00000031826.20	Usp10	cKO_vs_wt	-0.0275468	0.883101	0.0175283	0.999978	0.0412408	0.99997	231.266	194.237	226.614	199.107
ENSMUSG00000017428.16	Psmd11	cKO_vs_wt	-0.092396	0.206583	-0.0268125	0.999978	0.060234	0.99997	231.496	158.502	216.848	157.759
ENSMUSG00000020978.10	Klhdc2	cKO_vs_wt	0.116449	0.00900069	0.00836352	0.999978	-0.113093	0.935695	231.424	263.567	250.564	268.107
ENSMUSG00000027018.11	Hat1	cKO_vs_wt	-0.00157201	0.993664	-0.00731132	0.999978	-0.0099816	0.99997	231.133	373.162	230.432	374.603
ENSMUSG00000028433.14	Ubap2	cKO_vs_wt	0.035334	0.803202	-0.0582101	0.999978	-0.0973669	0.99997	230.906	188.724	236.297	183.563
ENSMUSG00000038256.15	Bcl9	cKO_vs_wt	-0.0960622	0.16282	0.019008	0.999978	0.107871	0.99997	230.926	65.671	215.789	67.6465
ENSMUSG00000022390.11	Zc3h7b	cKO_vs_wt	0.0171479	0.919931	0.0472737	0.999978	0.0243122	0.99997	230.341	116.468	232.78	122.298
ENSMUSG00000022607.17	Ptk2	cKO_vs_wt	-0.0142006	0.921808	-0.0573036	0.999978	-0.0470339	0.99997	229.761	147.421	227.254	143.163
ENSMUSG00000028676.17	Srsf10	cKO_vs_wt	0.162347	0.00280421	0.0470836	0.999978	-0.121041	0.99997	227.995	54.7993	254.692	57.2057
ENSMUSG00000029705.17	Cux1	cKO_vs_wt	-0.0828145	0.483136	0.0688647	0.999978	0.14628	0.894457	229.165	115.638	216.086	122.914
ENSMUSG00000003868.14	Ruvbl2	cKO_vs_wt	0.00675168	0.963705	-0.0784636	0.999978	-0.0892432	0.99997	228.325	344.144	228.957	329.486
ENSMUSG00000068749.9	Psma5	cKO_vs_wt	-0.0515993	0.690854	0.0415432	0.999978	0.0956571	0.99997	228.124	13.1362	219.775	13.5432
ENSMUSG00000031954.6	Cfdp1	cKO_vs_wt	0.0113489	0.949446	-0.00944216	0.999978	-0.0255578	0.99997	227.061	273.135	228.394	274.455
ENSMUSG00000036202.16	Rif1	cKO_vs_wt	0.0617767	0.64228	0.0134313	0.999978	-0.0528289	0.99997	227.696	178.383	237.242	182.4
ENSMUSG00000020720.13	Psmd12	cKO_vs_wt	0.00594179	0.966604	0.0140773	0.999978	0.00397176	0.99997	228.084	349.422	228.609	356.557
ENSMUSG00000033712.6	Ccar2	cKO_vs_wt	-0.0573604	0.546929	-0.114301	0.999978	-0.0607961	0.99997	227.665	247.771	218.547	231.84
ENSMUSG00000034021.15	Pds5b	cKO_vs_wt	-0.0516271	0.722979	-0.0327403	0.999978	0.0145741	0.99997	227.642	208.348	219.27	206.028
ENSMUSG00000028961.15	Pgd	cKO_vs_wt	-0.0546275	0.658034	-0.0481124	0.999978	0.0018138	0.99997	227.772	351.616	218.88	344.039
ENSMUSG00000001403.13	Ube2c	cKO_vs_wt	0.604851	1.91297e-15	0.0595182	0.999978	-0.551079	0.00127718	226.208	470.902	343.004	497.955
ENSMUSG00000034022.8	Cpsf1	cKO_vs_wt	-0.0326503	0.772647	-0.0688558	0.999978	-0.0391761	0.99997	227.625	183.994	222.212	178.074
ENSMUSG00000022241.6	Tars	cKO_vs_wt	-0.0150663	0.920283	0.0120279	0.999978	0.02311	0.99997	226.327	237.691	223.534	242.714
ENSMUSG00000021262.15	Evl	cKO_vs_wt	-0.00290675	0.987466	-0.0107209	0.999978	-0.0151054	0.99997	226.856	37.161	226.228	37.5558
ENSMUSG00000036667.14	Tcaf1	cKO_vs_wt	-0.0735756	0.279191	-0.059996	0.999978	0.00970385	0.99997	226.757	292.052	215.25	283.485
ENSMUSG00000023932.9	Cdc5l	cKO_vs_wt	-0.0356881	0.81662	-0.149978	0.999978	-0.117439	0.99997	224.348	112.537	218.41	102.569
ENSMUSG00000031696.9	Vps35	cKO_vs_wt	0.0121558	0.935647	-0.0587183	0.999978	-0.0750021	0.99997	226.378	341.071	227.917	330.905
ENSMUSG00000036751.7	Cox6b1	cKO_vs_wt	-0.063731	0.729802	0.165238	0.999978	0.226821	0.843809	226.691	233.574	216.454	265.166
ENSMUSG00000074698.10	Csnk2a1	cKO_vs_wt	0.0454572	0.722979	0.0556207	0.999978	0.0292973	0.99997	213.091	3.46357	219.559	3.55108
ENSMUSG00000036591.16	Arhgap21	cKO_vs_wt	0.0559327	0.7335	-0.0806681	0.999978	-0.140832	0.99997	226.525	67.5774	235.347	64.5935
ENSMUSG00000028964.14	Park7	cKO_vs_wt	-0.0948432	0.402959	-0.00640719	0.999978	0.0847861	0.99997	226.419	403.712	211.649	406.933
ENSMUSG00000021811.7	Dnajc9	cKO_vs_wt	0.142547	0.0155456	-0.0978604	0.999978	-0.244344	0.233113	226.11	475.599	249.028	449.544
ENSMUSG00000050812.18	Ecpas	cKO_vs_wt	0.0356961	0.80053	0.023353	0.999978	-0.0157553	0.99997	225.965	201.32	231.296	206.887
ENSMUSG00000060073.9	Psma3	cKO_vs_wt	-0.0262947	0.870536	0.0727559	0.999978	0.0936733	0.99997	225.182	23.429	220.771	24.9545
ENSMUSG00000027968.11	Larp7	cKO_vs_wt	-0.0393595	0.796461	-0.106089	0.999978	-0.0699984	0.99997	223.321	110.827	217.017	103.998
ENSMUSG00000031665.7	Sall1	cKO_vs_wt	-0.126784	0.237497	-0.0354806	0.999978	0.0883146	0.99997	224.809	126.853	205.39	125.525
ENSMUSG00000009575.14	Cbx5	cKO_vs_wt	-0.0971878	0.312492	-0.0804148	0.999978	0.011532	0.99997	224.604	682.371	209.654	650.997
ENSMUSG00000034120.18	Srsf2	cKO_vs_wt	0.376354	3.26454e-12	-0.0987605	0.999978	-0.478681	0.0734264	224.46	902.001	290.677	857.551
ENSMUSG00000095567.8	Noc2l	cKO_vs_wt	0.0263389	0.863114	-0.0116452	0.999978	-0.0414621	0.99997	224.365	285.913	228.139	287.391
ENSMUSG00000042548.14	Asxl1	cKO_vs_wt	-0.0254113	0.860608	-0.0714217	0.999978	-0.0499726	0.99997	223.958	117.562	219.69	113.173
ENSMUSG00000028580.15	Pum1	cKO_vs_wt	-0.149891	0.00257897	-0.0672653	0.999978	0.0784352	0.99997	223.682	227.786	201.356	220.064
ENSMUSG00000007817.15	Zmiz1	cKO_vs_wt	0.0393769	0.80136	-0.0225645	0.999978	-0.0662412	0.99997	223.87	157.165	229.831	156.74
ENSMUSG00000000902.13	Smarcb1	cKO_vs_wt	0.0446639	0.700288	-0.0201485	0.999978	-0.0695837	0.99997	223.788	482.125	230.531	481.456
ENSMUSG00000021595.18	Nsun2	cKO_vs_wt	0.0495723	0.689447	-0.0243037	0.999978	-0.077534	0.99997	223.92	233.925	231.362	232.417
ENSMUSG00000027379.13	Bub1	cKO_vs_wt	0.0369927	0.751075	0.0197016	0.999978	-0.0200324	0.99997	223.353	90.9957	228.778	93.1524
ENSMUSG00000092035.8	Peg10	cKO_vs_wt	-0.18437	0.225486	-0.11947	0.999978	0.0587387	0.99997	222.814	314.846	195.924	292.679
ENSMUSG00000101678.3	Gm29609	cKO_vs_wt	-0.0266674	0.845696	-0.084509	0.999978	-0.0618238	0.99997	223.23	153.985	218.891	147.247
ENSMUSG00000020532.18	Acaca	cKO_vs_wt	0.00486542	0.983699	-0.0820386	0.999978	-0.0914757	0.99997	209.492	65.8544	209.923	62.8194
ENSMUSG00000050148.9	Ubqln2	cKO_vs_wt	0.0522142	0.733504	0.0697553	0.999978	0.0137921	0.99997	221.702	519.583	229.564	553.19
ENSMUSG00000024483.19	Ankhd1	cKO_vs_wt	-0.00787316	0.961673	0.0233227	0.999978	0.0276801	0.99997	222.821	182.018	221.254	187.419
ENSMUSG00000032803.15	Cdv3	cKO_vs_wt	0.0595359	0.526892	0.106531	0.999978	0.0443476	0.99997	218.251	117.767	227.135	129.311
ENSMUSG00000015697.14	Setdb1	cKO_vs_wt	-0.000245962	0.998481	-0.00584727	0.999978	-0.00963053	0.99997	219.74	173.987	219.55	175.237
ENSMUSG00000052337.15	Immt	cKO_vs_wt	-0.00257383	0.987466	-0.054537	0.999978	-0.0556777	0.99997	222.465	262.5	221.781	255.27
ENSMUSG00000030677.8	Kif22	cKO_vs_wt	-0.0684395	0.494622	-0.0700985	0.999978	-0.00561468	0.99997	222.54	287.129	211.885	276.781
ENSMUSG00000029814.10	Igf2bp3	cKO_vs_wt	0.0572866	0.683088	-0.0226047	0.999978	-0.0847412	0.99997	222.406	284.608	231.037	283.732
ENSMUSG00000023018.5	Smarcd1	cKO_vs_wt	-0.0403517	0.66902	-0.0143917	0.999978	0.0210837	0.99997	222.25	275.204	215.745	275.731
ENSMUSG00000026473.16	Glul	cKO_vs_wt	-0.0540007	0.581396	-0.0129807	0.999978	0.0364577	0.99997	222.123	101.053	213.828	101.228
ENSMUSG00000049751.6	Rpl36al	cKO_vs_wt	-0.0637378	0.626684	-0.145377	0.999978	-0.0860356	0.99997	202.563	52.8406	193.477	48.1604
ENSMUSG00000021116.10	Eif2s1	cKO_vs_wt	0.0107024	0.952935	-0.0470624	0.999978	-0.0613257	0.99997	221.783	154.827	223.013	151.227
ENSMUSG00000014769.10	Psmb1	cKO_vs_wt	-0.037023	0.823795	0.0264645	0.999978	0.0602141	0.99997	221.344	494.665	215.302	510.356
ENSMUSG00000026790.19	Odf2	cKO_vs_wt	0.00368098	0.984764	-0.0468431	0.999978	-0.0549986	0.99997	221.999	205.666	222.165	201.35
ENSMUSG00000105204.1	Gm43738	cKO_vs_wt	-0.119965	0.178434	0.165536	0.999978	0.27934	0.3473	218.593	30.4687	200.87	34.8336
ENSMUSG00000042700.16	Sipa1l1	cKO_vs_wt	0.00332647	0.987164	-0.051331	0.999978	-0.059054	0.99997	221.193	48.5489	221.442	47.3092
ENSMUSG00000038611.17	Phrf1	cKO_vs_wt	-0.0392087	0.704218	-0.0678428	0.999978	-0.0324772	0.99997	221.494	134.954	215.23	130.206
ENSMUSG00000017221.14	Psmd3	cKO_vs_wt	-0.0211825	0.876971	-0.0436333	0.999978	-0.0267965	0.99997	221.369	359.107	217.735	353.092
ENSMUSG00000007411.16	Mark3	cKO_vs_wt	0.0104541	0.946575	-0.017271	0.999978	-0.0319012	0.99997	220.79	126.647	222.131	126.462
ENSMUSG00000018567.14	Gabarap	cKO_vs_wt	0.041558	0.727316	0.0211374	0.999978	-0.0243213	0.99997	220.676	394.591	226.704	405.666
ENSMUSG00000030058.17	Copg1	cKO_vs_wt	-0.116641	0.0426059	-0.0860725	0.999978	0.0281502	0.99997	221.118	285.956	203.693	272.348
ENSMUSG00000074781.5	Ube2n	cKO_vs_wt	-0.0760739	0.518563	-0.0857935	0.999978	0.0256191	0.99997	181.773	0.269677	172.166	0.243961
ENSMUSG00000057335.11	Cep170	cKO_vs_wt	-0.0646833	0.647034	-0.120582	0.999978	-0.0610243	0.99997	220.633	188.311	210.716	174.877
ENSMUSG00000039067.5	Psmd7	cKO_vs_wt	0.0461671	0.680347	-0.0307265	0.999978	-0.0820694	0.99997	220.696	356.743	227.551	353.469
ENSMUSG00000035901.14	Dennd5a	cKO_vs_wt	0.0220741	0.895336	-0.0100268	0.999978	-0.0369334	0.99997	220.521	52.2928	223.774	52.4966
ENSMUSG00000091537.2	Tma7	cKO_vs_wt	-0.217786	0.0555496	-0.56063	0.999978	-0.345091	0.99997	217.462	13.1997	186.468	9.09414
ENSMUSG00000032612.14	Usp4	cKO_vs_wt	-0.0369518	0.7319	-0.0435552	0.999978	-0.0106545	0.99997	219.962	222.442	214.113	218.195
ENSMUSG00000032118.16	Fez1	cKO_vs_wt	-0.0156081	0.946702	-0.104707	0.999978	-0.0918163	0.99997	219.476	311.739	216.765	293.567
ENSMUSG00000039735.15	Fnbp1l	cKO_vs_wt	0.0370339	0.81721	0.000144164	0.999978	-0.0414405	0.99997	219.68	258.046	225.077	260.812
ENSMUSG00000030884.12	Uqcrc2	cKO_vs_wt	-0.0316856	0.771573	-0.000848037	0.999978	0.0261451	0.99997	218.875	384.271	213.836	388.172
ENSMUSG00000038416.15	Cdc16	cKO_vs_wt	0.024728	0.826054	0.00280637	0.999978	-0.0261374	0.99997	219.605	232.034	223.085	234.895
ENSMUSG00000002835.9	Chaf1a	cKO_vs_wt	-0.0499419	0.696307	-0.107057	0.999978	-0.0604611	0.99997	219.457	160.398	211.754	150.517
ENSMUSG00000013921.15	Clip3	cKO_vs_wt	-0.0331146	0.802957	-0.0527111	0.999978	-0.0235368	0.99997	217.846	291.557	212.628	284.797
ENSMUSG00000004535.12	Tax1bp1	cKO_vs_wt	0.0168669	0.919442	-0.0567618	0.999978	-0.0770882	0.99997	218.887	202.931	221.079	196.753
ENSMUSG00000038545.13	Cul7	cKO_vs_wt	-0.0613038	0.377685	-0.118984	0.999978	-0.0607643	0.99997	218.826	192.273	209.361	179.182
ENSMUSG00000024767.11	Otub1	cKO_vs_wt	-0.0532515	0.617302	0.0178564	0.999978	0.0672799	0.99997	218.039	456.953	209.82	469.149
ENSMUSG00000048874.15	Phf3	cKO_vs_wt	0.0346845	0.801404	-0.0495629	0.999978	-0.0884473	0.99997	215.252	114.045	220.189	111.312
ENSMUSG00000075592.10	Nynrin	cKO_vs_wt	-0.0884561	0.303655	-0.0103113	0.999978	0.07368	0.99997	217.8	172.269	204.577	173.39
ENSMUSG00000053470.13	Kdm3a	cKO_vs_wt	-0.102891	0.454702	-0.131096	0.999978	-0.0318459	0.99997	217.655	193.052	202.38	178.219
ENSMUSG00000054405.14	Dnajc8	cKO_vs_wt	-0.00781867	0.960983	-0.029938	0.999978	-0.0266812	0.99997	217.093	162.052	215.583	160.235
ENSMUSG00000032212.10	Sltm	cKO_vs_wt	0.0644925	0.467098	-0.0327924	0.999978	-0.101583	0.99997	217.423	181.516	226.887	180.009
ENSMUSG00000002833.11	Hdgfl2	cKO_vs_wt	0.00602378	0.967748	-0.0315061	0.999978	-0.0414441	0.99997	217.221	281.889	217.711	279.464
ENSMUSG00000060860.8	Ube2s	cKO_vs_wt	0.0381485	0.782659	0.0746267	0.999978	0.0340768	0.99997	158.062	65.363	162.007	69.6359
ENSMUSG00000020152.7	Actr2	cKO_vs_wt	-0.0442779	0.659763	-0.0338292	0.999978	0.00603702	0.99997	216.336	418.638	209.474	413.497
ENSMUSG00000031403.14	Dkc1	cKO_vs_wt	0.0115594	0.955118	-0.016544	0.999978	-0.0333113	0.99997	215.816	217.891	217.143	217.552
ENSMUSG00000059409.9	Ppp2r5d	cKO_vs_wt	-0.0113718	0.931487	-0.0246252	0.999978	-0.0172526	0.99997	215.789	236.034	213.801	234.851
ENSMUSG00000061479.15	Snrpa	cKO_vs_wt	0.187678	0.000922462	-0.16877	0.999978	-0.360993	0.0366941	215.605	131.965	244.952	119.116
ENSMUSG00000042557.14	Sin3a	cKO_vs_wt	-0.0791582	0.199912	-0.0747417	0.999978	0.00209435	0.99997	215.341	161.196	203.541	154.635
ENSMUSG00000000131.15	Xpo6	cKO_vs_wt	-0.103082	0.0845984	-0.00330849	0.999978	0.0931515	0.99997	214.54	85.6952	199.467	86.7874
ENSMUSG00000021877.12	Arf4	cKO_vs_wt	0.0921245	0.210789	0.0127262	0.999978	-0.0838632	0.99997	214.879	606.394	228.695	618.145
ENSMUSG00000026914.15	Psmd14	cKO_vs_wt	0.073331	0.477983	0.0421528	0.999978	-0.0358913	0.99997	214.417	429.644	225.159	446.128
ENSMUSG00000055024.12	Ep300	cKO_vs_wt	-0.0198411	0.922275	-0.085139	0.999978	-0.0693076	0.99997	214.305	98.3455	211.139	93.7613
ENSMUSG00000019373.11	Cops3	cKO_vs_wt	0.0183807	0.924421	-0.083525	0.999978	-0.105451	0.99997	213.936	281.574	216.201	268.783
ENSMUSG00000028633.7	Ctps	cKO_vs_wt	0.0258297	0.870536	0.00759825	0.999978	-0.021658	0.99997	213.941	222.43	217.385	225.801
ENSMUSG00000032939.14	Nup93	cKO_vs_wt	-0.0498428	0.616393	-0.00945499	0.999978	0.03618	0.99997	213.784	395.658	206.181	397.807
ENSMUSG00000002265.16	Peg3	cKO_vs_wt	-0.051305	0.901473	-0.0461857	0.999978	-0.000386068	0.99997	213.635	221.026	206.047	216.539
ENSMUSG00000027770.5	Dhx36	cKO_vs_wt	0.0363512	0.795695	0.002596	0.999978	-0.0370416	0.99997	213.506	258.416	218.639	261.46
ENSMUSG00000006304.14	Arpc2	cKO_vs_wt	0.158816	0.000363616	-0.0558629	0.999978	-0.218831	0.296047	212.627	328.728	236.944	320.541
ENSMUSG00000032096.16	Arcn1	cKO_vs_wt	0.0620337	0.472092	-0.0540992	0.999978	-0.118929	0.99997	212.567	167.225	221.594	162.554
ENSMUSG00000043384.15	Gprasp1	cKO_vs_wt	0.0227129	0.885964	-0.0294846	0.999978	-0.056675	0.99997	212.759	184.194	215.925	182.248
ENSMUSG00000033737.14	Fndc3c1	cKO_vs_wt	-0.0248771	0.901473	0.00948829	0.999978	0.0294305	0.99997	209.945	85.1708	205.948	86.6886
ENSMUSG00000039128.13	Cdc123	cKO_vs_wt	0.0285309	0.801857	0.0501243	0.999978	0.0179792	0.99997	212.308	312.616	216.122	327.012
ENSMUSG00000049401.10	Ogfr	cKO_vs_wt	0.0186009	0.881355	0.0137597	0.999978	-0.00957187	0.99997	211.902	199.281	214.324	203.871
ENSMUSG00000090553.8	Snrpe	cKO_vs_wt	-0.0522225	0.815121	-0.0706828	0.999978	-0.0234481	0.99997	211.8	146.496	203.94	141.634
ENSMUSG00000030138.8	Bms1	cKO_vs_wt	-0.0252165	0.864341	-0.115226	0.999978	-0.0948017	0.99997	211.751	173.28	207.657	161.836
ENSMUSG00000039367.11	Sec24c	cKO_vs_wt	-0.089209	0.214523	-0.0594645	0.999978	0.025257	0.99997	211.368	190.573	198.485	185.128
ENSMUSG00000027304.9	Rtf1	cKO_vs_wt	0.0319105	0.811282	-0.0520994	0.999978	-0.0870816	0.99997	211.362	185.822	215.699	181.28
ENSMUSG00000007080.14	Pole	cKO_vs_wt	-0.0369088	0.7335	-0.0536779	0.999978	-0.0207819	0.99997	211.059	217.455	205.437	211.878
ENSMUSG00000039221.10	Rpl22l1	cKO_vs_wt	0.0229215	0.91668	-0.0611779	0.999978	-0.088413	0.99997	210.101	103.479	213.081	100.329
ENSMUSG00000037197.11	Rbm17	cKO_vs_wt	0.0798176	0.321765	-0.0693777	0.999978	-0.153603	0.86408	210.987	105.471	222.613	101.932
ENSMUSG00000059743.12	Fdps	cKO_vs_wt	-0.134178	0.135332	0.0563109	0.999978	0.185779	0.948314	207.837	22.6966	189.102	24.0351
ENSMUSG00000052397.8	Ezr	cKO_vs_wt	-0.0147953	0.960864	0.00273305	0.999978	0.0124547	0.99997	210.918	300.352	208.396	304.36
ENSMUSG00000002957.11	Ap2a2	cKO_vs_wt	0.0450163	0.71331	-0.0620051	0.999978	-0.11147	0.99997	208.737	208.026	215.11	202.185
ENSMUSG00000024501.20	Dpysl3	cKO_vs_wt	-0.0149596	0.952059	-0.0224832	0.999978	-0.0119691	0.99997	210.076	306.539	207.891	305.603
ENSMUSG00000070348.5	Ccnd1	cKO_vs_wt	0.0942228	0.57514	-0.0224636	0.999978	-0.120565	0.99997	209.977	757.981	223.934	756.164
ENSMUSG00000013415.9	Igf2bp1	cKO_vs_wt	0.0273747	0.875897	-0.0818357	0.999978	-0.113749	0.99997	208.229	638.968	211.946	611.797
ENSMUSG00000031060.16	Rbm10	cKO_vs_wt	0.0293135	0.81662	0.173599	0.999978	0.145342	0.99997	208.838	16.2983	212.775	18.4961
ENSMUSG00000070923.4	Klhl9	cKO_vs_wt	-0.0264193	0.853375	-0.0820364	0.999978	-0.0600571	0.99997	209.664	407.808	205.589	389.075
ENSMUSG00000040720.15	Virma	cKO_vs_wt	-0.0452867	0.696313	-0.0913783	0.999978	-0.0494152	0.99997	209.605	225.733	202.863	214.236
ENSMUSG00000025651.14	Uqcrc1	cKO_vs_wt	0.0634763	0.500372	-0.0558427	0.999978	-0.123831	0.751749	209.404	450.93	218.537	439.008
ENSMUSG00000038773.11	Kdm3b	cKO_vs_wt	-0.0849039	0.241557	-0.0620649	0.999978	0.0186344	0.99997	209.201	141.381	196.981	136.972
ENSMUSG00000037331.15	Larp1	cKO_vs_wt	0.0829883	0.236785	-0.0502863	0.999978	-0.138034	0.957276	209.048	82.4127	221.129	80.6834
ENSMUSG00000024640.9	Psat1	cKO_vs_wt	0.0894418	0.357511	0.127483	0.999978	0.0335717	0.99997	208.958	381.089	221.971	421.087
ENSMUSG00000068856.3	Sf3b4	cKO_vs_wt	0.1047	0.318999	0.0897784	0.999978	-0.0219946	0.99997	195.204	42.0002	209.421	45.4133
ENSMUSG00000056758.14	Hmga2	cKO_vs_wt	0.0919884	0.623449	-0.0112929	0.999978	-0.108448	0.99997	208.538	59.7214	221.624	60.0386
ENSMUSG00000027206.13	Cops2	cKO_vs_wt	-0.00969225	0.960864	-0.0234916	0.999978	-0.0190244	0.99997	208.833	200.457	207.005	199.432
ENSMUSG00000035325.16	Sec31a	cKO_vs_wt	0.0343175	0.717785	-0.0327512	0.999978	-0.0708036	0.99997	208.875	220.03	213.571	217.705
ENSMUSG00000028409.11	Smu1	cKO_vs_wt	-0.0142712	0.922161	-0.0540066	0.999978	-0.043851	0.99997	208.717	434.496	206.317	422.399
ENSMUSG00000021771.14	Vdac2	cKO_vs_wt	0.0190466	0.883344	-0.0445404	0.999978	-0.0672273	0.99997	208.363	221.325	210.843	216.629
ENSMUSG00000024826.15	Dpf2	cKO_vs_wt	-0.0786291	0.315979	-0.0608012	0.999978	0.013618	0.99997	207.966	258.386	196.616	250.757
ENSMUSG00000027933.11	Ints3	cKO_vs_wt	-0.0218566	0.871881	-0.0567908	0.999978	-0.0386838	0.99997	208.065	192.586	204.642	187.21
ENSMUSG00000014402.15	Tsg101	cKO_vs_wt	0.0226047	0.873642	-0.103738	0.999978	-0.13031	0.991338	207.607	99.2982	210.673	93.4738
ENSMUSG00000039148.5	Sart1	cKO_vs_wt	0.0203954	0.913602	-0.178052	0.999978	-0.20309	0.794163	207.59	289.858	210.027	259.553
ENSMUSG00000032293.8	Ireb2	cKO_vs_wt	-0.053332	0.676426	0.00743313	0.999978	0.0570725	0.99997	207.309	174.222	199.457	176.691
ENSMUSG00000015932.8	Dstn	cKO_vs_wt	-0.0615515	0.423017	0.0126261	0.999978	0.0705973	0.99997	207.526	487.78	198.597	497.058
ENSMUSG00000017778.14	Cox7c	cKO_vs_wt	-0.086943	0.588796	0.0243275	0.999978	0.0933787	0.99997	193.88	1.06656	182.242	1.10541
ENSMUSG00000026701.15	Prdx6	cKO_vs_wt	-0.00101463	0.995701	0.171001	0.999978	0.168564	0.896605	206.789	223.334	206.273	254.658
ENSMUSG00000000441.17	Raf1	cKO_vs_wt	-0.0481959	0.605413	0.0773366	0.999978	0.11973	0.961421	206.727	89.043	199.63	95.1208
ENSMUSG00000028180.18	Zranb2	cKO_vs_wt	-0.055371	0.629331	-0.0105823	0.999978	0.040784	0.99997	206.669	248.298	198.433	249.076
ENSMUSG00000022995.16	Enah	cKO_vs_wt	0.0559168	0.614401	-0.0571794	0.999978	-0.116437	0.941628	205.962	193.165	213.778	187.752
ENSMUSG00000040667.11	Nup88	cKO_vs_wt	-0.025936	0.882364	-0.0939843	0.999978	-0.0721458	0.99997	206.122	212.066	201.994	200.72
ENSMUSG00000008373.16	Prpf31	cKO_vs_wt	-0.0682809	0.457169	-0.043475	0.999978	0.0203504	0.99997	205.62	254.241	195.801	249.377
ENSMUSG00000040407.18	Akap9	cKO_vs_wt	0.0671337	0.886261	0.00520571	0.999978	-0.0681989	0.99997	205.605	102.285	215.047	103.764
ENSMUSG00000008450.8	Nutf2	cKO_vs_wt	-0.115738	0.234376	-0.20965	0.999978	-0.222133	0.99997	168.726	0.119113	155.452	0.117744
ENSMUSG00000039361.11	Picalm	cKO_vs_wt	0.050218	0.66066	0.0387731	0.999978	-0.015107	0.99997	205.185	220.507	212.191	228.659
ENSMUSG00000021901.10	Bap1	cKO_vs_wt	-0.0284936	0.823305	-0.0968343	0.999978	-0.0737831	0.99997	205.264	82.3403	200.972	77.991
ENSMUSG00000024050.17	Wiz	cKO_vs_wt	0.0932872	0.182301	-0.00203335	0.999978	-0.100396	0.99997	204.557	107.158	217.882	108.505
ENSMUSG00000022106.14	Rcbtb2	cKO_vs_wt	0.0615089	0.412914	-0.00474542	0.999978	-0.0697712	0.99997	202.822	266.347	211.445	268.117
ENSMUSG00000031865.16	Dctn1	cKO_vs_wt	0.0640557	0.546412	-0.0666508	0.999978	-0.134857	0.896605	204.674	256.703	213.65	248.278
ENSMUSG00000063882.12	Uqcrh	cKO_vs_wt	-0.0489929	0.788623	0.0958899	0.999978	0.141158	0.99997	204.049	360.632	196.844	390.884
ENSMUSG00000006299.13	Aamp	cKO_vs_wt	-0.0344533	0.756368	0.0692521	0.999978	0.100447	0.99997	204.047	412.911	198.867	438.947
ENSMUSG00000020456.17	Ogdh	cKO_vs_wt	-0.0853542	0.194638	-0.0478239	0.999978	0.0337845	0.99997	203.741	213.609	191.845	209.058
ENSMUSG00000040565.8	Btaf1	cKO_vs_wt	-0.165471	0.115879	-0.280623	0.999978	-0.11863	0.99997	204	221.888	181.468	184.505
ENSMUSG00000006673.14	Qrich1	cKO_vs_wt	-0.0171072	0.902272	0.0287432	0.999978	0.0421544	0.99997	203.492	230.959	200.859	238.38
ENSMUSG00000022702.16	Hira	cKO_vs_wt	-0.0216304	0.886863	0.0818745	0.999978	0.0973156	0.99997	203.515	63.0973	200.285	67.7819
ENSMUSG00000018965.11	Ywhah	cKO_vs_wt	0.0782413	0.240182	-0.00635716	0.999978	-0.087421	0.99997	192.628	247.815	203.06	250.267
ENSMUSG00000063904.4	Dpp3	cKO_vs_wt	-0.00687162	0.963705	-0.0872723	0.999978	-0.0849269	0.99997	202.761	266.859	201.444	254.527
ENSMUSG00000037286.15	Stag1	cKO_vs_wt	0.0643351	0.527826	-0.0172582	0.999978	-0.085835	0.99997	203.233	182.576	212.245	182.19
ENSMUSG00000029478.16	Ncor2	cKO_vs_wt	0.152882	0.223173	-0.0543685	0.999978	-0.211698	0.808877	202.998	94.5206	225.383	92.1737
ENSMUSG00000074994.5	Qser1	cKO_vs_wt	0.0457307	0.7471	0.0240376	0.999978	-0.0261213	0.99997	202.904	74.526	209.217	76.7488
ENSMUSG00000051391.9	Ywhag	cKO_vs_wt	-0.0522255	0.700288	0.075919	0.999978	0.123977	0.948314	201.888	774.817	194.294	827.717
ENSMUSG00000004264.17	Phb2	cKO_vs_wt	0.0346865	0.813195	-0.0279555	0.999978	-0.0660882	0.99997	202.341	336.585	206.847	334.914
ENSMUSG00000003810.12	Mast2	cKO_vs_wt	-0.00425435	0.982958	0.0933418	0.999978	0.0931678	0.99997	202.399	37.6639	201.706	40.6431
ENSMUSG00000029223.12	Uchl1	cKO_vs_wt	0.168339	0.0149783	0.0864689	0.999978	-0.0862077	0.99997	202.407	661.23	227.006	710.899
ENSMUSG00000074884.12	Serf2	cKO_vs_wt	-0.115006	0.436675	-0.233058	0.999978	-0.133315	0.99997	179.164	2.34638	165.151	2.05099
ENSMUSG00000020457.13	Drg1	cKO_vs_wt	0.0316276	0.774126	0.00850378	0.999978	-0.0271168	0.99997	202.044	308.76	206.169	313.955
ENSMUSG00000028788.14	Ptp4a2	cKO_vs_wt	-0.0464825	0.638328	0.00728971	0.999978	0.0507781	0.99997	201.23	19.4753	194.527	19.7115
ENSMUSG00000026842.16	Abl1	cKO_vs_wt	-0.0305776	0.785079	-0.0526645	0.999978	-0.0247594	0.99997	201.157	126.154	196.702	122.763
ENSMUSG00000041846.15	Ppp4r3a	cKO_vs_wt	0.0397373	0.756002	-0.0958759	0.999978	-0.140244	0.99997	201.019	193.661	206.269	183.047
ENSMUSG00000041408.18	Wapl	cKO_vs_wt	0.0108089	0.950186	-0.01788	0.999978	-0.0324834	0.99997	201.086	139.877	202.379	139.214
ENSMUSG00000032185.15	Carm1	cKO_vs_wt	-0.0835028	0.269218	-0.00228026	0.999978	0.0776517	0.99997	201.01	216.297	189.508	219.131
ENSMUSG00000030120.14	Mlf2	cKO_vs_wt	0.00994482	0.95103	0.0554043	0.999978	0.0439162	0.99997	200.476	341.747	201.678	360.331
ENSMUSG00000026965.12	Anapc2	cKO_vs_wt	-0.0313832	0.785178	-0.0728227	0.999978	-0.0449112	0.99997	200.279	415.877	195.643	400.445
ENSMUSG00000022752.9	Tomm70a	cKO_vs_wt	0.105132	0.243876	-0.0660586	0.999978	-0.175209	0.82668	200.546	241.507	215.398	233.162
ENSMUSG00000024048.15	Myl12a	cKO_vs_wt	-0.106137	0.428143	-0.0593248	0.999978	0.0415136	0.99997	178.641	208.418	165.564	202.718
ENSMUSG00000028309.14	Rnf20	cKO_vs_wt	0.0289165	0.802159	-0.0377375	0.999978	-0.0713183	0.99997	199.982	228.425	203.588	225.087
ENSMUSG00000027804.13	Ppid	cKO_vs_wt	0.0153499	0.941511	-0.112805	0.999978	-0.130168	0.99997	199.879	100.656	201.669	93.8843
ENSMUSG00000054309.9	Cpsf3	cKO_vs_wt	-0.00234072	0.987094	-0.0183037	0.999978	-0.0190716	0.99997	199.73	280.718	199.044	280.929
ENSMUSG00000067194.6	Eif1ax	cKO_vs_wt	0.255377	7.40997e-06	-0.0916345	0.999978	-0.35208	0.204104	199.63	464.542	237.655	440.315
ENSMUSG00000031660.13	Brd7	cKO_vs_wt	0.0522366	0.487298	0.0862713	0.999978	0.0289836	0.99997	199.739	156.539	206.812	168.404
ENSMUSG00000021996.16	Esd	cKO_vs_wt	-0.0101022	0.9473	-0.109721	0.999978	-0.105477	0.99997	199.013	128.34	197.322	120.208
ENSMUSG00000001017.15	Chtop	cKO_vs_wt	0.0754997	0.424774	-0.0120974	0.999978	-0.0911193	0.99997	199.429	130.875	209.775	131.183
ENSMUSG00000034101.14	Ctnnd1	cKO_vs_wt	-0.0243496	0.875054	-0.035291	0.999978	-0.0146724	0.99997	199.242	314.71	195.718	310.548
ENSMUSG00000026021.15	Sumo1	cKO_vs_wt	-0.0178543	0.915824	-0.0609652	0.999978	-0.0465964	0.99997	193.867	67.156	191.156	64.7992
ENSMUSG00000101645.1	Gm28635	cKO_vs_wt	-0.0239572	0.876771	-0.0352566	0.999978	-0.0150266	0.99997	199.063	314.657	195.596	310.502
ENSMUSG00000042606.9	Hirip3	cKO_vs_wt	-0.0326076	0.778293	-0.13695	0.999978	-0.107562	0.99997	199.093	160.228	194.397	147.749
ENSMUSG00000027423.15	Snx5	cKO_vs_wt	0.173727	0.000306861	0.0872201	0.999978	-0.0905354	0.99997	198.797	277.009	223.826	297.427
ENSMUSG00000052488.7	Cherp	cKO_vs_wt	0.0335611	0.813185	-0.0407211	0.999978	-0.0777307	0.99997	198.361	171.464	202.578	169.155
ENSMUSG00000030753.15	Thap12	cKO_vs_wt	0.0332381	0.854095	-0.0308197	0.999978	-0.0677986	0.99997	198.572	44.7004	203.013	44.1464
ENSMUSG00000016933.17	Plcg1	cKO_vs_wt	-0.00202494	0.988125	0.0294213	0.999978	0.0276172	0.99997	198.308	168.524	197.812	174.052
ENSMUSG00000042506.15	Usp22	cKO_vs_wt	-0.037866	0.747559	0.0277606	0.999978	0.0612911	0.99997	197.954	397.722	192.541	410.7
ENSMUSG00000021288.18	Klc1	cKO_vs_wt	0.0292932	0.834938	-0.0152689	0.999978	-0.0490743	0.99997	197.859	280.732	201.725	281.018
ENSMUSG00000028282.12	Casp8ap2	cKO_vs_wt	-0.0151344	0.924452	0.0119657	0.999978	0.0243422	0.99997	197.8	78.6326	195.413	79.8894
ENSMUSG00000042712.10	Tceal9	cKO_vs_wt	-0.0337567	0.767778	-0.0412513	0.999978	-0.0126757	0.99997	196.968	243.859	192.031	239.553
ENSMUSG00000027168.21	Pax6	cKO_vs_wt	-0.00100177	0.996676	-0.114544	0.999978	-0.117719	0.99997	197.29	137.123	196.757	128.277
ENSMUSG00000005442.13	Cic	cKO_vs_wt	0.0695048	0.591183	0.0109112	0.999978	-0.0631427	0.99997	197.523	58.9415	206.989	60.204
ENSMUSG00000027349.5	Fam98b	cKO_vs_wt	0.020252	0.902894	-0.0382622	0.999978	-0.0625319	0.99997	197.49	194.531	199.829	191.601
ENSMUSG00000040028.10	Elavl1	cKO_vs_wt	-0.0294901	0.813195	0.00200593	0.999978	0.0275114	0.99997	196.138	491.968	191.775	499.162
ENSMUSG00000026276.20	2022-09-02	cKO_vs_wt	-0.0617807	0.595646	-0.0264298	0.999978	0.0313801	0.99997	195.886	421.924	187.336	418.035
ENSMUSG00000067873.11	Htatsf1	cKO_vs_wt	0.0461343	0.713254	-0.120466	0.999978	-0.170277	0.948314	196.83	163.611	202.852	151.761
ENSMUSG00000116048.1	2022-09-02	cKO_vs_wt	-0.0618449	0.594337	-0.0275433	0.999978	0.0303407	0.99997	195.623	420.911	187.076	416.683
ENSMUSG00000028577.13	Plaa	cKO_vs_wt	0.10285	0.131009	0.00859231	0.999978	-0.0975564	0.99997	196.092	184.878	210.253	187.682
ENSMUSG00000021374.10	Nup153	cKO_vs_wt	0.0027394	0.987124	0.0936055	0.999978	0.0877387	0.99997	196.387	100.414	196.434	108.068
ENSMUSG00000018848.4	Rars	cKO_vs_wt	-0.0647845	0.573887	-0.0591859	0.999978	0.00166359	0.99997	196.226	267.95	187.236	260.337
ENSMUSG00000041645.14	Ddx24	cKO_vs_wt	-0.0372177	0.777516	-0.140849	0.999978	-0.10732	0.99997	193.608	169.744	188.383	155.76
ENSMUSG00000034906.15	Ncaph	cKO_vs_wt	-0.0613876	0.559831	-0.0409592	0.999978	0.0166473	0.99997	195.691	235.208	187.186	231.322
ENSMUSG00000063450.14	Syne2	cKO_vs_wt	0.0352538	0.93669	-0.043723	0.999978	-0.0830741	0.99997	195.911	158.203	200.248	155.305
ENSMUSG00000030697.7	Ppp4c	cKO_vs_wt	0.125575	0.0192467	0.0350901	0.999978	-0.0943648	0.99997	195.559	265.495	213.067	275.442
ENSMUSG00000010205.11	Raver1	cKO_vs_wt	0.289414	0.000942305	0.095309	0.999978	-0.199583	0.826569	195.255	238.22	238.1	258.147
ENSMUSG00000111497.1	Gm38431	cKO_vs_wt	0.289414	0.000942305	0.095309	0.999978	-0.199583	0.826569	195.255	238.22	238.1	258.147
ENSMUSG00000020859.16	Spag9	cKO_vs_wt	-0.0992707	0.274115	0.0486888	0.999978	0.142287	0.874918	195.39	95.3814	182.188	99.9137
ENSMUSG00000031314.18	Taf1	cKO_vs_wt	-0.025748	0.883047	-0.142473	0.999978	-0.120975	0.99997	195.586	148.551	191.813	135.871
ENSMUSG00000013593.12	Ndufs2	cKO_vs_wt	0.0608206	0.561651	-0.0296719	0.999978	-0.094891	0.99997	195.249	284.578	203.267	281.423
ENSMUSG00000005506.16	Celf1	cKO_vs_wt	-0.0498731	0.622399	-0.00656137	0.999978	0.0387746	0.99997	193.757	346.12	186.91	348.957
ENSMUSG00000022884.15	Eif4a2	cKO_vs_wt	0.0706239	0.504024	-0.0267155	0.999978	-0.101368	0.99997	194.316	89.8251	203.79	89.1072
ENSMUSG00000050244.9	Heatr1	cKO_vs_wt	-0.0283002	0.823974	-0.0205966	0.999978	0.00386607	0.99997	194.486	175.492	190.423	174.838
ENSMUSG00000034673.14	Pbx2	cKO_vs_wt	0.000236529	0.99861	-0.0111177	0.999978	-0.0150534	0.99997	194.667	141.932	194.446	143.187
ENSMUSG00000116933.1	Atp5o	cKO_vs_wt	0.0122221	0.950672	0.0469621	0.999978	0.0315693	0.99997	194.585	139.125	195.874	146.065
ENSMUSG00000001424.14	Snd1	cKO_vs_wt	-0.0446049	0.66129	-0.0923756	0.999978	-0.0510848	0.99997	194.169	274.298	187.987	260.277
ENSMUSG00000063856.7	Gpx1	cKO_vs_wt	0.381876	2.78819e-06	0.101682	0.999978	-0.283922	0.654691	193.827	222.899	251.859	243.13
ENSMUSG00000063888.7	Rpl7l1	cKO_vs_wt	-0.0839641	0.256842	-0.0509504	0.999978	0.0282775	0.99997	192.131	79.6647	180.951	77.8875
ENSMUSG00000024507.6	Hsd17b4	cKO_vs_wt	0.0160329	0.926596	-0.0895543	0.999978	-0.110161	0.99997	193.377	390.524	195.086	371.005
ENSMUSG00000022100.14	Xpo7	cKO_vs_wt	-0.0779562	0.26368	0.140181	0.999978	0.214238	0.621628	193.052	182.684	182.72	204.185
ENSMUSG00000030213.12	Atf7ip	cKO_vs_wt	-0.0160662	0.937694	0.0473116	0.999978	0.0589595	0.99997	192.969	223.032	190.635	234.131
ENSMUSG00000032745.18	Gpbp1	cKO_vs_wt	0.040538	0.807542	-0.133133	0.999978	-0.177851	0.942844	192.825	60.3975	197.936	55.4503
ENSMUSG00000032580.12	Rbm5	cKO_vs_wt	-0.0496185	0.586121	-0.0511229	0.999978	-0.00391539	0.99997	192.629	152.978	185.823	149.417
ENSMUSG00000035851.14	Ythdc1	cKO_vs_wt	0.0321533	0.78832	-0.127395	0.999978	-0.162575	0.919955	192.256	234.78	196.29	217.441
ENSMUSG00000015880.13	Ncapg	cKO_vs_wt	0.048229	0.731556	-0.106063	0.999978	-0.158375	0.99997	192.044	265.253	198.097	248.841
ENSMUSG00000069744.7	Psmb3	cKO_vs_wt	-0.0212691	0.910604	0.0171122	0.999978	0.0324448	0.99997	191.936	106.181	188.789	108.797
ENSMUSG00000001383.9	Zmat2	cKO_vs_wt	-0.0182677	0.921808	-0.057207	0.999978	-0.043417	0.99997	191.921	329.218	189.039	319.539
ENSMUSG00000040524.9	Zfp609	cKO_vs_wt	-0.0732023	0.532676	-0.0220978	0.999978	0.0466554	0.99997	191.556	73.9962	181.842	73.6205
ENSMUSG00000029422.15	Rsrc2	cKO_vs_wt	-0.0380248	0.807542	-0.0447863	0.999978	-0.0114248	0.99997	190.891	161.136	185.534	158.048
ENSMUSG00000022000.11	Zc3h13	cKO_vs_wt	-0.0373018	0.829329	-0.220119	0.999978	-0.18622	0.961581	190.951	162.103	185.647	140.978
ENSMUSG00000041720.14	Pi4ka	cKO_vs_wt	-0.0433112	0.747559	-0.104656	0.999978	-0.066168	0.99997	190.209	143.57	184.319	135.293
ENSMUSG00000070372.11	Capza1	cKO_vs_wt	-0.0310361	0.813784	0.289374	0.999978	0.319247	0.99997	185.823	1.28426	181.517	1.59924
ENSMUSG00000027109.16	Sp3	cKO_vs_wt	0.0203106	0.908457	0.0305846	0.999978	0.00433434	0.99997	190.368	143.177	192.817	148.032
ENSMUSG00000005871.15	Apc	cKO_vs_wt	0.000186769	0.999436	-0.0246196	0.999978	-0.0304432	0.99997	190.332	58.7019	190.156	58.2629
ENSMUSG00000089739.2	Gm20431	cKO_vs_wt	-0.0906768	0.328858	-0.0509723	0.999978	0.0275113	0.99997	148.565	24.8637	139.223	24.5028
ENSMUSG00000028911.16	Srsf4	cKO_vs_wt	0.0811839	0.4583	-0.0485881	0.999978	-0.134069	0.969671	190.376	246.666	200.992	241.668
ENSMUSG00000026933.17	Camsap1	cKO_vs_wt	0.0119355	0.945766	-0.105573	0.999978	-0.120227	0.99997	190.116	53.4931	191.449	50.0894
ENSMUSG00000025007.13	Aldh18a1	cKO_vs_wt	0.0426771	0.677738	0.0270078	0.999978	-0.019182	0.99997	189.636	273.236	194.995	281.927
ENSMUSG00000039967.14	Zfp292	cKO_vs_wt	-0.0343255	0.882364	-0.0489336	0.999978	-0.0197835	0.99997	189.904	109.699	185.019	107.24
ENSMUSG00000028873.16	Cdca8	cKO_vs_wt	0.138467	0.0555496	-0.114142	0.999978	-0.257613	0.0750421	189.669	253.858	208.369	237.663
ENSMUSG00000022433.19	Csnk1e	cKO_vs_wt	0.0839106	0.276218	-0.025175	0.999978	-0.113928	0.99997	189.149	130.367	200.273	129.939
ENSMUSG00000039108.14	Lsm14b	cKO_vs_wt	0.000140987	0.999395	-0.0576139	0.999978	-0.0605944	0.99997	188.726	147.792	188.67	143.918
ENSMUSG00000033952.14	Aspm	cKO_vs_wt	-0.0487909	0.75878	-0.0795942	0.999978	-0.0355024	0.99997	188.805	134.83	182.179	128.863
ENSMUSG00000034311.3	Kif4	cKO_vs_wt	-0.0345952	0.780278	-0.1383	0.999978	-0.107566	0.99997	188.438	202.223	183.59	185.809
ENSMUSG00000038406.17	Scaf1	cKO_vs_wt	0.17177	0.0733937	-0.0726478	0.999978	-0.249922	0.330465	188.32	108.467	211.779	104.728
ENSMUSG00000042489.15	Clspn	cKO_vs_wt	-0.101988	0.323877	-0.187236	0.999978	-0.0883547	0.99997	186.946	152.907	173.936	135.76
ENSMUSG00000052296.7	Ppp6r1	cKO_vs_wt	-0.0581879	0.495003	-0.0235904	0.999978	0.029448	0.99997	187.198	102.933	179.67	102.379
ENSMUSG00000025451.15	Paip1	cKO_vs_wt	0.0589329	0.654932	-0.0349011	0.999978	-0.0986548	0.99997	186.166	222.568	193.662	219.744
ENSMUSG00000013698.12	Pea15a	cKO_vs_wt	0.105732	0.234194	0.144519	0.999978	0.0346676	0.99997	187.018	323.151	200.984	362.55
ENSMUSG00000035478.14	Mbd3	cKO_vs_wt	-0.0175317	0.9087	-0.0424913	0.999978	-0.0280943	0.99997	186.585	283.564	184.06	279.142
ENSMUSG00000026193.15	Fn1	cKO_vs_wt	-0.176664	0.688989	-0.0711014	0.999978	0.102449	0.99997	186.316	105.96	164.399	102.052
ENSMUSG00000029227.15	Fip1l1	cKO_vs_wt	0.137393	0.00521811	-0.109316	0.999978	-0.251049	0.0824028	185.613	206.956	203.708	194.355
ENSMUSG00000005371.15	Fbxo11	cKO_vs_wt	0.0475456	0.640912	-0.0738526	0.999978	-0.12582	0.983515	185.979	135.667	191.907	130.201
ENSMUSG00000008333.12	Snrpb2	cKO_vs_wt	0.000775648	0.996821	-0.0958393	0.999978	-0.101163	0.99997	185.741	177.611	185.432	167.961
ENSMUSG00000005103.12	Wdr1	cKO_vs_wt	-0.0413317	0.746593	-0.0894841	0.999978	-0.0522154	0.99997	185.795	276.881	180.311	263.25
ENSMUSG00000037461.10	Ints7	cKO_vs_wt	-0.135599	0.0281172	0.0150306	0.999978	0.146469	0.78567	185.754	168.52	168.878	172.2
ENSMUSG00000006676.16	Usp19	cKO_vs_wt	0.104418	0.135577	-0.0640856	0.999978	-0.171689	0.723312	185.477	205.483	199.189	198.891
ENSMUSG00000030754.9	Copb1	cKO_vs_wt	0.0107989	0.949371	-0.00368593	0.999978	-0.018296	0.99997	185.672	281.009	186.785	283.476
ENSMUSG00000002496.10	Tsc2	cKO_vs_wt	-0.0412207	0.751217	-0.0251256	0.999978	0.0114583	0.99997	185.297	118.579	179.862	118.104
ENSMUSG00000030663.12	1110004F10Rik	cKO_vs_wt	-0.0423652	0.747559	-0.100518	0.999978	-0.060069	0.99997	182.314	132.95	176.858	125.412
ENSMUSG00000029014.14	Dnajc2	cKO_vs_wt	0.0610134	0.575269	-0.0069074	0.999978	-0.0729758	0.99997	185.182	111.4	192.805	112.436
ENSMUSG00000024583.3	Txnl1	cKO_vs_wt	0.201836	0.000134113	-0.0980181	0.999978	-0.303268	0.0366226	185.294	338.732	212.747	319.781
ENSMUSG00000005312.15	Ubqln1	cKO_vs_wt	-0.0557463	0.581293	0.0715642	0.999978	0.122918	0.99997	184.613	274.146	177.445	292.373
ENSMUSG00000028609.6	Magoh	cKO_vs_wt	0.039274	0.839392	-0.0799074	0.999978	-0.124186	0.99997	184.539	245.852	189.293	234.923
ENSMUSG00000021537.9	Cetn3	cKO_vs_wt	0.00901103	0.966116	-0.0146927	0.999978	-0.0279348	0.99997	184.66	227.059	185.481	227.441
ENSMUSG00000042834.15	Nrep	cKO_vs_wt	-0.0322764	0.84575	0.0113763	0.999978	0.0405315	0.99997	184.46	148.428	180.206	151.102
ENSMUSG00000018417.14	Myo1b	cKO_vs_wt	0.0224931	0.90271	-0.0885077	0.999978	-0.115877	0.99997	184.198	227.9	186.761	216.525
ENSMUSG00000041164.15	Zmiz2	cKO_vs_wt	0.019962	0.906878	0.139021	0.999978	0.112199	0.99997	184.184	33.7716	186.467	37.7788
ENSMUSG00000024283.15	Wac	cKO_vs_wt	0.114854	0.0992146	0.00476658	0.999978	-0.112827	0.99997	183.363	33.5247	198.389	33.9229
ENSMUSG00000024400.16	Wdr33	cKO_vs_wt	-0.0973828	0.318093	-0.0565514	0.999978	0.0369486	0.99997	184.039	141.336	171.742	137.453
ENSMUSG00000078923.10	Ube2v1	cKO_vs_wt	-0.0895628	0.351115	-0.120203	0.999978	-0.0418777	0.99997	142.194	21.9842	133.351	20.6102
ENSMUSG00000035469.17	Rcbtb1	cKO_vs_wt	-0.0554776	0.622399	-0.0467393	0.999978	0.00459213	0.99997	183.405	170.983	176.299	167.109
ENSMUSG00000024081.9	Cebpz	cKO_vs_wt	0.0125307	0.945889	-0.038173	0.999978	-0.0540915	0.99997	183.293	150.88	184.547	148.436
ENSMUSG00000021737.4	Psmd6	cKO_vs_wt	0.292002	2.95196e-07	-0.0559896	0.999978	-0.352927	0.00142195	183.028	491.209	223.514	477.782
ENSMUSG00000077450.13	Rab11b	cKO_vs_wt	-0.103268	0.266241	0.0444917	0.999978	0.14448	0.99997	163.933	2.91474	152.432	3.04421
ENSMUSG00000063550.8	Nup98	cKO_vs_wt	-0.101286	0.172887	-0.0685981	0.999978	0.0296808	0.99997	183.212	215.02	170.542	207.239
ENSMUSG00000042406.8	Atf4	cKO_vs_wt	0.189279	0.00282487	0.116414	0.999978	-0.0782856	0.99997	183.468	77.5882	208.832	85.533
ENSMUSG00000040782.12	Cop1	cKO_vs_wt	0.150585	0.0415132	0.0502285	0.999978	-0.131434	0.99997	178.521	0.721103	197.935	0.774074
ENSMUSG00000031095.15	Cul4b	cKO_vs_wt	0.010727	0.960079	0.0329714	0.999978	0.0186737	0.99997	182.887	166.897	183.868	172.637
ENSMUSG00000020198.8	Ap3d1	cKO_vs_wt	-0.0304464	0.854095	0.00043983	0.999978	0.0274207	0.99997	182.714	142.695	178.618	144.114
ENSMUSG00000036241.3	Ube2r2	cKO_vs_wt	-0.0147323	0.922699	-0.101597	0.999978	-0.0911048	0.99997	182.674	201.322	180.536	189.467
ENSMUSG00000001674.11	Ddx18	cKO_vs_wt	0.0116944	0.953608	-0.042932	0.999978	-0.0571232	0.99997	177.193	22.6894	178.322	22.1836
ENSMUSG00000040025.17	Ythdf2	cKO_vs_wt	0.0996367	0.147943	-0.0111757	0.999978	-0.114631	0.99997	182.427	187.616	195.119	187.895
ENSMUSG00000030512.13	Snrpa1	cKO_vs_wt	-0.00782544	0.967462	-0.0349051	0.999978	-0.0316468	0.99997	182.234	474.364	180.865	469.257
ENSMUSG00000048170.14	Mcmbp	cKO_vs_wt	-0.00466176	0.971066	0.0262028	0.999978	0.0263282	0.99997	182.388	276.688	181.497	285.177
ENSMUSG00000041219.14	Arhgap11a	cKO_vs_wt	0.0200669	0.901473	-0.04456	0.999978	-0.0701596	0.99997	182.055	84.0441	184.391	82.3165
ENSMUSG00000025162.17	Csnk1d	cKO_vs_wt	-0.0133119	0.91469	0.0115309	0.999978	0.0200215	0.99997	182.147	251.232	180.279	256.307
ENSMUSG00000055839.6	Elob	cKO_vs_wt	-0.0459302	0.832913	0.0921642	0.999978	0.133378	0.99997	182.004	115.11	175.881	124.832
ENSMUSG00000024493.9	Lars	cKO_vs_wt	-0.0285498	0.807542	-0.0176014	0.999978	0.00694783	0.99997	181.726	211.312	177.765	210.907
ENSMUSG00000028678.13	Kif2c	cKO_vs_wt	-0.0711522	0.526695	-0.149602	0.999978	-0.0822259	0.99997	181.678	241.064	172.566	219.742
ENSMUSG00000020936.8	Nmt1	cKO_vs_wt	-0.0551362	0.626684	-0.0444972	0.999978	0.0059181	0.99997	181.711	164.323	174.587	161.534
ENSMUSG00000037458.15	Azin1	cKO_vs_wt	0.0741445	0.47673	0.00338293	0.999978	-0.0756132	0.99997	181.438	106.26	190.704	107.488
ENSMUSG00000020706.13	Ftsj3	cKO_vs_wt	0.0325217	0.789482	-0.0504985	0.999978	-0.085924	0.99997	181.467	192.06	185.3	187.505
ENSMUSG00000052144.8	Ppp4r2	cKO_vs_wt	0.0743163	0.449188	-0.0229321	0.999978	-0.102176	0.99997	177.487	35.3444	186.586	35.1379
ENSMUSG00000025203.6	Scd2	cKO_vs_wt	-0.25928	0.300542	-0.0908035	0.999978	0.166102	0.99997	180.792	163.613	150.782	155.509
ENSMUSG00000024045.6	Akap8	cKO_vs_wt	-0.0878022	0.400784	-0.0971925	0.999978	-0.0116112	0.99997	180.641	203.672	169.576	192.194
ENSMUSG00000027187.10	Cat	cKO_vs_wt	-0.0250827	0.803338	-0.120033	0.999978	-0.0981282	0.996073	180.873	308.674	177.438	287.043
ENSMUSG00000021127.7	Zfp36l1	cKO_vs_wt	0.268437	0.000887711	-0.068647	0.999978	-0.342922	0.364432	180.587	102.674	217.157	99.4843
ENSMUSG00000059474.13	Mbtd1	cKO_vs_wt	0.0152255	0.940945	0.10971	0.999978	0.0894503	0.99997	174.983	60.4964	176.588	65.9525
ENSMUSG00000026867.18	Gapvd1	cKO_vs_wt	-0.0318033	0.822392	-0.03104	0.999978	-0.00305734	0.99997	180.933	175.232	176.863	173.232
ENSMUSG00000004865.16	Srpk1	cKO_vs_wt	0.0170529	0.895429	0.118084	0.999978	0.0968116	0.99997	180.695	203.529	182.568	223.828
ENSMUSG00000005481.18	Ddx39	cKO_vs_wt	-0.0775492	0.413659	0.0172592	0.999978	0.0904362	0.99997	180.461	408.253	170.697	417.614
ENSMUSG00000038324.13	Trpc4ap	cKO_vs_wt	0.00106595	0.995318	0.0413154	0.999978	0.0366025	0.99997	180.098	253.808	179.986	264.695
ENSMUSG00000022052.9	Ppp2r2a	cKO_vs_wt	0.0614697	0.619336	0.0743745	0.999978	0.00912842	0.99997	179.649	134.303	187.118	142.504
ENSMUSG00000028796.17	Phc2	cKO_vs_wt	-0.00467745	0.977555	0.00393931	0.999978	0.00421857	0.99997	179.857	157.968	179.031	160.702
ENSMUSG00000025228.5	Actr1a	cKO_vs_wt	-0.0960917	0.220763	-0.00769492	0.999978	0.0844926	0.99997	179.95	289.917	168.088	292.148
ENSMUSG00000021048.7	Mthfd1	cKO_vs_wt	-0.0435871	0.732511	-0.0847399	0.999978	-0.0441806	0.99997	179.415	259.795	173.724	247.607
ENSMUSG00000021149.8	Gtpbp4	cKO_vs_wt	0.0610178	0.626468	-0.0523295	0.999978	-0.117567	0.99997	179.01	222.46	186.377	216.658
ENSMUSG00000035297.14	Cops4	cKO_vs_wt	-0.0356099	0.792234	0.0436345	0.999978	0.0750417	0.99997	178.903	261.6	174.239	272.582
ENSMUSG00000053477.17	Tcf4	cKO_vs_wt	-0.00108234	0.996707	0.130218	0.999978	0.128088	0.99997	177.731	174.275	177.216	192.963
ENSMUSG00000029394.11	Cdk2ap1	cKO_vs_wt	0.0139423	0.945766	-2.06517	0.999978	-2.07386	0.595926	102.323	0.309405	103.095	0.0732651
ENSMUSG00000044221.14	Grsf1	cKO_vs_wt	0.0700196	0.437412	0.0235614	0.999978	-0.0506763	0.99997	178.573	230.986	187.089	237.765
ENSMUSG00000022350.7	Washc5	cKO_vs_wt	0.0223318	0.881355	0.0652606	0.999978	0.0367946	0.99997	178.485	84.3114	181.099	89.5779
ENSMUSG00000028837.8	Psmb2	cKO_vs_wt	-0.0179918	0.919931	-0.0125826	0.999978	0.00211505	0.99997	177.922	409.806	175.36	410.973
ENSMUSG00000026864.13	Hspa5	cKO_vs_wt	-0.157933	0.78832	-0.123768	0.999978	0.032251	0.99997	178.477	240.282	159.546	222.673
ENSMUSG00000005609.16	Ctr9	cKO_vs_wt	-0.0227377	0.88616	-0.149217	0.999978	-0.129302	0.99997	178.353	159.285	175.283	145.266
ENSMUSG00000026192.13	Atic	cKO_vs_wt	0.00177973	0.992401	-0.110615	0.999978	-0.116035	0.934876	178.397	308.142	178.298	288.615
ENSMUSG00000026662.13	Sephs1	cKO_vs_wt	-0.0519349	0.548292	-0.0026981	0.999978	0.045391	0.99997	177.693	182.759	171.139	184.512
ENSMUSG00000015733.13	Capza2	cKO_vs_wt	-0.0747791	0.463241	-0.00503656	0.999978	0.0655791	0.99997	177.904	296.541	168.638	298.557
ENSMUSG00000027893.14	Ahcyl1	cKO_vs_wt	-0.0116333	0.942206	0.0350437	0.999978	0.0424339	0.99997	178.045	218.488	176.472	226.487
ENSMUSG00000019849.11	Prep	cKO_vs_wt	-0.00939122	0.960037	-0.0760248	0.999978	-0.0708952	0.99997	178.064	276.114	176.63	265.01
ENSMUSG00000033813.15	Tcea1	cKO_vs_wt	0.0936656	0.238661	0.0671983	0.999978	-0.0308191	0.99997	175.477	21.1204	186.926	22.2751
ENSMUSG00000034593.16	Myo5a	cKO_vs_wt	0.0353096	0.86799	-0.0130787	0.999978	-0.0531509	0.99997	177.535	163.128	181.708	163.32
ENSMUSG00000021963.17	Sap18	cKO_vs_wt	-0.0323782	0.882767	-0.185911	0.999978	-0.146351	0.99997	153.289	1.27216	149.519	1.1093
ENSMUSG00000025745.12	Hadha	cKO_vs_wt	-0.0581582	0.595597	-0.0448372	0.999978	0.0093288	0.99997	177.863	250.879	170.498	245.974
ENSMUSG00000026924.17	Sec16a	cKO_vs_wt	-0.0652355	0.629477	-0.00873673	0.999978	0.0510798	0.99997	177.698	102.958	169.723	103.897
ENSMUSG00000015291.10	Gdi1	cKO_vs_wt	-0.00734855	0.970653	0.0506673	0.999978	0.0539024	0.99997	177.72	233.92	176.693	244.764
ENSMUSG00000036323.14	Srp72	cKO_vs_wt	-0.0617747	0.429129	-0.0517833	0.999978	0.0064558	0.99997	177.757	145.932	169.982	142.178
ENSMUSG00000041126.16	H2afv	cKO_vs_wt	-0.0417952	0.831159	0.024528	0.999978	0.0628086	0.99997	177.731	347.489	172.353	358.586
ENSMUSG00000054808.15	Actn4	cKO_vs_wt	0.00588933	0.973528	-0.0123978	0.999978	-0.0219528	0.99997	177.115	245.399	177.56	246.961
ENSMUSG00000021767.18	Kat6b	cKO_vs_wt	0.0510257	0.838851	-0.0722963	0.999978	-0.12667	0.99997	177.284	63.5623	183.23	61.2402
ENSMUSG00000022031.6	Elp3	cKO_vs_wt	0.0374798	0.712267	-0.0824333	0.999978	-0.123248	0.99997	176.722	282.716	181.04	270.003
ENSMUSG00000038518.15	Jarid2	cKO_vs_wt	-0.143692	0.195754	-0.191101	0.999978	-0.0518076	0.99997	177.145	99.7643	160.24	88.4572
ENSMUSG00000042541.10	Sem1	cKO_vs_wt	-0.105089	0.428912	-0.0352559	0.999978	0.0661776	0.99997	177.228	691.209	164.479	682.519
ENSMUSG00000023106.15	Denr	cKO_vs_wt	0.0589998	0.541567	0.0323713	0.999978	-0.0311745	0.99997	176.858	128.814	183.93	132.942
ENSMUSG00000029920.9	Smarcad1	cKO_vs_wt	0.01415	0.942233	0.04916	0.999978	0.0315588	0.99997	176.766	188.266	178.237	196.973
ENSMUSG00000038717.8	Atp5l	cKO_vs_wt	-0.0705859	0.695275	-0.56476	0.999978	-0.452009	0.99997	153.155	0.525395	145.587	0.335301
ENSMUSG00000032366.15	Tpm1	cKO_vs_wt	-0.165655	0.548292	-0.192482	0.999978	-0.02978	0.99997	176.054	520.842	156.827	461.778
ENSMUSG00000020430.12	Pes1	cKO_vs_wt	-0.0767929	0.460007	0.026065	0.999978	0.0997419	0.99997	176.735	169.304	167.249	174.052
ENSMUSG00000022360.8	Atad2	cKO_vs_wt	0.0604811	0.58612	0.00811609	0.999978	-0.0571502	0.99997	176.712	228.752	183.956	232.328
ENSMUSG00000039844.19	Rapgef1	cKO_vs_wt	0.00895943	0.963251	-0.0657559	0.999978	-0.0809191	0.99997	176.482	49.0894	177.42	47.6218
ENSMUSG00000004268.11	Emg1	cKO_vs_wt	-0.0620975	0.626678	0.128252	0.999978	0.18727	0.92838	175.674	179.215	168.002	198.958
ENSMUSG00000014313.15	Cox6c	cKO_vs_wt	-0.116453	0.346294	0.319183	0.999978	0.426832	0.241077	176.208	25.7825	162.209	32.6209
ENSMUSG00000024387.13	Csnk2b	cKO_vs_wt	-0.0732897	0.541168	0.0647966	0.999978	0.134046	0.99997	174.898	493.271	165.878	520.58
ENSMUSG00000079477.9	Rab7	cKO_vs_wt	0.00059789	0.996676	0.115862	0.999978	0.112242	0.99997	172.422	97.3098	172.328	106.453
ENSMUSG00000040738.10	Ints8	cKO_vs_wt	0.0344541	0.807542	0.0693486	0.999978	0.0306083	0.99997	175.673	176.455	179.639	186.967
ENSMUSG00000067786.16	Nnat	cKO_vs_wt	0.379464	0.0143447	0.292003	0.999978	-0.0906195	0.99997	175.87	537.006	228.497	666.126
ENSMUSG00000032253.13	Phip	cKO_vs_wt	0.0197046	0.935994	-0.0541331	0.999978	-0.0790513	0.99997	175.775	153.621	177.872	149.356
ENSMUSG00000017548.15	Suz12	cKO_vs_wt	0.0803542	0.577666	0.0525254	0.999978	-0.033218	0.99997	175.712	142.984	185.518	149.982
ENSMUSG00000048327.6	Ckap2l	cKO_vs_wt	0.00891604	0.960864	-0.0700799	0.999978	-0.08306	0.99997	175.56	104.648	176.337	100.663
ENSMUSG00000054199.17	Gon4l	cKO_vs_wt	-0.0486029	0.767435	-0.0520619	0.999978	-0.010579	0.99997	120.584	31.813	116.545	31.2573
ENSMUSG00000038914.15	Dido1	cKO_vs_wt	-0.0970699	0.539984	-0.0730455	0.999978	0.0195579	0.99997	175.405	88.3466	163.857	85.0393
ENSMUSG00000118124.1	AC129217.1	cKO_vs_wt	0.0730373	0.225701	-0.158024	0.999978	-0.237528	0.318208	175.324	73.1083	184.109	66.3898
ENSMUSG00000089824.10	Rbm12	cKO_vs_wt	0.0712499	0.472092	0.0629773	0.999978	-0.0109776	0.99997	175.09	154.068	183.682	162.568
ENSMUSG00000029649.10	Pomp	cKO_vs_wt	-0.0149169	0.939424	-0.0847541	0.999978	-0.0738923	0.99997	175.269	278.132	173.154	265.684
ENSMUSG00000030591.17	Psmd8	cKO_vs_wt	0.226329	6.77011e-06	0.0606974	0.999978	-0.169471	0.567531	174.296	459.426	203.602	485.148
ENSMUSG00000025665.16	Rps6ka6	cKO_vs_wt	0.0708802	0.57649	0.0416931	0.999978	-0.0335515	0.99997	174.989	176.308	183.567	183.487
ENSMUSG00000032397.7	Tipin	cKO_vs_wt	-0.041468	0.74813	-0.012512	0.999978	0.0251985	0.99997	174.904	173.362	169.659	173.533
ENSMUSG00000030447.15	Cyfip1	cKO_vs_wt	-0.0555511	0.469007	-0.0024735	0.999978	0.0486514	0.99997	174.619	250	167.661	252.614
ENSMUSG00000026385.16	Dbi	cKO_vs_wt	-0.00369166	0.987124	0.121873	0.999978	0.121103	0.99997	174.426	435.238	173.776	478.666
ENSMUSG00000041763.14	Tpp2	cKO_vs_wt	0.00984591	0.960037	-0.079592	0.999978	-0.0930377	0.99997	174.217	228.057	175.142	218.099
ENSMUSG00000032480.17	Dhx30	cKO_vs_wt	-0.0158905	0.917014	-0.0515695	0.999978	-0.0397418	0.99997	173.892	115.834	171.759	112.963
ENSMUSG00000004642.13	Slbp	cKO_vs_wt	0.138706	0.0234978	-0.0792862	0.999978	-0.223691	0.228146	173.916	333.443	190.97	319.222
ENSMUSG00000031985.9	Gnpat	cKO_vs_wt	0.0579861	0.620422	-0.0256089	0.999978	-0.0888155	0.99997	173.759	62.9004	180.69	62.628
ENSMUSG00000026775.9	Yme1l1	cKO_vs_wt	-0.0439399	0.764646	0.036951	0.999978	0.0768382	0.99997	173.635	197.602	168.054	204.558
ENSMUSG00000000001.4	Gnai3	cKO_vs_wt	0.261744	6.89927e-08	-0.0121969	0.999978	-0.278884	0.0221776	173.299	330.346	207.448	331.086
ENSMUSG00000025917.9	Cops5	cKO_vs_wt	0.00200275	0.990335	-0.025917	0.999978	-0.0327361	0.99997	173.477	179.41	173.42	178.26
ENSMUSG00000057278.8	Snrpg	cKO_vs_wt	-0.125437	0.500372	0.0498598	0.999978	0.120851	0.99997	172.686	1.09515	157.977	1.17446
ENSMUSG00000038371.15	Sbf2	cKO_vs_wt	-0.0261322	0.885193	-0.066889	0.999978	-0.0463276	0.99997	173.342	67.6196	170.001	65.4301
ENSMUSG00000071533.11	Pcnp	cKO_vs_wt	-0.15169	0.014662	0.0767262	0.999978	0.220134	0.99997	145.961	17.256	131.087	18.5717
ENSMUSG00000030298.10	Sec13	cKO_vs_wt	-0.0367074	0.78832	-0.0812675	0.999978	-0.0483908	0.99997	173.078	248.184	168.423	237.672
ENSMUSG00000008958.14	Vps72	cKO_vs_wt	0.042561	0.760997	0.0109936	0.999978	-0.0363152	0.99997	172.554	160.737	177.433	164.433
ENSMUSG00000030970.16	Ctbp2	cKO_vs_wt	-0.0815955	0.333937	0.081858	0.999978	0.15954	0.912423	172.767	220.482	163.127	236.133
ENSMUSG00000073940.3	Hbb-bt	cKO_vs_wt	0.142494	0.831159	-0.294532	0.999978	-0.439511	0.99997	85.4084	28.1704	94.1452	23.5754
ENSMUSG00000047248.20	C2cd3	cKO_vs_wt	-0.0462534	0.764606	0.0472571	0.999978	0.0890758	0.99997	171.915	63.2122	166.334	65.8701
ENSMUSG00000027245.11	Hypk	cKO_vs_wt	-0.0690756	0.623983	-0.121716	0.999978	-0.0555445	0.99997	171.636	314.449	163.312	292.69
ENSMUSG00000022890.13	Atp5j	cKO_vs_wt	0.0100362	0.960037	-0.0350865	0.999978	-0.048163	0.99997	171.852	386.377	172.762	381.247
ENSMUSG00000031065.14	Cdk16	cKO_vs_wt	-0.0232	0.885964	0.233371	0.999978	0.245107	0.747062	171.919	19.057	168.973	22.8014
ENSMUSG00000023505.13	Cdca3	cKO_vs_wt	-0.0124342	0.945766	0.00228557	0.999978	0.0108052	0.99997	171.678	337.828	169.911	342.394
ENSMUSG00000078652.9	Psme3	cKO_vs_wt	0.194569	0.000155697	-0.000353869	0.999978	-0.199162	0.422657	171.544	359.134	195.927	364.029
ENSMUSG00000033487.14	Fndc3a	cKO_vs_wt	-0.0432471	0.694744	-0.065032	0.999978	-0.0279948	0.99997	171.262	83.708	166.007	81.1948
ENSMUSG00000040354.14	Mars	cKO_vs_wt	0.0414102	0.676813	0.00771031	0.999978	-0.0378247	0.99997	171.308	197.8	175.959	201.284
ENSMUSG00000020196.10	Cabin1	cKO_vs_wt	-0.0421725	0.711491	-0.0382714	0.999978	-0.00195295	0.99997	171.02	80.9375	165.907	79.7845
ENSMUSG00000000325.16	Arvcf	cKO_vs_wt	0.203668	0.00678677	0.0321902	0.999978	-0.175358	0.839721	170.982	208.721	196.493	216.715
ENSMUSG00000032604.16	Qars	cKO_vs_wt	-0.148535	0.00623288	-0.0996538	0.999978	0.0442235	0.99997	170.177	198.457	153.205	187.43
ENSMUSG00000033436.13	Armcx2	cKO_vs_wt	0.0109748	0.949458	0.00162414	0.999978	-0.0143231	0.99997	170.946	63.618	172.065	64.3715
ENSMUSG00000078427.3	Sarnp	cKO_vs_wt	-0.0454757	0.753464	-0.159995	0.999978	-0.128131	0.99997	169.578	8.17023	163.975	7.50658
ENSMUSG00000071708.11	Sms	cKO_vs_wt	0.0252215	0.905637	-0.0902951	0.999978	-0.191896	0.99997	158.185	0.232286	160.82	0.242742
ENSMUSG00000019977.16	Hbs1l	cKO_vs_wt	0.0263949	0.857415	-0.0866867	0.999978	-0.118402	0.99997	160.61	81.6188	163.295	77.7299
ENSMUSG00000032740.16	Ccdc88a	cKO_vs_wt	0.087212	0.45179	-0.00761395	0.999978	-0.0991875	0.99997	170.303	135.057	180.767	135.617
ENSMUSG00000028402.18	Mpdz	cKO_vs_wt	-0.0388028	0.801297	-0.0475441	0.999978	-0.0140259	0.99997	170.288	161.699	165.602	158.219
ENSMUSG00000038025.8	Phf2	cKO_vs_wt	0.100968	0.339161	-0.000147303	0.999978	-0.107203	0.99997	169.943	72.0558	182.005	72.9845
ENSMUSG00000052293.14	Taf9	cKO_vs_wt	0.0406894	0.780929	-0.226152	0.999978	-0.26963	0.874918	162.829	21.749	167.199	18.7271
ENSMUSG00000052752.15	Traf7	cKO_vs_wt	-0.0507399	0.730006	0.0446853	0.999978	0.0898704	0.99997	170.111	47.7577	164.007	49.9193
ENSMUSG00000027883.15	Gpsm2	cKO_vs_wt	-0.00251548	0.988125	-0.0518648	0.999978	-0.0538746	0.99997	170.017	182.04	169.404	177.431
ENSMUSG00000072082.7	Ccnf	cKO_vs_wt	-0.12096	0.0987615	-0.0941365	0.999978	0.0238448	0.99997	169.924	140.004	156.023	132.571
ENSMUSG00000029168.14	Dpysl5	cKO_vs_wt	-0.0574683	0.690854	-0.0636123	0.999978	-0.0103329	0.99997	169.717	283.593	162.97	274.872
ENSMUSG00000030980.17	Knop1	cKO_vs_wt	-0.0217022	0.899037	0.0191333	0.999978	0.035728	0.99997	166.324	94.6991	163.472	97.0191
ENSMUSG00000003235.13	Eif2b5	cKO_vs_wt	0.0103006	0.95103	-0.047655	0.999978	-0.0625919	0.99997	169.237	221.445	170.24	216.591
ENSMUSG00000003814.8	Calr	cKO_vs_wt	-0.0823063	0.884199	-0.0714775	0.999978	0.00840147	0.99997	169.334	320.164	159.508	307.496
ENSMUSG00000042590.17	Ipo11	cKO_vs_wt	0.0210244	0.906024	0.125346	0.999978	0.100631	0.99997	169.416	238.098	171.628	262.751
ENSMUSG00000032737.13	Inppl1	cKO_vs_wt	-0.0565156	0.541567	-0.00228673	0.999978	0.0488587	0.99997	169.068	79.2795	162.286	80.2241
ENSMUSG00000040669.14	Phc1	cKO_vs_wt	-0.000491261	0.997597	0.10603	0.999978	0.0993579	0.99997	168.56	50.4286	168.326	55.3292
ENSMUSG00000022521.10	Crebbp	cKO_vs_wt	-0.0615563	0.659763	-0.0828505	0.999978	-0.0252765	0.99997	168.905	171.049	161.673	163.161
ENSMUSG00000038690.15	Atp5j2	cKO_vs_wt	-0.0875415	0.595597	0.122003	0.999978	0.205975	0.99997	168.5	337.571	158.288	373.177
ENSMUSG00000030451.16	Herc2	cKO_vs_wt	0.00593625	0.983856	-0.149563	0.999978	-0.160191	0.99997	168.748	119.893	169.179	109.423
ENSMUSG00000027810.14	Eif2a	cKO_vs_wt	0.00982902	0.959239	0.0201716	0.999978	0.00593923	0.99997	167.63	127.473	168.449	130.771
ENSMUSG00000005779.12	Psmb4	cKO_vs_wt	0.38803	2.06385e-14	-0.0422843	0.999978	-0.433988	5.64691e-07	168.517	605.936	220.08	596.216
ENSMUSG00000056211.13	R3hdm1	cKO_vs_wt	-0.0306543	0.803202	0.138929	0.999978	0.165719	0.839797	167.857	29.8911	164.017	33.1939
ENSMUSG00000074088.6	Snrnp40	cKO_vs_wt	0.205035	0.000536326	-0.0326188	0.999978	-0.240537	0.330465	168.294	327.8	193.69	324.087
ENSMUSG00000033596.5	Rfwd3	cKO_vs_wt	-0.0522364	0.653724	0.19465	0.999978	0.239182	0.599173	157.854	40.8014	152.092	47.3909
ENSMUSG00000002297.16	Dbf4	cKO_vs_wt	0.0979908	0.331128	-0.0155468	0.999978	-0.118617	0.99997	167.819	78.2116	179.443	78.3598
ENSMUSG00000039509.8	Nup133	cKO_vs_wt	-0.0265823	0.867625	-0.0637887	0.999978	-0.0415456	0.99997	167.65	304.915	164.288	295.093
ENSMUSG00000022781.8	Pak2	cKO_vs_wt	0.017108	0.917014	-0.012211	0.999978	-0.034498	0.99997	167.196	226.778	168.983	226.928
ENSMUSG00000038733.14	Wdr26	cKO_vs_wt	0.0364584	0.810298	-0.0580673	0.999978	-0.099005	0.99997	166.482	135.5	170.548	131.967
ENSMUSG00000027108.15	Ola1	cKO_vs_wt	0.024543	0.882219	0.0314898	0.999978	0.00312608	0.99997	166.909	180.179	169.38	185.785
ENSMUSG00000034931.15	Dhx8	cKO_vs_wt	-0.0324702	0.734083	-0.0974454	0.999978	-0.0690968	0.99997	166.816	162.823	162.858	154.241
ENSMUSG00000075706.10	Gpx4	cKO_vs_wt	-0.0705147	0.525731	-0.0211122	0.999978	0.043873	0.99997	162.172	45.2254	154.151	45.0358
ENSMUSG00000102976.6	Zc3h11a	cKO_vs_wt	-0.0693755	0.534515	-0.0309331	0.999978	0.0335528	0.99997	166.528	36.6529	158.435	36.3088
ENSMUSG00000116275.1	Zc3h11a	cKO_vs_wt	-0.0693755	0.534515	-0.0309331	0.999978	0.0335528	0.99997	166.528	36.6529	158.435	36.3088
ENSMUSG00000003778.14	Brd8	cKO_vs_wt	-0.0895343	0.282986	-0.0236097	0.999978	0.0622765	0.99997	166.528	121.92	156.217	121.103
ENSMUSG00000024542.9	Cep192	cKO_vs_wt	-0.0860573	0.243977	0.0344232	0.999978	0.116686	0.99997	166.442	79.6472	156.571	82.3329
ENSMUSG00000022757.19	Tfg	cKO_vs_wt	-0.0159567	0.922275	0.0408473	0.999978	0.0521691	0.99997	166.23	289.455	164.097	301.037
ENSMUSG00000020166.15	Cnot2	cKO_vs_wt	-0.0195283	0.887114	0.0234928	0.999978	0.0383121	0.99997	165.841	147.674	163.28	151.514
ENSMUSG00000026554.15	Dcaf8	cKO_vs_wt	0.00669911	0.963921	-0.0331563	0.999978	-0.0448918	0.99997	166.186	151.301	166.651	149.83
ENSMUSG00000076437.10	Selenoh	cKO_vs_wt	0.335733	1.133e-05	0.0126989	0.999978	-0.326799	0.599173	165.98	445.101	208.967	454.782
ENSMUSG00000005656.9	Snx6	cKO_vs_wt	-0.0326934	0.787099	0.0227122	0.999978	0.0514002	0.99997	166.005	353.098	161.885	361.902
ENSMUSG00000001517.14	Foxm1	cKO_vs_wt	-0.041251	0.750219	0.0582061	0.999978	0.0928273	0.99997	165.545	52.0389	160.714	55.1117
ENSMUSG00000020076.7	Ddx50	cKO_vs_wt	0.0718547	0.399625	-0.0452434	0.999978	-0.120493	0.99997	165.424	78.9955	173.655	77.1588
ENSMUSG00000028514.15	Usp24	cKO_vs_wt	0.0223535	0.907871	-0.0286672	0.999978	-0.0562842	0.99997	165.708	115.422	168.067	114.586
ENSMUSG00000063358.17	Mapk1	cKO_vs_wt	-0.0416756	0.643074	0.0929779	0.999978	0.130227	0.741584	165.587	325.138	160.578	351.061
ENSMUSG00000018974.7	Sart3	cKO_vs_wt	0.0333633	0.783155	-0.0244407	0.999978	-0.0620259	0.99997	165.393	186.07	168.972	185.599
ENSMUSG00000019494.14	Cops6	cKO_vs_wt	-0.0361418	0.745816	-0.00528551	0.999978	0.0276911	0.99997	165.561	443.859	161.222	446.993
ENSMUSG00000020739.11	Nup85	cKO_vs_wt	-0.00231135	0.988252	0.00385577	0.999978	0.00182319	0.99997	165.305	227.639	164.852	231.047
ENSMUSG00000070047.14	Fat1	cKO_vs_wt	-0.184667	0.69243	-0.120689	0.999978	0.0600717	0.99997	165.321	106.219	145.044	98.5973
ENSMUSG00000037572.17	Wdhd1	cKO_vs_wt	-0.000929096	0.995701	-0.0729558	0.999978	-0.07631	0.99997	165.257	192.445	164.776	184.694
ENSMUSG00000058301.8	Upf1	cKO_vs_wt	0.099458	0.268418	-2.18642e-05	0.999978	-0.104287	0.99997	164.885	296.66	176.316	300.973
ENSMUSG00000055491.14	Pprc1	cKO_vs_wt	-0.0535894	0.588753	0.00849379	0.999978	0.0579513	0.99997	165.062	123.948	158.87	126.224
ENSMUSG00000037475.15	Thoc2	cKO_vs_wt	0.0412989	0.813784	-0.0437332	0.999978	-0.0901491	0.99997	164.914	120.597	169.268	118.331
ENSMUSG00000020780.15	Srp68	cKO_vs_wt	-0.0210942	0.88653	-0.00731001	0.999978	0.00994649	0.99997	164.259	168.446	161.629	169.907
ENSMUSG00000027782.10	Kpna4	cKO_vs_wt	0.0932431	0.350969	0.0186605	0.999978	-0.079083	0.99997	164.595	267.017	175.298	273.314
ENSMUSG00000033031.13	Cip2a	cKO_vs_wt	0.00603466	0.97619	0.0422533	0.999978	0.0317319	0.99997	164.481	141.577	164.828	147.443
ENSMUSG00000028849.17	Map7d1	cKO_vs_wt	0.139611	0.0852043	-0.0882192	0.999978	-0.232535	0.336487	164.462	153.945	180.831	146.902
ENSMUSG00000027011.14	Ube2e3	cKO_vs_wt	0.0605931	0.538905	0.00888288	0.999978	-0.0552739	0.99997	163.434	148.712	170.286	151.778
ENSMUSG00000032058.14	Ppp2r1b	cKO_vs_wt	-0.0373139	0.780569	0.0470711	0.999978	0.0800312	0.99997	163.579	227.135	159.072	237.695
ENSMUSG00000024304.14	Cdh2	cKO_vs_wt	-0.129008	0.765595	-0.00640883	0.999978	0.120407	0.99997	153.445	138.269	139.969	139.065
ENSMUSG00000022812.14	Gsk3b	cKO_vs_wt	-0.0709188	0.59515	0.0463517	0.999978	0.113014	0.99997	163.769	235.898	155.8	246.468
ENSMUSG00000024370.17	Cdc23	cKO_vs_wt	0.000285478	0.998481	-0.0358131	0.999978	-0.0403046	0.99997	164.01	256.438	163.766	252.927
ENSMUSG00000038644.14	Pold1	cKO_vs_wt	-0.00123029	0.99533	-0.122568	0.999978	-0.125118	0.990749	163.682	241.557	163.32	225.095
ENSMUSG00000030189.15	Ybx3	cKO_vs_wt	0.0846247	0.399478	-0.0817916	0.999978	-0.169804	0.732247	163.756	252.55	173.354	241.275
ENSMUSG00000038902.14	Pogz	cKO_vs_wt	-0.0253268	0.848422	0.0360187	0.999978	0.0560659	0.99997	163.729	125.786	160.683	130.58
ENSMUSG00000034667.8	Xpot	cKO_vs_wt	0.00657804	0.965572	0.0297141	0.999978	0.0169121	0.99997	163.14	62.7764	163.662	65.1507
ENSMUSG00000020664.10	Dld	cKO_vs_wt	-0.0835698	0.426251	-0.090483	0.999978	-0.0108966	0.99997	163.391	236.768	153.951	224.553
ENSMUSG00000052915.14	Msl1	cKO_vs_wt	-0.0161752	0.915333	0.0836419	0.999978	0.0917731	0.99997	163.438	53.7684	161.384	57.9939
ENSMUSG00000018476.7	Kdm6b	cKO_vs_wt	0.0969886	0.39677	-0.0395538	0.999978	-0.142186	0.934876	163.258	73.9806	174.429	73.1219
ENSMUSG00000029176.13	Anapc4	cKO_vs_wt	0.118166	0.0592556	-0.00920224	0.999978	-0.131652	0.874918	163.107	221.13	176.699	222.277
ENSMUSG00000019428.16	Fkbp8	cKO_vs_wt	0.17475	0.0149783	-0.00611196	0.999978	-0.186049	0.834578	162.916	221.741	183.593	224.077
ENSMUSG00000023104.9	Rfc2	cKO_vs_wt	-0.0936734	0.322075	0.0462142	0.999978	0.134876	0.99997	163.073	111.999	152.478	117.47
ENSMUSG00000021273.11	Fdft1	cKO_vs_wt	-0.0629791	0.621075	-0.0315906	0.999978	0.0269306	0.99997	162.777	158.644	155.668	157.157
ENSMUSG00000008305.18	Tle1	cKO_vs_wt	-0.0210761	0.871106	-0.0880029	0.999978	-0.0718228	0.99997	162.51	102.897	159.897	97.9549
ENSMUSG00000028423.15	Nfx1	cKO_vs_wt	-0.0187461	0.883484	0.026158	0.999978	0.0423778	0.99997	162.613	129.467	160.258	133.111
ENSMUSG00000025410.10	Dctn2	cKO_vs_wt	0.109921	0.0293173	0.0354183	0.999978	-0.0795382	0.99997	160.349	358.886	172.679	372.277
ENSMUSG00000018765.5	Fxr2	cKO_vs_wt	-0.0354247	0.724695	-0.0784955	0.999978	-0.0478526	0.99997	162.594	141.829	158.337	135.751
ENSMUSG00000022456.17	2022-09-03	cKO_vs_wt	0.0703537	0.570533	0.00520372	0.999978	-0.0702804	0.99997	162.03	56.4438	169.982	57.4846
ENSMUSG00000001380.7	Hars	cKO_vs_wt	-0.0271103	0.838123	0.015286	0.999978	0.0384661	0.99997	162.157	251.832	158.856	257.627
ENSMUSG00000027210.20	Meis2	cKO_vs_wt	0.0469745	0.813195	0.0053016	0.999978	-0.0452261	0.99997	161.778	105.55	167.025	106.916
ENSMUSG00000031754.10	Nudt21	cKO_vs_wt	0.122575	0.10839	0.53882	0.999978	0.404587	0.99997	146.301	0.481242	158.894	0.715597
ENSMUSG00000020149.17	Rab1a	cKO_vs_wt	0.0373355	0.722979	-0.132629	0.999978	-0.175054	0.92838	161.424	285.481	165.378	262.961
ENSMUSG00000005204.12	Senp3	cKO_vs_wt	0.0580569	0.553067	-0.0346794	0.999978	-0.0969428	0.99997	161.527	90.289	167.827	89.0915
ENSMUSG00000035683.13	Melk	cKO_vs_wt	-0.0218159	0.892154	-0.0113658	0.999978	0.00624751	0.99997	161.568	274.812	158.791	275.264
ENSMUSG00000042772.15	Smg7	cKO_vs_wt	-0.00479972	0.975635	0.107373	0.999978	0.109036	0.99997	161.201	60.258	160.455	65.5469
ENSMUSG00000037544.14	Dlgap5	cKO_vs_wt	-0.0340441	0.820117	-0.0904289	0.999978	-0.0591939	0.99997	161.251	213.552	157.227	202.844
ENSMUSG00000021990.15	Spata13	cKO_vs_wt	-0.0601201	0.631476	0.0219335	0.999978	0.0769643	0.99997	161.289	161.901	154.422	165.975
ENSMUSG00000052798.13	Nup107	cKO_vs_wt	-0.0539125	0.642644	-0.0733691	0.999978	-0.0229497	0.99997	161.422	189.58	155.211	182.32
ENSMUSG00000036529.17	Sbf1	cKO_vs_wt	-0.0681841	0.59515	-0.174737	0.999978	-0.110993	0.99997	161.305	76.5867	153.716	68.6963
ENSMUSG00000079215.8	Zfp664	cKO_vs_wt	0.0193177	0.911944	-0.0969834	0.999978	-0.125819	0.99997	161.241	15.3014	163.249	14.5279
ENSMUSG00000030983.4	Bccip	cKO_vs_wt	0.0144532	0.945766	-0.0930982	0.999978	-0.111811	0.99997	161.149	160.973	162.5	152.412
ENSMUSG00000018401.17	Mtmr4	cKO_vs_wt	-0.126043	0.0905264	-0.0772735	0.999978	0.0435362	0.99997	160.991	172.499	147.357	165.294
ENSMUSG00000001847.14	Rac1	cKO_vs_wt	-0.0510917	0.605413	-0.13188	0.999978	-0.0841032	0.99997	160.999	385.589	155.229	356.121
ENSMUSG00000015755.16	Tab2	cKO_vs_wt	-0.0962067	0.240176	-0.0116248	0.999978	0.0810282	0.99997	160.886	45.727	150.462	45.7721
ENSMUSG00000022272.17	Myo10	cKO_vs_wt	-0.109334	0.321765	-0.0884512	0.999978	0.0162397	0.99997	160.682	129.773	148.817	123.218
ENSMUSG00000055319.8	Sec23ip	cKO_vs_wt	-0.0487629	0.605413	0.000468626	0.999978	0.0467334	0.99997	160.698	152.191	155.088	153.725
ENSMUSG00000024975.13	Pdcd4	cKO_vs_wt	0.145388	0.619963	0.0453143	0.999978	-0.103326	0.99997	160.086	421.741	176.598	439.949
ENSMUSG00000027223.15	Mapk8ip1	cKO_vs_wt	0.278574	1.59722e-05	-0.0209455	0.999978	-0.304422	0.731581	160.504	87.4089	194.384	87.7332
ENSMUSG00000032244.9	Fem1b	cKO_vs_wt	-0.1011	0.307088	-0.0053119	0.999978	0.0911219	0.99997	160.738	207.879	149.688	209.201
ENSMUSG00000049553.11	Polr1a	cKO_vs_wt	-0.0131665	0.934681	-0.10096	0.999978	-0.0890807	0.99997	160.522	104.259	158.774	98.4505
ENSMUSG00000022048.8	Dpysl2	cKO_vs_wt	-0.0819534	0.532917	-0.0559557	0.999978	0.0224429	0.99997	160.176	1613.81	151.275	1570.66
ENSMUSG00000032624.16	Eml4	cKO_vs_wt	0.00587981	0.971847	-0.040059	0.999978	-0.0502958	0.99997	160.348	144.136	160.817	141.75
ENSMUSG00000040331.16	Nsmce4a	cKO_vs_wt	0.0618372	0.552329	-0.018865	0.999978	-0.083993	0.99997	160.539	289.456	167.266	289.358
ENSMUSG00000004591.16	Pkn2	cKO_vs_wt	-0.0168606	0.911233	-0.0815241	0.999978	-0.0695634	0.99997	160.174	135.036	158.027	129.119
ENSMUSG00000039985.14	Sinhcaf	cKO_vs_wt	-0.0450857	0.677351	0.476624	0.999978	0.484018	0.99997	134.902	0.205328	130.571	0.299842
ENSMUSG00000015023.7	Ddx19a	cKO_vs_wt	0.0469618	0.65808	-0.213395	0.999978	-0.265781	0.302595	143.58	116.716	148.043	102.07
ENSMUSG00000035632.16	Cnot3	cKO_vs_wt	0.0640061	0.463241	0.000470722	0.999978	-0.0674848	0.99997	160.055	109.292	167.159	110.713
ENSMUSG00000017843.14	Ppp2r5c	cKO_vs_wt	-0.062299	0.485571	-0.00928318	0.999978	0.0467271	0.99997	160.053	89.2311	153.136	89.7522
ENSMUSG00000020458.16	Rtn4	cKO_vs_wt	0.0248523	0.911944	-0.00232554	0.999978	-0.0298611	0.99997	160.058	255.393	162.518	258.278
ENSMUSG00000041997.16	Tlk1	cKO_vs_wt	-0.00476474	0.978173	0.00715166	0.999978	0.00683634	0.99997	159.738	57.4473	158.997	58.3504
ENSMUSG00000024294.14	Mib1	cKO_vs_wt	0.0823293	0.651008	0.0114934	0.999978	-0.0756986	0.99997	159.894	185.951	169.018	189.044
ENSMUSG00000002812.4	Flii	cKO_vs_wt	-0.0310821	0.802159	-0.0889243	0.999978	-0.0611535	0.99997	159.769	152.423	156.129	144.996
ENSMUSG00000020340.16	Cyfip2	cKO_vs_wt	-0.140464	0.0120508	-0.0243604	0.999978	0.112406	0.991212	159.686	127.335	144.658	126.509
ENSMUSG00000024817.13	Uhrf2	cKO_vs_wt	0.0402643	0.709093	-0.0245915	0.999978	-0.0684739	0.99997	159.729	164.205	163.929	162.869
ENSMUSG00000051768.9	Xrcc1	cKO_vs_wt	-0.0563929	0.631476	-0.0421205	0.999978	0.0105919	0.99997	159.585	141.573	153.103	139.381
ENSMUSG00000057177.12	Gsk3a	cKO_vs_wt	-0.0151145	0.925055	-0.136139	0.999978	-0.124358	0.99997	159.563	117.803	157.748	108.558
ENSMUSG00000032826.18	Ank2	cKO_vs_wt	-0.1126	0.458444	-0.0802092	0.999978	0.0264067	0.99997	158.853	101.465	146.804	96.8487
ENSMUSG00000034868.9	Myl12b	cKO_vs_wt	-0.0288984	0.869949	-0.140619	0.999978	-0.118631	0.99997	157.405	110.336	153.945	101.445
ENSMUSG00000020211.15	Sf3a2	cKO_vs_wt	0.057926	0.572266	-0.0373646	0.999978	-0.0983134	0.99997	159.378	131.963	165.562	130.186
ENSMUSG00000021693.20	Kif2a	cKO_vs_wt	0.0496213	0.614401	-0.0649524	0.999978	-0.117466	0.92838	159.262	165.702	164.615	160.051
ENSMUSG00000002055.9	Spag5	cKO_vs_wt	-0.0435282	0.771573	0.0360763	0.999978	0.0767441	0.99997	159.157	145.041	154.251	150.269
ENSMUSG00000020687.13	Cdc27	cKO_vs_wt	0.0312798	0.857415	0.00640192	0.999978	-0.0295113	0.99997	159.066	118.42	162.347	120.1
ENSMUSG00000030079.15	Ruvbl1	cKO_vs_wt	0.0369881	0.813195	-0.0702591	0.999978	-0.111698	0.99997	154.744	67.5009	158.416	64.9497
ENSMUSG00000024238.15	Zeb1	cKO_vs_wt	-0.0993438	0.424934	-0.0229088	0.999978	0.0708353	0.99997	158.717	109.233	148.018	108.723
ENSMUSG00000032254.10	Kif23	cKO_vs_wt	-0.0292809	0.858565	-0.105262	0.999978	-0.0788228	0.99997	158.867	170.888	155.394	160.49
ENSMUSG00000013236.17	Ptprs	cKO_vs_wt	-0.000105887	0.999698	0.0339169	0.999978	0.0301691	0.99997	158.546	76.1661	158.079	79.0528
ENSMUSG00000021258.10	Ccnk	cKO_vs_wt	-0.0468596	0.760581	0.00491991	0.999978	0.0477849	0.99997	157.804	68.4714	152.518	69.5445
ENSMUSG00000040761.16	Spen	cKO_vs_wt	0.00819234	0.979777	-0.245573	0.999978	-0.261427	0.67741	157.737	53.8824	158.345	45.9721
ENSMUSG00000034160.13	Ogt	cKO_vs_wt	-0.155862	0.0464988	-0.0416522	0.999978	0.109558	0.99997	157.881	168.716	141.411	165.535
ENSMUSG00000020265.16	Sumo3	cKO_vs_wt	0.0114375	0.938114	-0.136345	0.999978	-0.153385	0.99997	157.932	189.565	158.922	175.038
ENSMUSG00000034525.7	Ice1	cKO_vs_wt	-0.0455796	0.754201	-0.0704444	0.999978	-0.030325	0.99997	157.858	62.5563	152.841	60.2159
ENSMUSG00000039852.17	Rere	cKO_vs_wt	-0.0650385	0.554781	-0.0234342	0.999978	0.0372718	0.99997	157.763	129.021	150.685	128.438
ENSMUSG00000057637.13	Prdm2	cKO_vs_wt	-0.0688894	0.567296	-0.0308047	0.999978	0.0334159	0.99997	157.695	72.1707	150.226	71.363
ENSMUSG00000001289.12	Pfdn5	cKO_vs_wt	-0.0894252	0.524396	-0.0331437	0.999978	0.0518164	0.99997	157.92	107.841	148.163	106.637
ENSMUSG00000059273.9	Zc3h4	cKO_vs_wt	0.147438	0.0239954	-0.0653866	0.999978	-0.217419	0.47483	157.798	154.269	174.526	149.087
ENSMUSG00000037210.16	Fam193a	cKO_vs_wt	0.00996474	0.954703	-0.0183368	0.999978	-0.0315161	0.99997	157.591	124.387	158.407	124.297
ENSMUSG00000029833.17	Trim24	cKO_vs_wt	0.0303485	0.790515	0.0477457	0.999978	0.0119873	0.99997	157.578	119.132	160.766	124.477
ENSMUSG00000029101.16	Rgs12	cKO_vs_wt	0.0631447	0.506988	0.0169914	0.999978	-0.0482001	0.99997	157.171	99.5866	164.053	101.61
ENSMUSG00000068523.12	Gng5	cKO_vs_wt	0.0997294	0.280114	0.126788	0.999978	0.0221018	0.99997	157.076	44.6129	168.073	49.6155
ENSMUSG00000027429.16	Sec23b	cKO_vs_wt	-0.0489098	0.557052	-0.0751705	0.999978	-0.0301045	0.99997	156.706	200.876	151.257	192.604
ENSMUSG00000021782.14	Dlg5	cKO_vs_wt	0.0133626	0.9473	-0.00756813	0.999978	-0.0242549	0.99997	156.621	69.3675	157.991	69.629
ENSMUSG00000045095.16	Magi1	cKO_vs_wt	-0.0717218	0.402959	-0.0385858	0.999978	0.0292605	0.99997	156.458	92.0357	148.577	90.4928
ENSMUSG00000035621.13	Midn	cKO_vs_wt	0.38323	9.99232e-08	-0.055865	0.999978	-0.444235	0.00820616	156.369	296.936	203.55	290.285
ENSMUSG00000060279.14	Ap2a1	cKO_vs_wt	0.0284795	0.834445	0.0430463	0.999978	0.010012	0.99997	156.429	207.624	159.301	216.862
ENSMUSG00000028811.11	Yars	cKO_vs_wt	-0.0333628	0.797748	-0.000779362	0.999978	0.0280752	0.99997	156.323	204.439	152.447	206.595
ENSMUSG00000021549.14	Rasa1	cKO_vs_wt	0.0282163	0.854095	0.00781305	0.999978	-0.0250578	0.99997	156.362	101.04	159.266	102.888
ENSMUSG00000064127.13	Med14	cKO_vs_wt	0.0166114	0.901847	0.0233663	0.999978	0.000855944	0.99997	156.366	81.2973	157.98	83.5717
ENSMUSG00000031628.9	Casp3	cKO_vs_wt	-0.0216307	0.882763	0.0817104	0.999978	0.0998703	0.99997	156.227	331.055	153.625	353.975
ENSMUSG00000028465.16	Tln1	cKO_vs_wt	-0.113526	0.504171	-0.186201	0.999978	-0.0760358	0.99997	156.1	207.087	144.07	184.638
ENSMUSG00000020454.17	Eif4enif1	cKO_vs_wt	-0.0414671	0.630313	-0.0370969	0.999978	-0.00182278	0.99997	155.853	77.3665	151.242	76.4694
ENSMUSG00000024604.7	Rbm22	cKO_vs_wt	-0.0417895	0.760514	-0.110875	0.999978	-0.0745873	0.99997	155.831	139.45	151	130.674
ENSMUSG00000004263.15	Atn1	cKO_vs_wt	0.196731	0.00109522	0.0192737	0.999978	-0.181943	0.934876	155.813	46.2871	178.432	47.5368
ENSMUSG00000107478.1	Gm45234	cKO_vs_wt	0.196731	0.00109522	0.0192737	0.999978	-0.181943	0.934876	155.813	46.2871	178.432	47.5368
ENSMUSG00000098950.7	Gm28036	cKO_vs_wt	0.053457	0.673653	0.0337847	0.999978	-0.0227543	0.99997	155.69	142.755	161.359	147.572
ENSMUSG00000027203.15	Dut	cKO_vs_wt	0.121913	0.236785	0.0258422	0.999978	-0.100093	0.99997	155.531	707.838	168.905	728.506
ENSMUSG00000037552.17	Plekhg2	cKO_vs_wt	-0.0274899	0.848422	-0.00956805	0.999978	0.0111733	0.99997	155.571	62.1335	152.454	62.7793
ENSMUSG00000025404.15	R3hdm2	cKO_vs_wt	0.0489733	0.676886	0.0680774	0.999978	0.00911122	0.99997	155.105	18.1135	160.389	19.3698
ENSMUSG00000032382.14	Snx1	cKO_vs_wt	0.0438208	0.692389	-0.0427831	0.999978	-0.0913229	0.99997	154.89	160.038	159.362	157.241
ENSMUSG00000053841.15	Txlna	cKO_vs_wt	0.00947176	0.95889	-0.0144631	0.999978	-0.0284834	0.99997	155.052	200.29	155.796	200.762
ENSMUSG00000030934.9	Oat	cKO_vs_wt	-0.0500324	0.709871	-0.077035	0.999978	-0.0312652	0.99997	155.205	318.593	149.819	305.224
ENSMUSG00000038845.11	Phb	cKO_vs_wt	-0.0846114	0.322435	-0.131724	0.999978	-0.0564026	0.99997	144.906	22.0757	136.434	20.3884
ENSMUSG00000021819.11	Zswim8	cKO_vs_wt	0.0206413	0.883484	-0.00314417	0.999978	-0.0275662	0.99997	154.937	71.618	157.031	72.519
ENSMUSG00000029131.14	Dnajb6	cKO_vs_wt	0.163018	0.000391658	-0.0448527	0.999978	-0.174733	0.99997	146.733	1.18323	163.997	1.13968
ENSMUSG00000022119.15	Rbm26	cKO_vs_wt	0.0170482	0.904361	-0.0688342	0.999978	-0.0888173	0.99997	154.757	158.438	156.251	152.595
ENSMUSG00000028248.15	Pnisr	cKO_vs_wt	-0.0892775	0.483131	-0.0625975	0.999978	0.0247777	0.99997	154.121	114.576	144.516	110.694
ENSMUSG00000035021.13	Baz1a	cKO_vs_wt	-0.00584369	0.97424	-0.0384322	0.999978	-0.0359471	0.99997	153.778	131.027	152.872	129.063
ENSMUSG00000025268.15	Maged2	cKO_vs_wt	-0.0593827	0.675282	0.0238606	0.999978	0.0800185	0.99997	154.483	231.186	148.022	238.72
ENSMUSG00000032393.15	Dpp8	cKO_vs_wt	0.00536828	0.976455	0.07728	0.999978	0.0676266	0.99997	154.478	69.7136	154.86	74.3267
ENSMUSG00000032280.16	Tle3	cKO_vs_wt	0.0105666	0.954703	-0.00292908	0.999978	-0.0177217	0.99997	154.182	101.379	155.229	102.349
ENSMUSG00000018412.16	Kansl1	cKO_vs_wt	0.0222461	0.881355	0.0198941	0.999978	-0.00655051	0.99997	154.365	61.4776	156.672	62.8263
ENSMUSG00000042308.14	Setd1a	cKO_vs_wt	-0.0701412	0.402959	0.0036276	0.999978	0.0726666	0.99997	154.278	69.0804	146.722	69.7365
ENSMUSG00000061950.17	Ppp4r1	cKO_vs_wt	0.00500947	0.974682	-0.00351623	0.999978	-0.0135337	0.99997	154.226	148.829	154.619	150.414
ENSMUSG00000034297.14	Med13	cKO_vs_wt	-0.058123	0.777655	0.00575575	0.999978	0.0592987	0.99997	154.141	76.7876	147.871	77.7939
ENSMUSG00000018446.8	C1qbp	cKO_vs_wt	0.111595	0.343448	0.0791964	0.999978	-0.0364205	0.99997	154.18	519.321	166.246	553.662
ENSMUSG00000003033.15	Ap1m1	cKO_vs_wt	0.0604117	0.584491	-0.0242272	0.999978	-0.0886982	0.99997	153.816	164.563	160.199	163.687
ENSMUSG00000037058.16	Paip2	cKO_vs_wt	0.0180366	0.888951	0.0129186	0.999978	-0.00985997	0.99997	153.941	326.347	155.628	333
ENSMUSG00000024420.9	Zfp521	cKO_vs_wt	-0.0789096	0.452633	0.0128624	0.999978	0.0895723	0.99997	153.657	90.9072	145.304	92.6373
ENSMUSG00000025224.16	Gbf1	cKO_vs_wt	-0.073362	0.507173	-0.0305023	0.999978	0.0391819	0.99997	153.415	108.078	145.623	107.123
ENSMUSG00000019132.11	BC005537	cKO_vs_wt	-0.0189055	0.886261	-0.00790191	0.999978	-0.0127776	0.99997	153.628	7.01779	151.476	7.15102
ENSMUSG00000039671.18	Zmynd8	cKO_vs_wt	-0.00549835	0.967748	0.00804544	0.999978	0.0103593	0.99997	153.336	115.373	152.559	117.366
ENSMUSG00000020453.17	Patz1	cKO_vs_wt	0.0652389	0.541567	0.093671	0.999978	0.0238352	0.99997	153.394	155.691	160.269	168.17
ENSMUSG00000030678.7	Maz	cKO_vs_wt	0.404752	2.04631e-11	0.136384	0.999978	-0.273908	0.471	152.646	127.771	201.747	142.691
ENSMUSG00000028455.15	Stoml2	cKO_vs_wt	0.198362	0.000171089	0.0579697	0.999978	-0.143999	0.898892	153.036	155.635	175.415	164.345
ENSMUSG00000022033.9	Pbk	cKO_vs_wt	-0.0043868	0.98287	-0.0327269	0.999978	-0.0321704	0.99997	152.959	197.339	152.244	194.557
ENSMUSG00000031299.10	Pdha1	cKO_vs_wt	-0.0672233	0.512625	0.0193761	0.999978	0.0813837	0.99997	152.607	185.971	145.421	190.674
ENSMUSG00000031161.15	Hdac6	cKO_vs_wt	-0.0276269	0.880964	-0.0425699	0.999978	-0.0202862	0.99997	152.729	157.167	149.738	154.418
ENSMUSG00000028896.13	Rcc1	cKO_vs_wt	-0.0636784	0.59314	-0.00603134	0.999978	0.0535164	0.99997	152.57	243.48	145.721	245.616
ENSMUSG00000042354.7	Gnl3	cKO_vs_wt	0.0339292	0.829904	-0.0858163	0.999978	-0.122653	0.99997	151.979	146.558	155.363	139.469
ENSMUSG00000032218.7	Ccnb2	cKO_vs_wt	0.00902649	0.963003	-0.0198369	0.999978	-0.0334827	0.99997	152.461	205.101	153.233	204.915
ENSMUSG00000041781.9	Cpsf2	cKO_vs_wt	0.0492408	0.659829	-0.039391	0.999978	-0.0914873	0.99997	152.406	245.65	157.492	241.402
ENSMUSG00000041360.8	Pum3	cKO_vs_wt	0.0294988	0.81695	-0.0828126	0.999978	-0.115808	0.99997	151.928	162.858	154.76	155.264
ENSMUSG00000028986.12	Klhl7	cKO_vs_wt	0.0215551	0.911474	-0.105261	0.999978	-0.131507	0.99997	151.948	237.513	153.926	222.752
ENSMUSG00000024454.16	Hdac3	cKO_vs_wt	-0.022555	0.876771	0.00851171	0.999978	0.0275155	0.99997	151.683	159.294	149.181	161.753
ENSMUSG00000033799.10	Tasor2	cKO_vs_wt	0.0558841	0.719267	0.00535662	0.999978	-0.0552723	0.99997	151.685	76.0314	157.478	77.1891
ENSMUSG00000041852.15	Tcf20	cKO_vs_wt	0.0504301	0.735001	-0.0373108	0.999978	-0.0926425	0.99997	151.638	51.5039	156.913	50.6907
ENSMUSG00000014602.15	Kif1a	cKO_vs_wt	-0.0588101	0.699373	-0.032469	0.999978	0.0211272	0.99997	151.437	134.689	145.107	133.575
ENSMUSG00000004356.8	Utp20	cKO_vs_wt	-0.0394604	0.797093	-0.0579758	0.999978	-0.0227541	0.99997	151.463	149.491	147.164	145.302
ENSMUSG00000024070.15	Prkd3	cKO_vs_wt	-0.0247437	0.860608	0.0745502	0.999978	0.0937972	0.99997	151.524	76.3172	148.699	81.2599
ENSMUSG00000058290.4	Espl1	cKO_vs_wt	-0.0718277	0.321904	-0.0722128	0.999978	-0.00370147	0.99997	151.445	160.994	143.875	155.039
ENSMUSG00000043535.13	Setx	cKO_vs_wt	0.0390807	0.836222	-0.162897	0.999978	-0.206051	0.874918	151.316	91.304	155.305	82.1969
ENSMUSG00000037674.15	Rfx7	cKO_vs_wt	0.0236951	0.904361	-0.0212952	0.999978	-0.0498517	0.99997	151.233	78.5634	153.535	78.2835
ENSMUSG00000042439.13	Zfp532	cKO_vs_wt	0.0164224	0.93282	0.0214891	0.999978	0.000520429	0.99997	150.962	65.9482	152.628	67.6697
ENSMUSG00000003131.7	Pafah1b2	cKO_vs_wt	0.0802595	0.410606	-0.0430981	0.999978	-0.128441	0.99997	151.12	465.47	159.499	456.434
ENSMUSG00000001415.10	Smg5	cKO_vs_wt	0.0201445	0.911474	0.102801	0.999978	0.0769153	0.99997	150.466	43.9182	152.372	47.9557
ENSMUSG00000067367.9	Lyar	cKO_vs_wt	0.0575998	0.671097	-0.0913121	0.999978	-0.153161	0.99997	150.915	148.993	156.759	141.264
ENSMUSG00000024844.15	Banf1	cKO_vs_wt	-0.13285	0.171787	-0.194898	0.999978	-0.065548	0.99997	151.049	342.168	137.482	301.647
ENSMUSG00000002455.14	Prpf6	cKO_vs_wt	0.15728	0.67243	-0.0111951	0.999978	-0.172711	0.99997	150.97	218.782	168.256	220.48
ENSMUSG00000009630.10	Ppp2cb	cKO_vs_wt	0.0379331	0.727316	-0.0302155	0.999978	-0.0725098	0.99997	150.069	228.611	153.869	226.917
ENSMUSG00000069729.14	Arid1b	cKO_vs_wt	-0.00533315	0.97424	-0.0157257	0.999978	-0.0156604	0.99997	150.585	79.6893	149.777	79.9527
ENSMUSG00000024217.10	Snrpc	cKO_vs_wt	0.0961699	0.304904	-0.17557	0.999978	-0.280232	0.665027	147.421	43.7151	157.201	39.513
ENSMUSG00000020368.15	Canx	cKO_vs_wt	-0.127229	0.795939	-0.0947372	0.999978	0.0295847	0.99997	150.527	203.674	137.48	192.459
ENSMUSG00000041057.10	Wdr43	cKO_vs_wt	0.0505662	0.692641	-0.0187742	0.999978	-0.0738638	0.99997	150.619	180.493	155.65	179.908
ENSMUSG00000058258.14	Idi1	cKO_vs_wt	-0.0782184	0.654267	-0.0444528	0.999978	0.0304279	0.99997	88.2946	4.57552	83.5086	4.50332
ENSMUSG00000022338.8	Eny2	cKO_vs_wt	-0.047873	0.78832	0.0982673	0.999978	0.14365	0.996611	148.51	170.187	143.419	184.049
ENSMUSG00000029761.16	Cald1	cKO_vs_wt	-0.127358	0.428912	-0.173068	0.999978	-0.0487631	0.99997	150.191	163.996	137.381	146.949
ENSMUSG00000063445.14	Nmral1	cKO_vs_wt	-0.0478807	0.78893	0.00453188	0.999978	0.0489358	0.99997	150.348	388.486	145.156	394.267
ENSMUSG00000018425.18	Dhx40	cKO_vs_wt	0.130386	0.0627577	-0.00984682	0.999978	-0.14469	0.96896	150.221	126.84	164.136	127.454
ENSMUSG00000038708.10	Golga4	cKO_vs_wt	-0.066613	0.586121	0.0305913	0.999978	0.0918861	0.99997	150.111	75.15	143.15	77.4651
ENSMUSG00000048154.17	Kmt2d	cKO_vs_wt	0.0246597	0.960103	0.0252447	0.999978	-0.00501116	0.99997	150.021	88.808	152.29	91.9446
ENSMUSG00000054428.12	Atpif1	cKO_vs_wt	-0.0565578	0.766974	-0.0855648	0.999978	-0.0329831	0.99997	150.084	466.858	144.01	446.32
ENSMUSG00000042605.16	Atxn2	cKO_vs_wt	-0.0204459	0.901847	-0.0680939	0.999978	-0.052293	0.99997	149.382	90.61	147.017	87.6617
ENSMUSG00000025968.16	Ndufs1	cKO_vs_wt	-0.0281011	0.854095	-0.0636398	0.999978	-0.0398346	0.99997	149.385	235.506	146.219	227.5
ENSMUSG00000037343.8	Taf2	cKO_vs_wt	0.00773858	0.961673	0.0119639	0.999978	-0.000588157	0.99997	149.731	81.7046	150.365	83.2155
ENSMUSG00000035575.11	Utp6	cKO_vs_wt	0.00531028	0.973013	-0.0865523	0.999978	-0.0939562	0.99997	149.583	232.039	149.887	220.736
ENSMUSG00000049823.9	Zbtb12	cKO_vs_wt	0.0436493	0.751351	-0.185169	0.999978	-0.233327	0.224516	149.485	139.342	153.822	124.104
ENSMUSG00000029910.14	Mad2l1	cKO_vs_wt	-0.0514074	0.614401	0.00447943	0.999978	0.0506143	0.99997	149.543	88.8506	144.033	90.1998
ENSMUSG00000025156.17	Gps1	cKO_vs_wt	-0.0400618	0.711699	0.260248	0.999978	0.287769	0.692922	148.217	11.5962	143.897	14.181
ENSMUSG00000073838.10	Tufm	cKO_vs_wt	0.0285731	0.870577	0.235488	0.999978	0.205148	0.99997	143.081	9.50771	145.659	11.2354
ENSMUSG00000030876.7	Mettl9	cKO_vs_wt	0.121583	0.0319497	-0.00483494	0.999978	-0.132633	0.99997	149.343	34.6461	162.261	34.9428
ENSMUSG00000022992.17	Kansl2	cKO_vs_wt	-0.0775458	0.366312	0.0203333	0.999978	0.0991552	0.99997	124.855	3.91217	118.122	3.97047
ENSMUSG00000028882.13	Ppp1r8	cKO_vs_wt	-0.0511497	0.667951	0.0137241	0.999978	0.0600539	0.99997	148.984	205.061	143.465	209.474
ENSMUSG00000024384.4	Iws1	cKO_vs_wt	0.0175921	0.907331	0.0158897	0.999978	-0.00536833	0.99997	148.065	203.2	149.59	208.311
ENSMUSG00000025812.17	Pard3	cKO_vs_wt	0.0258177	0.872101	-0.0926143	0.999978	-0.121949	0.942844	148.911	113.401	151.404	107.257
ENSMUSG00000046201.9	Scaf8	cKO_vs_wt	0.00398157	0.976307	-0.0775849	0.999978	-0.0847158	0.99997	148.682	72.5655	148.951	69.5566
ENSMUSG00000001855.15	Nup214	cKO_vs_wt	-0.0724218	0.405139	-0.0684455	0.999978	-0.00100284	0.99997	148.771	120.653	141.332	116.537
ENSMUSG00000027282.17	Mtch2	cKO_vs_wt	0.0265136	0.842655	0.0615155	0.999978	0.0312696	0.99997	148.675	163.9	151.241	172.753
ENSMUSG00000046574.8	Prr12	cKO_vs_wt	0.220223	0.00136655	-0.101293	0.999978	-0.327364	0.0134369	148.359	92.8095	172.591	87.529
ENSMUSG00000017119.19	Nbr1	cKO_vs_wt	0.032099	0.774126	-0.0607808	0.999978	-0.09576	0.99997	148.38	133.632	151.582	129.526
ENSMUSG00000021266.16	Wars	cKO_vs_wt	-0.0226089	0.887477	-0.0509229	0.999978	-0.0320106	0.99997	148.579	192.205	146.016	187.991
ENSMUSG00000039219.18	Arid4b	cKO_vs_wt	0.0667024	0.575029	-0.00313956	0.999978	-0.0735407	0.99997	148.493	114.835	155.226	115.672
ENSMUSG00000033295.14	Ptprf	cKO_vs_wt	-0.133623	0.727675	0.0178993	0.999978	0.148582	0.99997	148.366	62.5403	134.962	64.0113
ENSMUSG00000027998.11	Plrg1	cKO_vs_wt	-0.0389278	0.802957	-0.0893191	0.999978	-0.054263	0.99997	148.062	259.201	143.864	245.956
ENSMUSG00000005687.14	Bcas2	cKO_vs_wt	-0.0527994	0.676886	0.0321855	0.999978	0.0811167	0.99997	148.255	330.874	142.663	343.072
ENSMUSG00000043940.15	Wdfy3	cKO_vs_wt	-0.0247422	0.944517	-0.0379426	0.999978	-0.0174151	0.99997	148.149	77.0635	145.484	76.1289
ENSMUSG00000001642.18	Akr1b3	cKO_vs_wt	-0.0173414	0.923584	-0.202942	0.999978	-0.18548	0.99997	146.217	5.58146	144.272	4.85594
ENSMUSG00000004096.9	Cwc15	cKO_vs_wt	-0.0721317	0.630313	-0.0159599	0.999978	0.0523453	0.99997	148.007	191.496	140.52	191.448
ENSMUSG00000037916.14	Ndufv1	cKO_vs_wt	-0.0716178	0.323543	-0.131232	0.999978	-0.0639622	0.99997	147.94	269.073	140.496	248.629
ENSMUSG00000062248.5	Cks2	cKO_vs_wt	-0.122172	0.322052	-0.246011	0.999978	-0.164755	0.99997	146.852	2.85656	134.737	2.53868
ENSMUSG00000030655.15	Smg1	cKO_vs_wt	-0.0324688	0.912441	0.0163456	0.999978	0.0429818	0.99997	147.718	80.0095	144.132	81.9293
ENSMUSG00000034317.14	Trim59	cKO_vs_wt	-0.0209291	0.919106	0.0617795	0.999978	0.078971	0.99997	147.557	118.141	145.14	124.369
ENSMUSG00000039994.15	Timeless	cKO_vs_wt	-0.0408631	0.650197	-0.104371	0.999978	-0.0659071	0.99997	147.757	161.305	143.387	151.766
ENSMUSG00000021555.15	Naa35	cKO_vs_wt	-0.014833	0.901473	-0.000843182	0.999978	0.0101673	0.99997	147.528	177.734	145.778	179.563
ENSMUSG00000027496.15	Aurka	cKO_vs_wt	-0.0472716	0.636984	-0.0365859	0.999978	0.00664191	0.99997	147.028	208.395	141.974	205.344
ENSMUSG00000026683.14	Nuf2	cKO_vs_wt	0.0102518	0.959151	-0.0247866	0.999978	-0.0388775	0.99997	147.484	142.147	148.309	140.967
ENSMUSG00000022437.7	Samm50	cKO_vs_wt	-0.0523828	0.623959	-0.124532	0.999978	-0.0766204	0.99997	147.202	168.315	141.688	156.094
ENSMUSG00000025758.10	Plk4	cKO_vs_wt	0.0125503	0.939021	0.094608	0.999978	0.0787206	0.99997	146.345	39.7234	147.386	42.85
ENSMUSG00000031731.16	Ap1g1	cKO_vs_wt	-0.0365317	0.727316	0.0095129	0.999978	0.0419846	0.99997	146.71	210.204	142.773	214.201
ENSMUSG00000033004.15	Mycbp2	cKO_vs_wt	-0.0160128	0.950192	-0.063783	0.999978	-0.0519628	0.99997	146.567	67.9756	144.707	65.5937
ENSMUSG00000041168.10	Lonp1	cKO_vs_wt	-0.0639984	0.494411	-0.109386	0.999978	-0.0504206	0.99997	146.324	147.05	139.638	138.178
ENSMUSG00000042043.6	Tbca	cKO_vs_wt	-0.0783777	0.577104	0.0366096	0.999978	0.110614	0.99997	146.518	114.54	138.501	118.959
ENSMUSG00000029632.7	Ndufa4	cKO_vs_wt	-0.127439	0.328602	-0.0317439	0.999978	0.0912537	0.99997	146.654	287.213	133.999	284.528
ENSMUSG00000031207.16	Msn	cKO_vs_wt	-0.0968882	0.135577	-0.156456	0.999978	-0.0633657	0.99997	146.647	352.21	136.809	319.462
ENSMUSG00000030528.12	Blm	cKO_vs_wt	0.00565677	0.978606	-0.126212	0.999978	-0.134748	0.99997	145.794	99.5566	146.159	91.9318
ENSMUSG00000020869.8	Lrrc59	cKO_vs_wt	-0.0387594	0.767778	-0.0162854	0.999978	0.0185347	0.99997	146.419	304.682	142.341	305.444
ENSMUSG00000022568.17	Scrib	cKO_vs_wt	-0.0789827	0.567174	-0.183647	0.999978	-0.110294	0.99997	146.224	86.0294	138.271	76.7756
ENSMUSG00000034573.14	Ptpn13	cKO_vs_wt	-0.0362138	0.870108	-0.0858734	0.999978	-0.0539517	0.99997	146.23	56.9764	142.546	54.1473
ENSMUSG00000043733.14	Ptpn11	cKO_vs_wt	0.0133069	0.939021	0.0494336	0.999978	0.0316408	0.99997	146.207	151.201	147.406	158.652
ENSMUSG00000037017.15	Zscan21	cKO_vs_wt	-0.0250489	0.834938	0.0164632	0.999978	0.0383193	0.99997	146.213	108.154	143.407	110.262
ENSMUSG00000025607.15	Copg2	cKO_vs_wt	-0.0401582	0.701117	0.024634	0.999978	0.0609572	0.99997	145.956	227.86	141.756	233.904
ENSMUSG00000031511.15	Arhgef7	cKO_vs_wt	0.0160627	0.925168	0.0467179	0.999978	0.0258248	0.99997	145.825	106.355	147.279	111.068
ENSMUSG00000020898.18	Ctc1	cKO_vs_wt	-0.0172755	0.909231	-0.0525057	0.999978	-0.0386039	0.99997	145.785	156.956	143.918	153.219
ENSMUSG00000024120.12	Lrpprc	cKO_vs_wt	0.00236096	0.987466	-0.0163279	0.999978	-0.0210521	0.99997	145.435	216.363	145.458	216.199
ENSMUSG00000022387.17	Brd1	cKO_vs_wt	0.0205192	0.876771	-0.172725	0.999978	-0.195892	0.473822	145.539	76.5427	147.462	68.4765
ENSMUSG00000021929.9	Kpna3	cKO_vs_wt	0.0351259	0.831159	-0.00979904	0.999978	-0.0487893	0.99997	145.701	247.046	148.968	247.962
ENSMUSG00000024099.15	Ndufv2	cKO_vs_wt	0.0229422	0.901844	-0.0073197	0.999978	-0.0355382	0.99997	145.319	225.843	147.33	227.395
ENSMUSG00000024943.9	Smc5	cKO_vs_wt	-0.000300834	0.998481	-0.129332	0.999978	-0.133278	0.99997	145.48	173.918	145.117	160.67
ENSMUSG00000018377.10	Vezf1	cKO_vs_wt	-0.00502071	0.978622	0.0451703	0.999978	0.0445749	0.99997	145.5	107.686	144.782	112.789
ENSMUSG00000025747.12	Tyms	cKO_vs_wt	9.44561e-05	0.999436	0.0197317	0.999978	0.0163142	0.99997	145.237	195.938	145.031	200.854
ENSMUSG00000065947.3	mt-Nd4l	cKO_vs_wt	0.0252638	0.971825	NA	NA	-0.0882899	0.99997	4.0318	0	4.0823	0
ENSMUSG00000056612.7	Ppp1r14b	cKO_vs_wt	0.041826	0.793611	0.38344	0.999978	0.338443	0.836627	138.777	8.44661	142.66	11.2379
ENSMUSG00000034218.16	Atm	cKO_vs_wt	0.0315876	0.885531	-0.00372468	0.999978	-0.0402932	0.99997	144.708	117.115	147.652	118.054
ENSMUSG00000022193.7	Psmb5	cKO_vs_wt	-0.063101	0.692511	-0.00365466	0.999978	0.053458	0.99997	141.286	78.4834	134.964	79.4541
ENSMUSG00000005469.10	Prkaca	cKO_vs_wt	-0.0728178	0.479304	-0.0435889	0.999978	0.0253011	0.99997	144.58	200.165	137.384	196.861
ENSMUSG00000025047.9	Pdcd11	cKO_vs_wt	-0.0902255	0.255199	-0.192047	0.999978	-0.105361	0.99997	144.511	159.49	135.592	141.294
ENSMUSG00000025403.5	Shmt2	cKO_vs_wt	0.0109789	0.957766	-0.0543326	0.999978	-0.0691293	0.99997	144.45	217.635	145.237	212.097
ENSMUSG00000021326.13	Trim27	cKO_vs_wt	0.122882	0.0189447	-0.0183351	0.999978	-0.144778	0.802911	144.39	155.537	157.126	155.173
ENSMUSG00000025439.5	Clns1a	cKO_vs_wt	0.142832	0.0380476	-0.0402067	0.999978	-0.188084	0.947227	144.048	383.477	158.652	376.223
ENSMUSG00000028405.9	Aco1	cKO_vs_wt	-0.0424326	0.741197	-0.143467	0.999978	-0.104197	0.99997	144.212	154.038	139.912	140.861
ENSMUSG00000026991.20	Pkp4	cKO_vs_wt	0.0283033	0.806081	0.126209	0.999978	0.0904216	0.99997	143.214	39.3117	145.857	43.4969
ENSMUSG00000040824.3	Snrpd2	cKO_vs_wt	-0.161803	0.297904	0.184974	0.999978	0.345902	0.99997	143.921	112.493	128.379	130.443
ENSMUSG00000036180.15	Gatad2a	cKO_vs_wt	-0.0286857	0.84555	0.0423647	0.999978	0.0664064	0.99997	143.264	105.745	140.346	110.564
ENSMUSG00000029475.17	Kdm2b	cKO_vs_wt	0.100254	0.135577	0.118505	0.999978	0.0118081	0.99997	128.232	56.4096	137.29	62.2296
ENSMUSG00000035770.8	Dync1li2	cKO_vs_wt	-0.0162824	0.909231	0.0362189	0.999978	0.0475843	0.99997	143.529	170.187	141.685	176.638
ENSMUSG00000032966.14	Fkbp1a	cKO_vs_wt	0.105867	0.0412033	0.0389523	0.999978	-0.0714196	0.99997	143.512	179.452	154.245	186.843
ENSMUSG00000026484.13	Rnf2	cKO_vs_wt	0.00510117	0.978774	0.0777689	0.999978	0.0669208	0.99997	143.34	216.293	143.534	230.915
ENSMUSG00000016253.12	Nelfcd	cKO_vs_wt	-0.0941042	0.204993	0.0792749	0.999978	0.168984	0.467371	143.35	243.956	134.064	261.09
ENSMUSG00000022789.15	Dnm1l	cKO_vs_wt	-0.0327159	0.82493	-0.0484335	0.999978	-0.0203019	0.99997	143.163	148.147	139.617	144.974
ENSMUSG00000009863.14	Sdhb	cKO_vs_wt	-0.00215612	0.99264	0.0306513	0.999978	0.0285712	0.99997	143.268	331.102	142.774	342.796
ENSMUSG00000039191.12	Rbpj	cKO_vs_wt	-0.0405888	0.779439	-0.180992	0.999978	-0.137391	0.99997	128.702	9.81839	124.942	8.70671
ENSMUSG00000061755.10	Bod1l	cKO_vs_wt	-0.00612239	0.979315	-0.0378828	0.999978	-0.0361869	0.99997	143.157	98.0725	142.342	96.7088
ENSMUSG00000040661.6	Rad54l2	cKO_vs_wt	-0.0665142	0.620422	0.0171199	0.999978	0.0780813	0.99997	143.055	69.5954	136.437	71.58
ENSMUSG00000031245.8	Hmgn5	cKO_vs_wt	0.0495887	0.784518	-0.100477	0.999978	-0.154966	0.99997	142.169	168.888	146.769	158.876
ENSMUSG00000030374.15	Strn4	cKO_vs_wt	0.0249842	0.881355	-0.0483229	0.999978	-0.0768599	0.99997	142.982	127.275	145.39	124.68
ENSMUSG00000021193.10	Pitrm1	cKO_vs_wt	-0.0094361	0.952059	-0.0270012	0.999978	-0.0217477	0.99997	142.78	155.538	141.627	154.64
ENSMUSG00000039298.16	Cdk5rap2	cKO_vs_wt	-0.0380046	0.803338	-0.0807422	0.999978	-0.047092	0.99997	142.557	118.955	138.625	113.657
ENSMUSG00000018160.15	Med1	cKO_vs_wt	-0.0246549	0.862387	-0.0799497	0.999978	-0.0606712	0.99997	142.708	74.4189	140.092	71.2638
ENSMUSG00000026245.16	Farsb	cKO_vs_wt	-0.0269874	0.862692	-0.0205902	0.999978	0.00232391	0.99997	142.669	208.389	139.745	207.267
ENSMUSG00000051934.5	Spats2	cKO_vs_wt	-0.0226534	0.876771	-0.0581391	0.999978	-0.0398486	0.99997	142.375	119.739	139.986	115.991
ENSMUSG00000047036.8	Zfp445	cKO_vs_wt	-0.0453641	0.724185	-0.0524961	0.999978	-0.0115988	0.99997	142.558	78.1296	137.905	75.9955
ENSMUSG00000020694.17	Tlk2	cKO_vs_wt	0.0656813	0.335572	0.0967006	0.999978	0.0260264	0.99997	142.303	78.8514	148.652	85.261
ENSMUSG00000030890.16	Ilk	cKO_vs_wt	0.0208035	0.885193	-0.0651808	0.999978	-0.0914713	0.99997	142.362	137.837	144.154	133.15
ENSMUSG00000024695.15	Zfp91	cKO_vs_wt	0.0537767	0.708578	0.0326918	0.999978	-0.0247935	0.99997	142.075	68.4502	147.154	71.113
ENSMUSG00000014426.9	Map3k4	cKO_vs_wt	-0.0358499	0.806667	-0.0177502	0.999978	0.0141243	0.99997	141.973	103.748	138.336	103.751
ENSMUSG00000032560.14	Dnajc13	cKO_vs_wt	-0.0851133	0.3849	-0.0826074	0.999978	0.000725799	0.99997	142.029	81.9659	133.719	78.0923
ENSMUSG00000054611.17	Kdm2a	cKO_vs_wt	-0.0493906	0.661885	-0.0341086	0.999978	0.0114611	0.99997	141.939	119.738	137.013	118.064
ENSMUSG00000039768.16	Dnajc11	cKO_vs_wt	-0.0193743	0.901473	0.0131081	0.999978	0.0291487	0.99997	141.881	172.922	139.779	176.534
ENSMUSG00000039041.15	Adrm1	cKO_vs_wt	0.111819	0.10314	0.166079	0.999978	0.0418944	0.99997	135.139	20.3205	145.753	23.3535
ENSMUSG00000079184.10	Mphosph8	cKO_vs_wt	0.120516	0.17142	-0.00404047	0.999978	-0.127913	0.99997	141.66	92.7837	153.711	93.2683
ENSMUSG00000029621.14	Arpc1a	cKO_vs_wt	-0.0748495	0.431022	-0.0452735	0.999978	0.0250952	0.99997	141.443	125.569	134.15	122.928
ENSMUSG00000022400.9	Rbx1	cKO_vs_wt	-0.0921509	0.512208	-0.154709	0.999978	-0.0676253	0.99997	141.433	86.136	132.414	78.2233
ENSMUSG00000039515.11	Ptpa	cKO_vs_wt	-0.0290979	0.839358	0.0565051	0.999978	0.0813764	0.99997	141.5	142.362	138.434	150.196
ENSMUSG00000024515.13	Smad4	cKO_vs_wt	0.190719	0.00266795	-0.0465214	0.999978	-0.243202	0.251548	141.228	216.686	160.96	212.477
ENSMUSG00000117310.1	Ptp4a1	cKO_vs_wt	0.0126764	0.93669	-0.0138917	0.999978	-0.0298592	0.99997	98.9528	0.709375	99.692	0.705842
ENSMUSG00000036377.18	C530008M17Rik	cKO_vs_wt	0.0603804	0.707703	0.0591606	0.999978	-0.00584391	0.99997	141.169	69.0367	147.052	73.1538
ENSMUSG00000025027.18	Xpnpep1	cKO_vs_wt	-0.0542927	0.64228	0.00729468	0.999978	0.057834	0.99997	141.131	188.028	135.639	191.587
ENSMUSG00000018921.11	Pelp1	cKO_vs_wt	-0.0194214	0.892048	-0.0227771	0.999978	-0.00857679	0.99997	141.267	148.785	139.103	148.419
ENSMUSG00000047284.14	Neurl4	cKO_vs_wt	-0.0437984	0.737952	0.0202414	0.999978	0.0601804	0.99997	141.236	77.4764	136.896	79.5515
ENSMUSG00000060510.14	Zfp266	cKO_vs_wt	-0.0665274	0.603988	-0.00580935	0.999978	0.0565628	0.99997	141.077	189.047	134.502	189.983
ENSMUSG00000058594.15	Fbh1	cKO_vs_wt	0.0333106	0.775384	-0.0179025	0.999978	-0.0557623	0.99997	141.119	84.6677	144.278	84.4993
ENSMUSG00000028792.14	Ak2	cKO_vs_wt	-0.0318511	0.852622	0.0115865	0.999978	0.0394466	0.99997	140.991	214.586	137.625	219.232
ENSMUSG00000026764.15	Kif5c	cKO_vs_wt	-0.033593	0.828833	-0.0085676	0.999978	0.0201381	0.99997	141.124	191.686	137.702	192.744
ENSMUSG00000058006.12	Mdn1	cKO_vs_wt	0.0388436	0.883484	-0.0282373	0.999978	-0.0721229	0.99997	140.86	154.106	144.442	153.002
ENSMUSG00000022024.10	Sugt1	cKO_vs_wt	0.00172204	0.993263	-0.13124	0.999978	-0.137794	0.948314	140.879	203.472	140.754	188.036
ENSMUSG00000022332.8	Khdrbs3	cKO_vs_wt	0.0130069	0.944638	-0.0298173	0.999978	-0.0462656	0.99997	140.738	84.3794	141.814	83.4121
ENSMUSG00000047879.17	Usp14	cKO_vs_wt	0.0727569	0.58948	0.0373338	0.999978	-0.0401666	0.99997	140.711	228.315	147.666	236.61
ENSMUSG00000041297.8	Cdk13	cKO_vs_wt	0.047995	0.614113	-0.0235501	0.999978	-0.0751271	0.99997	140.53	105.744	145.101	105.111
ENSMUSG00000049470.13	Aff4	cKO_vs_wt	-0.0210546	0.944683	-0.0704336	0.999978	-0.0549146	0.99997	140.435	122.481	138.332	117.839
ENSMUSG00000039959.13	Hip1	cKO_vs_wt	-0.0790301	0.497569	0.0204919	0.999978	0.0947433	0.99997	140.39	141.164	132.813	145.276
ENSMUSG00000004789.10	Dlst	cKO_vs_wt	-0.0479773	0.688117	-0.0229918	0.999978	0.02166	0.99997	140.388	188.368	135.537	187.296
ENSMUSG00000020716.16	Nf1	cKO_vs_wt	-0.0358018	0.881797	0.0193546	0.999978	0.0497211	0.99997	140.231	123.118	136.59	126.145
ENSMUSG00000049739.10	Zfp646	cKO_vs_wt	0.00978614	0.955527	-0.110638	0.999978	-0.125446	0.990749	140.332	42.9198	141.13	40.0944
ENSMUSG00000006678.6	Pola1	cKO_vs_wt	-0.0114835	0.959665	-0.0847257	0.999978	-0.0773885	0.99997	139.896	198.405	138.518	188.891
ENSMUSG00000029538.14	Srsf9	cKO_vs_wt	0.0396341	0.727316	-0.0710801	0.999978	-0.11405	0.99997	139.787	384.452	143.455	371.041
ENSMUSG00000020463.15	Ppp4r3b	cKO_vs_wt	0.0646971	0.664194	-0.0723347	0.999978	-0.14077	0.99997	139.425	112.515	145.629	108.099
ENSMUSG00000038388.14	Mpp6	cKO_vs_wt	0.052113	0.611021	0.129052	0.999978	0.0713804	0.99997	139.529	62.6798	144.483	69.4353
ENSMUSG00000015889.8	Lta4h	cKO_vs_wt	0.0978562	0.0937316	-0.0490446	0.999978	-0.150777	0.646372	139.722	283.996	149.26	277.619
ENSMUSG00000029414.11	Kntc1	cKO_vs_wt	-0.105293	0.146467	-0.00975622	0.999978	0.0920911	0.99997	139.581	108.635	129.566	109.176
ENSMUSG00000033943.15	Mga	cKO_vs_wt	-0.0115367	0.965898	-0.0643083	0.999978	-0.0577951	0.99997	139.305	104.945	137.975	101.203
ENSMUSG00000020918.14	Kat2a	cKO_vs_wt	0.0129387	0.940396	0.0336473	0.999978	0.0166191	0.99997	139.395	107.327	140.458	111.483
ENSMUSG00000067851.11	Arfgef1	cKO_vs_wt	0.105964	0.30345	-0.0899582	0.999978	-0.200253	0.646331	139.365	61.5683	149.88	58.3274
ENSMUSG00000021156.17	Zmynd11	cKO_vs_wt	0.0222784	0.883101	0.0300064	0.999978	0.00156948	0.99997	139.246	70.06	141.221	72.5025
ENSMUSG00000022246.14	Rai14	cKO_vs_wt	-0.0449192	0.847872	-0.0223563	0.999978	0.0178061	0.99997	139.276	131.252	134.868	130.808
ENSMUSG00000027649.15	Ctnnbl1	cKO_vs_wt	-0.083178	0.442292	-0.097712	0.999978	-0.0186878	0.99997	139.224	259.646	131.091	245.349
ENSMUSG00000029673.17	Auts2	cKO_vs_wt	0.0781171	0.559831	-0.0440992	0.999978	-0.125172	0.99997	138.72	102.548	146.378	100.734
ENSMUSG00000053110.13	Yap1	cKO_vs_wt	-0.0810596	0.288477	0.0287565	0.999978	0.106479	0.99997	138.261	193.413	130.56	200.331
ENSMUSG00000063480.8	Snu13	cKO_vs_wt	-0.0625895	0.581396	1.32728	0.999978	1.38671	0.191029	130.766	4.26546	125.012	10.9439
ENSMUSG00000041815.14	Poldip3	cKO_vs_wt	-0.0937009	0.192429	-0.0522071	0.999978	0.0383208	0.99997	138.237	285.432	129.316	278.269
ENSMUSG00000026095.15	Asnsd1	cKO_vs_wt	0.216366	2.78617e-05	0.0389669	0.999978	-0.182519	0.832427	138.772	24.239	161.065	25.1629
ENSMUSG00000038095.15	Sbno1	cKO_vs_wt	0.0494018	0.719129	-0.0778261	0.999978	-0.131527	0.957276	138.58	104.968	143.242	100.425
ENSMUSG00000030268.17	Bcat1	cKO_vs_wt	-0.0594752	0.599973	-0.0204511	0.999978	0.0348826	0.99997	138.783	224.339	132.923	223.705
ENSMUSG00000028991.15	Mtor	cKO_vs_wt	-0.0071397	0.967748	0.0351582	0.999978	0.0383576	0.99997	138.613	113.888	137.812	118.611
ENSMUSG00000022186.14	Oxct1	cKO_vs_wt	-0.000352503	0.998481	-0.00989453	0.999978	-0.0128629	0.99997	138.407	173.115	138.159	173.697
ENSMUSG00000040325.16	Dcaf1	cKO_vs_wt	-0.0454452	0.640726	0.00513425	0.999978	0.0460466	0.99997	138.348	147.034	133.9	149.114
ENSMUSG00000074102.4	Rbm15b	cKO_vs_wt	-0.08062	0.521609	0.0191549	0.999978	0.0947061	0.99997	138.321	66.8097	130.659	68.5997
ENSMUSG00000030061.16	Uba3	cKO_vs_wt	0.0174092	0.912565	-0.0086575	0.999978	-0.0302107	0.99997	138.273	133.929	139.672	134.436
ENSMUSG00000022263.10	Trio	cKO_vs_wt	-0.0181936	0.954791	-0.115824	0.999978	-0.101699	0.99997	137.377	97.0682	135.53	90.5279
ENSMUSG00000028044.6	Cks1b	cKO_vs_wt	-0.0906988	0.580504	0.00659162	0.999978	0.0944423	0.99997	138.225	101.306	129.564	103.378
ENSMUSG00000001910.5	Nacc1	cKO_vs_wt	-0.0452922	0.779439	0.136254	0.999978	0.177271	0.849461	137.045	67.4461	132.7	74.959
ENSMUSG00000052534.15	Pbx1	cKO_vs_wt	0.119246	0.16896	0.0134717	0.999978	-0.110913	0.99997	138.017	174.372	149.689	178.295
ENSMUSG00000041570.14	Camsap2	cKO_vs_wt	0.0236063	0.911944	0.0043747	0.999978	-0.0245612	0.99997	138.041	74.7396	140.136	75.6858
ENSMUSG00000045624.15	Esf1	cKO_vs_wt	0.0609202	0.692827	-0.096872	0.999978	-0.162231	0.99997	137.829	135.936	143.476	128.362
ENSMUSG00000042502.10	Cd2bp2	cKO_vs_wt	-0.0742441	0.354432	-0.190989	0.999978	-0.120982	0.99997	138.089	165.458	130.987	146.184
ENSMUSG00000030319.8	Cand2	cKO_vs_wt	0.0754801	0.5284	-0.0395292	0.999978	-0.119054	0.99997	137.801	328.181	144.886	324.306
ENSMUSG00000031246.14	Sh3bgrl	cKO_vs_wt	-0.091484	0.289201	0.0599048	0.999978	0.1483	0.99997	137.993	286.462	129.349	301.125
ENSMUSG00000047213.14	Ythdf3	cKO_vs_wt	-0.0134661	0.946702	-0.0543763	0.999978	-0.0443084	0.99997	137.639	179.207	136.052	173.856
ENSMUSG00000027239.14	Mdk	cKO_vs_wt	-0.0765207	0.881355	-0.047542	0.999978	0.0279123	0.99997	137.731	220.677	130.309	216.113
ENSMUSG00000031691.14	Tnpo2	cKO_vs_wt	-0.124131	0.0314586	0.0507327	0.999978	0.170236	0.808877	137.433	150.67	125.895	158.142
ENSMUSG00000044308.17	Ubr3	cKO_vs_wt	0.0330404	0.801857	-0.0177779	0.999978	-0.0549033	0.99997	137.614	119.805	140.599	119.735
ENSMUSG00000001761.7	Smo	cKO_vs_wt	0.106698	0.150534	-0.0536387	0.999978	-0.165228	0.99997	137.639	9.02966	147.981	8.83811
ENSMUSG00000022945.12	Chaf1b	cKO_vs_wt	-0.0123269	0.945766	-0.0636838	0.999978	-0.0553523	0.99997	136.672	183.25	135.276	177.672
ENSMUSG00000058325.6	Dock1	cKO_vs_wt	0.0181897	0.910604	-0.0142019	0.999978	-0.0355708	0.99997	137.349	95.1699	138.865	95.2048
ENSMUSG00000032312.7	Csk	cKO_vs_wt	0.0224416	0.885943	-0.103865	0.999978	-0.131263	0.886412	136.985	99.7401	138.983	93.9369
ENSMUSG00000038848.14	Ythdf1	cKO_vs_wt	0.00306073	0.983699	0.0335367	0.999978	0.0258894	0.99997	137.206	138.686	137.267	143.445
ENSMUSG00000042426.6	Dhx29	cKO_vs_wt	0.0167845	0.914905	-0.0410767	0.999978	-0.0626387	0.99997	136.965	118.486	138.394	116.541
ENSMUSG00000037029.8	Zfp146	cKO_vs_wt	-0.07401	0.355368	0.0197384	0.999978	0.0949222	0.99997	136.911	35.17	129.913	36.022
ENSMUSG00000026509.15	Capn2	cKO_vs_wt	-0.0727032	0.503924	-0.0827893	0.999978	-0.0126249	0.99997	136.715	179.606	129.784	171.327
ENSMUSG00000060475.13	Wtap	cKO_vs_wt	0.00413332	0.977206	0.0245359	0.999978	0.0129977	0.99997	129.826	63.2794	129.963	65.3023
ENSMUSG00000029465.14	Arpc3	cKO_vs_wt	0.0641755	0.620748	0.0423669	0.999978	-0.0258368	0.99997	136.764	291.767	142.797	304.836
ENSMUSG00000026374.14	Tsn	cKO_vs_wt	-0.0683678	0.428216	-0.0106064	0.999978	0.0537619	0.99997	136.392	320.092	129.858	320.684
ENSMUSG00000028675.12	Pnrc2	cKO_vs_wt	-0.0192146	0.911944	0.0349397	0.999978	0.0504987	0.99997	136.505	186.478	134.552	192.919
ENSMUSG00000057110.15	Cntrl	cKO_vs_wt	-0.0581683	0.514234	-0.0078084	0.999978	0.0490429	0.99997	136.393	58.573	130.822	58.7317
ENSMUSG00000015143.15	Actn1	cKO_vs_wt	-0.0251653	0.853238	-0.0708197	0.999978	-0.0494308	0.99997	136.494	215.789	133.881	208.3
ENSMUSG00000067148.15	Polr1c	cKO_vs_wt	-0.139125	0.112674	-0.0902916	0.999978	0.0438506	0.99997	136.461	257.454	123.575	244.588
ENSMUSG00000028729.15	Ebna1bp2	cKO_vs_wt	-0.0174034	0.938114	0.031297	0.999978	0.0449338	0.99997	136.442	150.273	134.552	155.769
ENSMUSG00000039068.16	Zzz3	cKO_vs_wt	0.0510994	0.653076	-0.0118914	0.999978	-0.0710295	0.99997	136.196	45.2736	140.985	45.6549
ENSMUSG00000056305.4	Usp39	cKO_vs_wt	0.050752	0.640468	-0.0185512	0.999978	-0.0738697	0.99997	136.266	181.662	140.864	181.622
ENSMUSG00000025571.13	Tnrc6c	cKO_vs_wt	0.0360297	0.813185	-0.0290377	0.999978	-0.0715105	0.99997	136.121	53.0925	139.369	52.6527
ENSMUSG00000027160.16	Ccdc34	cKO_vs_wt	-0.0209182	0.904361	0.0115733	0.999978	0.0288018	0.99997	135.578	146.114	133.394	149.259
ENSMUSG00000035198.9	Tubg1	cKO_vs_wt	-0.0176234	0.921808	-0.0321868	0.999978	-0.0180201	0.99997	134.809	189.278	132.971	187.766
ENSMUSG00000010517.7	Faf1	cKO_vs_wt	0.085788	0.309382	-0.061393	0.999978	-0.150563	0.913093	135.925	146.938	143.994	142.108
ENSMUSG00000024812.11	Tjp2	cKO_vs_wt	0.0605877	0.546412	-0.0737344	0.999978	-0.13734	0.935695	135.864	136.897	141.503	131.407
ENSMUSG00000021115.15	Vrk1	cKO_vs_wt	-0.0117524	0.940434	0.0140238	0.999978	0.0213027	0.99997	135.525	199.35	134.141	203.292
ENSMUSG00000037993.8	Dhx38	cKO_vs_wt	-0.0834027	0.411457	-0.0741077	0.999978	0.0062893	0.99997	135.599	114.189	127.831	109.54
ENSMUSG00000024260.14	Sap130	cKO_vs_wt	-0.0567842	0.643937	-0.145261	0.999978	-0.0922464	0.99997	135.554	69.8075	130.129	64.0009
ENSMUSG00000059981.12	Taok2	cKO_vs_wt	-0.0345288	0.778384	0.00308748	0.999978	0.0329296	0.99997	135.624	71.9406	132.175	72.8996
ENSMUSG00000003099.11	Ppp5c	cKO_vs_wt	-0.0369662	0.828028	0.0232734	0.999978	0.05715	0.99997	135.643	144.398	132.002	148.95
ENSMUSG00000039748.11	Exo1	cKO_vs_wt	0.0229062	0.853113	0.000978441	0.999978	-0.025359	0.99997	135.459	110.554	137.386	111.602
ENSMUSG00000071655.12	Ubxn1	cKO_vs_wt	0.0768325	0.292916	-0.0573068	0.999978	-0.13745	0.958845	135.342	294.909	142.465	287.361
ENSMUSG00000038143.16	Stox2	cKO_vs_wt	-0.0113581	0.966338	0.112258	0.999978	0.116164	0.99997	135.205	35.2484	133.891	38.7247
ENSMUSG00000006273.14	Atp6v1b2	cKO_vs_wt	0.232922	0.000107064	0.00370877	0.999978	-0.233877	0.459164	135.191	265.267	158.621	268.782
ENSMUSG00000054115.11	Skp2	cKO_vs_wt	-0.0962601	0.321765	-0.00567969	0.999978	0.0866688	0.99997	135.241	260.555	126.306	262.116
ENSMUSG00000017264.16	Exosc10	cKO_vs_wt	-0.0955787	0.12533	0.0513916	0.999978	0.142672	0.945209	135.047	134.056	126.226	140.707
ENSMUSG00000025395.14	Prim1	cKO_vs_wt	0.0463439	0.710122	-0.00299422	0.999978	-0.0536661	0.99997	134.994	151.461	139.157	152.893
ENSMUSG00000033904.16	Ccp110	cKO_vs_wt	-0.104614	0.222339	0.0196278	0.999978	0.117976	0.99997	134.89	58.4623	125.245	60.0138
ENSMUSG00000025246.13	Tbl1x	cKO_vs_wt	0.00599261	0.968309	-0.0196194	0.999978	-0.0303644	0.99997	134.893	126.204	135.28	125.579
ENSMUSG00000022377.16	Asap1	cKO_vs_wt	-0.0315655	0.803202	-0.0314365	0.999978	-0.00507457	0.99997	134.599	69.2652	131.479	68.8536
ENSMUSG00000055932.15	Fto	cKO_vs_wt	-0.0631952	0.521527	-0.0346879	0.999978	0.0239401	0.99997	134.646	187.899	128.714	185.563
ENSMUSG00000039804.15	Ncoa5	cKO_vs_wt	0.118735	0.00395058	-0.0305875	0.999978	-0.152486	0.890648	134.626	236.319	145.978	233.81
ENSMUSG00000040054.16	Baz2a	cKO_vs_wt	-0.0538077	0.658034	0.021244	0.999978	0.068972	0.99997	134.405	67.8241	129.367	69.8324
ENSMUSG00000056770.15	Setd3	cKO_vs_wt	0.0612112	0.467098	-0.476995	0.999978	-0.54311	0.00221964	133.403	12.9749	138.963	9.40335
ENSMUSG00000022682.8	Rrn3	cKO_vs_wt	0.08949	0.328858	0.123809	0.999978	0.0301575	0.99997	134.407	228.243	142.787	251.788
ENSMUSG00000028884.14	Rpa2	cKO_vs_wt	-0.0349023	0.824588	-0.118994	0.999978	-0.0885872	0.99997	134.43	239.72	130.958	222.967
ENSMUSG00000020476.14	Dbnl	cKO_vs_wt	0.034674	0.80202	-0.115238	0.999978	-0.154395	0.933258	134.209	197.896	137.194	185.576
ENSMUSG00000032330.7	Cox7a2	cKO_vs_wt	-0.114801	0.485571	0.0583932	0.999978	0.168398	0.99997	133.099	183.177	122.71	192.947
ENSMUSG00000109511.1	Nup62	cKO_vs_wt	-0.125507	0.157259	0.0462255	0.999978	0.167869	0.780245	134.179	135.158	122.863	141.411
ENSMUSG00000017210.14	Med24	cKO_vs_wt	-0.0746655	0.512191	0.00588031	0.999978	0.0764292	0.99997	134.055	112.843	127.096	115.114
ENSMUSG00000028249.15	Sdcbp	cKO_vs_wt	-0.0262184	0.819443	0.00616536	0.999978	0.0280061	0.99997	133.801	312.419	131.129	317.592
ENSMUSG00000019803.11	Nr2e1	cKO_vs_wt	0.0563959	0.764606	-0.0094619	0.999978	-0.0710208	0.99997	133.343	138.266	138.466	138.978
ENSMUSG00000079487.11	Med12	cKO_vs_wt	-0.0549109	0.585312	-0.0599251	0.999978	-0.00764174	0.99997	133.778	133.183	128.566	129.239
ENSMUSG00000024795.11	Kif20b	cKO_vs_wt	-0.0459615	0.773907	-0.146489	0.999978	-0.102695	0.99997	133.468	101.668	129.008	92.6871
ENSMUSG00000027852.14	Nras	cKO_vs_wt	-0.0869386	0.39528	-0.0198781	0.999978	0.0627247	0.99997	133.576	126.81	125.658	126.227
ENSMUSG00000109865.1	Hspa14	cKO_vs_wt	-0.0447276	0.801462	-0.0871924	0.999978	-0.0465747	0.99997	133.572	160.812	129.312	153.238
ENSMUSG00000025423.16	Pias2	cKO_vs_wt	-0.0301632	0.832913	0.0688521	0.999978	0.0945703	0.99997	133.502	62.6746	130.556	66.3635
ENSMUSG00000061436.15	Hipk2	cKO_vs_wt	0.0811573	0.869421	0.0358626	0.999978	-0.049437	0.99997	133.579	52.0496	141.053	54.2871
ENSMUSG00000037474.13	Dtl	cKO_vs_wt	-0.0836576	0.199912	-0.0292907	0.999978	0.0493106	0.99997	133.4	173.405	125.653	171.629
ENSMUSG00000018433.14	Nol11	cKO_vs_wt	0.0236798	0.865024	-0.00673584	0.999978	-0.0330672	0.99997	133.391	205.26	135.335	206.411
ENSMUSG00000028233.6	Tgs1	cKO_vs_wt	0.0237098	0.888102	0.00621306	0.999978	-0.0217139	0.99997	133.418	109.398	135.411	110.853
ENSMUSG00000034648.9	Lrrn1	cKO_vs_wt	0.377284	0.34737	0.0493077	0.999978	-0.329566	0.99997	133.48	80.7227	173.251	84.4939
ENSMUSG00000029146.14	Snx17	cKO_vs_wt	-0.123713	0.0594524	0.0307217	0.999978	0.1494	0.808877	133.104	132.392	121.966	137.258
ENSMUSG00000027254.13	Map1a	cKO_vs_wt	-0.0714147	0.722979	-0.0326599	0.999978	0.0349132	0.99997	133.174	78.8949	126.664	78.3747
ENSMUSG00000037791.15	Phf12	cKO_vs_wt	-0.035526	0.7335	-0.0308451	0.999978	-0.00155971	0.99997	133.112	51.9178	129.721	51.4618
ENSMUSG00000003345.16	Csnk1g2	cKO_vs_wt	-0.0245013	0.886261	0.0873411	0.999978	0.102989	0.99997	133.125	26.7598	130.638	28.9856
ENSMUSG00000049550.17	Clip1	cKO_vs_wt	0.066456	0.595597	0.063544	0.999978	-0.00821507	0.99997	132.978	100.651	139.007	106.228
ENSMUSG00000028053.13	Ash1l	cKO_vs_wt	-0.0487417	0.837074	-0.0776217	0.999978	-0.0354175	0.99997	132.843	59.3611	128.273	56.7635
ENSMUSG00000022680.14	Pdxdc1	cKO_vs_wt	0.0356944	0.792234	-0.0236576	0.999978	-0.0640865	0.99997	132.861	125.079	135.904	124.427
ENSMUSG00000025204.10	Ndufb8	cKO_vs_wt	0.0295686	0.883047	0.135357	0.999978	0.102197	0.99997	132.984	289.373	135.525	322.307
ENSMUSG00000015087.14	Rabl6	cKO_vs_wt	-0.0563121	0.605413	0.00692963	0.999978	0.0568668	0.99997	132.829	51.906	127.591	52.9077
ENSMUSG00000034290.9	Nek9	cKO_vs_wt	0.0407476	0.784141	0.109723	0.999978	0.0638687	0.99997	132.765	105.731	136.317	115.625
ENSMUSG00000027326.13	Knl1	cKO_vs_wt	0.0460847	0.788058	-0.00552227	0.999978	-0.0541499	0.99997	132.575	96.1154	136.593	96.6602
ENSMUSG00000062234.14	Gak	cKO_vs_wt	-0.0160482	0.907366	0.0477934	0.999978	0.0585254	0.99997	132.593	78.1615	130.867	81.7615
ENSMUSG00000028416.12	Bag1	cKO_vs_wt	0.0959108	0.42775	0.0769575	0.999978	-0.0271907	0.99997	132.656	42.4009	141.566	45.5579
ENSMUSG00000038241.16	Cep250	cKO_vs_wt	-0.0604382	0.575635	-0.0493936	0.999978	0.00671113	0.99997	132.498	66.4394	126.845	64.8322
ENSMUSG00000039536.16	Stau1	cKO_vs_wt	-0.0178409	0.881355	-0.070783	0.999978	-0.0557589	0.99997	132.217	147.359	130.429	141.619
ENSMUSG00000068267.5	Cenpb	cKO_vs_wt	0.153551	0.0823414	0.106883	0.999978	-0.0545059	0.99997	132.369	44.6806	147.068	48.8438
ENSMUSG00000001150.7	Mcm3ap	cKO_vs_wt	-0.0466139	0.709093	-0.0833916	0.999978	-0.0394796	0.99997	132.127	80.4914	127.856	76.6013
ENSMUSG00000075232.5	Amd1	cKO_vs_wt	0.0398034	0.794069	1.66618	0.999978	1.62018	0.886412	109.154	0.0878492	111.985	0.285352
ENSMUSG00000026043.18	Col3a1	cKO_vs_wt	-0.386869	0.650722	-0.284791	0.999978	0.0997102	0.99997	132.133	137.161	100.739	114.229
ENSMUSG00000040459.11	Arglu1	cKO_vs_wt	-0.0304006	0.882364	-0.101758	0.999978	-0.0763839	0.99997	132.112	267.897	128.978	252.694
ENSMUSG00000022142.8	Nup155	cKO_vs_wt	-0.112139	0.208394	-0.0420325	0.999978	0.0662684	0.99997	132.093	256.184	122.029	251.275
ENSMUSG00000036822.6	Topors	cKO_vs_wt	0.0771836	0.431022	-0.0362279	0.999978	-0.11584	0.99997	131.916	97.3005	138.957	95.6762
ENSMUSG00000032368.14	Zic1	cKO_vs_wt	0.104219	0.650722	0.108286	0.999978	-0.00157011	0.99997	131.872	135.152	141.53	147.729
ENSMUSG00000029467.15	Atp2a2	cKO_vs_wt	-0.0680229	0.792634	-0.0652052	0.999978	0.00111889	0.99997	131.728	95.6507	125.471	92.3464
ENSMUSG00000047459.14	Dynlrb1	cKO_vs_wt	-0.0930177	0.58281	-0.00640089	0.999978	0.0828327	0.99997	131.656	88.8679	123.159	89.4965
ENSMUSG00000019124.10	Scrn1	cKO_vs_wt	-0.00336623	0.987164	-0.026672	0.999978	-0.0288594	0.99997	131.382	235.538	130.845	233.511
ENSMUSG00000036980.13	Taf6	cKO_vs_wt	-0.0941086	0.294854	-0.0578528	0.999978	0.0306899	0.99997	131.236	69.3302	122.866	67.5581
ENSMUSG00000037275.14	Gemin5	cKO_vs_wt	0.0229999	0.886261	0.0872174	0.999978	0.0600808	0.99997	131.115	117.089	133.045	126.066
ENSMUSG00000040648.14	Ppip5k2	cKO_vs_wt	0.039527	0.711491	0.0816554	0.999978	0.0402738	0.99997	131.046	71.5225	134.545	76.3213
ENSMUSG00000021676.10	Iqgap2	cKO_vs_wt	-0.00586129	0.981335	-0.0697563	0.999978	-0.0674757	0.99997	130.96	132.13	130.334	127.491
ENSMUSG00000008604.11	Ubqln4	cKO_vs_wt	0.00650455	0.97424	0.0463455	0.999978	0.0367389	0.99997	130.691	163.732	131.027	172.01
ENSMUSG00000022463.8	Srebf2	cKO_vs_wt	0.00533204	0.983856	-0.100059	0.999978	-0.108825	0.99997	130.965	58.7002	131.192	55.3454
ENSMUSG00000018572.10	Phf23	cKO_vs_wt	-0.00677327	0.964109	-0.0235139	0.999978	-0.0209918	0.99997	130.935	128.35	130.084	127.878
ENSMUSG00000029599.13	Ddx54	cKO_vs_wt	0.186561	0.00565202	-0.112636	0.999978	-0.303714	0.0531283	130.762	148.732	148.51	139.187
ENSMUSG00000020954.16	Strn3	cKO_vs_wt	0.0764873	0.564017	-0.0531128	0.999978	-0.133279	0.99997	130.527	110.48	137.431	107.454
ENSMUSG00000002968.9	Med25	cKO_vs_wt	0.233355	0.000877747	0.020614	0.999978	-0.21849	0.89252	130.336	128.844	152.909	132.847
ENSMUSG00000030986.13	Dhx32	cKO_vs_wt	-0.0401375	0.78832	0.0303203	0.999978	0.0667481	0.99997	130.357	135.835	126.586	139.962
ENSMUSG00000021143.10	Pacs2	cKO_vs_wt	-0.0147793	0.945766	0.0497873	0.999978	0.0590667	0.99997	130.196	51.4517	128.797	54.1057
ENSMUSG00000021816.11	Ppp3cb	cKO_vs_wt	0.0442771	0.738902	0.0544258	0.999978	0.00566781	0.99997	130.18	114.729	134.006	120.421
ENSMUSG00000023883.13	Phf10	cKO_vs_wt	0.086112	0.41481	-0.0775778	0.999978	-0.166972	0.808877	130.067	67.5217	137.858	64.7841
ENSMUSG00000037032.16	Apbb1	cKO_vs_wt	-0.0725773	0.328858	-0.0461152	0.999978	0.0221312	0.99997	129.702	111.024	123.249	108.787
ENSMUSG00000032872.16	Cyb5r4	cKO_vs_wt	0.069701	0.649777	-0.129947	0.999978	-0.204438	0.990749	128.144	11.4185	134.259	10.5349
ENSMUSG00000025474.9	Tubgcp2	cKO_vs_wt	-0.0413331	0.748914	0.0451471	0.999978	0.0827785	0.99997	129.749	133.908	125.845	139.704
ENSMUSG00000022897.15	Dyrk1a	cKO_vs_wt	-0.0382875	0.777655	-0.040998	0.999978	-0.00637062	0.99997	129.717	111.144	126.197	108.872
ENSMUSG00000032512.7	Wdr48	cKO_vs_wt	-0.0396792	0.730911	-0.0260625	0.999978	0.00800404	0.99997	129.798	141.752	125.973	141.196
ENSMUSG00000011114.18	Tbrg1	cKO_vs_wt	0.0263568	0.898865	-0.0170367	0.999978	-0.0487497	0.99997	129.775	185.598	131.873	185.64
ENSMUSG00000029148.15	Nrbp1	cKO_vs_wt	-0.0545584	0.66789	-0.0267014	0.999978	0.0242322	0.99997	129.708	213.244	124.613	212.257
ENSMUSG00000033166.11	Dis3	cKO_vs_wt	0.0274016	0.860608	-0.0145173	0.999978	-0.0449414	0.99997	129.479	167.038	131.697	167.329
ENSMUSG00000002372.9	Ranbp3	cKO_vs_wt	-0.0343845	0.829586	-0.0670734	0.999978	-0.0371817	0.99997	129.681	184.279	126.468	178.329
ENSMUSG00000020897.12	Aurkb	cKO_vs_wt	-0.0289109	0.857415	-0.0892923	0.999978	-0.0647432	0.99997	129.485	269.986	126.7	256.819
ENSMUSG00000016252.7	Atp5e	cKO_vs_wt	-0.138867	0.33227	0.12651	0.999978	0.261278	0.588362	129.47	345.205	117.346	381.4
ENSMUSG00000035455.12	Fignl1	cKO_vs_wt	-0.0324867	0.854095	-0.00710488	0.999978	0.0211029	0.99997	129.366	226.542	126.33	227.521
ENSMUSG00000027881.14	Prpf38b	cKO_vs_wt	-0.0116841	0.946702	-0.04166	0.999978	-0.0335012	0.99997	129.181	147.995	127.85	145.574
ENSMUSG00000037570.16	Mcrs1	cKO_vs_wt	-0.0693432	0.553093	-0.0444133	0.999978	0.0152056	0.99997	128.737	9.5467	122.527	9.39051
ENSMUSG00000026987.16	Baz2b	cKO_vs_wt	-0.0940588	0.401109	-0.140469	0.999978	-0.0497533	0.99997	129.042	83.4659	120.66	76.3896
ENSMUSG00000031231.4	Cox7b	cKO_vs_wt	-0.0757887	0.675936	0.0842087	0.999978	0.155723	0.962834	129.04	207.763	122.185	223.377
ENSMUSG00000053453.9	Thoc7	cKO_vs_wt	0.0175511	0.934297	0.0546956	0.999978	0.03326	0.99997	128.882	190.361	130.146	199.881
ENSMUSG00000022983.16	Scaf4	cKO_vs_wt	0.041108	0.635069	-0.0176295	0.999978	-0.0623159	0.99997	128.377	95.4935	131.858	95.4743
ENSMUSG00000022407.10	Adsl	cKO_vs_wt	-0.0623175	0.594106	0.101201	0.999978	0.15897	0.842753	128.43	199.776	122.774	216.881
ENSMUSG00000071337.11	Tia1	cKO_vs_wt	-0.0510263	0.652729	-0.0558834	0.999978	-0.00822349	0.99997	128.283	115.239	123.57	111.898
ENSMUSG00000003119.14	Cdk12	cKO_vs_wt	0.0144685	0.952059	-0.0969044	0.999978	-0.116137	0.99997	128.219	87.2063	129.312	82.4512
ENSMUSG00000063800.5	Prpf38a	cKO_vs_wt	0.0126482	0.925786	-0.0121543	0.999978	-0.0279098	0.99997	127.911	140.521	128.804	140.695
ENSMUSG00000020307.15	Cdc34	cKO_vs_wt	0.066313	0.519967	-0.0538848	0.999978	-0.125665	0.99997	127.138	77.6125	132.981	75.8717
ENSMUSG00000033059.7	Pygb	cKO_vs_wt	-0.0174725	0.887538	-0.0949787	0.999978	-0.0808471	0.99997	128.231	195.212	126.551	184.986
ENSMUSG00000049327.17	Kmt5a	cKO_vs_wt	0.00772325	0.960983	-0.0142763	0.999978	-0.0258903	0.99997	128.153	36.7097	128.598	36.6937
ENSMUSG00000039682.12	Lap3	cKO_vs_wt	0.0126263	0.942977	-0.0163069	0.999978	-0.0323852	0.99997	128.251	167.25	129.152	167.416
ENSMUSG00000022770.17	Dlg1	cKO_vs_wt	0.0901506	0.399478	-0.19048	0.999978	-0.284118	0.0743593	127.859	83.5551	135.928	74.0517
ENSMUSG00000040097.16	Flywch1	cKO_vs_wt	0.0252078	0.872815	-0.0189982	0.999978	-0.0477678	0.99997	128.218	111.557	130.401	111.267
ENSMUSG00000031066.10	Usp11	cKO_vs_wt	-0.00905615	0.949371	0.0322866	0.999978	0.0367163	0.99997	128.193	172.667	127.318	178.542
ENSMUSG00000041560.12	Nop53	cKO_vs_wt	0.44213	1.30424e-13	-0.126286	0.999978	-0.57343	4.80958e-05	128.121	143.782	173.737	133.231
ENSMUSG00000020315.18	Sptbn1	cKO_vs_wt	-0.157217	0.337783	-0.103723	0.999978	0.0494017	0.99997	127.863	155.173	114.539	145.897
ENSMUSG00000058076.12	Sdhc	cKO_vs_wt	-0.0714058	0.451294	-0.0334086	0.999978	0.0344282	0.99997	127.768	351.958	121.476	348.369
ENSMUSG00000021794.16	Glud1	cKO_vs_wt	-0.00040281	0.998102	-0.0432742	0.999978	-0.0456489	0.99997	127.746	104.018	127.561	101.724
ENSMUSG00000028576.12	Ift74	cKO_vs_wt	0.0432876	0.775156	0.0465155	0.999978	-0.00216567	0.99997	127.779	150.673	131.338	157.112
ENSMUSG00000034484.8	Snx2	cKO_vs_wt	-0.000189236	0.998741	-0.0226326	0.999978	-0.0290274	0.99997	127.506	100.649	127.223	100.617
ENSMUSG00000036882.7	Arhgap33	cKO_vs_wt	0.0885723	0.500372	0.148898	0.999978	0.053224	0.99997	126.95	27.5001	134.783	31.0478
ENSMUSG00000034621.14	Gpatch8	cKO_vs_wt	-0.0799678	0.42129	-0.124217	0.999978	-0.0472134	0.99997	127.557	93.4792	120.565	86.6596
ENSMUSG00000036781.13	Rps27l	cKO_vs_wt	-0.0878312	0.651544	0.155123	0.999978	0.239633	0.780245	127.535	181.409	119.823	204.882
ENSMUSG00000038279.10	Nop2	cKO_vs_wt	-0.0325945	0.797465	-0.0740448	0.999978	-0.0443027	0.99997	127.36	143.176	124.324	137.529
ENSMUSG00000020899.16	Pfas	cKO_vs_wt	-0.0700881	0.376948	-0.0186368	0.999978	0.0476535	0.99997	127.224	200.131	121.017	199.792
ENSMUSG00000038379.15	Ttk	cKO_vs_wt	-0.10165	0.144258	-0.0477685	0.999978	0.0535286	0.99997	126.955	98.6305	118.106	96.2337
ENSMUSG00000005575.16	Ube2m	cKO_vs_wt	0.0261254	0.864596	0.0193659	0.999978	-0.00964441	0.99997	126.926	188.146	129.049	193.932
ENSMUSG00000026516.8	Nvl	cKO_vs_wt	-0.0356476	0.737589	-0.0109303	0.999978	0.0216678	0.99997	126.645	156.832	123.423	157.254
ENSMUSG00000063884.6	Ptcd3	cKO_vs_wt	0.0605267	0.589512	0.0334063	0.999978	-0.0307558	0.99997	126.533	135.39	131.689	139.851
ENSMUSG00000033065.14	Pfkm	cKO_vs_wt	-0.0300036	0.799787	-0.038252	0.999978	-0.0128101	0.99997	126.767	170.609	124.011	168.405
ENSMUSG00000031729.6	Ist1	cKO_vs_wt	-0.105765	0.27248	-0.0564623	0.999978	0.0454137	0.99997	126.824	207.791	117.704	201.755
ENSMUSG00000006169.19	Clint1	cKO_vs_wt	-0.0288141	0.817872	-0.0246849	0.999978	0.000980363	0.99997	126.788	212.672	124.049	211.227
ENSMUSG00000038467.15	Chmp4b	cKO_vs_wt	0.168074	0.000372238	-0.0681072	0.999978	-0.240819	0.207273	126.818	262.061	142.259	253.164
ENSMUSG00000073079.6	Srp54a	cKO_vs_wt	0.00346769	0.993066	-0.63509	0.999978	-0.643578	0.99997	6.37582	0.0276602	6.39249	0
ENSMUSG00000049606.16	Zfp644	cKO_vs_wt	0.00321145	0.987065	-0.0626103	0.999978	-0.0707876	0.99997	126.608	98.6743	126.733	95.406
ENSMUSG00000019907.10	Ppp1r12a	cKO_vs_wt	0.0201294	0.902272	-0.0195713	0.999978	-0.0442182	0.99997	126.485	152.413	127.98	151.929
ENSMUSG00000024290.9	Rock1	cKO_vs_wt	0.0148493	0.940945	-0.0739725	0.999978	-0.0910641	0.99997	126.541	75.9075	127.576	72.723
ENSMUSG00000016382.15	Pls3	cKO_vs_wt	-0.0117802	0.950614	-0.067496	0.999978	-0.060733	0.99997	126.574	189.289	125.243	182.507
ENSMUSG00000042625.16	Safb2	cKO_vs_wt	0.16887	9.59719e-05	-0.0200143	0.999978	-0.195996	0.532738	117.445	112.508	131.754	112.683
ENSMUSG00000079562.7	Maea	cKO_vs_wt	-0.118097	0.104557	0.0651802	0.999978	0.179436	0.689676	126.591	224.195	116.571	237.916
ENSMUSG00000001052.15	Sec24b	cKO_vs_wt	-0.0451766	0.706852	-0.0144956	0.999978	0.0266915	0.99997	126.391	106.734	122.371	107.121
ENSMUSG00000037174.18	Elf2	cKO_vs_wt	0.00999226	0.955171	-0.0416333	0.999978	-0.0560348	0.99997	126.082	91.4157	126.806	90.1278
ENSMUSG00000021182.16	Ccdc88c	cKO_vs_wt	0.0174127	0.912565	-0.081768	0.999978	-0.103416	0.99997	126.27	102.039	127.582	97.4642
ENSMUSG00000041936.18	Agrn	cKO_vs_wt	-0.0099448	0.976837	-0.0300919	0.999978	-0.0217794	0.99997	126.235	60.8195	125.108	60.2576
ENSMUSG00000041028.16	Ghitm	cKO_vs_wt	-0.0840127	0.425861	0.0378856	0.999978	0.117819	0.99997	126.09	225.135	118.679	233.645
ENSMUSG00000017716.15	Birc5	cKO_vs_wt	-0.0745838	0.462814	0.065941	0.999978	0.137887	0.99997	126.082	182.85	119.536	194.31
ENSMUSG00000020986.13	Sec23a	cKO_vs_wt	0.00197296	0.987466	0.00248599	0.999978	-0.00322098	0.99997	125.894	129.026	125.915	130.539
ENSMUSG00000034543.15	Morc2a	cKO_vs_wt	-0.0678453	0.45235	-0.115818	0.999978	-0.0502247	0.99997	125.704	123.287	119.724	114.98
ENSMUSG00000022247.12	Brix1	cKO_vs_wt	-0.0395709	0.802913	-0.0149582	0.999978	0.0209331	0.99997	125.686	208.709	121.995	208.333
ENSMUSG00000027030.15	Stk39	cKO_vs_wt	0.0883618	0.318147	-0.124726	0.999978	-0.217324	0.194685	125.495	135.099	133.119	125.257
ENSMUSG00000021589.13	Rhobtb3	cKO_vs_wt	-0.000486175	0.997759	0.0291127	0.999978	0.0244496	0.99997	125.627	90.5412	125.504	93.5533
ENSMUSG00000092541.7	Gm20537	cKO_vs_wt	-0.0102329	0.955016	-0.0891602	0.999978	-0.0835806	0.99997	125.622	139.426	124.436	133.07
ENSMUSG00000021824.13	Ap3m1	cKO_vs_wt	0.0490348	0.70582	-0.0361354	0.999978	-0.0898978	0.99997	121.957	44.0526	125.994	43.3679
ENSMUSG00000024212.9	Mllt1	cKO_vs_wt	0.0843121	0.350969	0.0652234	0.999978	-0.0237394	0.99997	125.302	114.569	132.696	121.472
ENSMUSG00000021748.9	Pdhb	cKO_vs_wt	0.0228895	0.876771	0.0618111	0.999978	0.0361261	0.99997	125.289	103.555	127.015	108.836
ENSMUSG00000022881.15	Rfc4	cKO_vs_wt	-0.0123439	0.959239	-0.0404233	0.999978	-0.0330484	0.99997	125.45	207.383	124.087	203.836
ENSMUSG00000002221.11	Paxip1	cKO_vs_wt	-0.0679325	0.498765	-0.0127352	0.999978	0.0495904	0.99997	125.318	44.4562	119.385	44.747
ENSMUSG00000029203.16	Ube2k	cKO_vs_wt	-0.0412516	0.684501	0.0846325	0.999978	0.122197	0.93921	125.112	204.809	121.358	219.915
ENSMUSG00000000399.10	Ndufa9	cKO_vs_wt	-0.0724058	0.499382	-0.0416073	0.999978	0.0263757	0.99997	125.231	220.982	118.9	216.643
ENSMUSG00000099913.1	Gm28551	cKO_vs_wt	0.202656	0.000130232	0.0718858	0.999978	-0.134539	0.99997	125.023	20.3891	143.734	21.5782
ENSMUSG00000016528.10	Mapkapk2	cKO_vs_wt	0.0363352	0.781327	-0.0892787	0.999978	-0.129983	0.948314	125.161	125.666	128.21	119.682
ENSMUSG00000042750.7	Bex2	cKO_vs_wt	0.04402	0.703787	0.0328556	0.999978	-0.0165787	0.99997	124.695	300.509	128.304	311.112
ENSMUSG00000055639.16	Dach1	cKO_vs_wt	-0.0341586	0.898993	0.0544312	0.999978	0.0849517	0.99997	124.79	253.088	121.551	266.624
ENSMUSG00000037242.8	Clic4	cKO_vs_wt	-0.0462448	0.645998	0.0548775	0.999978	0.0961365	0.99997	124.896	319.059	120.718	334.805
ENSMUSG00000041264.16	Uspl1	cKO_vs_wt	-0.0886911	0.404291	0.194214	0.999978	0.277536	0.544409	124.782	47.9713	117.146	55.4122
ENSMUSG00000020950.10	Foxg1	cKO_vs_wt	0.594119	1.84679e-05	0.0121859	0.999978	-0.584638	0.0120336	124.781	232.139	188.006	237.323
ENSMUSG00000018042.18	Cyb5r3	cKO_vs_wt	-0.100926	0.268418	-0.0429165	0.999978	0.0537053	0.99997	124.715	251.937	116.16	247.924
ENSMUSG00000016619.10	Nup50	cKO_vs_wt	-0.0662948	0.306845	-0.0154378	0.999978	0.0483576	0.99997	124.572	146.976	118.751	146.806
ENSMUSG00000032525.15	Nktr	cKO_vs_wt	0.0165793	0.935783	-0.195552	0.999978	-0.215326	0.69616	124.266	52.1177	125.477	46.1398
ENSMUSG00000021076.6	Actr10	cKO_vs_wt	0.0128667	0.934122	-0.0222164	0.999978	-0.0395522	0.99997	124.571	182.995	125.444	182.012
ENSMUSG00000025278.9	Flnb	cKO_vs_wt	-0.184351	0.192733	-0.270916	0.999978	-0.0906564	0.99997	124.436	171.959	109.199	144.358
ENSMUSG00000026843.15	Fubp3	cKO_vs_wt	0.0544529	0.69423	-0.117754	0.999978	-0.176596	0.779825	124.36	155.405	128.941	145.084
ENSMUSG00000041438.8	Utp4	cKO_vs_wt	-0.0166555	0.925685	-0.0188176	0.999978	-0.00536146	0.99997	123.65	119.366	121.947	118.871
ENSMUSG00000026558.13	Uck2	cKO_vs_wt	0.0170252	0.897264	0.0194236	0.999978	-0.00216439	0.99997	124.039	215.998	125.289	222.393
ENSMUSG00000021681.8	Aggf1	cKO_vs_wt	-0.0501919	0.623449	-0.106794	0.999978	-0.0646823	0.99997	123.894	40.7025	119.503	38.3736
ENSMUSG00000020808.3	Pimreg	cKO_vs_wt	-0.114283	0.238484	-0.0872288	0.999978	0.0222225	0.99997	123.672	157.701	114.094	150.761
ENSMUSG00000062937.7	Mtap	cKO_vs_wt	0.0477314	0.733504	0.022137	0.999978	-0.0297842	0.99997	123.756	184.318	127.643	189.297
ENSMUSG00000036606.17	Plxnb2	cKO_vs_wt	-0.170698	0.703787	-0.0469994	0.999978	0.120734	0.99997	123.683	55.2968	109.601	54.0431
ENSMUSG00000022378.14	Fam49b	cKO_vs_wt	0.0503144	0.684693	-0.0159935	0.999978	-0.069029	0.99997	123.144	93.0114	127.277	92.7246
ENSMUSG00000039220.16	Ppp1r10	cKO_vs_wt	0.00464796	0.983606	0.02546	0.999978	0.0160967	0.99997	123.421	88.7167	123.794	91.2533
ENSMUSG00000078671.11	Chd2	cKO_vs_wt	-0.0862652	0.534515	-0.085005	0.999978	-0.00307877	0.99997	123.347	65.5362	115.99	62.3775
ENSMUSG00000028869.13	Gnl2	cKO_vs_wt	0.00970203	0.960864	-0.0681388	0.999978	-0.0803559	0.99997	123.525	148.923	124.097	143.561
ENSMUSG00000037876.17	Jmjd1c	cKO_vs_wt	-0.0100996	0.964382	-0.029732	0.999978	-0.0240095	0.99997	123.434	66.7901	122.447	65.8921
ENSMUSG00000001964.14	Emd	cKO_vs_wt	-0.00889726	0.960864	-0.0200917	0.999978	-0.0148919	0.99997	123.235	210.554	122.284	210.502
ENSMUSG00000048000.15	Gigyf2	cKO_vs_wt	-0.0917706	0.217684	-0.0659961	0.999978	0.0235088	0.99997	123.047	103.663	115.204	100.025
ENSMUSG00000026254.17	Eif4e2	cKO_vs_wt	-0.0434613	0.732368	0.00865942	0.999978	0.0472459	0.99997	123.377	143.049	119.465	146.133
ENSMUSG00000025255.18	Zfhx4	cKO_vs_wt	-0.180483	0.58612	-0.216067	0.999978	-0.0405054	0.99997	123.364	69.3355	108.756	60.4841
ENSMUSG00000020257.13	Wdr82	cKO_vs_wt	-0.0188159	0.885943	-0.0825507	0.999978	-0.0688712	0.99997	122.928	293.858	121.139	280.092
ENSMUSG00000041236.8	Vps41	cKO_vs_wt	0.0146657	0.924625	-0.0424757	0.999978	-0.0621188	0.99997	123.217	103.539	124.213	101.566
ENSMUSG00000025326.12	Ube3a	cKO_vs_wt	0.046958	0.783155	-0.0540936	0.999978	-0.105263	0.99997	122.997	182.564	126.82	177.273
ENSMUSG00000058070.14	Eml1	cKO_vs_wt	-0.0218788	0.874199	0.032558	0.999978	0.0482394	0.99997	123.149	108.56	121.057	112.383
ENSMUSG00000051329.13	Nup160	cKO_vs_wt	0.00237334	0.987164	-0.0553949	0.999978	-0.0606346	0.99997	123.016	179.284	123.086	174.141
ENSMUSG00000021938.12	Pspc1	cKO_vs_wt	0.0196797	0.89327	-0.00372138	0.999978	-0.0272132	0.99997	123.167	357.39	124.636	360.443
ENSMUSG00000033014.12	Trim33	cKO_vs_wt	-0.00323328	0.98704	-0.0288424	0.999978	-0.0296177	0.99997	123.016	147.945	122.589	146.672
ENSMUSG00000024287.8	Thoc1	cKO_vs_wt	0.0137169	0.946702	0.0342993	0.999978	0.0168075	0.99997	122.805	115.766	123.745	119.779
ENSMUSG00000046572.10	Zfp518b	cKO_vs_wt	-0.0259025	0.876771	-0.130364	0.999978	-0.10915	0.99997	122.897	93.5492	120.619	86.2443
ENSMUSG00000017999.16	Ddx27	cKO_vs_wt	0.0202804	0.889149	-0.0135615	0.999978	-0.0380103	0.99997	122.756	110.238	124.224	110.672
ENSMUSG00000015745.9	Plekho1	cKO_vs_wt	0.0640411	0.548578	-0.0693661	0.999978	-0.138825	0.962834	122.715	71.1898	128.113	68.7303
ENSMUSG00000036270.16	Edc4	cKO_vs_wt	-0.069262	0.478626	-0.0337731	0.999978	0.0316494	0.99997	122.65	143.498	116.719	142.163
ENSMUSG00000027714.11	Exosc9	cKO_vs_wt	0.0128107	0.942437	-0.0910272	0.999978	-0.107098	0.99997	122.398	219.613	123.262	207.839
ENSMUSG00000061360.8	Phf5a	cKO_vs_wt	-0.0677689	0.59515	-0.0786447	0.999978	-0.0140661	0.99997	122.519	126.48	116.778	121.262
ENSMUSG00000042487.6	Leo1	cKO_vs_wt	-0.00118818	0.99533	-0.00168049	0.999978	-0.00468234	0.99997	122.565	186.054	122.142	188.527
ENSMUSG00000038335.13	Tsr1	cKO_vs_wt	-0.00765389	0.964075	-0.073918	0.999978	-0.0684647	0.99997	122.436	122.538	121.535	117.445
ENSMUSG00000003269.17	Cyth2	cKO_vs_wt	-0.0431115	0.750813	-0.0262262	0.999978	0.012695	0.99997	122.41	139.43	118.633	138.839
ENSMUSG00000015748.13	Prpf3	cKO_vs_wt	-0.149269	0.229897	-0.1617	0.999978	-0.016941	0.99997	121.964	106.439	109.698	95.9736
ENSMUSG00000026260.12	Ndufa10	cKO_vs_wt	0.114246	0.0628318	-0.0661772	0.999978	-0.184022	0.503275	122.125	189.023	132.059	182.529
ENSMUSG00000017861.11	Mybl2	cKO_vs_wt	-0.00533847	0.9752	-0.0272309	0.999978	-0.0262744	0.99997	117.834	57.9982	117.211	57.7853
ENSMUSG00000020697.16	Lig3	cKO_vs_wt	0.0197081	0.910521	0.0151942	0.999978	-0.00867103	0.99997	121.963	111.368	123.524	113.558
ENSMUSG00000038084.16	Opa1	cKO_vs_wt	0.0416883	0.748914	0.0434534	0.999978	-0.00354388	0.99997	121.738	127.752	125.088	133.038
ENSMUSG00000030726.16	Pold3	cKO_vs_wt	-0.0535808	0.605413	0.046134	0.999978	0.0957405	0.99997	121.887	78.4473	117.196	81.783
ENSMUSG00000070697.4	Utp3	cKO_vs_wt	0.179306	0.00127708	-0.179375	0.999978	-0.362366	0.0221776	121.909	191.575	137.763	170.758
ENSMUSG00000037361.8	Sf3b6	cKO_vs_wt	0.0220226	0.925786	0.0247001	0.999978	-0.000337482	0.99997	121.965	192.143	123.57	197.019
ENSMUSG00000030204.10	Ddx47	cKO_vs_wt	-0.0611214	0.500372	-0.0376983	0.999978	0.0202149	0.99997	121.618	197.575	116.319	194.529
ENSMUSG00000038299.16	Wdr36	cKO_vs_wt	0.0973528	0.160784	-0.00809642	0.999978	-0.109089	0.99997	121.664	147.531	129.936	148.538
ENSMUSG00000030619.9	Eed	cKO_vs_wt	0.0793448	0.465709	0.00168976	0.999978	-0.0815894	0.99997	121.684	90.1652	128.256	91.0434
ENSMUSG00000060657.8	Marf1	cKO_vs_wt	-0.101791	0.300664	0.00703278	0.999978	0.102199	0.99997	121.484	46.3692	113.114	47.1838
ENSMUSG00000033392.16	Clasp2	cKO_vs_wt	0.0499389	0.745112	0.0211818	0.999978	-0.033343	0.99997	121.149	94.8671	125.317	97.3285
ENSMUSG00000000142.15	Axin2	cKO_vs_wt	0.00482064	0.987303	0.0487789	0.999978	0.0398997	0.99997	121.18	63.6673	121.424	66.8853
ENSMUSG00000025234.11	Arih1	cKO_vs_wt	0.0357084	0.801768	-0.0694497	0.999978	-0.109069	0.993447	120.952	168.133	123.842	161.939
ENSMUSG00000024976.14	Shoc2	cKO_vs_wt	0.0148712	0.949942	0.120157	0.999978	0.101238	0.99997	120.782	106.093	121.786	116.765
ENSMUSG00000049878.13	Rlf	cKO_vs_wt	-0.0670771	0.518596	0.00321417	0.999978	0.0657762	0.99997	120.994	85.4401	115.309	86.7668
ENSMUSG00000020022.17	Ndufa12	cKO_vs_wt	-0.00376268	0.987466	0.0692112	0.999978	0.0658826	0.99997	119.808	27.8838	119.215	29.7765
ENSMUSG00000028478.18	Clta	cKO_vs_wt	0.214322	0.000971725	-0.0739156	0.999978	-0.292013	0.228582	120.788	302.464	139.833	291.705
ENSMUSG00000027248.13	Pdia3	cKO_vs_wt	-0.0847275	0.911944	-0.0699276	0.999978	0.0122131	0.99997	120.717	168.719	113.529	162.266
ENSMUSG00000029701.15	Rbm28	cKO_vs_wt	0.0733297	0.484883	-0.0557685	0.999978	-0.132515	0.99997	120.379	127.949	126.363	124.203
ENSMUSG00000037725.8	Ckap2	cKO_vs_wt	0.0369454	0.844292	-0.0568251	0.999978	-0.0972538	0.99997	120.611	127.548	123.51	123.748
ENSMUSG00000057388.9	Mrpl18	cKO_vs_wt	-0.0258448	0.885835	-0.00347577	0.999978	0.0165042	0.99997	120.506	35.9566	118.102	36.5677
ENSMUSG00000040250.14	Ints13	cKO_vs_wt	0.00413243	0.976753	-0.181717	0.999978	-0.190376	0.595926	120.384	82.4409	120.536	73.3973
ENSMUSG00000035941.15	Ibtk	cKO_vs_wt	0.0266556	0.872815	0.150041	0.999978	0.119733	0.99997	118.84	38.323	120.957	42.8737
ENSMUSG00000041773.8	Enc1	cKO_vs_wt	-0.0688448	0.649777	0.0165014	0.999978	0.0810233	0.99997	120.381	183.911	114.64	187.928
ENSMUSG00000011877.13	Git1	cKO_vs_wt	0.107407	0.192733	-0.0322376	0.999978	-0.144813	0.874918	120.351	64.9207	129.467	64.2739
ENSMUSG00000032621.8	Srek1	cKO_vs_wt	-0.0279285	0.859098	-0.0294031	0.999978	-0.00515561	0.99997	120.188	119.399	117.58	118.386
ENSMUSG00000028771.13	Ptpn12	cKO_vs_wt	-0.000681796	0.996821	0.0859405	0.999978	0.0820044	0.99997	120.312	91.9352	120.085	98.5732
ENSMUSG00000025995.16	Wdr75	cKO_vs_wt	-0.00157741	0.993022	-0.0120433	0.999978	-0.0141436	0.99997	120.254	122.051	119.877	122.131
ENSMUSG00000041642.18	Kif21b	cKO_vs_wt	0.0197199	0.950192	0.00426796	0.999978	-0.0216483	0.99997	119.637	72.7391	121.236	73.9526
ENSMUSG00000033257.14	Ttll4	cKO_vs_wt	-0.126269	0.165962	-0.0453765	0.999978	0.0763305	0.99997	120.278	92.7298	110.151	90.7085
ENSMUSG00000001767.5	Crnkl1	cKO_vs_wt	-0.00701013	0.971847	-0.12432	0.999978	-0.121201	0.99997	120.038	156.367	119.215	144.869
ENSMUSG00000038056.15	Kmt2c	cKO_vs_wt	0.0325271	0.945766	-0.0673668	0.999978	-0.106004	0.99997	119.98	53.9162	122.44	52.1747
ENSMUSG00000006456.10	Rbm14	cKO_vs_wt	0.193957	0.000297623	-0.0161755	0.999978	-0.214065	0.471	119.817	213.88	136.806	214.242
ENSMUSG00000022771.17	Ppil2	cKO_vs_wt	0.000865629	0.995998	0.0184456	0.999978	0.0136036	0.99997	119.608	98.4815	119.44	100.834
ENSMUSG00000039230.14	Tbcd	cKO_vs_wt	-0.0272599	0.840735	-0.0736005	0.999978	-0.0503113	0.99997	119.646	116.156	117.182	111.814
ENSMUSG00000040688.16	Tbl3	cKO_vs_wt	-0.0299966	0.837074	-0.0183811	0.999978	0.00813067	0.99997	119.673	184.458	117.059	184.478
ENSMUSG00000032867.8	Fbxw8	cKO_vs_wt	-0.0590759	0.631476	0.0157817	0.999978	0.0708753	0.99997	119.624	177.581	114.615	181.689
ENSMUSG00000002658.9	Gtf2f1	cKO_vs_wt	-0.0260736	0.881355	-0.196577	0.999978	-0.172307	0.972519	119.449	114.535	117.098	101.197
ENSMUSG00000028603.15	Scp2	cKO_vs_wt	-0.0408751	0.673501	0.156702	0.999978	0.195772	0.595926	116.839	33.6702	113.423	37.9357
ENSMUSG00000000346.9	Dazap2	cKO_vs_wt	-0.0657032	0.521973	-0.0789289	0.999978	-0.0195109	0.99997	119.166	41.4128	113.625	39.7992
ENSMUSG00000035623.14	Rsf1	cKO_vs_wt	0.0306445	0.832913	-0.0241594	0.999978	-0.059663	0.99997	119.017	136.419	121.342	135.933
ENSMUSG00000006276.10	Eps15l1	cKO_vs_wt	-0.00943683	0.959239	-0.0161323	0.999978	-0.0113776	0.99997	118.97	106.839	118.038	107.295
ENSMUSG00000026669.14	Mcm10	cKO_vs_wt	-0.0714109	0.483694	-0.0542235	0.999978	0.0125549	0.99997	119.045	121.95	113.107	118.698
ENSMUSG00000024491.16	Rbm27	cKO_vs_wt	0.0638332	0.58612	-0.0613354	0.999978	-0.130863	0.988307	118.829	91.0794	123.952	88.269
ENSMUSG00000029577.13	Ube3b	cKO_vs_wt	-0.0266849	0.88417	0.00775137	0.999978	0.027385	0.99997	118.795	34.994	116.496	35.7781
ENSMUSG00000027014.14	Cwc22	cKO_vs_wt	0.0198194	0.912976	0.0524037	0.999978	0.0304484	0.99997	118.327	36.01	119.72	37.6784
ENSMUSG00000026064.16	Ptp4a1	cKO_vs_wt	0.00164362	0.99264	-0.25037	0.999978	-0.255169	0.99997	91.0811	0.0650514	91.0403	0.0430826
ENSMUSG00000071528.4	Atp5md	cKO_vs_wt	-0.0208897	0.946702	0.04311	0.999978	0.0597329	0.99997	118.378	77.9015	116.474	81.2979
ENSMUSG00000051579.10	Tceal8	cKO_vs_wt	0.049156	0.603733	0.0657287	0.999978	0.0117208	0.99997	118.517	213.554	122.357	226.611
ENSMUSG00000052738.14	Suclg1	cKO_vs_wt	0.0118321	0.945766	0.000447584	0.999978	-0.0159897	0.99997	118.598	203.573	119.35	205.906
ENSMUSG00000024429.9	Gnl1	cKO_vs_wt	-0.0197276	0.906934	-0.0755819	0.999978	-0.0612033	0.99997	118.526	88.0096	116.81	85.0075
ENSMUSG00000027406.12	Idh3b	cKO_vs_wt	-0.0117495	0.941689	0.0154714	0.999978	0.0233544	0.99997	118.453	193.347	117.256	197.299
ENSMUSG00000022477.13	Aco2	cKO_vs_wt	-0.0999175	0.537622	-0.0158852	0.999978	0.080853	0.99997	118.203	93.7785	110.161	93.8168
ENSMUSG00000049295.17	Zfp219	cKO_vs_wt	0.419255	3.74742e-06	-0.00373638	0.999978	-0.429044	0.0756713	118.357	100.622	157.867	101.949
ENSMUSG00000022774.13	Ncbp2	cKO_vs_wt	-0.0408108	0.763388	-0.0728742	0.999978	-0.0358497	0.99997	118.271	264.781	114.726	255.109
ENSMUSG00000026923.15	Notch1	cKO_vs_wt	-0.202486	0.12056	-0.0726117	0.999978	0.128079	0.99997	118.089	67.7349	102.429	65.0388
ENSMUSG00000063576.12	Klhdc3	cKO_vs_wt	0.0437778	0.667951	0.0853791	0.999978	0.0361597	0.99997	118.096	46.9454	121.563	50.4681
ENSMUSG00000027331.15	Knstrn	cKO_vs_wt	0.158111	0.00596125	0.00476374	0.999978	-0.158811	0.92838	117.709	168.007	131.09	170.646
ENSMUSG00000001229.9	Dpp9	cKO_vs_wt	-0.0732333	0.497629	-0.0571967	0.999978	0.0114032	0.99997	118.021	76.8194	112.006	74.7656
ENSMUSG00000031601.16	Cnot7	cKO_vs_wt	0.0702498	0.642103	0.201867	0.999978	0.127762	0.99997	117.907	41.6916	123.606	48.6275
ENSMUSG00000031683.16	Lsm6	cKO_vs_wt	-0.0773701	0.404291	0.175818	0.999978	0.248999	0.767242	117.994	33.9957	111.643	38.8304
ENSMUSG00000020124.10	Usp15	cKO_vs_wt	0.0262542	0.862218	0.00332795	0.999978	-0.0255421	0.99997	117.967	116.476	119.936	117.839
ENSMUSG00000030816.8	Rnf40	cKO_vs_wt	0.0368197	0.727316	-0.0922764	0.999978	-0.133483	0.915015	117.94	100.612	120.74	95.4992
ENSMUSG00000039000.8	Ube3c	cKO_vs_wt	-0.034828	0.78832	0.0611312	0.999978	0.0900223	0.99997	117.818	56.8046	114.891	59.9518
ENSMUSG00000025555.14	Farp1	cKO_vs_wt	-0.048638	0.788496	-0.032785	0.999978	0.0130952	0.99997	117.867	76.771	113.878	75.9782
ENSMUSG00000001785.13	Pwp1	cKO_vs_wt	-0.0241435	0.88653	-0.112079	0.999978	-0.0908719	0.99997	117.793	201.552	115.612	188.332
ENSMUSG00000006307.16	Kmt2b	cKO_vs_wt	0.00185667	0.993871	-0.124036	0.999978	-0.133045	0.99997	117.677	40.1933	117.603	37.5423
ENSMUSG00000017781.17	Pitpna	cKO_vs_wt	0.0325776	0.810167	-0.0282466	0.999978	-0.06508	0.99997	117.652	184.06	120.218	182.075
ENSMUSG00000020982.9	Nemf	cKO_vs_wt	-0.00318652	0.987164	-0.0616666	0.999978	-0.0627317	0.99997	117.219	102.738	116.691	99.3782
ENSMUSG00000061689.15	Dlgap4	cKO_vs_wt	-0.00350305	0.983699	-0.0530424	0.999978	-0.0561657	0.99997	117.399	87.9175	117.015	86.1479
ENSMUSG00000032898.9	Fbxo21	cKO_vs_wt	-0.056116	0.673069	0.00300711	0.999978	0.0560962	0.99997	117.546	209.498	112.92	212.748
ENSMUSG00000024833.15	Pola2	cKO_vs_wt	0.03974	0.805783	-0.0605387	0.999978	-0.104409	0.99997	117.162	201.697	120.171	195.415
ENSMUSG00000026926.14	Pmpca	cKO_vs_wt	-0.0864006	0.16784	0.0149823	0.999978	0.0970252	0.99997	116.989	228.058	110.081	232.743
ENSMUSG00000024742.15	Fen1	cKO_vs_wt	-0.054581	0.622082	-0.0657611	0.999978	-0.0156305	0.99997	117.048	185.263	112.445	179.103
ENSMUSG00000052305.6	Hbb-bs	cKO_vs_wt	0.0618063	0.954703	0.224754	0.999978	0.149387	0.99997	58.0662	1.08102	60.3642	1.32908
ENSMUSG00000022322.8	Shcbp1	cKO_vs_wt	0.0273975	0.831159	-0.0296345	0.999978	-0.0611825	0.99997	116.894	158.091	118.93	156.311
ENSMUSG00000024083.16	Pja2	cKO_vs_wt	-0.0336952	0.822069	-0.16268	0.999978	-0.133457	0.96363	116.777	161.117	113.972	145.295
ENSMUSG00000030846.15	Tial1	cKO_vs_wt	0.0814771	0.308529	-0.0925066	0.999978	-0.179095	0.228363	116.811	123.924	123.37	117.541
ENSMUSG00000042211.7	Fbxo38	cKO_vs_wt	-0.0291751	0.854095	-0.102296	0.999978	-0.0751511	0.99997	116.537	83.0907	114.017	78.0595
ENSMUSG00000057133.14	Chd6	cKO_vs_wt	-0.14061	0.311527	-0.167222	0.999978	-0.0324033	0.99997	116.58	41.8918	105.548	37.7399
ENSMUSG00000028568.16	Btf3l4	cKO_vs_wt	-0.0228113	0.905803	0.657402	0.999978	0.683582	0.99997	101.289	0.187955	99.5254	0.291753
ENSMUSG00000030774.13	Pak1	cKO_vs_wt	0.0645407	0.457362	-0.0338824	0.999978	-0.10205	0.99997	116.147	109.856	121.345	108.202
ENSMUSG00000048922.18	Cdca2	cKO_vs_wt	-0.0512068	0.609541	-0.0269259	0.999978	0.0218511	0.99997	116.55	101.774	112.273	100.95
ENSMUSG00000079614.4	Seh1l	cKO_vs_wt	0.0105125	0.951127	-0.0216423	0.999978	-0.0357169	0.99997	116.592	203.55	117.276	202.516
ENSMUSG00000061130.13	Ppm1b	cKO_vs_wt	0.0169968	0.910277	0.0223912	0.999978	0.00261445	0.99997	112.293	32.0439	113.474	32.7712
ENSMUSG00000030180.15	Kdm5a	cKO_vs_wt	0.00449591	0.984425	-0.00632951	0.999978	-0.0158393	0.99997	116.485	91.0049	116.735	91.5349
ENSMUSG00000002844.9	Adprh	cKO_vs_wt	0.088936	0.279623	-0.171871	0.999978	-0.265858	0.00221393	116.448	193.065	123.662	173.478
ENSMUSG00000025035.9	Arl3	cKO_vs_wt	0.0391271	0.776254	0.0125789	0.999978	-0.030304	0.99997	116.313	165.783	119.288	169.496
ENSMUSG00000037640.15	Zfp60	cKO_vs_wt	-0.0105034	0.964109	0.00277081	0.999978	0.00883702	0.99997	116.187	84.5345	115.255	85.3912
ENSMUSG00000069171.14	Nr2f1	cKO_vs_wt	-0.00307854	0.99264	-0.0718653	0.999978	-0.0710181	0.99997	116.327	138.68	115.987	134.079
ENSMUSG00000029267.17	Mtf2	cKO_vs_wt	0.034115	0.800825	0.0833084	0.999978	0.044064	0.99997	115.361	82.4823	117.922	88.4987
ENSMUSG00000004937.6	Sgta	cKO_vs_wt	-0.131253	0.132195	0.0350892	0.999978	0.162767	0.934876	116.209	229.067	105.908	237.926
ENSMUSG00000045598.10	Zfp553	cKO_vs_wt	0.0619535	0.533569	-0.0656044	0.999978	-0.133372	0.96363	116.175	70.1582	121.018	67.842
ENSMUSG00000056234.15	Ncoa4	cKO_vs_wt	0.01685	0.936021	-0.0994313	0.999978	-0.101309	0.99997	95.4992	3.35155	96.5711	3.14341
ENSMUSG00000010376.15	Nedd8	cKO_vs_wt	-0.110641	0.395345	-0.0567318	0.999978	0.0510764	0.99997	115.946	373.953	107.229	363.401
ENSMUSG00000032446.14	Eomes	cKO_vs_wt	-0.0756943	0.783155	-0.148869	0.999978	-0.0761025	0.99997	115.954	106.051	109.68	97.2358
ENSMUSG00000063810.7	Alms1	cKO_vs_wt	0.00608293	0.978275	-0.041773	0.999978	-0.0521404	0.99997	106.132	63.6675	106.401	62.3261
ENSMUSG00000091896.8	Ube2d2a	cKO_vs_wt	0.0857435	0.353725	0.512292	0.999978	0.423267	0.99997	108.993	0.149747	115.577	0.211724
ENSMUSG00000034152.6	Exoc3	cKO_vs_wt	-0.0294145	0.821891	0.0661809	0.999978	0.0921815	0.99997	115.599	162.934	113.142	172.312
ENSMUSG00000004895.9	Prcc	cKO_vs_wt	0.0629637	0.538905	-0.0153256	0.999978	-0.0840732	0.99997	115.691	112.268	120.605	112.649
ENSMUSG00000033444.14	Specc1l	cKO_vs_wt	0.00526093	0.978384	-0.0616857	0.999978	-0.0714614	0.99997	115.324	108.663	115.669	105.168
ENSMUSG00000006715.11	Gmnn	cKO_vs_wt	-0.0710455	0.595597	-0.0457635	0.999978	0.0210058	0.99997	115.63	237.334	109.79	231.918
ENSMUSG00000032314.14	Etfa	cKO_vs_wt	0.0455678	0.733504	-0.0168039	0.999978	-0.0663576	0.99997	115.452	147.668	118.955	146.99
ENSMUSG00000035437.15	Rabgap1	cKO_vs_wt	0.0257108	0.870495	0.0209055	0.999978	-0.00813808	0.99997	115.057	128.917	116.951	132.33
ENSMUSG00000039231.18	Suv39h1	cKO_vs_wt	-0.0315102	0.791192	0.0108449	0.999978	0.0376159	0.99997	115.005	104.233	112.333	106.358
ENSMUSG00000002319.16	Ipo4	cKO_vs_wt	-0.00659596	0.973959	-0.0156633	0.999978	-0.0131543	0.99997	114.895	149.658	114.239	150.064
ENSMUSG00000015961.8	Adss	cKO_vs_wt	0.206505	9.71711e-05	-0.0402589	0.999978	-0.2507	0.365423	114.961	223.895	132.435	219.639
ENSMUSG00000021366.8	Hivep1	cKO_vs_wt	0.0627212	0.748006	-0.0239544	0.999978	-0.0911462	0.99997	114.757	14.654	119.739	14.5087
ENSMUSG00000014601.13	Strip1	cKO_vs_wt	-0.0393631	0.737952	0.071375	0.999978	0.106201	0.989186	114.854	146.501	111.655	155.577
ENSMUSG00000037519.17	Ppfia1	cKO_vs_wt	0.0315307	0.78995	-0.0903059	0.999978	-0.124828	0.934876	114.577	93.8546	116.989	88.9136
ENSMUSG00000024091.9	Vapa	cKO_vs_wt	0.0808048	0.371278	-0.0479819	0.999978	-0.134443	0.900383	113.434	308.622	119.672	301.759
ENSMUSG00000039756.12	Dnttip2	cKO_vs_wt	0.0725594	0.502748	0.0490944	0.999978	-0.0279138	0.99997	114.616	134.183	120.234	140.202
ENSMUSG00000022051.15	Bnip3l	cKO_vs_wt	-0.0272928	0.854095	0.0418544	0.999978	0.0502003	0.99997	111.951	6.71953	109.594	7.05035
ENSMUSG00000020580.10	Rock2	cKO_vs_wt	0.00514448	0.982153	-0.012257	0.999978	-0.0221313	0.99997	114.578	81.5973	114.723	81.6522
ENSMUSG00000000838.17	Fmr1	cKO_vs_wt	0.0536737	0.650722	-0.0337232	0.999978	-0.0893805	0.99997	114.61	110.687	118.737	108.966
ENSMUSG00000045333.15	Zfp423	cKO_vs_wt	0.112976	0.271968	-0.0131632	0.999978	-0.132416	0.999078	114.215	73.1451	123.446	73.3943
ENSMUSG00000009090.17	Ap1b1	cKO_vs_wt	-0.0229035	0.867985	0.0588755	0.999978	0.0777149	0.99997	114.535	197.284	112.568	208.292
ENSMUSG00000078974.10	Sec61g	cKO_vs_wt	-0.128765	0.463241	0.179778	0.999978	0.302139	0.999078	109.038	4.48168	99.4982	5.2026
ENSMUSG00000000628.10	Hk2	cKO_vs_wt	-0.0487573	0.783155	-0.132398	0.999978	-0.088197	0.99997	113.711	218.162	109.711	201.196
ENSMUSG00000031093.14	Dock11	cKO_vs_wt	0.0311175	0.868088	-0.173189	0.999978	-0.207555	0.866805	113.727	82.543	115.99	73.837
ENSMUSG00000050017.11	Pitpnb	cKO_vs_wt	-0.04184	0.780853	-0.00626927	0.999978	0.0314117	0.99997	113.685	238.977	110.254	240.236
ENSMUSG00000031839.7	Hsbp1	cKO_vs_wt	-0.0973319	0.43776	0.147695	0.999978	0.241783	0.520758	113.728	292.798	106.151	328.989
ENSMUSG00000036678.8	Aaas	cKO_vs_wt	0.00257822	0.987466	-0.0790976	0.999978	-0.0859718	0.99997	113.629	138.48	113.669	132.819
ENSMUSG00000034832.15	Tet3	cKO_vs_wt	0.0682047	0.738242	-0.0753935	0.999978	-0.148246	0.99997	113.568	64.5144	118.91	62.1097
ENSMUSG00000019854.17	Reps1	cKO_vs_wt	0.0941029	0.407754	-0.0185734	0.999978	-0.116523	0.99997	113.336	70.2074	120.909	70.1872
ENSMUSG00000001151.10	Pcnt	cKO_vs_wt	-0.0304554	0.923112	-0.0981464	0.999978	-0.0729145	0.99997	113.468	68.2443	110.893	64.5547
ENSMUSG00000033475.15	Tomm6	cKO_vs_wt	-0.128009	0.317742	0.00423165	0.999978	0.128445	0.99997	113.505	288.923	103.64	293.36
ENSMUSG00000000561.14	Wdr77	cKO_vs_wt	0.0146974	0.93282	0.0582641	0.999978	0.039455	0.99997	113.299	172.111	114.303	181.177
ENSMUSG00000036990.13	Otud4	cKO_vs_wt	0.0591265	0.684693	0.0373176	0.999978	-0.0265452	0.99997	113.301	91.9785	117.852	95.5062
ENSMUSG00000112449.1	Srp54b	cKO_vs_wt	-0.129345	0.698215	NA	NA	0.0663991	0.99997	4.08544	0	3.73183	0
ENSMUSG00000004665.10	Cnn2	cKO_vs_wt	-0.121501	0.762982	-0.0841792	0.999978	0.0344958	0.99997	113.227	212.056	103.938	203.195
ENSMUSG00000017146.12	Brca1	cKO_vs_wt	-0.0585122	0.577725	-0.126421	0.999978	-0.0704431	0.99997	113.148	78.2781	108.576	72.3858
ENSMUSG00000027598.16	Itch	cKO_vs_wt	-0.0321369	0.858565	-0.0596407	0.999978	-0.0321297	0.99997	113.016	91.6961	110.409	88.9037
ENSMUSG00000018481.9	Appbp2	cKO_vs_wt	-0.00461213	0.975447	0.0112883	0.999978	0.011109	0.99997	113.09	159.646	112.543	162.87
ENSMUSG00000051166.10	Eml5	cKO_vs_wt	0.0543186	0.854396	-0.0603532	0.999978	-0.118923	0.99997	112.866	31.4471	116.905	30.581
ENSMUSG00000078515.4	Ddi2	cKO_vs_wt	0.014354	0.948495	-0.0541684	0.999978	-0.0726267	0.99997	112.897	94.5352	113.953	92.1176
ENSMUSG00000026275.13	Ppp1r7	cKO_vs_wt	-0.0185037	0.908178	0.0440023	0.999978	0.059142	0.99997	112.998	317.804	111.283	330.919
ENSMUSG00000025609.15	Mkln1	cKO_vs_wt	0.0635857	0.498765	-0.00430407	0.999978	-0.0705874	0.99997	112.964	196.18	117.882	197.424
ENSMUSG00000027323.10	Rad51	cKO_vs_wt	0.042488	0.726991	0.0514628	0.999978	0.00546754	0.99997	112.981	125.155	116.157	131.11
ENSMUSG00000035027.18	Map2k2	cKO_vs_wt	0.0478934	0.748914	-0.0111252	0.999978	-0.0638025	0.99997	112.939	141.332	116.666	142.395
ENSMUSG00000005899.14	Smpd4	cKO_vs_wt	-0.093136	0.318726	-0.0326052	0.999978	0.0559794	0.99997	112.642	74.434	105.438	73.669
ENSMUSG00000108815.1	Gm49388	cKO_vs_wt	-0.0608694	0.471908	-0.0209443	0.999978	0.0391271	0.99997	112.726	54.4106	107.921	53.9768
ENSMUSG00000031827.13	Cotl1	cKO_vs_wt	0.0106521	0.960037	-0.0142355	0.999978	-0.0276394	0.99997	112.105	243.386	112.725	244.695
ENSMUSG00000019338.13	Zfp687	cKO_vs_wt	-0.0785622	0.431721	-0.0893907	0.999978	-0.0171976	0.99997	112.568	62.9407	106.37	60.1017
ENSMUSG00000019843.14	Fyn	cKO_vs_wt	-0.0349258	0.828028	-0.0230278	0.999978	0.00770977	0.99997	112.108	77.2451	109.335	76.753
ENSMUSG00000027363.15	Usp8	cKO_vs_wt	0.0171938	0.901844	-0.0412639	0.999978	-0.0604069	0.99997	112.534	63.355	113.679	61.9867
ENSMUSG00000021810.3	Ecd	cKO_vs_wt	0.0454404	0.731555	-0.0574751	0.999978	-0.106845	0.99997	112.448	130.181	115.836	126.187
ENSMUSG00000036097.8	Slf2	cKO_vs_wt	0.0490229	0.70582	0.0479434	0.999978	-0.00480957	0.99997	112.386	56.8735	116.129	59.1617
ENSMUSG00000029407.10	Uso1	cKO_vs_wt	-0.0259179	0.883484	-0.0457025	0.999978	-0.0219819	0.99997	112.218	132.376	110.129	129.447
ENSMUSG00000030811.14	Fbxl19	cKO_vs_wt	0.183954	0.0171097	-0.0662158	0.999978	-0.25616	0.351726	112.132	46.0903	127.283	44.6492
ENSMUSG00000039473.8	Ubn1	cKO_vs_wt	-0.0852737	0.300723	-0.00369406	0.999978	0.0779729	0.99997	112.25	46.4915	105.704	46.6511
ENSMUSG00000016831.12	Tox4	cKO_vs_wt	-0.0749476	0.417745	0.0893291	0.999978	0.159619	0.774081	112.227	59.9898	106.322	64.617
ENSMUSG00000025272.16	Tro	cKO_vs_wt	-0.102722	0.231991	-0.0776305	0.999978	0.0214242	0.99997	109.643	48.8153	101.994	46.7642
ENSMUSG00000030872.14	Gga2	cKO_vs_wt	-0.0164255	0.902184	0.0229638	0.999978	0.0357835	0.99997	112.11	144.18	110.732	148.286
ENSMUSG00000022551.8	Cyc1	cKO_vs_wt	0.0103898	0.958574	-0.0132238	0.999978	-0.0294419	0.99997	111.793	188.219	112.384	189.143
ENSMUSG00000005981.11	Trap1	cKO_vs_wt	-0.0413355	0.746246	-0.0619731	0.999978	-0.0240269	0.99997	111.778	140.172	108.412	135.713
ENSMUSG00000043411.15	Usp48	cKO_vs_wt	0.000753357	0.996338	-0.0128856	0.999978	-0.0166597	0.99997	111.783	107.644	111.635	107.805
ENSMUSG00000025626.16	Phf6	cKO_vs_wt	-0.0102927	0.960425	-0.0539901	0.999978	-0.0473651	0.99997	111.57	224.336	110.52	217.939
ENSMUSG00000015709.9	Arnt2	cKO_vs_wt	0.0254411	0.889724	0.0445614	0.999978	0.0134325	0.99997	111.297	126.731	113.215	132.39
ENSMUSG00000028032.13	Papss1	cKO_vs_wt	-0.0938054	0.263029	-0.0584607	0.999978	0.030954	0.99997	111.304	140.016	104.184	135.839
ENSMUSG00000008200.14	Fnbp4	cKO_vs_wt	-0.0340004	0.813185	-0.118412	0.999978	-0.0888209	0.99997	111.547	84.2883	108.737	78.8685
ENSMUSG00000003068.16	Stk11	cKO_vs_wt	0.0357205	0.775397	0.0144325	0.999978	-0.0321048	0.99997	111.666	31.3867	114.335	32.3179
ENSMUSG00000042744.16	Hectd4	cKO_vs_wt	-0.0167951	0.960079	0.0048839	0.999978	0.0159406	0.99997	111.292	65.7731	109.868	66.8004
ENSMUSG00000023079.14	Gtf2ird1	cKO_vs_wt	0.05832	0.651544	-0.0469412	0.999978	-0.111042	0.99997	92.0612	51.3538	95.7681	50.4021
ENSMUSG00000027176.8	Cstf3	cKO_vs_wt	-0.0629223	0.563868	-0.0209462	0.999978	0.0385014	0.99997	111.543	155.608	106.561	154.924
ENSMUSG00000020186.7	Csrp2	cKO_vs_wt	-0.0897304	0.584671	-0.0892806	0.999978	-0.00430518	0.99997	111.588	204.451	104.646	194.504
ENSMUSG00000003037.16	Rab8a	cKO_vs_wt	-0.0364124	0.688294	-0.0180727	0.999978	0.0131588	0.99997	111.545	170.72	108.588	170.655
ENSMUSG00000035248.9	Tut7	cKO_vs_wt	-0.0358299	0.762764	-0.0620957	0.999978	-0.0291237	0.99997	111.36	49.6375	108.464	48.0404
ENSMUSG00000078676.9	Casc3	cKO_vs_wt	-0.00868679	0.959665	-0.0659041	0.999978	-0.0615941	0.99997	111.3	127.47	110.483	123.398
ENSMUSG00000051220.2	Ercc6l	cKO_vs_wt	-0.0293476	0.772071	0.0163726	0.999978	0.0415487	0.99997	111.248	116.253	108.822	118.621
ENSMUSG00000022814.6	Umps	cKO_vs_wt	-0.0517847	0.625156	-0.00494497	0.999978	0.0432394	0.99997	111.261	182.601	107.208	183.769
ENSMUSG00000020844.6	Nxn	cKO_vs_wt	0.0369197	0.852622	0.00601085	0.999978	-0.0340645	0.99997	111.225	184.504	114.038	187.73
ENSMUSG00000060098.11	Prmt7	cKO_vs_wt	-0.0656988	0.48752	0.0718064	0.999978	0.133037	0.890648	111.189	93.0342	106.009	98.8672
ENSMUSG00000022043.19	Trim35	cKO_vs_wt	0.0296821	0.837712	-0.0408942	0.999978	-0.0744702	0.99997	111.148	259.6	113.254	255.445
ENSMUSG00000020483.14	Dynll2	cKO_vs_wt	0.16386	0.0578284	0.178882	0.999978	0.0114334	0.99997	110.824	233.257	123.986	268.292
ENSMUSG00000061559.15	Wdr61	cKO_vs_wt	0.00500779	0.980295	-0.0788253	0.999978	-0.0882692	0.99997	111.02	182.012	111.203	174.193
[truncated: 20,404 more rows]

## Sheet: WT TE
gene_id	gene_name	base_TE_allreads	RNA_cpm_base_allreads	Ribo_cpm_base_allreads
ENSMUSG00000037742.14	Eef1a1	-1.83681	15904	4452.18
ENSMUSG00000023944.14	Hsp90ab1	-0.1639	6606.11	5896.67
ENSMUSG00000057666.18	Gapdh	-4.53298	5333.54	230.384
ENSMUSG00000046434.16	Hnrnpa1	-1.67814	4574.95	1429.6
ENSMUSG00000001525.10	Tubb5	0.864203	4195.82	7637.8
ENSMUSG00000052187.4	Hbb-y	2.09412	3978.29	16985.9
ENSMUSG00000034994.10	Eef2	-0.705383	3864.59	2370.07
ENSMUSG00000015656.17	Hspa8	-1.00224	3663.13	1828.73
ENSMUSG00000072235.6	Tuba1a	-1.13671	3639.78	1655.35
ENSMUSG00000023004.8	Tuba1b	-1.42527	3617.85	1347.11
ENSMUSG00000029580.14	Actb	0.945437	3514.57	6768.27
ENSMUSG00000004980.16	Hnrnpa2b1	0.541811	3303.2	4808.8
ENSMUSG00000032518.6	Rpsa	-3.68804	3272.55	253.908
ENSMUSG00000005610.17	Eif4g2	-2.58534	3209.78	534.825
ENSMUSG00000055609.8	Hba-x	1.41171	3073.93	8178.25
ENSMUSG00000021270.13	Hsp90aa1	-0.449222	3023.05	2214.2
ENSMUSG00000032294.17	Pkm	0.0594578	2994.88	3120.88
ENSMUSG00000059005.13	Hnrnpa3	-1.41336	2804.43	1052.89
ENSMUSG00000026238.14	Ptma	0.316557	2705.08	3368.79
ENSMUSG00000057113.13	Npm1	-0.0252486	2666.05	2619.8
ENSMUSG00000039630.10	Hnrnpu	0.109595	2591.51	2796.05
ENSMUSG00000062825.15	Actg1	-0.335012	2542.27	2015.45
ENSMUSG00000116358.1	Gm49450	-1.00142	2480.48	1239.02
ENSMUSG00000032216.15	Nedd4	0.00800211	2448.79	2462.41
ENSMUSG00000026234.12	Ncl	0.247425	2437.22	2893.19
ENSMUSG00000032399.8	Rpl4	-0.880696	2370.61	1287.49
ENSMUSG00000045136.6	Tubb2b	-0.609983	2236.39	1465.29
ENSMUSG00000067274.10	Rplp0	-1.96425	2202.75	564.505
ENSMUSG00000060036.14	Rpl3	-1.49656	2186.06	774.734
ENSMUSG00000064351.1	mt-Co1	-4.72227	2142.13	81.1522
ENSMUSG00000019505.7	Ubb	-1.09582	2123.61	993.574
ENSMUSG00000021546.18	Hnrnpk	-0.0399392	2104.74	2047.28
ENSMUSG00000066551.12	Hmgb1	-2.5353	2094.14	361.248
ENSMUSG00000071866.12	Ppia	-0.960889	2018.29	1036.88
ENSMUSG00000059796.16	Eif4a1	0.0385609	2007.15	2061.52
ENSMUSG00000063524.13	Eno1	-0.90981	1980.95	1054.37
ENSMUSG00000062647.16	Rpl7a	-1.15328	1918.49	862.556
ENSMUSG00000052217.6	Hbb-bh1	1.44053	1897.97	5151.49
ENSMUSG00000043716.13	Rpl7	-0.698529	1880.39	1158.7
ENSMUSG00000060126.14	Tpt1	-1.09126	1818.24	853.39
ENSMUSG00000028081.6	Rps3a1	-2.25254	1797.96	377.31
ENSMUSG00000031320.9	Rps4x	-1.70153	1785.45	548.955
ENSMUSG00000026728.9	Vim	0.705481	1744.88	2845.36
ENSMUSG00000022283.15	Pabpc1	-1.78026	1731.18	503.999
ENSMUSG00000029614.13	Rpl6	-1.76993	1706.3	500.326
ENSMUSG00000047675.15	Rps8	-3.24462	1669.03	176.09
ENSMUSG00000028639.14	Ybx1	-1.35893	1655.98	645.618
ENSMUSG00000089989.10	Gm45713	-1.12033	1634.66	751.923
ENSMUSG00000074129.14	Rpl13a	-1.10843	1634.25	757.964
ENSMUSG00000020849.13	Ywhae	1.4918	1583.49	4453.4
ENSMUSG00000020914.17	Top2a	-0.129585	1576.54	1441.1
ENSMUSG00000030795.18	Fus	-0.499203	1555.02	1100.17
ENSMUSG00000054717.7	Hmgb2	-0.968015	1545.16	789.898
ENSMUSG00000058558.12	Rpl5	-1.41326	1544.01	579.719
ENSMUSG00000028495.14	Rps6	-0.994587	1542.62	774.211
ENSMUSG00000020719.14	Ddx5	-0.0520498	1522.29	1468.35
ENSMUSG00000025290.17	Rps24	-2.64861	1498.32	238.942
ENSMUSG00000063229.15	Ldha	-0.328653	1494.29	1189.87
ENSMUSG00000003970.9	Rpl8	0.715803	1494.26	2454.17
ENSMUSG00000007850.16	Hnrnph1	-0.112324	1489.22	1377.67
ENSMUSG00000044533.15	Rps2	-1.17242	1465.23	650.089
ENSMUSG00000020358.17	Hnrnpab	0.5368	1464.74	2124.97
ENSMUSG00000006333.14	Rps9	0.106776	1463.29	1575.7
ENSMUSG00000071644.10	Eef1g	-2.16787	1458.94	324.671
ENSMUSG00000069919.7	Hba-a1	1.47393	1455.32	4042.55
ENSMUSG00000008682.13	Rpl10	-2.33676	1444.92	286.03
ENSMUSG00000020372.15	Rack1	0.367225	1424.24	1837.09
ENSMUSG00000058799.16	Nap1l1	0.179594	1396.34	1581.44
ENSMUSG00000058546.8	Rpl23a	-2.88214	1389.26	188.439
ENSMUSG00000028693.15	Nasp	0.223877	1361.57	1590.13
ENSMUSG00000071415.6	Rpl23	-1.56871	1345.19	453.477
ENSMUSG00000003429.11	Rps11	-0.446547	1341.86	984.65
ENSMUSG00000004891.16	Nes	-0.231373	1333.49	1135.9
ENSMUSG00000054766.13	Set	-0.694383	1322.36	817.185
ENSMUSG00000024740.10	Ddb1	-0.192469	1313.83	1149.75
ENSMUSG00000063870.12	Chd4	-0.588847	1289.38	857.275
ENSMUSG00000056201.8	Cfl1	0.486399	1288.27	1804.79
ENSMUSG00000029430.13	Ran	-0.243655	1285.12	1085.42
ENSMUSG00000028452.7	Vcp	-0.690205	1284.03	795.796
ENSMUSG00000039218.17	Srrm2	-0.687612	1275.12	791.699
ENSMUSG00000038900.17	Rpl12	-1.89168	1274.49	343.466
ENSMUSG00000052727.6	Map1b	0.0239796	1268.12	1289.37
ENSMUSG00000025393.12	Atp5b	0.597056	1267.35	1917.03
ENSMUSG00000049517.8	Rps23	-1.11429	1260.03	582.032
ENSMUSG00000030744.13	Rps3	0.105679	1251.28	1346.38
ENSMUSG00000024393.14	Prrc2a	-2.10138	1246.42	290.458
ENSMUSG00000025428.15	Atp5a1	0.506245	1245.7	1769.33
ENSMUSG00000079523.8	Tmsb10	-0.700194	1243.13	765.136
ENSMUSG00000061477.4	Rps7	-1.78459	1239.86	359.878
ENSMUSG00000045128.9	Rpl18a	-1.56598	1232.79	416.371
ENSMUSG00000069917.7	Hba-a2	1.58749	1228.25	3691.2
ENSMUSG00000037894.13	H2afz	0.227294	1224.7	1433.68
ENSMUSG00000025794.9	Rpl14	-1.07591	1214.22	575.994
ENSMUSG00000020460.15	Rps27a	-1.61216	1213.06	396.803
ENSMUSG00000041453.12	Rpl21	-2.71119	1212.42	185.142
ENSMUSG00000001440.5	Kpnb1	0.142044	1201.11	1325.38
ENSMUSG00000000568.15	Hnrnpd	0.404274	1186.77	1570.6
ENSMUSG00000005566.14	Trim28	0.112289	1170.2	1264.92
ENSMUSG00000042699.11	Dhx9	-0.128189	1169.02	1069.63
ENSMUSG00000064370.1	mt-Cytb	-5.16908	1159.42	32.2249
ENSMUSG00000064341.1	mt-Nd1	-6.07952	1157.22	17.112
ENSMUSG00000017404.12	Rpl19	-1.7441	1155.77	345.022
ENSMUSG00000045983.16	Eif4g1	-0.976711	1154.64	586.713
ENSMUSG00000062070.12	Pgk1	-1.13716	1149.69	522.709
ENSMUSG00000036371.6	Serbp1	0.272391	1147.34	1385.77
ENSMUSG00000050708.16	Ftl1	-2.98088	1144.85	145.016
ENSMUSG00000027523.20	Gnas	0.19029	1139.21	1299.83
ENSMUSG00000027184.14	Caprin1	-0.0568071	1122.74	1079.39
ENSMUSG00000028820.13	Sfpq	-0.19106	1118.89	980.102
ENSMUSG00000061315.14	Naca	-0.468831	1114.86	805.545
ENSMUSG00000057841.5	Rpl32	-1.09957	1079.33	503.673
ENSMUSG00000006932.17	Ctnnb1	0.5712	1076.69	1599.7
ENSMUSG00000059208.15	Hnrnpm	0.327701	1075.53	1349.8
ENSMUSG00000031311.17	Nono	-0.343274	1072.32	845.253
ENSMUSG00000024608.11	Rps14	-0.357055	1059.75	827.403
ENSMUSG00000030432.12	Rpl28	-1.51422	1056.55	369.884
ENSMUSG00000047215.14	Rpl9	-1.36061	1053.32	410.182
ENSMUSG00000063457.14	Rps15	-1.17009	1048.32	465.865
ENSMUSG00000006728.12	Cdk4	-0.28654	1040.67	853.211
ENSMUSG00000001924.15	Uba1	0.121144	1027.75	1117.78
ENSMUSG00000024991.8	Eif3a	-0.294248	1022.89	834.161
ENSMUSG00000062328.8	Rpl17	-2.45224	1019.99	186.38
ENSMUSG00000056851.14	Pcbp2	-0.420972	1013.1	756.705
ENSMUSG00000012405.16	Rpl15	-1.64222	1011.56	324.066
ENSMUSG00000028832.11	Stmn1	0.442247	1002.75	1362.46
ENSMUSG00000073702.11	Rpl31	-1.84758	995.406	276.581
ENSMUSG00000032249.14	Anp32a	0.668142	973.886	1547.53
ENSMUSG00000008348.9	Ubc	-0.0562369	968.27	931.253
ENSMUSG00000020850.14	Prpf8	-0.851957	961.652	532.787
ENSMUSG00000025362.6	Rps26	-0.856502	954.154	526.97
ENSMUSG00000057236.10	Rbbp4	-0.0854442	953.408	898.582
ENSMUSG00000032187.16	Smarca4	-1.19156	950.879	416.323
ENSMUSG00000061787.15	Rps17	-0.978984	934.528	474.12
ENSMUSG00000008668.15	Rps18	-1.08822	920.808	433.094
ENSMUSG00000068823.10	Csde1	-1.12528	916.017	419.915
ENSMUSG00000028484.16	Psip1	-0.545196	903.34	619.058
ENSMUSG00000009079.16	Ewsr1	-0.760255	901.959	532.51
ENSMUSG00000071172.13	Srsf3	-0.459842	900.591	654.789
ENSMUSG00000026496.11	Parp1	-0.356348	892.531	697.191
ENSMUSG00000025153.9	Fasn	-0.193286	889.41	777.888
ENSMUSG00000030662.10	Ipo5	-0.172728	888.883	788.584
ENSMUSG00000015165.16	Hnrnpl	1.18375	885.136	2010.73
ENSMUSG00000017485.11	Top2b	-0.685627	873.843	543.299
ENSMUSG00000068039.13	Tcp1	0.388996	869.944	1139.18
ENSMUSG00000024590.8	Lmnb1	0.728813	866.809	1436.54
ENSMUSG00000028333.10	Anp32b	0.3469	863.939	1098.78
ENSMUSG00000062997.6	Rpl35	-0.922635	857.202	452.212
ENSMUSG00000005161.15	Prdx2	0.355799	853.734	1092.52
ENSMUSG00000000787.12	Ddx3x	0.338428	853.692	1079.39
ENSMUSG00000024853.10	Sf3b2	-0.219524	845.598	726.241
ENSMUSG00000060938.14	Rpl26	-1.06784	845.108	403.145
ENSMUSG00000038252.13	Ncapd2	-0.73785	843.038	505.513
ENSMUSG00000022234.15	Cct5	0.518974	831.245	1191.12
ENSMUSG00000025261.17	Huwe1	-1.18932	828.395	363.26
ENSMUSG00000060743.12	H3f3a	-1.61788	826.334	269.232
ENSMUSG00000007892.8	Rplp1	-1.69381	825.864	255.283
ENSMUSG00000025980.14	Hspd1	-0.292512	824.815	673.444
ENSMUSG00000053931.11	Cnn3	-1.04246	824.383	400.236
ENSMUSG00000020900.15	Myh10	0.176595	823.945	931.233
ENSMUSG00000025613.13	Cct8	0.664418	816.223	1293.65
ENSMUSG00000046364.14	Rpl27a	-1.01956	812.838	400.947
ENSMUSG00000064357.1	mt-Atp6	-3.6628	812.662	64.1649
ENSMUSG00000031004.8	Mki67	-1.29465	806.128	328.605
ENSMUSG00000042079.13	Hnrnpf	-1.24107	805.822	340.91
ENSMUSG00000030695.16	Aldoa	-0.435971	805.272	595.254
ENSMUSG00000060261.15	Gtf2i	-1.06308	805.158	385.357
ENSMUSG00000098274.7	Rpl24	-1.03707	802.796	391.217
ENSMUSG00000043091.9	Tuba1c	0.14009	794.076	875.05
ENSMUSG00000059291.15	Rpl11	-0.0123883	793.577	786.791
ENSMUSG00000006998.16	Psmd2	-0.200447	792.905	690.05
ENSMUSG00000016559.14	H3f3b	-0.333909	791.434	627.911
ENSMUSG00000025982.13	Sf3b1	0.0145355	786.998	794.968
ENSMUSG00000055553.16	Kxd1	-0.830046	786.341	442.325
ENSMUSG00000060373.15	Hnrnpc	0.385081	786.191	1026.71
ENSMUSG00000023456.15	Tpi1	0.394467	785.872	1033
ENSMUSG00000037236.16	Matr3	-0.0608012	783.141	750.822
ENSMUSG00000062270.14	Morf4l1	-1.81996	777.812	220.298
ENSMUSG00000034024.8	Cct2	0.126912	768.86	839.56
ENSMUSG00000004099.16	Dnmt1	-0.326426	765.344	610.369
ENSMUSG00000040785.19	Ttc3	-1.7794	763.728	222.478
ENSMUSG00000027067.16	Ssrp1	-0.575194	760.422	510.392
ENSMUSG00000019432.15	Ddx39b	0.555676	759.379	1116.18
ENSMUSG00000034349.14	Smc4	-0.991417	758.66	381.594
ENSMUSG00000012848.15	Rps5	0.408941	757.683	1005.98
ENSMUSG00000090137.8	Uba52	-0.818287	757.41	429.538
ENSMUSG00000029447.11	Cct6a	0.519635	755.145	1082.57
ENSMUSG00000009927.9	Rps25	-1.03579	750.71	366.157
ENSMUSG00000018362.14	Kpna2	-0.842429	744.797	415.376
ENSMUSG00000028410.13	Dnaja1	-1.51102	741.446	260.146
ENSMUSG00000022285.17	Ywhaz	0.664751	737.786	1169.61
ENSMUSG00000062380.4	Tubb3	0.443957	737.24	1002.89
ENSMUSG00000021910.15	Nisch	-0.432472	732.671	542.903
ENSMUSG00000030978.10	Rrm1	0.558061	732.405	1078.31
ENSMUSG00000035726.8	Supt16	0.456217	730.858	1002.69
ENSMUSG00000008683.16	Rps15a	-0.417681	728.244	545.183
ENSMUSG00000059070.16	Rpl18	-1.18489	725.505	319.12
ENSMUSG00000040549.16	Ckap5	0.0097129	722.959	727.843
ENSMUSG00000070544.6	Top1	-0.0721406	719.925	684.811
ENSMUSG00000047945.6	Marcksl1	-0.65468	718.616	456.476
ENSMUSG00000001416.13	Cct3	0.627138	712.456	1100.39
ENSMUSG00000078812.10	Eif5a	0.143216	711.26	785.49
ENSMUSG00000041459.15	Tardbp	0.0089345	710.042	714.453
ENSMUSG00000025151.16	Maged1	-0.16995	708.568	629.827
ENSMUSG00000033732.10	Sf3b3	-0.277254	707.098	583.469
ENSMUSG00000117338.1	Gm49804	-0.88444	706.63	382.78
ENSMUSG00000031715.14	Smarca5	-1.36573	701.49	272.205
ENSMUSG00000022961.18	Son	-1.02609	699.499	343.482
ENSMUSG00000061983.7	Rps12	-1.37249	698.767	269.88
ENSMUSG00000029730.16	Mcm7	0.037187	695.99	714.163
ENSMUSG00000109324.2	Prmt1	0.433621	691.239	933.601
ENSMUSG00000049775.16	Tmsb4x	0.659577	690.59	1090.87
ENSMUSG00000020917.17	Acly	-0.0470627	689.455	667.327
ENSMUSG00000016319.3	Slc25a5	-0.651601	687.263	437.493
ENSMUSG00000030357.10	Fkbp4	0.094192	686.136	732.428
ENSMUSG00000027342.14	Pcna	0.465722	683.146	943.43
ENSMUSG00000030738.11	Eif3c	0.170348	682.816	768.393
ENSMUSG00000058600.13	Rpl30	-1.43295	675.595	250.221
ENSMUSG00000047126.17	Cltc	0.805672	674.706	1179.36
ENSMUSG00000029247.17	Paics	-0.0661716	668.481	638.512
ENSMUSG00000031328.15	Flna	-0.38705	667.571	510.486
ENSMUSG00000011179.8	Odc1	-2.87412	662.469	90.3587
ENSMUSG00000064354.1	mt-Co2	-4.38388	661.683	31.6936
ENSMUSG00000037805.15	Rpl10a	-0.828037	661.501	372.62
ENSMUSG00000043962.16	Thrap3	-1.53539	658.536	227.186
ENSMUSG00000046330.10	Rpl37a	-1.41094	658.017	247.458
ENSMUSG00000058655.9	Eif4b	-0.36461	653.516	507.572
ENSMUSG00000093930.2	Hmgcs1	0.707342	653.137	1066.44
ENSMUSG00000020649.11	Rrm2	0.668724	652.309	1036.95
ENSMUSG00000025967.16	Eef1b2	-0.345109	651.867	513.181
ENSMUSG00000034088.15	Hdlbp	-0.69171	646.172	400.058
ENSMUSG00000030435.16	U2af2	-0.279627	645.347	531.64
ENSMUSG00000036550.16	Cnot1	-1.47812	645.252	231.617
ENSMUSG00000028034.15	Fubp1	-0.0232919	645.086	634.754
ENSMUSG00000024966.9	Stip1	0.240954	644.232	761.336
ENSMUSG00000021218.10	Gdi2	0.0588337	643.261	670.035
ENSMUSG00000030007.8	Cct7	-0.0458458	637.591	617.648
ENSMUSG00000001270.9	Ckb	1.44762	635.949	1734.6
ENSMUSG00000036752.4	Tubb4b	0.199326	633.826	727.735
ENSMUSG00000029064.15	Gnb1	0.0276768	632.686	644.94
ENSMUSG00000020361.13	Hspa4	0.181331	629.938	714.305
ENSMUSG00000052146.16	Rps10	-0.696524	624.908	385.604
ENSMUSG00000051223.14	Bzw1	-0.355779	622.916	486.776
ENSMUSG00000007564.15	Ppp2r1a	0.475576	619.48	861.37
ENSMUSG00000093674.7	Rpl41	0.317417	618.388	770.572
ENSMUSG00000063316.13	Rpl27	-0.580624	617.393	412.835
ENSMUSG00000068882.13	Ssb	-0.0233882	616.15	606.242
ENSMUSG00000029169.11	Dhx15	-0.101368	615.44	573.682
ENSMUSG00000090733.6	Rps27	-2.56987	613.818	103.379
ENSMUSG00000003660.10	Snrnp200	0.262221	606.955	727.936
ENSMUSG00000064363.1	mt-Nd4	-6.09176	605.211	8.87369
ENSMUSG00000020176.17	Grb10	0.437602	604.761	819.058
ENSMUSG00000091228.1	Gm20390	0.47798	601.659	837.986
ENSMUSG00000026355.11	Mcm6	-0.0312977	598.957	586.103
ENSMUSG00000028691.12	Prdx1	-0.413732	596.706	447.934
ENSMUSG00000015749.12	Anp32e	0.992171	593.331	1180.24
ENSMUSG00000003038.15	Hmgn2	-1.20536	590.533	256.091
ENSMUSG00000034892.8	Rps29	0.0888892	588.531	625.932
ENSMUSG00000006005.18	Tpr	-0.57533	588.494	394.957
ENSMUSG00000036427.5	Gpi1	-0.366158	586.357	454.922
ENSMUSG00000025364.13	Pa2g4	-0.10412	586.189	545.375
ENSMUSG00000018379.17	Srsf1	0.938975	585.126	1121.78
ENSMUSG00000032481.17	Smarcc1	-0.148721	584.799	527.518
ENSMUSG00000001228.14	Uhrf1	-0.0674246	581.565	555.01
ENSMUSG00000021377.15	Dek	-0.327688	581.562	463.396
ENSMUSG00000022185.19	Acin1	-0.609947	579.224	379.52
ENSMUSG00000026074.15	Map4k4	-1.2284	575.484	245.611
ENSMUSG00000037563.15	Rps16	-0.409472	574.128	432.26
ENSMUSG00000090862.3	Rps13	-0.654353	573.792	364.565
ENSMUSG00000023150.14	Ivns1abp	-1.13145	571.966	261.078
ENSMUSG00000040945.13	Rcc2	0.186129	571.374	650.057
ENSMUSG00000029687.16	Ezh2	-0.403677	569.763	430.701
ENSMUSG00000018583.5	G3bp1	-0.128087	569.68	521.282
ENSMUSG00000005198.15	Polr2a	-1.16316	567.364	253.348
ENSMUSG00000007739.10	Cct4	0.588383	566.731	852.115
ENSMUSG00000055065.7	Ddx17	-0.245596	565.223	476.747
ENSMUSG00000019961.17	Tmpo	0.393458	560.259	735.921
ENSMUSG00000015217.11	Hmgb3	-0.67287	558.634	350.407
ENSMUSG00000002748.7	Baz1b	-0.680559	557.141	347.613
ENSMUSG00000037608.16	Bclaf1	-0.59096	556.43	369.414
ENSMUSG00000057406.16	Nsd2	-1.20244	555.411	241.348
ENSMUSG00000066037.14	Hnrnpr	-1.00395	554.976	276.729
ENSMUSG00000031386.14	Hcfc1	-1.32422	553.52	221.057
ENSMUSG00000040385.7	Ppp1ca	0.534698	547.953	793.786
ENSMUSG00000021660.14	Btf3	-0.41122	544.658	409.576
ENSMUSG00000020929.14	Eftud2	-0.132226	541.753	494.308
ENSMUSG00000026605.14	Cenpf	-0.368547	539.03	417.512
ENSMUSG00000037487.7	Ubr5	-0.980267	538.442	272.929
ENSMUSG00000056076.13	Eif3b	0.103328	533.769	573.401
ENSMUSG00000015937.15	H2afy	0.230572	533.54	626.002
ENSMUSG00000029472.13	Anapc5	-1.75322	531.995	157.811
ENSMUSG00000036438.14	Calm2	0.283973	529.843	645.107
ENSMUSG00000060636.14	Rpl35a	-2.89668	528.035	70.9049
ENSMUSG00000071659.4	Hnrnpul2	-0.56097	527.732	357.721
ENSMUSG00000117694.1	Gm28285	-0.360132	527.535	410.999
ENSMUSG00000020738.16	Sumo2	-2.36986	525.208	101.609
ENSMUSG00000007880.16	Arid1a	-1.10067	524.646	244.643
ENSMUSG00000041841.8	Rpl37	0.451476	523.169	715.402
ENSMUSG00000040463.16	Mybbp1a	-0.0408641	520.553	506.015
ENSMUSG00000064367.1	mt-Nd5	-4.72613	518.385	19.586
ENSMUSG00000028234.6	Rps20	-0.53769	517.735	356.654
ENSMUSG00000053877.12	Srcap	-2.11931	517.493	119.104
ENSMUSG00000026219.14	Trip12	-1.00628	516.955	257.355
ENSMUSG00000026083.12	Eif5b	-0.978656	516.366	262.031
ENSMUSG00000024359.10	Hspa9	0.0517193	515.623	534.443
ENSMUSG00000005410.6	Mcm5	-0.353217	514.988	403.151
ENSMUSG00000107023.2	Gm42715	-2.14758	514.577	116.136
ENSMUSG00000006498.16	Ptbp1	-0.159681	513.26	459.483
ENSMUSG00000029581.14	Fscn1	0.879154	511.88	941.5
ENSMUSG00000064358.1	mt-Co3	-3.67578	510.802	39.9698
ENSMUSG00000018707.13	Dync1h1	-0.980205	509.474	258.256
ENSMUSG00000018474.17	Chd3	-2.4117	507.734	95.4207
ENSMUSG00000074656.12	Eif2s2	-1.27519	504.296	208.36
ENSMUSG00000040952.16	Rps19	-0.770079	504.144	295.623
ENSMUSG00000020680.15	Taf15	-0.578299	503.936	337.513
ENSMUSG00000079435.9	Rpl36a	-0.439875	498.933	367.812
ENSMUSG00000029836.15	Cbx3	-0.992445	498.923	250.771
ENSMUSG00000024949.17	Sf1	-0.268989	498.608	413.795
ENSMUSG00000032423.12	Syncrip	-0.20687	498.284	431.721
ENSMUSG00000024974.10	Smc3	-0.435975	494.114	365.246
ENSMUSG00000031167.16	Rbm3	0.129398	492.266	538.459
ENSMUSG00000076432.13	Ywhaq	-0.445727	491.979	361.218
ENSMUSG00000022858.16	Tra2b	-0.168996	491.82	437.455
ENSMUSG00000037935.16	Smarce1	-1.84627	491.642	136.731
ENSMUSG00000041859.10	Mcm3	0.29881	481.508	592.318
ENSMUSG00000019777.16	Hdac2	0.00715787	480.433	482.822
ENSMUSG00000042520.16	Ubap2l	-1.12274	478.91	219.925
ENSMUSG00000040725.13	Hnrnpul1	-1.29108	476.811	194.846
ENSMUSG00000027620.16	Rbm39	0.227888	476.652	558.216
ENSMUSG00000005732.14	Ranbp1	0.325368	474.115	594.059
ENSMUSG00000028809.16	Srrm1	-0.966668	473.109	242.083
ENSMUSG00000066357.6	Wdr6	0.032088	469.956	480.525
ENSMUSG00000028936.15	Rpl22	0.711357	468.5	767.095
ENSMUSG00000063511.11	Snrnp70	0.350829	468.089	596.951
ENSMUSG00000026229.17	Psmd1	-0.429944	467.254	346.838
ENSMUSG00000040225.15	Prrc2c	-0.752656	466.893	277.106
ENSMUSG00000035150.15	Eif2s3x	-0.652196	466.383	296.765
ENSMUSG00000048758.14	Rpl29	-3.36227	465.41	45.2576
ENSMUSG00000032562.13	Gnai2	-0.0869351	463.953	436.822
ENSMUSG00000004455.16	Ppp1cc	-1.60062	463.876	152.956
ENSMUSG00000041133.11	Smc1a	-0.318402	462.432	370.851
ENSMUSG00000025132.13	Arhgdia	0.822099	461.839	816.52
ENSMUSG00000026553.17	Copa	-0.13589	460.967	419.53
ENSMUSG00000067288.13	Rps28	-0.65669	458.539	290.866
ENSMUSG00000029328.15	Hnrnpdl	0.350942	458.264	584.467
ENSMUSG00000066232.4	Ipo7	0.211547	457.652	529.929
ENSMUSG00000021134.17	Srsf5	-0.438981	456.605	336.817
ENSMUSG00000038274.13	Fau	-0.324464	456.101	364.24
ENSMUSG00000001016.12	Ilf2	-0.119854	455.326	419.028
ENSMUSG00000022314.10	Rad21	-0.225016	453.942	388.386
ENSMUSG00000025508.13	Rplp2	0.295822	453.755	557.022
ENSMUSG00000021282.17	Eif5	-1.14665	453.419	204.797
ENSMUSG00000021178.9	Psmc1	-0.391498	453.043	345.372
ENSMUSG00000028134.11	Ptbp2	-0.073064	452.359	430.02
ENSMUSG00000061904.12	Slc25a3	0.427993	451.452	607.365
ENSMUSG00000000740.12	Rpl13	-0.870882	449.899	246.01
ENSMUSG00000030057.15	Cnbp	0.999561	448.628	896.984
ENSMUSG00000002718.14	Cse1l	-0.0365248	447.878	436.682
ENSMUSG00000002870.8	Mcm2	0.146889	447.456	495.414
ENSMUSG00000024097.11	Srsf7	0.708608	446.438	729.581
ENSMUSG00000022191.16	Drosha	-1.67106	446.217	140.122
ENSMUSG00000020114.12	Cand1	0.373203	444.922	576.274
ENSMUSG00000010608.15	Rbm25	-0.628401	442.724	286.395
ENSMUSG00000056394.17	Lig1	-0.516665	442.289	309.154
ENSMUSG00000031948.14	Kars	-0.570674	441.804	297.467
ENSMUSG00000018501.17	Ncor1	-1.93253	440.527	115.405
ENSMUSG00000031010.17	Usp9x	-0.460839	438.555	318.638
ENSMUSG00000040850.17	Psme4	-1.1925	438.511	191.868
ENSMUSG00000022673.5	Mcm4	0.0638633	437.358	457.153
ENSMUSG00000027469.16	Tpx2	-0.309	435.999	351.939
ENSMUSG00000051695.6	Pcbp1	0.747644	435.183	730.693
ENSMUSG00000039001.12	Rps21	0.30087	435.074	535.962
ENSMUSG00000026615.14	Eprs	-0.368321	433.54	335.856
ENSMUSG00000041740.16	Rnf10	-3.2243	433.509	46.3862
ENSMUSG00000040731.13	Eif4h	0.540804	432.245	628.823
ENSMUSG00000021957.7	Tkt	0.214858	431.758	501.094
ENSMUSG00000024392.17	Bag6	-0.572646	429.643	288.884
ENSMUSG00000013629.16	Cad	0.209332	427.901	494.719
ENSMUSG00000024735.13	Prpf19	0.24611	427.739	507.301
ENSMUSG00000037149.10	Ddx1	0.502836	427.066	605.152
ENSMUSG00000014355.10	Anapc1	-0.697115	426.446	263.034
ENSMUSG00000020349.4	Ppp2ca	0.488616	426.117	597.884
ENSMUSG00000022336.3	Eif3e	-0.82762	425.695	239.862
ENSMUSG00000029623.14	Pdap1	-0.0214301	424.669	418.408
ENSMUSG00000064345.1	mt-Nd2	-5.59484	423.537	8.76347
ENSMUSG00000020074.7	Ccar1	-1.00616	422.692	210.445
ENSMUSG00000035242.15	Oaz1	-1.12777	422.381	193.292
ENSMUSG00000036309.14	Skp1a	1.29101	421.683	1031.85
ENSMUSG00000028790.13	Khdrbs1	0.900469	420.4	784.75
ENSMUSG00000017421.18	Zfp207	-0.482133	419.548	300.362
ENSMUSG00000022841.15	Ap2m1	-1.54356	419.145	143.783
ENSMUSG00000031422.16	Morf4l2	-0.484353	418.323	299.024
ENSMUSG00000037815.7	Ctnna1	0.264115	417.148	500.953
ENSMUSG00000096210.2	H1f0	-0.905651	416.808	222.488
ENSMUSG00000032178.14	Ilf3	-0.556895	415.32	282.319
ENSMUSG00000058013.11	2022-09-11	0.195858	414.799	475.112
ENSMUSG00000062867.13	Impdh2	-0.531763	414.057	286.407
ENSMUSG00000021111.15	Papola	-2.12185	411.743	94.5992
ENSMUSG00000035530.13	Eif1	-0.567546	410.952	277.296
ENSMUSG00000022710.17	Usp7	-1.07879	406.204	192.307
ENSMUSG00000029657.15	Hsph1	0.0716315	405.172	425.797
ENSMUSG00000028426.10	Rad23b	0.309038	404.038	500.555
ENSMUSG00000020857.11	Nme2	0.417239	402.469	537.445
ENSMUSG00000066306.13	Numa1	-0.661414	400.503	253.221
ENSMUSG00000020290.14	Xpo1	-0.278412	398.299	328.397
ENSMUSG00000051149.15	Adnp	-1.2957	397.92	162.088
ENSMUSG00000037373.12	Ctbp1	-1.34811	397.218	156.029
ENSMUSG00000022403.15	St13	0.0239451	396.399	403.033
ENSMUSG00000005417.17	Mprip	-2.33804	396.124	78.3448
ENSMUSG00000071547.4	Nt5dc2	-0.872762	394.169	215.256
ENSMUSG00000070713.5	Gm10282	-2.99109	393.714	49.5191
ENSMUSG00000020277.10	Pfkl	0.0116473	391.847	395.024
ENSMUSG00000041235.12	Chd7	-1.48934	391.204	139.337
ENSMUSG00000046711.16	Hmga1	-1.137	390.897	177.742
ENSMUSG00000043909.16	Trp53bp1	-0.584218	390.825	260.684
ENSMUSG00000002102.15	Psmc3	-0.139556	390.493	354.489
ENSMUSG00000031633.4	Slc25a4	0.714465	389.533	639.174
ENSMUSG00000037364.12	Srrt	-0.455196	388.477	283.359
ENSMUSG00000020949.9	Fkbp3	0.662725	387.959	614.167
ENSMUSG00000036112.15	Metap2	-0.525001	387.513	269.306
ENSMUSG00000028560.11	Usp1	-1.66993	383.496	120.521
ENSMUSG00000031353.13	Rbbp7	0.17904	382.904	433.497
ENSMUSG00000029250.5	Polr2b	-0.34834	381.499	299.663
ENSMUSG00000040481.17	Bptf	-1.76653	378.527	111.255
ENSMUSG00000060206.11	Zfp462	-0.831912	378.323	212.536
ENSMUSG00000018293.4	Pfn1	1.51607	377.453	1079.56
ENSMUSG00000041431.16	Ccnb1	-0.304712	377.28	305.448
ENSMUSG00000029686.15	Cul1	-1.09276	377.267	176.886
ENSMUSG00000059119.9	Nap1l4	0.196208	376.53	431.384
ENSMUSG00000000247.11	Lhx2	-1.41039	375.918	141.424
ENSMUSG00000032555.10	Topbp1	-1.75918	375.186	110.836
ENSMUSG00000024335.20	Brd2	-1.91663	373.857	99.0244
ENSMUSG00000012443.4	Kif11	0.129827	373.584	408.761
ENSMUSG00000016554.9	Eif3d	0.149764	372.805	413.586
ENSMUSG00000016541.10	Atxn10	0.985801	372.697	738.094
ENSMUSG00000027940.18	Tpm3	0.653509	372.463	585.88
ENSMUSG00000000563.17	Atp5f1	-0.154231	371.193	333.558
ENSMUSG00000002129.11	Sf3a1	-0.533699	370.878	256.196
ENSMUSG00000041879.13	Ipo9	-0.051256	370.788	357.846
ENSMUSG00000022312.11	Eif3h	-0.133289	370.626	337.918
ENSMUSG00000071054.12	Safb	0.309812	368.946	457.326
ENSMUSG00000045482.16	Trrap	-0.749512	368.402	219.127
ENSMUSG00000032458.6	Copb2	-0.0691718	367.696	350.483
ENSMUSG00000021318.15	Gli3	-1.17085	367.116	163.059
ENSMUSG00000026020.9	Nop58	0.22125	366.202	426.898
ENSMUSG00000029202.12	Pds5a	-1.26431	365.597	152.197
ENSMUSG00000027288.16	Zfp106	-1.9535	364.403	94.0852
ENSMUSG00000037851.13	Iars	-0.465273	361.324	261.719
ENSMUSG00000027002.13	Nckap1	-0.921819	361.303	190.711
ENSMUSG00000005683.8	Cs	0.39149	361.123	473.703
ENSMUSG00000031592.10	Pcm1	-0.630892	360.905	233.064
ENSMUSG00000045328.11	Cenpe	-0.447384	360.143	264.118
ENSMUSG00000052997.15	Uba2	0.25634	359.654	429.586
ENSMUSG00000090841.2	Myl6	-0.111559	359.198	332.469
ENSMUSG00000039262.16	Prrc2b	-1.92323	357.505	94.2614
ENSMUSG00000040084.9	Bub1b	-0.435287	357.074	264.073
ENSMUSG00000027593.15	Raly	0.468397	356.845	493.72
ENSMUSG00000007815.13	Rhoa	-0.322813	356.561	285.074
ENSMUSG00000022391.16	Rangap1	0.605658	355.741	541.321
ENSMUSG00000014195.15	Dnajc7	0.157589	354.778	395.727
ENSMUSG00000045962.16	Wnk1	-2.00226	354.376	88.455
ENSMUSG00000057738.13	Sptan1	0.22088	353.889	412.438
ENSMUSG00000033047.5	Eif3l	0.35652	353.307	452.351
ENSMUSG00000006699.17	Cdc42	-0.542644	352.498	241.994
ENSMUSG00000024661.7	Fth1	-0.973405	350.694	178.61
ENSMUSG00000028692.14	Akr1a1	-0.1762	350.184	309.923
ENSMUSG00000020737.12	Jpt1	-0.936832	349.868	182.763
ENSMUSG00000079641.3	Rpl39	-1.9989	349.842	87.5272
ENSMUSG00000023015.14	Racgap1	-0.0820731	349.719	330.379
ENSMUSG00000059263.9	Usp47	-0.453676	349.228	254.999
ENSMUSG00000027012.15	Dync1i2	0.0206946	348.947	353.988
ENSMUSG00000002477.5	Snrpd1	0.566652	347.887	515.25
ENSMUSG00000021488.8	Nsd1	-1.07483	347.019	164.739
ENSMUSG00000032199.13	Polr2m	-1.63392	346.879	111.768
ENSMUSG00000034681.17	Rnps1	-1.25914	346.298	144.681
ENSMUSG00000021832.8	Psmc6	0.200135	345.649	397.084
ENSMUSG00000005370.4	Msh6	-0.429453	345.404	256.478
ENSMUSG00000033228.8	Scaf11	-0.983347	344.076	174.035
ENSMUSG00000020863.15	Luc7l3	0.254156	343.123	409.222
ENSMUSG00000030796.17	Tead2	-1.16665	342.885	152.74
ENSMUSG00000016921.14	Srsf6	0.738801	342.753	571.983
ENSMUSG00000020321.15	Mdh1	0.495242	340.124	479.424
ENSMUSG00000037070.10	Rbmxl1	-1.32635	339.194	135.262
ENSMUSG00000032959.12	Pebp1	-0.398657	339.109	257.236
ENSMUSG00000054256.11	Msi1	0.363736	339.031	436.25
ENSMUSG00000007029.16	Vars	-0.153529	338.954	304.736
ENSMUSG00000028312.19	Smc2	-0.455582	338.877	247.115
ENSMUSG00000022982.10	Sod1	0.855426	338.751	612.899
ENSMUSG00000004897.16	Hdgf	-0.273737	337.567	279.226
ENSMUSG00000011752.7	Pgam1	0.26457	336.737	404.514
ENSMUSG00000036940.15	Kdm1a	-0.392357	336.651	256.489
ENSMUSG00000026750.6	Psmb7	0.619179	335.341	515.084
ENSMUSG00000026434.12	Nucks1	0.155247	335.3	373.394
ENSMUSG00000003435.9	Supt5	-0.732244	334.376	201.284
ENSMUSG00000029777.10	Gars	0.408506	334.136	443.502
ENSMUSG00000020075.8	Ddx21	-0.315674	334.015	268.373
ENSMUSG00000025066.10	Sfr1	-0.0387226	332.921	324.104
ENSMUSG00000020086.6	H2afy2	-0.0583094	331.996	318.845
ENSMUSG00000055762.16	Eef1d	0.570843	331.456	492.341
ENSMUSG00000053510.12	Nrd1	-0.501451	331.27	234.008
ENSMUSG00000027715.9	Ccna2	-0.151994	330.603	297.545
ENSMUSG00000061607.15	Mdc1	-0.580615	330.587	221.056
ENSMUSG00000021131.14	Erh	-0.491739	330.294	234.894
ENSMUSG00000023118.15	Sympk	-0.76742	330.286	194.032
ENSMUSG00000064356.3	mt-Atp8	-4.49768	330.201	14.6164
ENSMUSG00000020594.14	Pum2	-0.46539	329.124	238.377
ENSMUSG00000001833.17	2022-09-07	0.324533	328.529	411.403
ENSMUSG00000020250.10	Txnrd1	0.0147235	328.161	331.527
ENSMUSG00000018666.13	Cbx1	0.09468	328.161	350.419
ENSMUSG00000025369.15	Smarcc2	-1.23443	327.406	139.151
ENSMUSG00000024576.14	Csnk1a1	-0.157747	327.137	293.253
ENSMUSG00000053398.11	Phgdh	-1.00617	325.557	162.084
ENSMUSG00000027533.10	Fabp5	0.419365	325.541	435.358
ENSMUSG00000021577.14	Sdha	0.350611	325.307	414.799
ENSMUSG00000051855.15	Mest	-0.349318	325.23	255.291
ENSMUSG00000031029.6	Eif3f	0.607332	324.63	494.554
ENSMUSG00000018770.9	Atp5g3	0.3872	324.448	424.33
ENSMUSG00000041415.10	Dicer1	-1.20639	323.945	140.382
ENSMUSG00000020923.17	Ubtf	-0.305326	323.423	261.733
ENSMUSG00000020402.11	Vdac1	0.652311	323.062	507.751
ENSMUSG00000009470.17	Tnpo1	0.219034	322.492	375.366
ENSMUSG00000028851.6	Nudc	-0.279478	322.433	265.649
ENSMUSG00000003226.7	Ranbp2	-0.914053	322.377	171.083
ENSMUSG00000015120.15	Ube2i	-0.510514	321.46	225.656
ENSMUSG00000071646.9	Mta2	-0.586157	320.649	213.589
ENSMUSG00000027405.16	Nop56	-0.771787	320.556	187.747
ENSMUSG00000009013.5	Dynll1	-0.0934937	320.415	300.309
ENSMUSG00000013787.15	Ehmt2	-0.681316	319.752	199.396
ENSMUSG00000030603.16	Psmc4	0.658384	319.467	504.219
ENSMUSG00000014956.15	Ppp1cb	0.33185	318.881	401.352
ENSMUSG00000002524.17	Puf60	0.219394	318.84	371.208
ENSMUSG00000019471.10	Cdc37	0.295685	318.169	390.542
ENSMUSG00000031960.14	Aars	0.100754	316.588	339.488
ENSMUSG00000062203.15	Gspt1	0.47447	316.495	439.741
ENSMUSG00000031229.16	Atrx	-0.715596	316.116	192.5
ENSMUSG00000025781.14	Atp5c1	0.224815	315.528	368.734
ENSMUSG00000001175.15	Calm1	1.97591	314.613	1237.62
ENSMUSG00000053754.14	Chd8	-0.913245	314.375	166.93
ENSMUSG00000020708.12	Psmc5	0.528425	313.943	452.818
ENSMUSG00000052833.9	Sae1	0.586805	313.852	471.38
ENSMUSG00000117098.1	Gm49909	0.586673	313.488	470.79
ENSMUSG00000029106.14	Add1	0.0494281	313.352	324.274
ENSMUSG00000020180.10	Snrpd3	-0.177631	312.784	276.549
ENSMUSG00000045427.13	Hnrnph2	-0.600384	310.967	205.107
ENSMUSG00000042133.16	Ppig	-1.11194	310.861	143.826
ENSMUSG00000005846.12	Rsl1d1	-0.401911	310.666	235.129
ENSMUSG00000066036.14	Ubr4	-0.550185	309.114	211.104
ENSMUSG00000062006.12	Rpl34	-0.782457	308.961	179.623
ENSMUSG00000027404.15	Snrpb	0.390087	308.93	404.844
ENSMUSG00000046865.7	Fbl	-0.155206	308.58	277.106
ENSMUSG00000025580.15	Eif4a3	0.613857	308.263	471.748
ENSMUSG00000038502.17	Ptov1	0.729397	308.168	510.925
ENSMUSG00000061613.13	U2af1	-0.686589	308.065	191.408
ENSMUSG00000022205.15	Sub1	0.965216	307.947	601.222
ENSMUSG00000007670.10	Khsrp	0.142713	307.92	339.937
ENSMUSG00000005698.15	Ctcf	-0.754945	307.773	182.377
ENSMUSG00000042688.16	Mapk6	-1.96769	306.521	78.3657
ENSMUSG00000038943.16	Prc1	0.00715028	306.434	307.956
ENSMUSG00000056342.16	Usp34	-1.90724	306.265	81.6507
ENSMUSG00000022141.7	Nipbl	-1.65286	305.682	97.2094
ENSMUSG00000027566.15	Psma7	0.678325	305.667	489.153
ENSMUSG00000032228.16	Tcf12	-1.16091	305	136.405
ENSMUSG00000015176.11	Nolc1	-0.911159	304.913	162.14
ENSMUSG00000026341.16	Actr3	-0.727333	304.6	183.984
ENSMUSG00000060739.8	Nsa2	-2.51612	303.835	53.1141
ENSMUSG00000002052.6	Supt6	-0.621276	303.185	197.1
ENSMUSG00000020994.5	Pnn	-0.425721	302.959	225.543
ENSMUSG00000024660.9	Incenp	-0.529145	302.828	209.849
ENSMUSG00000028800.15	Hdac1	-0.553216	302.344	206.047
ENSMUSG00000024474.7	Ik	0.35824	302.243	387.433
ENSMUSG00000073676.4	Hspe1	-0.130227	301.897	275.84
ENSMUSG00000021144.14	Mta1	-1.27013	301.817	125.14
ENSMUSG00000031701.6	Dnaja2	0.518948	301.376	431.844
ENSMUSG00000028760.16	Eif4g3	-1.61461	300.723	98.2019
ENSMUSG00000063015.12	Ccni	-3.96652	300.462	19.2197
ENSMUSG00000024054.14	Smchd1	-0.386454	300.3	229.732
ENSMUSG00000006740.14	Kif5b	0.0344317	300.168	307.418
ENSMUSG00000024587.10	Nars	0.231514	299.644	351.802
ENSMUSG00000033581.17	Igf2bp2	-0.347104	299.553	235.496
ENSMUSG00000024360.8	Etf1	-0.0246877	299.317	294.238
ENSMUSG00000031134.16	Rbmx	-0.256424	298.297	249.723
ENSMUSG00000063273.11	Naa15	0.028763	297.857	303.855
ENSMUSG00000028431.11	Elp1	0.192435	297.636	340.106
ENSMUSG00000055204.15	Ankrd17	-0.521459	296.577	206.615
ENSMUSG00000021024.14	Psma6	0.52838	296.412	427.517
ENSMUSG00000037313.16	Tacc3	0.164013	296.257	331.926
ENSMUSG00000028759.13	Hp1bp3	-0.868549	295.801	162.009
ENSMUSG00000038762.15	Abcf1	-0.637474	295.598	190.021
ENSMUSG00000019923.14	Zwint	0.607004	294.969	449.266
ENSMUSG00000044627.11	Swi5	0.412098	294.803	392.27
ENSMUSG00000028906.16	Epb41	-0.187352	294.701	258.811
ENSMUSG00000027597.15	Ahcy	-1.16531	294.369	131.25
ENSMUSG00000057322.12	Rpl38	0.535385	293.797	425.809
ENSMUSG00000000751.13	Rpa1	0.357946	293.517	376.172
ENSMUSG00000001729.14	Akt1	-1.27038	293.232	121.56
ENSMUSG00000038759.15	Nup205	-0.20745	293.212	253.941
ENSMUSG00000023832.14	Acat2	-0.319073	292.589	234.535
ENSMUSG00000022962.15	Gart	0.0265304	292.295	297.72
ENSMUSG00000034269.12	Setd5	-2.09075	291.689	68.4764
ENSMUSG00000061032.9	Rrp1	-0.0684857	291.358	277.851
ENSMUSG00000042207.17	Kdm5b	-0.207088	290.982	252.073
ENSMUSG00000031799.10	Tpm4	0.388426	290.692	380.506
ENSMUSG00000019179.10	Mdh2	0.848269	290.641	523.253
ENSMUSG00000035152.14	Ap2b1	-0.0331948	289.847	283.254
ENSMUSG00000021500.17	Ddx46	-0.047229	288.611	279.316
ENSMUSG00000032407.14	U2surp	-0.906339	288.529	153.941
ENSMUSG00000035247.16	Hectd1	-0.570418	288.264	194.123
ENSMUSG00000022956.11	Atp5o	0.984284	287.424	568.62
ENSMUSG00000034610.14	Tut4	-1.3425	286.474	112.967
ENSMUSG00000033307.7	Mif	0.971919	286.145	561.258
ENSMUSG00000027201.16	Myef2	-0.492213	285.767	203.161
ENSMUSG00000058230.12	Arhgap35	-1.42339	285.605	106.484
ENSMUSG00000029004.15	Kmt2e	-2.97818	285.498	36.2312
ENSMUSG00000023110.12	Prmt5	-0.199097	285.466	248.668
ENSMUSG00000020167.14	Tcf3	-0.851637	285.429	158.172
ENSMUSG00000024498.16	Tcerg1	-0.677876	285.053	178.182
ENSMUSG00000021244.15	Ylpm1	-1.31289	284.949	114.696
ENSMUSG00000020362.13	Cnot6	-1.77841	284.907	83.0518
ENSMUSG00000011257.19	Pabpc4	-2.89896	284.519	38.145
ENSMUSG00000025862.14	Stag2	-0.484539	284.374	203.25
ENSMUSG00000022443.17	Myh9	0.731195	284.302	471.946
ENSMUSG00000028138.8	Adh5	0.304358	284.274	351.041
ENSMUSG00000028649.19	Macf1	-1.47149	283.98	102.406
ENSMUSG00000030216.12	Wbp11	-1.03031	283.332	138.721
ENSMUSG00000004364.14	Cul3	-0.515567	283.033	197.987
ENSMUSG00000032582.14	Rbm6	-1.60283	282.884	93.1339
ENSMUSG00000058355.8	Abce1	-0.159655	282.352	252.773
ENSMUSG00000003360.15	Ddx23	-0.535562	282.251	194.722
ENSMUSG00000057863.6	Rpl36	-1.38257	282.044	108.174
ENSMUSG00000027479.14	Mapre1	0.228818	282.038	330.513
ENSMUSG00000056999.15	Ide	0.0557351	281.932	293.037
ENSMUSG00000038429.10	Usp5	-0.0651476	281.861	269.416
ENSMUSG00000018286.6	Psmb6	0.736442	281.564	469.102
ENSMUSG00000064302.13	Clasp1	-0.376023	281.413	216.845
ENSMUSG00000031540.13	Kat6a	-1.75066	281.263	83.5816
ENSMUSG00000030516.14	Tjp1	-0.588433	281.086	186.941
ENSMUSG00000027699.19	Ect2	-0.558155	280.988	190.839
ENSMUSG00000025950.16	Idh1	0.00946605	279.866	281.708
ENSMUSG00000041530.16	Ago1	-1.36962	279.789	108.277
ENSMUSG00000028556.15	Dock7	-0.561912	279.63	189.423
ENSMUSG00000053907.10	Mat2a	0.0865864	279.416	296.699
ENSMUSG00000027823.9	Gmps	0.219271	278.901	324.681
ENSMUSG00000028902.4	Sf3a3	0.417518	278.859	372.452
ENSMUSG00000061136.14	Prpf40a	-0.301811	278.818	226.187
ENSMUSG00000024613.16	Tcof1	-1.19725	278.344	121.387
ENSMUSG00000029713.15	Gnb2	0.740361	277.718	463.954
ENSMUSG00000003779.16	Kif20a	0.180535	277.388	314.365
ENSMUSG00000068739.13	Sars	0.108079	277.072	298.626
ENSMUSG00000029062.14	Cdk11b	-0.711001	276.906	169.161
ENSMUSG00000036768.6	Kif15	-0.133395	276.337	251.932
ENSMUSG00000028656.14	Cap1	0.435096	276.121	373.316
ENSMUSG00000092232.1	Gm20521	-0.922822	275.592	145.368
ENSMUSG00000032301.13	Psma4	-0.386717	275.529	210.744
ENSMUSG00000028367.5	Txn1	1.0673	275.232	576.75
ENSMUSG00000040204.6	Pclaf	-0.854207	275.149	152.204
ENSMUSG00000062078.15	Qk	0.410336	275.145	365.666
ENSMUSG00000048076.14	Arf1	0.263787	274.911	330.065
ENSMUSG00000031818.12	Cox4i1	0.924074	274.893	521.601
ENSMUSG00000021945.9	Zmym2	-0.738921	274.677	164.583
ENSMUSG00000022536.14	Glyr1	0.0312109	274.632	280.638
ENSMUSG00000035569.17	Ankrd11	-2.23054	274.315	58.4508
ENSMUSG00000024165.9	Jpt2	0.0709215	274.183	287.998
ENSMUSG00000041638.18	Gcn1l1	-0.513266	273.582	191.681
ENSMUSG00000052533.14	Nup188	-0.453264	273.343	199.646
ENSMUSG00000012535.14	Tnpo3	-0.618671	273.207	177.931
ENSMUSG00000004885.5	Crabp2	1.12937	273.085	597.41
ENSMUSG00000022194.15	Pabpn1	-0.198038	272.941	237.933
ENSMUSG00000032777.9	Gtf3c1	-0.20833	272.801	236.12
ENSMUSG00000055531.12	Cpsf6	0.393098	272.434	357.763
ENSMUSG00000022629.17	Kif21a	-1.09324	271.839	127.413
ENSMUSG00000031068.8	Glrx3	0.120313	271.276	294.869
ENSMUSG00000038664.16	Herc1	-1.16382	271.128	121.012
ENSMUSG00000028330.8	Ncbp1	0.0298099	271.111	276.771
ENSMUSG00000025332.14	Kdm5c	-0.628358	270.85	175.216
ENSMUSG00000024073.16	Birc6	-0.246057	270.316	227.93
ENSMUSG00000034675.17	Dbn1	-0.162644	269.632	240.886
ENSMUSG00000061887.14	Ssbp3	-0.980349	269.594	136.645
ENSMUSG00000024271.8	Elp2	0.285062	269.364	328.21
ENSMUSG00000010277.7	2610507B11Rik	-3.56967	267.513	22.5303
ENSMUSG00000016018.4	Mtrex	-0.205701	267.354	231.827
ENSMUSG00000055436.18	Srsf11	0.322955	267.085	334.095
ENSMUSG00000021109.13	Hif1a	0.113474	266.692	288.516
ENSMUSG00000020612.16	Prkar1a	0.778325	266.59	457.239
ENSMUSG00000034252.14	Senp6	-1.47077	266.108	96.0088
ENSMUSG00000025001.11	Hells	0.0316642	265.734	271.631
ENSMUSG00000067150.6	Xpo5	0.262513	265.634	318.645
ENSMUSG00000024151.13	Msh2	-0.0309941	265.592	259.947
ENSMUSG00000034566.10	Atp5h	0.391937	265.366	348.201
ENSMUSG00000020069.16	Hnrnph3	0.589151	264.578	398.02
ENSMUSG00000023495.13	Pcbp4	-0.163446	263.809	235.553
ENSMUSG00000018548.15	Trim37	-1.35371	263.623	103.152
ENSMUSG00000008690.15	Ncaph2	-1.50064	263.34	93.0638
ENSMUSG00000029121.16	Crmp1	-0.235028	263.098	223.546
ENSMUSG00000028960.19	Ube4b	-0.167573	262.188	233.436
ENSMUSG00000040383.16	Aqr	-0.60279	262.088	172.579
ENSMUSG00000039477.16	Tnrc18	-1.83514	261.973	73.4215
ENSMUSG00000032050.17	Rdx	0.0433788	261.909	269.904
ENSMUSG00000035960.14	Apex1	0.408961	261.707	347.476
ENSMUSG00000020547.5	Bzw2	-0.138989	261.444	237.432
ENSMUSG00000030246.11	Ldhb	0.552627	261.349	383.334
ENSMUSG00000032097.10	Ddx6	-0.598661	261.338	172.579
ENSMUSG00000021807.6	Rtraf	0.126179	260.907	284.754
ENSMUSG00000029629.17	Phf14	-0.83574	260.697	146.067
ENSMUSG00000117748.1	Chtf8	-1.82436	260.449	73.5418
ENSMUSG00000028932.7	Psmc2	0.158545	259.252	289.367
ENSMUSG00000059248.13	2022-09-09	0.158654	259.221	289.354
ENSMUSG00000071072.12	Ptges3	1.15278	259.134	576.164
ENSMUSG00000015222.17	Map2	-0.0265346	259.113	254.391
ENSMUSG00000029817.11	Tra2a	0.638983	258.626	402.741
ENSMUSG00000001783.3	Rtcb	0.222418	258.56	301.659
ENSMUSG00000029405.16	G3bp2	0.507753	257.634	366.313
ENSMUSG00000036893.17	Ehmt1	-0.497096	257.547	182.48
ENSMUSG00000063694.5	Cycs	-2.81727	257.343	36.5115
ENSMUSG00000020536.12	Llgl1	-0.546622	257.29	176.146
ENSMUSG00000024002.18	Brd4	-1.19643	256.438	111.897
ENSMUSG00000027433.5	Xrn2	-0.644593	256.314	163.957
ENSMUSG00000020048.13	Hsp90b1	0.0563238	256.279	266.482
ENSMUSG00000019370.10	Calm3	0.53462	255.336	369.869
ENSMUSG00000049804.9	Armcx4	-2.19838	254.721	55.4991
ENSMUSG00000041571.9	Selenow	-0.299868	254.654	206.862
ENSMUSG00000063077.14	Kif1b	-0.0996255	254.363	237.39
ENSMUSG00000021709.14	Erbin	-1.55624	253.985	86.364
ENSMUSG00000035133.9	Arhgap5	-1.12005	253.506	116.632
ENSMUSG00000066568.12	Lsm14a	-0.569207	253.206	170.658
ENSMUSG00000025503.5	Taldo1	-0.0184425	253.173	249.957
ENSMUSG00000019817.18	Plagl1	-0.762552	251.901	148.484
ENSMUSG00000028798.16	Eif3i	0.772302	251.635	429.79
ENSMUSG00000028953.10	Abcf2	-0.113553	251.327	232.304
ENSMUSG00000030122.12	Ptms	1.41699	251.276	670.975
ENSMUSG00000078578.9	Ube2d3	-1.17072	250.999	111.494
ENSMUSG00000015671.11	Psma2	-0.43959	250.074	184.39
ENSMUSG00000019874.11	Fabp7	0.604135	249.244	378.867
ENSMUSG00000027671.14	Actl6a	0.506619	249.009	353.772
ENSMUSG00000028745.18	Capzb	0.649257	248.998	390.519
ENSMUSG00000020840.10	Blmh	0.356483	248.903	318.671
ENSMUSG00000030779.16	Rbbp6	-1.60923	248.464	81.4399
ENSMUSG00000025223.15	Ldb1	-0.378006	248.459	191.189
ENSMUSG00000026918.16	Brd3	-0.971689	248.219	126.569
ENSMUSG00000024811.11	Tnks2	-0.989827	247.855	124.804
ENSMUSG00000030867.7	Plk1	-0.390101	247.406	188.79
ENSMUSG00000029505.17	Ep400	-1.51019	247.138	86.7614
ENSMUSG00000019942.13	Cdk1	0.977802	247.034	486.523
ENSMUSG00000021413.9	Prpf4b	-0.762626	246.902	145.529
ENSMUSG00000034674.18	Tdg	-1.4666	246.652	89.2474
ENSMUSG00000062683.11	Atp5g2	-1.09162	246.636	115.73
ENSMUSG00000020705.6	Ddx42	-0.471668	246.453	177.725
ENSMUSG00000042323.17	Pbrm1	-0.752006	246.424	146.321
ENSMUSG00000027193.12	Api5	-0.562417	246.247	166.75
ENSMUSG00000020745.15	Pafah1b1	0.457156	245.132	336.525
ENSMUSG00000032637.15	Atxn2l	-0.613966	244.549	159.788
ENSMUSG00000030016.14	Zfp638	-1.13942	244.222	110.863
ENSMUSG00000006398.15	Cdc20	0.395381	244.163	321.146
ENSMUSG00000029147.11	Ppm1g	-0.000932848	243.902	243.744
ENSMUSG00000029191.16	Rfc1	-1.03056	243.496	119.197
ENSMUSG00000010097.15	Nxf1	-0.308411	243.492	196.627
ENSMUSG00000030224.10	Strap	0.469231	242.906	336.272
ENSMUSG00000066979.6	Bub3	0.683561	242.846	390.035
ENSMUSG00000000184.12	Ccnd2	1.83475	242.828	866.19
ENSMUSG00000008892.12	Vdac3	-0.611213	242.475	158.735
ENSMUSG00000038374.10	Rbm8a	0.215604	242.362	281.428
ENSMUSG00000021039.9	Snw1	0.0755185	242.155	255.169
ENSMUSG00000038965.17	Ube2l3	-2.80345	241.968	34.6606
ENSMUSG00000027306.15	Nusap1	-0.117865	241.888	222.912
ENSMUSG00000017478.15	Zc3h18	-0.726843	241.697	146.039
ENSMUSG00000044791.16	Setd2	-1.43683	241.399	89.1674
ENSMUSG00000042446.16	Zmym4	-0.977743	241.398	122.575
ENSMUSG00000027455.16	Nsfl1c	-0.155848	240.741	216.09
ENSMUSG00000021279.5	Cdc42bpb	-1.08266	240.621	113.611
ENSMUSG00000020267.6	Hint1	0.0617259	240.263	250.766
ENSMUSG00000027170.12	Eif3m	0.539295	240.149	348.999
ENSMUSG00000055612.15	Cdca7	0.194608	239.945	274.596
ENSMUSG00000030541.16	Idh2	0.590603	239.44	360.567
ENSMUSG00000024908.15	Ppp6r3	-0.28683	239.309	196.162
ENSMUSG00000027680.15	Fxr1	0.156773	239.075	266.519
ENSMUSG00000046432.12	Bex3	-0.0276024	238.878	234.351
ENSMUSG00000068036.15	Afdn	-0.719563	238.669	144.94
ENSMUSG00000033237.19	Arid2	-1.35387	238.617	93.3566
ENSMUSG00000053565.10	Eif3k	0.878855	238.56	438.692
ENSMUSG00000030751.18	Psma1	0.588762	238.411	358.56
ENSMUSG00000021486.7	Prelid1	-2.18769	237.001	52.0225
ENSMUSG00000038482.11	Tfdp1	-2.06857	236.934	56.484
ENSMUSG00000020935.8	Dcakd	1.34692	236.796	602.334
ENSMUSG00000106864.3	Gtf3c2	-0.966354	236.765	121.176
ENSMUSG00000031672.8	Got2	-0.491343	236.723	168.396
ENSMUSG00000028156.12	Eif4e	-0.664815	236.656	149.276
ENSMUSG00000024095.15	Hnrnpll	0.283052	236.518	287.787
ENSMUSG00000078941.9	Ak6	-0.633324	236.312	152.348
ENSMUSG00000020089.8	Ppa1	-0.157295	236.296	211.888
ENSMUSG00000001441.13	Npepps	-0.387147	236.219	180.623
ENSMUSG00000037601.11	Nme1	1.03835	236.088	484.896
ENSMUSG00000004530.12	Coro1c	0.162117	236.076	264.152
ENSMUSG00000018326.9	Ywhab	1.0226	236.025	479.501
ENSMUSG00000022678.16	Nde1	-0.395457	235.954	179.384
ENSMUSG00000070319.6	Eif3g	0.851341	235.782	425.393
ENSMUSG00000024012.18	Mtch1	-0.0258917	235.618	231.427
ENSMUSG00000032479.15	Map4	-0.427934	235.332	174.928
ENSMUSG00000029823.16	Luc7l2	0.433225	234.081	316.067
ENSMUSG00000049532.11	Sall2	-0.701171	233.944	143.892
ENSMUSG00000005625.15	Psmd4	0.740484	233.862	390.722
ENSMUSG00000014226.10	Cacybp	-0.308492	233.667	188.682
ENSMUSG00000024968.14	Rcor2	-0.293415	233.625	190.63
ENSMUSG00000031078.15	Cttn	-0.356828	233.589	182.405
ENSMUSG00000020608.7	Smc6	-0.809773	232.762	132.784
ENSMUSG00000034403.16	Pja1	-0.0748073	232.653	220.896
ENSMUSG00000026356.15	Dars	0.207439	232.496	268.448
ENSMUSG00000001472.17	Tcf25	-0.540145	232.488	159.883
ENSMUSG00000021012.16	Zc3h14	-1.31194	232.304	93.5675
ENSMUSG00000023852.14	Chd1	-0.727123	231.854	140.065
ENSMUSG00000058672.7	Tubb2a	1.79949	231.291	805.116
ENSMUSG00000025487.15	Psmd13	0.456358	231.271	317.321
ENSMUSG00000007039.12	Ddah2	0.291626	231.067	282.83
ENSMUSG00000059552.13	Trp53	-0.105288	231.032	214.772
ENSMUSG00000022201.16	Zfr	-0.44321	230.283	169.372
ENSMUSG00000033326.15	Kdm4a	-0.2773	229.989	189.771
ENSMUSG00000020661.15	Dnmt3a	-0.705906	229.815	140.89
ENSMUSG00000038369.14	Ncoa6	-2.26965	229.673	47.6299
ENSMUSG00000059878.12	Zfp422	-1.20993	229.646	99.2736
ENSMUSG00000021037.7	Ahsa1	0.395844	229.319	301.717
ENSMUSG00000027091.14	Zc3h15	-0.166308	229.062	204.122
ENSMUSG00000025134.2	Alyref	1.90536	229.012	857.88
ENSMUSG00000052707.8	Tnrc6a	-2.28684	228.97	46.9213
ENSMUSG00000022957.20	Itsn1	-1.42349	228.239	85.0893
ENSMUSG00000040681.16	Hmgn1	-0.328924	228.212	181.686
ENSMUSG00000025220.8	Oga	-0.360931	227.974	177.514
ENSMUSG00000031575.18	Ash2l	-0.258398	227.961	190.579
ENSMUSG00000038014.7	Fam120a	-1.67603	227.914	71.3242
ENSMUSG00000026491.13	Ahctf1	-0.930226	227.652	119.466
ENSMUSG00000039419.17	Cntnap2	-0.678434	226.942	141.803
ENSMUSG00000026915.16	Strbp	-0.829105	226.577	127.535
ENSMUSG00000044783.16	Hjurp	-0.758609	226.572	133.919
ENSMUSG00000022010.19	Tsc22d1	-0.0350836	226.352	220.914
ENSMUSG00000031826.20	Usp10	-0.584364	226.312	150.937
ENSMUSG00000017428.16	Psmd11	-0.120662	226.265	208.111
ENSMUSG00000020978.10	Klhdc2	-0.180003	226.103	199.582
ENSMUSG00000027018.11	Hat1	0.350255	225.787	287.83
ENSMUSG00000028433.14	Ubap2	-0.653065	225.756	143.564
ENSMUSG00000038256.15	Bcl9	-2.18355	225.719	49.6884
ENSMUSG00000022390.11	Zc3h7b	-1.3383	225.131	89.0367
ENSMUSG00000022607.17	Ptk2	-0.987636	224.666	113.3
ENSMUSG00000028676.17	Srsf10	-0.153105	223.977	201.425
ENSMUSG00000029705.17	Cux1	-1.33172	223.887	88.9492
ENSMUSG00000003868.14	Ruvbl2	0.222281	223.218	260.401
ENSMUSG00000068749.9	Psma5	-0.742232	223.119	133.384
ENSMUSG00000031954.6	Cfdp1	-0.103705	223.074	207.601
ENSMUSG00000036202.16	Rif1	-0.717581	222.935	135.57
ENSMUSG00000020720.13	Psmd12	0.260551	222.921	267.045
ENSMUSG00000033712.6	Ccar2	-0.23041	222.592	189.735
ENSMUSG00000034021.15	Pds5b	-0.487325	222.534	158.744
ENSMUSG00000028961.15	Pgd	0.280384	222.508	270.24
ENSMUSG00000001403.13	Ube2c	0.863538	222.505	404.846
ENSMUSG00000034022.8	Cpsf1	-0.674329	222.488	139.416
ENSMUSG00000022241.6	Tars	-0.297822	221.785	180.417
ENSMUSG00000021262.15	Evl	-2.96138	221.672	28.4609
ENSMUSG00000036667.14	Tcaf1	0.00428194	221.601	222.259
ENSMUSG00000023932.9	Cdc5l	-1.04536	221.519	107.331
ENSMUSG00000031696.9	Vps35	0.233629	221.359	260.271
ENSMUSG00000036751.7	Cox6b1	0.175374	221.354	249.965
ENSMUSG00000074698.10	Csnk2a1	-0.813031	221.327	125.976
ENSMUSG00000036591.16	Arhgap21	-2.09694	221.321	51.7345
ENSMUSG00000028964.14	Park7	0.476268	221.102	307.584
ENSMUSG00000021811.7	Dnajc9	0.863	220.975	401.912
ENSMUSG00000050812.18	Ecpas	-0.502876	220.859	155.86
ENSMUSG00000060073.9	Psma3	-0.226911	220.603	188.497
ENSMUSG00000027968.11	Larp7	-0.975624	220.349	112.052
ENSMUSG00000031665.7	Sall1	-1.19364	219.671	96.0401
ENSMUSG00000009575.14	Cbx5	1.32642	219.437	550.302
ENSMUSG00000034120.18	Srsf2	1.63867	219.224	682.617
ENSMUSG00000095567.8	Noc2l	-0.0194691	219.198	216.26
ENSMUSG00000042548.14	Asxl1	-1.29389	218.874	89.268
ENSMUSG00000028580.15	Pum1	-0.33644	218.86	173.335
ENSMUSG00000007817.15	Zmiz1	-0.86964	218.811	119.752
ENSMUSG00000000902.13	Smarcb1	0.740498	218.696	365.387
ENSMUSG00000021595.18	Nsun2	-0.304992	218.686	177.015
ENSMUSG00000027379.13	Bub1	-1.65894	218.292	69.127
ENSMUSG00000092035.8	Peg10	0.140938	218.173	240.563
ENSMUSG00000101678.3	Gm29609	-0.906202	218.16	116.407
ENSMUSG00000020532.18	Acaca	-0.916679	218.159	115.565
ENSMUSG00000050148.9	Ubqln2	0.848789	218.11	392.814
ENSMUSG00000024483.19	Ankhd1	-0.63161	218.078	140.76
ENSMUSG00000032803.15	Cdv3	-0.327284	217.964	173.725
ENSMUSG00000015697.14	Setdb1	-0.591175	217.525	144.394
ENSMUSG00000052337.15	Immt	-0.0725952	217.516	206.842
ENSMUSG00000030677.8	Kif22	0.123521	217.511	236.954
ENSMUSG00000029814.10	Igf2bp3	0.0222763	217.428	220.811
ENSMUSG00000023018.5	Smarcd1	-0.0523851	217.228	209.481
ENSMUSG00000026473.16	Glul	-0.435111	217.149	160.612
ENSMUSG00000049751.6	Rpl36al	-0.84438	217.066	120.895
ENSMUSG00000021116.10	Eif2s1	-0.238227	217.042	184.006
ENSMUSG00000014769.10	Psmb1	1.09967	216.949	464.935
ENSMUSG00000026790.19	Odf2	-0.46537	216.886	157.087
ENSMUSG00000105204.1	Gm43738	-0.481853	216.545	155.058
ENSMUSG00000042700.16	Sipa1l1	-2.55493	216.48	36.839
ENSMUSG00000038611.17	Phrf1	-1.07897	216.37	102.422
ENSMUSG00000017221.14	Psmd3	0.328908	216.28	271.661
ENSMUSG00000007411.16	Mark3	-1.15778	216.202	96.9018
ENSMUSG00000018567.14	Gabarap	0.469699	216.113	299.278
ENSMUSG00000030058.17	Copg1	0.0507145	216.082	223.813
ENSMUSG00000074781.5	Ube2n	-1.50595	215.99	76.0495
ENSMUSG00000057335.11	Cep170	-0.595977	215.701	142.707
ENSMUSG00000039067.5	Psmd7	0.323059	215.591	269.7
ENSMUSG00000035901.14	Dennd5a	-2.43643	215.564	39.8232
ENSMUSG00000091537.2	Tma7	-2.38426	215.46	41.2696
ENSMUSG00000032612.14	Usp4	-0.348692	214.906	168.765
ENSMUSG00000032118.16	Fez1	0.150906	214.84	238.529
ENSMUSG00000039735.15	Fnbp1l	-0.129778	214.611	196.149
ENSMUSG00000030884.12	Uqcrc2	0.441353	214.541	291.32
ENSMUSG00000038416.15	Cdc16	-0.28979	214.525	175.486
ENSMUSG00000002835.9	Chaf1a	-0.808943	214.483	122.427
ENSMUSG00000013921.15	Clip3	0.0468018	214.03	221.087
ENSMUSG00000004535.12	Tax1bp1	-0.453221	213.916	156.246
ENSMUSG00000038545.13	Cul7	-0.53013	213.913	148.133
ENSMUSG00000024767.11	Otub1	0.750197	213.371	358.894
ENSMUSG00000048874.15	Phf3	-1.24857	212.923	89.612
ENSMUSG00000075592.10	Nynrin	-0.703646	212.807	130.668
ENSMUSG00000053470.13	Kdm3a	-0.530137	212.687	147.283
ENSMUSG00000054405.14	Dnajc8	-0.35333	212.6	166.418
ENSMUSG00000032212.10	Sltm	-0.623093	212.52	137.985
ENSMUSG00000002833.11	Hdgfl2	0.00708682	212.453	213.499
ENSMUSG00000060860.8	Ube2s	0.12479	212.123	231.288
ENSMUSG00000020152.7	Actr2	0.823515	211.414	374.142
ENSMUSG00000031403.14	Dkc1	-0.236703	210.825	178.924
ENSMUSG00000059409.9	Ppp2r5d	-0.226611	210.783	180.143
ENSMUSG00000061479.15	Snrpa	-0.552468	210.579	143.584
ENSMUSG00000042557.14	Sin3a	-0.783624	210.503	122.282
ENSMUSG00000000131.15	Xpo6	-1.67448	209.91	65.7606
ENSMUSG00000021877.12	Arf4	1.12767	209.849	458.532
ENSMUSG00000026914.15	Psmd14	0.804207	209.413	365.673
ENSMUSG00000055024.12	Ep300	-1.4694	209.392	75.6183
ENSMUSG00000019373.11	Cops3	0.0310771	209.137	213.691
ENSMUSG00000028633.7	Ctps	-0.122728	209.126	192.071
ENSMUSG00000032939.14	Nup93	0.526436	208.995	301.03
ENSMUSG00000002265.16	Peg3	-0.312397	208.746	168.103
ENSMUSG00000027770.5	Dhx36	-0.0834675	208.727	196.994
ENSMUSG00000006304.14	Arpc2	0.348083	208.322	265.166
ENSMUSG00000032096.16	Arcn1	-0.282089	207.833	170.921
ENSMUSG00000043384.15	Gprasp1	-0.569754	207.818	140.014
ENSMUSG00000033737.14	Fndc3c1	-1.38304	207.803	79.6737
ENSMUSG00000039128.13	Cdc123	0.190476	207.48	236.763
ENSMUSG00000049401.10	Ogfr	-0.450333	207.441	151.821
ENSMUSG00000090553.8	Snrpe	0.927819	206.917	393.638
ENSMUSG00000030138.8	Bms1	-0.652942	206.904	131.587
ENSMUSG00000039367.11	Sec24c	-0.506334	206.695	145.515
ENSMUSG00000027304.9	Rtf1	-0.541109	206.622	141.999
ENSMUSG00000007080.14	Pole	-0.320985	206.331	165.172
ENSMUSG00000039221.10	Rpl22l1	-0.0945809	206.237	193.15
ENSMUSG00000037197.11	Rbm17	-0.832354	206.165	115.785
ENSMUSG00000059743.12	Fdps	-0.370712	206.052	159.361
ENSMUSG00000052397.8	Ezr	0.169982	206.022	231.783
ENSMUSG00000002957.11	Ap2a2	-0.279064	206.001	169.77
ENSMUSG00000024501.20	Dpysl3	0.186551	205.519	233.888
ENSMUSG00000070348.5	Ccnd1	1.48051	205.438	573.268
ENSMUSG00000013415.9	Igf2bp1	1.23754	205.012	483.411
ENSMUSG00000031060.16	Rbm10	-1.83123	204.974	57.6027
ENSMUSG00000070923.4	Klhl9	0.589103	204.918	308.261
ENSMUSG00000040720.15	Virma	-0.256172	204.838	171.512
ENSMUSG00000025651.14	Uqcrc1	0.782415	204.676	352.045
ENSMUSG00000038773.11	Kdm3b	-0.927932	204.625	107.553
ENSMUSG00000037331.15	Larp1	-1.43858	204.302	75.3732
ENSMUSG00000024640.9	Psat1	0.641572	204.172	318.514
ENSMUSG00000068856.3	Sf3b4	-0.79227	204.11	117.86
ENSMUSG00000056758.14	Hmga2	-0.88802	204.085	110.278
ENSMUSG00000027206.13	Cops2	-0.368333	204.084	158.099
ENSMUSG00000035325.16	Sec31a	-0.286382	204.041	167.305
ENSMUSG00000028409.11	Smu1	0.700249	203.891	331.28
ENSMUSG00000021771.14	Vdac2	0.27071	203.571	245.588
ENSMUSG00000024826.15	Dpf2	-0.0480251	203.283	196.628
ENSMUSG00000027933.11	Ints3	-0.478614	203.258	145.871
ENSMUSG00000014402.15	Tsg101	-0.825438	203.097	114.61
ENSMUSG00000039148.5	Sart1	0.110909	202.946	219.163
ENSMUSG00000032293.8	Ireb2	-0.617611	202.657	132.082
ENSMUSG00000015932.8	Dstn	0.916896	202.655	382.622
ENSMUSG00000017778.14	Cox7c	-1.34045	202.584	79.9998
ENSMUSG00000026701.15	Prdx6	-0.156043	202.141	181.419
ENSMUSG00000000441.17	Raf1	-1.58508	202.058	67.347
ENSMUSG00000028180.18	Zranb2	-0.0824441	202.031	190.81
ENSMUSG00000022995.16	Enah	-0.454626	201.485	147.024
ENSMUSG00000040667.11	Nup88	-0.316377	201.474	161.801
ENSMUSG00000008373.16	Prpf31	-0.0363844	201.002	195.996
ENSMUSG00000040407.18	Akap9	-1.36756	200.933	77.8705
ENSMUSG00000008450.8	Nutf2	-1.21902	200.679	86.2066
ENSMUSG00000039361.11	Picalm	-0.257049	200.628	167.885
ENSMUSG00000021901.10	Bap1	-1.68799	200.615	62.2629
ENSMUSG00000024050.17	Wiz	-1.30198	200.32	81.2432
ENSMUSG00000022106.14	Rcbtb2	0.0220335	200.209	203.29
ENSMUSG00000031865.16	Dctn1	-0.032413	200.113	195.667
ENSMUSG00000063882.12	Uqcrh	0.726251	199.996	330.86
ENSMUSG00000006299.13	Aamp	0.649438	199.561	313.023
ENSMUSG00000020456.17	Ogdh	-0.294765	199.462	162.602
ENSMUSG00000040565.8	Btaf1	-0.237639	199.456	169.165
ENSMUSG00000006673.14	Qrich1	-0.185998	198.966	174.899
ENSMUSG00000022702.16	Hira	-2.05069	198.955	48.0214
ENSMUSG00000018965.11	Ywhah	0.4419	198.8	270.049
ENSMUSG00000063904.4	Dpp3	0.068047	198.677	208.273
ENSMUSG00000037286.15	Stag1	-0.509876	198.653	139.511
ENSMUSG00000029478.16	Ncor2	-1.46737	198.443	71.7652
ENSMUSG00000074994.5	Qser1	-1.81428	198.388	56.4111
ENSMUSG00000051391.9	Ywhag	1.58428	198.192	594.295
ENSMUSG00000004264.17	Phb2	0.439489	198.146	268.711
ENSMUSG00000003810.12	Mast2	-2.78177	197.842	28.7688
ENSMUSG00000029223.12	Uchl1	1.36458	197.706	509.095
ENSMUSG00000074884.12	Serf2	-0.209364	197.579	170.89
ENSMUSG00000020457.13	Drg1	0.260185	197.355	236.358
ENSMUSG00000028788.14	Ptp4a2	-3.22442	196.774	21.0533
ENSMUSG00000026842.16	Abl1	-1.04089	196.593	95.5496
ENSMUSG00000041846.15	Ppp4r3a	-0.398375	196.545	149.121
ENSMUSG00000041408.18	Wapl	-0.884666	196.513	106.434
ENSMUSG00000032185.15	Carm1	-0.255047	196.503	164.662
ENSMUSG00000030120.14	Mlf2	0.415139	196.221	261.647
ENSMUSG00000026965.12	Anapc2	0.68525	196.06	315.26
ENSMUSG00000022752.9	Tomm70a	-0.0910581	195.955	183.97
ENSMUSG00000024048.15	Myl12a	0.886625	195.905	362.199
ENSMUSG00000028309.14	Rnf20	-0.175335	195.655	173.264
ENSMUSG00000027804.13	Ppid	-0.314486	195.348	157.087
ENSMUSG00000054309.9	Cpsf3	0.131264	195.09	213.673
ENSMUSG00000067194.6	Eif1ax	0.892566	195.085	362.171
ENSMUSG00000031660.13	Brd7	-0.715639	195.076	118.788
ENSMUSG00000021996.16	Esd	-0.642012	195.026	124.977
ENSMUSG00000001017.15	Chtop	-0.351632	194.938	152.772
ENSMUSG00000034101.14	Ctnnd1	0.297797	194.883	239.563
ENSMUSG00000026021.15	Sumo1	-0.666988	194.762	122.665
ENSMUSG00000101645.1	Gm28635	0.298851	194.708	239.522
ENSMUSG00000042606.9	Hirip3	-0.67559	194.489	121.765
ENSMUSG00000027423.15	Snx5	0.118646	194.229	210.877
ENSMUSG00000052488.7	Cherp	-0.578449	193.956	129.889
ENSMUSG00000030753.15	Thap12	-2.52125	193.955	33.7854
ENSMUSG00000016933.17	Plcg1	-0.603032	193.748	127.558
ENSMUSG00000042506.15	Usp22	0.647045	193.584	303.144
ENSMUSG00000021288.18	Klc1	0.139881	193.387	213.076
ENSMUSG00000028282.12	Casp8ap2	-1.69947	193.382	59.5422
ENSMUSG00000042712.10	Tceal9	0.117112	193.326	209.674
ENSMUSG00000027168.21	Pax6	-0.896731	193.039	103.682
ENSMUSG00000005442.13	Cic	-2.11527	193.014	44.5481
ENSMUSG00000027349.5	Fam98b	-0.282469	192.915	158.612
ENSMUSG00000040028.10	Elavl1	0.953776	192.492	372.844
ENSMUSG00000026276.20	2022-09-02	0.740416	192.437	321.497
ENSMUSG00000067873.11	Htatsf1	-0.622758	192.284	124.875
ENSMUSG00000116048.1	2022-09-02	0.738907	192.18	320.731
ENSMUSG00000028577.13	Plaa	-0.4427	192.137	141.366
ENSMUSG00000021374.10	Nup153	-1.3284	191.906	76.4191
ENSMUSG00000018848.4	Rars	0.0968402	191.8	205.116
ENSMUSG00000041645.14	Ddx24	-0.566852	191.509	129.285
ENSMUSG00000034906.15	Ncaph	-0.100927	191.408	178.475
ENSMUSG00000063450.14	Syne2	-0.669143	191.368	120.348
ENSMUSG00000030697.7	Ppp4c	0.070496	191.306	200.886
ENSMUSG00000010205.11	Raver1	-0.0772888	191.181	181.208
ENSMUSG00000111497.1	Gm38431	-0.0772888	191.181	181.208
ENSMUSG00000020859.16	Spag9	-1.38012	191.146	73.4357
ENSMUSG00000031314.18	Taf1	-0.755972	191.139	113.183
ENSMUSG00000013593.12	Ndufs2	0.228392	190.821	223.552
ENSMUSG00000005506.16	Celf1	0.46523	190.416	262.877
ENSMUSG00000022884.15	Eif4a2	-1.05008	190.382	91.9436
ENSMUSG00000050244.9	Heatr1	-0.49368	190.162	135.055
ENSMUSG00000034673.14	Pbx2	-0.685206	190.143	118.253
ENSMUSG00000116933.1	Atp5o	0.103274	190.016	204.117
ENSMUSG00000001424.14	Snd1	0.14915	189.927	210.613
ENSMUSG00000063856.7	Gpx1	-0.167302	189.331	168.6
ENSMUSG00000063888.7	Rpl7l1	-0.436229	189.3	139.905
ENSMUSG00000024507.6	Hsd17b4	0.64773	188.955	296.037
ENSMUSG00000022100.14	Xpo7	-0.442844	188.829	138.918
ENSMUSG00000030213.12	Atf7ip	-0.0989633	188.587	176.084
ENSMUSG00000032745.18	Gpbp1	-2.01211	188.374	46.7
ENSMUSG00000032580.12	Rbm5	-0.664587	188.283	118.782
ENSMUSG00000035851.14	Ythdc1	-0.0563383	188.122	180.917
ENSMUSG00000015880.13	Ncapg	0.105734	187.597	201.862
ENSMUSG00000069744.7	Psmb3	0.157634	187.508	209.157
ENSMUSG00000001383.9	Zmat2	0.409061	187.477	248.936
ENSMUSG00000040524.9	Zfp609	-1.69825	187.414	57.7533
ENSMUSG00000029422.15	Rsrc2	-0.372664	186.582	144.107
ENSMUSG00000022000.11	Zc3h13	-0.603789	186.532	122.743
ENSMUSG00000041720.14	Pi4ka	-0.764943	186.529	109.768
ENSMUSG00000070372.11	Capza1	-1.0524	186.114	89.7378
ENSMUSG00000027109.16	Sp3	-0.777245	186.102	108.587
ENSMUSG00000005871.15	Apc	-2.06269	186.01	44.525
ENSMUSG00000089739.2	Gm20431	-0.656863	185.942	117.935
ENSMUSG00000028911.16	Srsf4	0.0623728	185.926	194.141
ENSMUSG00000026933.17	Camsap1	-1.74163	185.895	55.5885
ENSMUSG00000025007.13	Aldh18a1	0.15929	185.647	207.319
ENSMUSG00000039967.14	Zfp292	-1.15549	185.544	83.293
ENSMUSG00000028873.16	Cdca8	0.062565	185.329	193.543
ENSMUSG00000022433.19	Csnk1e	-0.900649	184.98	99.0836
ENSMUSG00000039108.14	Lsm14b	-0.7119	184.571	112.684
ENSMUSG00000033952.14	Aspm	-0.853378	184.473	102.103
ENSMUSG00000034311.3	Kif4	-0.247908	184.242	155.153
ENSMUSG00000038406.17	Scaf1	-1.16169	184.073	82.2785
ENSMUSG00000042489.15	Clspn	-0.556305	183.327	124.67
ENSMUSG00000052296.7	Ppp6r1	-1.23043	182.901	77.9505
ENSMUSG00000025451.15	Paip1	-0.0985925	182.859	170.78
ENSMUSG00000013698.12	Pea15a	0.428221	182.647	245.765
ENSMUSG00000035478.14	Mbd3	0.246282	182.568	216.553
ENSMUSG00000026193.15	Fn1	-1.18049	182.112	80.348
ENSMUSG00000029227.15	Fip1l1	-0.201077	181.884	158.221
ENSMUSG00000005371.15	Fbxo11	-0.821177	181.665	102.818
ENSMUSG00000008333.12	Snrpb2	-0.0251635	181.551	178.412
ENSMUSG00000005103.12	Wdr1	0.210542	181.55	210.075
ENSMUSG00000037461.10	Ints7	-0.506606	181.479	127.739
ENSMUSG00000006676.16	Usp19	-0.222388	181.348	155.442
ENSMUSG00000030754.9	Copb1	0.250339	181.339	215.701
ENSMUSG00000002496.10	Tsc2	-1.0096	181.244	90.0211
ENSMUSG00000030663.12	1110004F10Rik	0.0888334	181.186	192.693
ENSMUSG00000029014.14	Dnajc2	-0.865039	180.996	99.3725
ENSMUSG00000024583.3	Txnl1	0.504854	180.982	256.809
ENSMUSG00000005312.15	Ubqln1	0.218023	180.817	210.315
ENSMUSG00000028609.6	Magoh	0.0691872	180.356	189.216
ENSMUSG00000021537.9	Cetn3	-0.068972	180.337	171.918
ENSMUSG00000042834.15	Nrep	-0.668534	180.324	113.45
ENSMUSG00000018417.14	Myo1b	-0.0342883	180.197	175.965
ENSMUSG00000041164.15	Zmiz2	-2.78579	180.055	26.1095
ENSMUSG00000024283.15	Wac	-2.21628	179.814	38.6951
ENSMUSG00000024400.16	Wdr33	-0.740141	179.805	107.646
ENSMUSG00000078923.10	Ube2v1	-0.633934	179.709	115.807
ENSMUSG00000035469.17	Rcbtb1	-0.443724	179.593	132.043
ENSMUSG00000024081.9	Cebpz	-0.622857	179.558	116.602
ENSMUSG00000021737.4	Psmd6	1.06241	179.408	374.679
ENSMUSG00000077450.13	Rab11b	-1.0633	179.344	85.8225
ENSMUSG00000063550.8	Nup98	-0.126065	179.239	164.242
ENSMUSG00000042406.8	Atf4	-1.6114	179.214	58.6535
ENSMUSG00000040782.12	Cop1	-3.24326	179.014	18.9046
ENSMUSG00000031095.15	Cul4b	-0.486813	178.865	127.638
ENSMUSG00000020198.8	Ap3d1	-0.723751	178.582	108.135
ENSMUSG00000036241.3	Ube2r2	-0.228184	178.546	152.426
ENSMUSG00000001674.11	Ddx18	-1.17457	178.53	79.0915
ENSMUSG00000040025.17	Ythdf2	-0.102355	178.246	166.038
ENSMUSG00000030512.13	Snrpa1	1.01174	178.245	359.405
ENSMUSG00000048170.14	Mcmbp	0.237569	178.208	210.108
ENSMUSG00000041219.14	Arhgap11a	-1.45592	178.134	64.9339
ENSMUSG00000025162.17	Csnk1d	0.116315	177.992	192.936
ENSMUSG00000055839.6	Elob	-0.391626	177.79	135.524
ENSMUSG00000024493.9	Lars	-0.139421	177.686	161.318
ENSMUSG00000028678.13	Kif2c	0.175068	177.531	200.436
ENSMUSG00000020936.8	Nmt1	-0.498491	177.515	125.654
ENSMUSG00000037458.15	Azin1	-1.14304	177.437	80.3446
ENSMUSG00000020706.13	Ftsj3	-0.285044	177.334	145.541
ENSMUSG00000052144.8	Ppp4r2	-1.33562	177.283	70.2433
ENSMUSG00000025203.6	Scd2	-0.24478	177.251	149.59
ENSMUSG00000024045.6	Akap8	-0.194594	177.052	154.712
ENSMUSG00000027187.10	Cat	0.414971	176.997	235.985
ENSMUSG00000021127.7	Zfp36l1	-0.890947	176.925	95.4088
ENSMUSG00000059474.13	Mbtd1	-1.62933	176.886	57.1761
ENSMUSG00000026867.18	Gapvd1	-0.40063	176.859	133.976
ENSMUSG00000004865.16	Srpk1	-0.124694	176.746	162.111
ENSMUSG00000005481.18	Ddx39	0.811583	176.34	309.502
ENSMUSG00000038324.13	Trpc4ap	0.138899	176.01	193.798
ENSMUSG00000022052.9	Ppp2r2a	-0.23654	175.93	149.325
ENSMUSG00000028796.17	Phc2	-0.551633	175.837	119.964
ENSMUSG00000025228.5	Actr1a	0.326581	175.766	220.418
ENSMUSG00000021048.7	Mthfd1	0.168822	175.345	197.113
ENSMUSG00000021149.8	Gtpbp4	-0.000908062	174.863	174.753
ENSMUSG00000035297.14	Cops4	0.179495	174.761	197.914
ENSMUSG00000053477.17	Tcf4	-0.393496	174.666	132.97
ENSMUSG00000029394.11	Cdk2ap1	-2.21826	174.44	37.4873
ENSMUSG00000044221.14	Grsf1	0.00264154	174.374	174.694
ENSMUSG00000022350.7	Washc5	-1.4492	174.333	63.8448
ENSMUSG00000028837.8	Psmb2	0.874773	174.308	319.632
ENSMUSG00000026864.13	Hspa5	0.0611747	174.278	181.827
ENSMUSG00000005609.16	Ctr9	-0.528692	174.267	120.799
ENSMUSG00000026192.13	Atic	0.49211	174.243	245.073
ENSMUSG00000026662.13	Sephs1	-0.333372	174.212	138.268
ENSMUSG00000015733.13	Capza2	0.370085	174.044	224.939
ENSMUSG00000027893.14	Ahcyl1	-0.0756139	174.034	165.148
ENSMUSG00000019849.11	Prep	0.295857	174.012	213.62
ENSMUSG00000033813.15	Tcea1	-0.490863	173.885	123.737
ENSMUSG00000034593.16	Myo5a	-0.486747	173.856	124.069
ENSMUSG00000021963.17	Sap18	-0.0090968	173.809	172.717
ENSMUSG00000025745.12	Hadha	0.137828	173.729	191.145
ENSMUSG00000026924.17	Sec16a	-1.14929	173.716	78.3193
ENSMUSG00000015291.10	Gdi1	0.173111	173.648	195.786
ENSMUSG00000036323.14	Srp72	-0.653579	173.637	110.381
ENSMUSG00000041126.16	H2afv	0.597582	173.58	262.657
ENSMUSG00000054808.15	Actn4	0.170343	173.506	195.251
ENSMUSG00000021767.18	Kat6b	-1.73702	173.476	52.041
ENSMUSG00000022031.6	Elp3	0.337126	173.315	218.938
ENSMUSG00000038518.15	Jarid2	-1.18468	173.116	76.1574
ENSMUSG00000042541.10	Sem1	1.62114	173.101	532.489
ENSMUSG00000023106.15	Denr	-0.812072	172.985	98.5258
ENSMUSG00000029920.9	Smarcad1	-0.277502	172.966	142.7
ENSMUSG00000038717.8	Atp5l	-2.21288	172.873	37.2894
ENSMUSG00000032366.15	Tpm1	1.19741	172.857	396.407
ENSMUSG00000020430.12	Pes1	0.0576372	172.694	179.733
ENSMUSG00000022360.8	Atad2	0.00670673	172.631	173.435
ENSMUSG00000039844.19	Rapgef1	-2.21416	172.534	37.1831
ENSMUSG00000004268.11	Emg1	-0.342687	172.2	135.792
ENSMUSG00000014313.15	Cox6c	-1.48464	172.084	61.4922
ENSMUSG00000024387.13	Csnk2b	1.12778	171.908	375.657
ENSMUSG00000079477.9	Rab7	-0.318549	171.875	137.822
ENSMUSG00000040738.10	Ints8	-0.357203	171.859	134.167
ENSMUSG00000067786.16	Nnat	1.26275	171.779	412.189
ENSMUSG00000032253.13	Phip	-0.552122	171.735	117.126
ENSMUSG00000017548.15	Suz12	-0.608429	171.585	112.544
ENSMUSG00000048327.6	Ckap2l	-1.11625	171.495	79.1091
ENSMUSG00000054199.17	Gon4l	-1.48477	171.474	61.2688
ENSMUSG00000038914.15	Dido1	-1.35409	171.444	67.0656
ENSMUSG00000118124.1	AC129217.1	-1.63197	171.288	55.2657
ENSMUSG00000089824.10	Rbm12	-0.551906	171.21	116.785
ENSMUSG00000029649.10	Pomp	0.453887	171.176	234.464
ENSMUSG00000030591.17	Psmd8	1.02656	171.073	348.503
ENSMUSG00000025665.16	Rps6ka6	-0.346673	170.999	134.473
ENSMUSG00000032397.7	Tipin	-0.356834	170.918	133.466
ENSMUSG00000030447.15	Cyfip1	0.150577	170.849	189.645
ENSMUSG00000026385.16	Dbi	1.01823	170.847	346.038
ENSMUSG00000041763.14	Tpp2	0.0268874	170.235	173.437
ENSMUSG00000032480.17	Dhx30	-0.945151	170.089	88.3402
ENSMUSG00000004642.13	Slbp	0.893405	169.967	315.724
ENSMUSG00000031985.9	Gnpat	-1.83756	169.864	47.5272
ENSMUSG00000026775.9	Yme1l1	-0.126983	169.708	155.409
ENSMUSG00000000001.4	Gnai3	0.564606	169.637	250.89
ENSMUSG00000025917.9	Cops5	-0.314578	169.568	136.347
ENSMUSG00000057278.8	Snrpg	-0.413007	169.536	127.331
ENSMUSG00000038371.15	Sbf2	-1.70781	169.384	51.8523
ENSMUSG00000071533.11	Pcnp	-1.06172	169.143	81.0295
ENSMUSG00000030298.10	Sec13	0.199974	169.061	194.197
ENSMUSG00000008958.14	Vps72	-0.256754	168.896	141.36
ENSMUSG00000030970.16	Ctbp2	-0.00319591	168.846	168.472
ENSMUSG00000073940.3	Hbb-bt	1.98699	168.676	668.644
ENSMUSG00000047248.20	C2cd3	-1.8031	168.256	48.2151
ENSMUSG00000027245.11	Hypk	0.499906	168.032	237.618
ENSMUSG00000022890.13	Atp5j	0.827705	167.974	298.131
ENSMUSG00000031065.14	Cdk16	-3.53004	167.962	14.54
ENSMUSG00000023505.13	Cdca3	0.6083	167.959	256.048
ENSMUSG00000078652.9	Psme3	0.702778	167.772	273.072
ENSMUSG00000033487.14	Fndc3a	-1.39357	167.398	63.7154
ENSMUSG00000040354.14	Mars	-0.160838	167.382	149.724
ENSMUSG00000020196.10	Cabin1	-1.43858	167.362	61.7447
ENSMUSG00000000325.16	Arvcf	-0.0826724	167.181	157.87
ENSMUSG00000032604.16	Qars	-0.143816	166.986	151.142
ENSMUSG00000033436.13	Armcx2	-1.79612	166.98	48.0815
ENSMUSG00000078427.3	Sarnp	0.397968	166.738	219.702
ENSMUSG00000071708.11	Sms	-2.29188	166.641	34.0296
ENSMUSG00000019977.16	Hbs1l	-1.12425	166.607	76.4294
ENSMUSG00000032740.16	Ccdc88a	-0.692772	166.449	102.976
ENSMUSG00000028402.18	Mpdz	-0.432301	166.427	123.336
ENSMUSG00000038025.8	Phf2	-1.59222	166.321	55.1622
ENSMUSG00000052293.14	Taf9	-2.34798	166.319	32.6685
ENSMUSG00000052752.15	Traf7	-2.19034	166.231	36.4211
ENSMUSG00000027883.15	Gpsm2	-0.269792	166.161	137.821
ENSMUSG00000072082.7	Ccnf	-0.648624	165.948	105.856
ENSMUSG00000029168.14	Dpysl5	0.371934	165.877	214.659
ENSMUSG00000030980.17	Knop1	-1.17828	165.73	73.2328
ENSMUSG00000003235.13	Eif2b5	0.0157223	165.594	167.408
ENSMUSG00000003814.8	Calr	0.608439	165.54	252.384
ENSMUSG00000042590.17	Ipo11	0.129775	165.487	181.063
ENSMUSG00000032737.13	Inppl1	-1.45627	165.244	60.2204
ENSMUSG00000040669.14	Phc1	-2.11438	165.154	38.1414
ENSMUSG00000022521.10	Crebbp	-0.347833	165.104	129.733
ENSMUSG00000038690.15	Atp5j2	1.01435	165.039	333.377
ENSMUSG00000030451.16	Herc2	-0.849031	164.964	91.5811
ENSMUSG00000027810.14	Eif2a	-0.773789	164.945	96.4732
ENSMUSG00000005779.12	Psmb4	1.47626	164.61	457.988
ENSMUSG00000056211.13	R3hdm1	-2.85708	164.6	22.7176
ENSMUSG00000074088.6	Snrnp40	0.594328	164.423	248.241
ENSMUSG00000033596.5	Rfwd3	-0.789788	164.102	94.9212
ENSMUSG00000002297.16	Dbf4	-1.46758	164.069	59.3256
ENSMUSG00000039509.8	Nup133	0.515752	163.983	234.453
ENSMUSG00000022781.8	Pak2	0.074027	163.464	172.07
ENSMUSG00000038733.14	Wdr26	-0.657306	163.328	103.56
ENSMUSG00000027108.15	Ola1	-0.168879	163.056	145.044
ENSMUSG00000034931.15	Dhx8	-0.403899	163.024	123.216
ENSMUSG00000075706.10	Gpx4	-0.747177	162.997	97.1086
ENSMUSG00000102976.6	Zc3h11a	-2.22399	162.868	34.8617
ENSMUSG00000116275.1	Zc3h11a	-2.22399	162.868	34.8617
ENSMUSG00000003778.14	Brd8	-0.819945	162.818	92.2306
ENSMUSG00000024542.9	Cep192	-1.41264	162.669	61.1021
ENSMUSG00000022757.19	Tfg	0.428485	162.616	218.852
ENSMUSG00000020166.15	Cnot2	-0.534221	162.374	112.124
ENSMUSG00000026554.15	Dcaf8	-0.500162	162.366	114.797
ENSMUSG00000076437.10	Selenoh	1.05246	162.333	336.689
ENSMUSG00000005656.9	Snx6	0.7377	162.198	270.468
ENSMUSG00000001517.14	Foxm1	-2.03362	161.972	39.5604
ENSMUSG00000020076.7	Ddx50	-1.00818	161.938	80.5114
ENSMUSG00000028514.15	Usp24	-0.881025	161.891	87.9036
ENSMUSG00000063358.17	Mapk1	0.621443	161.762	248.857
ENSMUSG00000018974.7	Sart3	-0.200673	161.745	140.742
ENSMUSG00000019494.14	Cops6	1.05268	161.703	335.434
ENSMUSG00000020739.11	Nup85	0.0979896	161.565	172.919
ENSMUSG00000070047.14	Fat1	-1.0036	161.547	80.5724
ENSMUSG00000037572.17	Wdhd1	-0.102857	161.503	150.389
ENSMUSG00000058301.8	Upf1	0.500291	161.441	228.358
ENSMUSG00000055491.14	Pprc1	-0.780517	161.389	93.9539
ENSMUSG00000037475.15	Thoc2	-0.779065	161.238	93.9608
ENSMUSG00000020780.15	Srp68	-0.319677	161.088	129.071
ENSMUSG00000027782.10	Kpna4	0.364918	160.872	207.172
ENSMUSG00000033031.13	Cip2a	-0.557931	160.854	109.264
ENSMUSG00000028849.17	Map7d1	-0.464884	160.697	116.43
ENSMUSG00000027011.14	Ube2e3	-0.403486	160.663	121.466
ENSMUSG00000032058.14	Ppp2r1b	0.114327	160.501	173.737
ENSMUSG00000024304.14	Cdh2	-0.445597	160.468	117.828
ENSMUSG00000022812.14	Gsk3b	0.178151	160.46	181.55
ENSMUSG00000024370.17	Cdc23	0.285226	160.327	195.375
ENSMUSG00000038644.14	Pold1	0.193343	160.129	183.093
ENSMUSG00000030189.15	Ybx3	0.294537	160.084	196.342
ENSMUSG00000038902.14	Pogz	-0.74643	159.926	95.3282
ENSMUSG00000034667.8	Xpot	-0.947332	159.761	82.8508
ENSMUSG00000020664.10	Dld	0.167544	159.7	179.366
ENSMUSG00000052915.14	Msl1	-1.92264	159.673	42.1172
ENSMUSG00000018476.7	Kdm6b	-1.50862	159.56	56.0766
ENSMUSG00000029176.13	Anapc4	0.0693312	159.498	167.35
ENSMUSG00000019428.16	Fkbp8	0.0734349	159.435	167.761
ENSMUSG00000023104.9	Rfc2	-0.899317	159.338	85.4274
ENSMUSG00000021273.11	Fdft1	0.22723	159.311	186.487
ENSMUSG00000008305.18	Tle1	-0.965305	159.045	81.458
ENSMUSG00000028423.15	Nfx1	-0.684501	159.028	98.9508
ENSMUSG00000025410.10	Dctn2	0.781811	158.93	273.246
ENSMUSG00000018765.5	Fxr2	-0.566059	158.853	107.299
ENSMUSG00000022456.17	2022-09-03	-1.81901	158.548	44.9349
ENSMUSG00000001380.7	Hars	0.276161	158.481	191.915
ENSMUSG00000027210.20	Meis2	-0.956714	158.334	81.5785
ENSMUSG00000031754.10	Nudt21	0.00677736	158.214	158.959
ENSMUSG00000020149.17	Rab1a	0.490103	158.018	221.944
ENSMUSG00000005204.12	Senp3	-0.900941	157.858	84.5391
ENSMUSG00000035683.13	Melk	0.418779	157.818	210.97
ENSMUSG00000042772.15	Smg7	-1.78559	157.71	45.7449
ENSMUSG00000037544.14	Dlgap5	0.0671526	157.672	165.184
ENSMUSG00000021990.15	Spata13	-0.363472	157.67	122.555
ENSMUSG00000052798.13	Nup107	-0.126254	157.661	144.45
ENSMUSG00000036529.17	Sbf1	-1.43325	157.651	58.3777
ENSMUSG00000079215.8	Zfp664	-3.75351	157.532	11.6801
ENSMUSG00000030983.4	Bccip	-0.363056	157.421	122.397
ENSMUSG00000018401.17	Mtmr4	-0.26618	157.346	130.836
ENSMUSG00000001847.14	Rac1	1.23347	157.242	369.726
ENSMUSG00000015755.16	Tab2	-2.1351	157.217	35.7907
ENSMUSG00000022272.17	Myo10	-0.670585	157.123	98.7129
ENSMUSG00000055319.8	Sec23ip	-0.44594	157.081	115.314
ENSMUSG00000024975.13	Pdcd4	1.03395	157.079	321.639
ENSMUSG00000027223.15	Mapk8ip1	-1.22261	157.056	67.2996
ENSMUSG00000032244.9	Fem1b	0.00133217	157.017	157.162
ENSMUSG00000049553.11	Polr1a	-0.968381	156.928	80.2027
ENSMUSG00000022048.8	Dpysl2	2.97301	156.905	1231.98
ENSMUSG00000032624.16	Eml4	-0.523422	156.824	109.105
ENSMUSG00000040331.16	Nsmce4a	0.484978	156.781	219.425
ENSMUSG00000004591.16	Pkn2	-0.609802	156.768	102.728
ENSMUSG00000039985.14	Sinhcaf	-1.64042	156.682	50.2577
ENSMUSG00000015023.7	Ddx19a	0.130386	156.564	171.373
ENSMUSG00000035632.16	Cnot3	-0.648671	156.532	99.8469
ENSMUSG00000017843.14	Ppp2r5c	-1.1829	156.504	68.9348
ENSMUSG00000020458.16	Rtn4	0.310305	156.476	194.026
ENSMUSG00000041997.16	Tlk1	-1.84287	156.313	43.5751
ENSMUSG00000024294.14	Mib1	-0.142143	156.25	141.589
ENSMUSG00000002812.4	Flii	-0.43285	156.182	115.699
ENSMUSG00000020340.16	Cyfip2	-0.671645	156.117	98.0088
ENSMUSG00000024817.13	Uhrf2	-0.310216	156.115	125.91
ENSMUSG00000051768.9	Xrcc1	-0.536367	155.964	107.538
ENSMUSG00000057177.12	Gsk3a	-0.571247	155.867	104.904
ENSMUSG00000032826.18	Ank2	-0.95376	155.834	80.4547
ENSMUSG00000034868.9	Myl12b	0.780085	155.74	267.441
ENSMUSG00000020211.15	Sf3a2	-0.555348	155.704	105.955
ENSMUSG00000021693.20	Kif2a	-0.30977	155.608	125.54
ENSMUSG00000002055.9	Spag5	-0.50358	155.523	109.699
ENSMUSG00000020687.13	Cdc27	-0.78524	155.447	90.199
ENSMUSG00000030079.15	Ruvbl1	-0.0560788	155.418	149.493
ENSMUSG00000024238.15	Zeb1	-0.900673	155.283	83.1756
ENSMUSG00000032254.10	Kif23	-0.258512	155.226	129.761
ENSMUSG00000013236.17	Ptprs	-1.42798	155.204	57.6816
ENSMUSG00000021258.10	Ccnk	-1.5699	154.433	52.0178
ENSMUSG00000040761.16	Spen	-1.91412	154.349	40.9539
ENSMUSG00000034160.13	Ogt	-0.27	154.323	127.983
ENSMUSG00000020265.16	Sumo3	0.0537453	154.306	160.163
ENSMUSG00000034525.7	Ice1	-1.70511	154.271	47.3145
ENSMUSG00000039852.17	Rere	-0.647559	154.242	98.4616
ENSMUSG00000057637.13	Prdm2	-1.49772	154.215	54.6095
ENSMUSG00000001289.12	Pfdn5	-0.0638698	154.207	147.529
ENSMUSG00000059273.9	Zc3h4	-0.398643	154.125	116.915
ENSMUSG00000037210.16	Fam193a	-0.710032	154.079	94.1893
ENSMUSG00000029833.17	Trim24	-0.7564	154.01	91.1694
ENSMUSG00000029101.16	Rgs12	-1.02595	153.843	75.5499
ENSMUSG00000068523.12	Gng5	-1.35769	153.602	59.9362
ENSMUSG00000027429.16	Sec23b	-0.00325704	153.163	152.817
ENSMUSG00000021782.14	Dlg5	-1.54409	153.099	52.4995
ENSMUSG00000045095.16	Magi1	-1.12764	153.017	70.0301
ENSMUSG00000035621.13	Midn	0.554319	152.992	224.666
ENSMUSG00000060279.14	Ap2a1	0.101345	152.902	164.029
ENSMUSG00000028811.11	Yars	0.0400159	152.831	157.13
ENSMUSG00000021549.14	Rasa1	-0.992815	152.827	76.7952
ENSMUSG00000064127.13	Med14	-1.30718	152.728	61.7192
ENSMUSG00000031628.9	Casp3	0.720814	152.665	251.609
ENSMUSG00000028465.16	Tln1	0.0450073	152.651	157.489
ENSMUSG00000020454.17	Eif4enif1	-1.28897	152.409	62.3724
ENSMUSG00000024604.7	Rbm22	-0.527603	152.27	105.631
ENSMUSG00000004263.15	Atn1	-2.12155	152.248	34.9868
ENSMUSG00000107478.1	Gm45234	-2.12155	152.248	34.9868
ENSMUSG00000098950.7	Gm28036	-0.495874	152.217	107.942
ENSMUSG00000027203.15	Dut	1.92905	152.177	579.493
ENSMUSG00000037552.17	Plekhg2	-1.68613	152.018	47.2411
ENSMUSG00000025404.15	R3hdm2	-3.38034	151.937	14.5908
ENSMUSG00000032382.14	Snx1	-0.320545	151.925	121.656
ENSMUSG00000053841.15	Txlna	0.0327698	151.824	155.312
ENSMUSG00000030934.9	Oat	0.709931	151.807	248.314
ENSMUSG00000038845.11	Phb	-0.298979	151.658	123.272
ENSMUSG00000021819.11	Zswim8	-1.47451	151.535	54.5309
ENSMUSG00000029131.14	Dnajb6	-1.59847	151.364	49.9842
ENSMUSG00000022119.15	Rbm26	-0.334655	151.337	120.006
ENSMUSG00000028248.15	Pnisr	-0.80468	151.301	86.6182
ENSMUSG00000035021.13	Baz1a	-0.545157	151.158	103.591
ENSMUSG00000025268.15	Maged2	0.221522	151.154	176.24
ENSMUSG00000032393.15	Dpp8	-1.46041	150.95	54.8535
ENSMUSG00000032280.16	Tle3	-0.950404	150.911	78.0947
ENSMUSG00000018412.16	Kansl1	-1.69682	150.908	46.5498
ENSMUSG00000042308.14	Setd1a	-1.49958	150.776	53.3228
ENSMUSG00000061950.17	Ppp4r1	-0.349064	150.759	118.36
ENSMUSG00000034297.14	Med13	-1.36269	150.738	58.6153
ENSMUSG00000018446.8	C1qbp	1.38299	150.575	392.712
ENSMUSG00000003033.15	Ap1m1	-0.273064	150.568	124.604
ENSMUSG00000037058.16	Paip2	0.713849	150.427	246.726
ENSMUSG00000024420.9	Zfp521	-1.11339	150.413	69.5222
ENSMUSG00000025224.16	Gbf1	-0.867037	150.105	82.2981
ENSMUSG00000019132.11	BC005537	-4.82322	150.092	5.3018
ENSMUSG00000039671.18	Zmynd8	-0.698227	150.03	92.468
ENSMUSG00000020453.17	Patz1	-0.345343	149.913	118
ENSMUSG00000030678.7	Maz	-0.601371	149.542	98.5675
ENSMUSG00000028455.15	Stoml2	-0.0272766	149.54	146.74
ENSMUSG00000022033.9	Pbk	0.272715	149.38	180.462
ENSMUSG00000031299.10	Pdha1	0.0226969	149.278	151.645
ENSMUSG00000031161.15	Hdac6	-0.31033	149.179	120.306
ENSMUSG00000028896.13	Rcc1	0.31416	149.059	185.323
ENSMUSG00000042354.7	Gnl3	-0.403486	149.04	112.678
ENSMUSG00000032218.7	Ccnb2	0.069713	148.964	156.339
ENSMUSG00000041781.9	Cpsf2	0.31991	148.898	185.862
ENSMUSG00000041360.8	Pum3	-0.115105	148.53	137.14
ENSMUSG00000028986.12	Klhl7	0.281688	148.461	180.471
ENSMUSG00000024454.16	Hdac3	-0.295567	148.274	120.807
ENSMUSG00000033799.10	Tasor2	-1.36165	148.247	57.6886
ENSMUSG00000041852.15	Tcf20	-1.89663	148.214	39.8056
ENSMUSG00000014602.15	Kif1a	-0.529266	148.1	102.62
ENSMUSG00000004356.8	Utp20	-0.381253	148.053	113.67
ENSMUSG00000024070.15	Prkd3	-1.34893	148.036	58.1162
ENSMUSG00000058290.4	Espl1	-0.274784	148.019	122.348
ENSMUSG00000043535.13	Setx	-1.09534	147.831	69.189
ENSMUSG00000037674.15	Rfx7	-1.31254	147.769	59.4936
ENSMUSG00000042439.13	Zfp532	-1.45046	147.723	54.0526
ENSMUSG00000003131.7	Pafah1b2	1.26811	147.685	355.694
ENSMUSG00000001415.10	Smg5	-2.14837	147.556	33.2839
ENSMUSG00000067367.9	Lyar	-0.349553	147.55	115.801
ENSMUSG00000024844.15	Banf1	0.888216	147.501	273.008
ENSMUSG00000002455.14	Prpf6	0.185144	147.499	167.696
ENSMUSG00000009630.10	Ppp2cb	0.231388	147.332	172.963
ENSMUSG00000069729.14	Arid1b	-1.27312	147.215	60.9123
ENSMUSG00000024217.10	Snrpc	-1.26967	147.12	61.0188
ENSMUSG00000020368.15	Canx	0.0692371	147.077	154.308
ENSMUSG00000041057.10	Wdr43	-0.101806	147.058	137.038
ENSMUSG00000058258.14	Idi1	-0.879242	147.034	79.9354
ENSMUSG00000022338.8	Eny2	0.0238664	147.016	149.468
ENSMUSG00000029761.16	Cald1	-0.230892	146.983	125.245
ENSMUSG00000063445.14	Nmral1	1.01243	146.901	296.345
ENSMUSG00000018425.18	Dhx40	-0.612307	146.742	95.9911
ENSMUSG00000038708.10	Golga4	-1.36453	146.674	56.9625
ENSMUSG00000048154.17	Kmt2d	-1.06873	146.663	69.9198
ENSMUSG00000054428.12	Atpif1	1.56776	146.58	434.527
ENSMUSG00000042605.16	Atxn2	-1.0745	146.472	69.5504
ENSMUSG00000025968.16	Ndufs1	0.292216	146.316	179.167
ENSMUSG00000037343.8	Taf2	-1.21622	146.28	62.9599
ENSMUSG00000035575.11	Utp6	0.274718	146.122	176.772
ENSMUSG00000049823.9	Zbtb12	-0.472313	146.117	105.322
ENSMUSG00000029910.14	Mad2l1	-0.58625	146.065	97.2896
ENSMUSG00000025156.17	Gps1	-0.0173787	146.062	144.313
ENSMUSG00000073838.10	Tufm	-0.0605617	146.01	140.008
ENSMUSG00000030876.7	Mettl9	-2.45763	145.998	26.5783
ENSMUSG00000022992.17	Kansl2	-1.8925	145.847	39.2824
ENSMUSG00000028882.13	Ppp1r8	0.111201	145.78	157.46
ENSMUSG00000024384.4	Iws1	0.189699	145.733	166.213
ENSMUSG00000025812.17	Pard3	-0.75779	145.695	86.1645
ENSMUSG00000046201.9	Scaf8	-1.12568	145.419	66.6438
ENSMUSG00000001855.15	Nup214	-0.659352	145.388	92.0541
ENSMUSG00000027282.17	Mtch2	0.114666	145.281	157.299
ENSMUSG00000046574.8	Prr12	-1.04462	145.232	70.4048
ENSMUSG00000017119.19	Nbr1	-0.518903	145.167	101.312
ENSMUSG00000021266.16	Wars	0.00629646	145.148	145.783
ENSMUSG00000039219.18	Arid4b	-0.726348	145.067	87.6832
ENSMUSG00000033295.14	Ptprf	-1.61619	145.01	47.3016
ENSMUSG00000027998.11	Plrg1	0.43855	144.918	196.399
ENSMUSG00000005687.14	Bcas2	0.787955	144.854	250.108
ENSMUSG00000043940.15	Wdfy3	-1.30688	144.747	58.5062
ENSMUSG00000001642.18	Akr1b3	-0.50807	144.67	101.727
ENSMUSG00000004096.9	Cwc15	0.170377	144.66	162.793
ENSMUSG00000037916.14	Ndufv1	0.492941	144.559	203.439
ENSMUSG00000062248.5	Cks2	-1.01054	144.354	71.6515
ENSMUSG00000030655.15	Smg1	-1.24879	144.334	60.7361
ENSMUSG00000034317.14	Trim59	-0.418197	144.332	108.012
ENSMUSG00000039994.15	Timeless	-0.242814	144.308	121.954
ENSMUSG00000021555.15	Naa35	-0.026284	144.254	141.65
ENSMUSG00000027496.15	Aurka	0.170706	144.115	162.217
ENSMUSG00000026683.14	Nuf2	-0.407897	144.086	108.601
ENSMUSG00000022437.7	Samm50	-0.163596	143.784	128.37
ENSMUSG00000025758.10	Plk4	-2.16203	143.706	32.1097
ENSMUSG00000031731.16	Ap1g1	0.160929	143.474	160.404
ENSMUSG00000033004.15	Mycbp2	-1.47433	143.408	51.6128
ENSMUSG00000041168.10	Lonp1	-0.355712	143.38	112.049
ENSMUSG00000042043.6	Tbca	0.113505	143.251	154.977
ENSMUSG00000029632.7	Ndufa4	0.765095	143.245	243.442
ENSMUSG00000031207.16	Msn	0.916912	143.217	270.403
ENSMUSG00000030528.12	Blm	-0.903269	143.02	76.4691
ENSMUSG00000020869.8	Lrrc59	0.687925	142.992	230.356
ENSMUSG00000022568.17	Scrib	-1.13159	142.984	65.2598
ENSMUSG00000034573.14	Ptpn13	-1.7234	142.95	43.2901
ENSMUSG00000043733.14	Ptpn11	-0.263669	142.832	118.974
ENSMUSG00000037017.15	Zscan21	-0.792562	142.816	82.4503
ENSMUSG00000025607.15	Copg2	0.308901	142.621	176.673
ENSMUSG00000031511.15	Arhgef7	-0.810718	142.602	81.297
ENSMUSG00000020898.18	Ctc1	-0.261134	142.519	118.923
ENSMUSG00000024120.12	Lrpprc	0.208431	142.364	164.492
ENSMUSG00000022387.17	Brd1	-1.18086	142.353	62.7903
ENSMUSG00000021929.9	Kpna3	0.415231	142.324	189.791
ENSMUSG00000024099.15	Ndufv2	0.310122	142.239	176.35
ENSMUSG00000024943.9	Smc5	-0.0918281	142.201	133.432
ENSMUSG00000018377.10	Vezf1	-0.804266	142.159	81.4081
ENSMUSG00000025747.12	Tyms	0.297255	142.158	174.684
ENSMUSG00000065947.3	mt-Nd4l	-5.18761	141.55	3.88404
ENSMUSG00000056612.7	Ppp1r14b	-0.492873	141.48	100.537
ENSMUSG00000034218.16	Atm	-0.658269	141.463	89.6364
ENSMUSG00000022193.7	Psmb5	0.533004	141.36	204.539
ENSMUSG00000005469.10	Prkaca	0.217968	141.358	164.413
ENSMUSG00000025047.9	Pdcd11	-0.219269	141.209	121.299
ENSMUSG00000025403.5	Shmt2	0.271678	141.076	170.309
ENSMUSG00000021326.13	Trim27	-0.255032	141.066	118.209
ENSMUSG00000025439.5	Clns1a	1.14218	140.895	310.975
ENSMUSG00000028405.9	Aco1	-0.226377	140.887	120.427
ENSMUSG00000026991.20	Pkp4	-2.24171	140.858	29.7825
ENSMUSG00000040824.3	Snrpd2	0.796597	140.826	244.615
ENSMUSG00000036180.15	Gatad2a	-0.787137	140.626	81.4916
ENSMUSG00000029475.17	Kdm2b	-1.49628	140.404	49.7686
ENSMUSG00000035770.8	Dync1li2	-0.120843	140.392	129.111
ENSMUSG00000032966.14	Fkbp1a	0.25438	140.297	167.349
ENSMUSG00000026484.13	Rnf2	0.224258	140.13	163.696
ENSMUSG00000016253.12	Nelfcd	0.402418	140.127	185.209
ENSMUSG00000022789.15	Dnm1l	-0.252158	140.087	117.623
ENSMUSG00000009863.14	Sdhb	0.868303	140.057	255.676
ENSMUSG00000039191.12	Rbpj	-0.962105	140.006	71.8662
ENSMUSG00000061755.10	Bod1l	-0.912199	139.995	74.3898
ENSMUSG00000040661.6	Rad54l2	-1.40672	139.966	52.7909
ENSMUSG00000031245.8	Hmgn5	0.21357	139.703	161.994
ENSMUSG00000030374.15	Strn4	-0.538013	139.665	96.19
ENSMUSG00000021193.10	Pitrm1	-0.243846	139.553	117.851
ENSMUSG00000039298.16	Cdk5rap2	-0.62175	139.537	90.6828
ENSMUSG00000018160.15	Med1	-1.31041	139.502	56.2481
ENSMUSG00000026245.16	Farsb	0.180016	139.444	157.975
ENSMUSG00000051934.5	Spats2	-0.616509	139.44	90.9493
ENSMUSG00000047036.8	Zfp445	-1.23805	139.289	59.0506
ENSMUSG00000020694.17	Tlk2	-1.09793	139.211	65.0375
ENSMUSG00000030890.16	Ilk	-0.0878643	139.072	130.854
ENSMUSG00000024695.15	Zfp91	-1.28742	139.069	56.974
ENSMUSG00000014426.9	Map3k4	-0.794692	138.983	80.1188
ENSMUSG00000032560.14	Dnajc13	-1.14147	138.82	62.9265
ENSMUSG00000054611.17	Kdm2a	-0.595506	138.766	91.8373
ENSMUSG00000039768.16	Dnajc11	-0.0776975	138.684	131.413
ENSMUSG00000039041.15	Adrm1	-0.0627924	138.655	132.749
ENSMUSG00000079184.10	Mphosph8	-0.972175	138.47	70.5832
ENSMUSG00000029621.14	Arpc1a	-0.414527	138.414	103.847
ENSMUSG00000022400.9	Rbx1	-0.144553	138.328	125.14
ENSMUSG00000039515.11	Ptpa	-0.335631	138.31	109.602
ENSMUSG00000024515.13	Smad4	0.251952	138.31	164.701
ENSMUSG00000117310.1	Ptp4a1	-2.35984	138.306	26.9436
ENSMUSG00000036377.18	C530008M17Rik	-1.36199	138.068	53.7146
ENSMUSG00000025027.18	Xpnpep1	0.0572361	138.062	143.65
ENSMUSG00000018921.11	Pelp1	-0.289451	138.05	112.954
ENSMUSG00000047284.14	Neurl4	-1.22878	137.996	58.8798
ENSMUSG00000060510.14	Zfp266	0.0623782	137.952	144.048
ENSMUSG00000058594.15	Fbh1	-1.10378	137.888	64.1587
ENSMUSG00000028792.14	Ak2	0.244029	137.875	163.285
ENSMUSG00000026764.15	Kif5c	0.0796786	137.847	145.674
ENSMUSG00000058006.12	Mdn1	-0.237062	137.79	116.911
ENSMUSG00000022024.10	Sugt1	0.20419	137.663	158.593
ENSMUSG00000022332.8	Khdrbs3	-1.10722	137.646	63.8935
ENSMUSG00000047879.17	Usp14	0.356431	137.491	176.023
ENSMUSG00000041297.8	Cdk13	-0.781607	137.485	79.9776
ENSMUSG00000049470.13	Aff4	-0.565993	137.418	92.8248
ENSMUSG00000039959.13	Hip1	-0.349814	137.227	107.68
ENSMUSG00000004789.10	Dlst	0.0555225	137.183	142.566
ENSMUSG00000020716.16	Nf1	-0.554812	137.16	93.3708
ENSMUSG00000049739.10	Zfp646	-2.07971	137.132	32.4401
ENSMUSG00000006678.6	Pola1	0.152857	136.902	152.204
ENSMUSG00000029538.14	Srsf9	1.09054	136.859	291.448
ENSMUSG00000020463.15	Ppp4r3b	-0.672484	136.606	85.71
ENSMUSG00000038388.14	Mpp6	-1.51131	136.56	47.9042
ENSMUSG00000015889.8	Lta4h	0.668792	136.551	217.08
ENSMUSG00000029414.11	Kntc1	-0.704779	136.428	83.7033
ENSMUSG00000033943.15	Mga	-0.77822	136.348	79.5029
ENSMUSG00000020918.14	Kat2a	-0.742365	136.185	81.4058
ENSMUSG00000067851.11	Arfgef1	-1.54769	136.171	46.5784
ENSMUSG00000021156.17	Zmynd11	-1.30684	136.143	55.03
ENSMUSG00000022246.14	Rai14	-0.437013	136.095	100.528
ENSMUSG00000027649.15	Ctnnbl1	0.536465	136.054	197.335
ENSMUSG00000029673.17	Auts2	-0.79889	135.838	78.0786
ENSMUSG00000053110.13	Yap1	0.116523	135.787	147.21
ENSMUSG00000063480.8	Snu13	-1.54074	135.787	46.6711
ENSMUSG00000041815.14	Poldip3	0.684468	135.738	218.146
ENSMUSG00000026095.15	Asnsd1	-2.86418	135.728	18.6408
ENSMUSG00000038095.15	Sbno1	-0.772184	135.709	79.4619
ENSMUSG00000030268.17	Bcat1	0.332101	135.585	170.68
ENSMUSG00000028991.15	Mtor	-0.647102	135.585	86.5793
ENSMUSG00000022186.14	Oxct1	-0.0179082	135.479	133.808
ENSMUSG00000040325.16	Dcaf1	-0.279726	135.315	111.465
ENSMUSG00000074102.4	Rbm15b	-1.369	135.152	52.3257
ENSMUSG00000030061.16	Uba3	-0.203037	135.147	117.405
ENSMUSG00000022263.10	Trio	-0.873263	135.044	73.722
ENSMUSG00000028044.6	Cks1b	0.131124	135.032	147.879
ENSMUSG00000001910.5	Nacc1	-0.846027	135.029	75.1186
ENSMUSG00000052534.15	Pbx1	-0.0080768	135.021	134.267
ENSMUSG00000041570.14	Camsap2	-1.24727	134.959	56.8508
ENSMUSG00000045624.15	Esf1	-0.383546	134.946	103.443
ENSMUSG00000042502.10	Cd2bp2	0.170695	134.94	151.889
ENSMUSG00000030319.8	Cand2	0.885505	134.86	249.142
ENSMUSG00000031246.14	Sh3bgrl	0.683777	134.791	216.521
ENSMUSG00000047213.14	Ythdf3	0.018202	134.689	136.399
ENSMUSG00000027239.14	Mdk	0.451008	134.664	184.085
ENSMUSG00000031691.14	Tnpo2	-0.232389	134.502	114.491
ENSMUSG00000044308.17	Ubr3	-0.563677	134.473	90.9811
ENSMUSG00000001761.7	Smo	-4.27145	134.43	6.96084
ENSMUSG00000022945.12	Chaf1b	0.0489746	134.375	139.014
ENSMUSG00000058325.6	Dock1	-0.898239	134.244	72.0276
ENSMUSG00000032312.7	Csk	-0.830367	134.12	75.4273
ENSMUSG00000038848.14	Ythdf1	-0.327156	134.022	106.829
ENSMUSG00000042426.6	Dhx29	-0.570245	133.863	90.1568
ENSMUSG00000037029.8	Zfp146	-2.25731	133.709	27.9668
ENSMUSG00000026509.15	Capn2	0.0337822	133.673	136.84
ENSMUSG00000060475.13	Wtap	-0.978971	133.668	67.8151
ENSMUSG00000029465.14	Arpc3	0.737998	133.628	222.873
ENSMUSG00000026374.14	Tsn	0.860492	133.403	242.214
ENSMUSG00000028675.12	Pnrc2	0.0792072	133.394	140.922
ENSMUSG00000057110.15	Cntrl	-1.58046	133.36	44.5922
ENSMUSG00000015143.15	Actn1	0.337357	133.36	168.492
ENSMUSG00000067148.15	Polr1c	0.546167	133.308	194.656
ENSMUSG00000028729.15	Ebna1bp2	-0.224081	133.241	114.073
ENSMUSG00000039068.16	Zzz3	-1.74405	133.241	39.7764
ENSMUSG00000056305.4	Usp39	0.0720907	133.125	139.946
ENSMUSG00000025571.13	Tnrc6c	-1.72458	133.066	40.2639
ENSMUSG00000027160.16	Ccdc34	-0.259281	133.06	111.173
ENSMUSG00000035198.9	Tubg1	0.254872	132.952	158.642
ENSMUSG00000010517.7	Faf1	-0.240678	132.824	112.415
ENSMUSG00000024812.11	Tjp2	-0.351952	132.693	103.968
ENSMUSG00000021115.15	Vrk1	0.204269	132.656	152.833
ENSMUSG00000037993.8	Dhx38	-0.607839	132.639	87.035
ENSMUSG00000024260.14	Sap130	-1.30571	132.588	53.6347
ENSMUSG00000059981.12	Taok2	-1.28429	132.585	54.4361
ENSMUSG00000003099.11	Ppp5c	-0.26495	132.556	110.317
ENSMUSG00000039748.11	Exo1	-0.640377	132.441	84.9667
ENSMUSG00000071655.12	Ubxn1	0.754962	132.219	223.131
ENSMUSG00000038143.16	Stox2	-2.30965	132.182	26.6622
ENSMUSG00000006273.14	Atp6v1b2	0.604342	132.17	200.936
ENSMUSG00000054115.11	Skp2	0.583036	132.154	197.966
ENSMUSG00000017264.16	Exosc10	-0.375809	132.064	101.778
ENSMUSG00000025395.14	Prim1	-0.194805	131.982	115.311
ENSMUSG00000033904.16	Ccp110	-1.57741	131.871	44.1878
ENSMUSG00000025246.13	Tbl1x	-0.452848	131.863	96.3392
ENSMUSG00000022377.16	Asap1	-1.32117	131.594	52.6652
ENSMUSG00000055932.15	Fto	0.129574	131.564	143.927
ENSMUSG00000039804.15	Ncoa5	0.442457	131.526	178.733
ENSMUSG00000040054.16	Baz2a	-1.33557	131.471	52.0936
ENSMUSG00000056770.15	Setd3	-2.00747	131.471	32.698
ENSMUSG00000022682.8	Rrn3	0.397718	131.352	173.046
ENSMUSG00000028884.14	Rpa2	0.483291	131.323	183.58
ENSMUSG00000020476.14	Dbnl	0.200275	131.162	150.694
ENSMUSG00000032330.7	Cox7a2	0.238667	131.08	154.661
ENSMUSG00000109511.1	Nup62	-0.35966	131.073	102.151
ENSMUSG00000017210.14	Med24	-0.616927	130.975	85.4036
ENSMUSG00000028249.15	Sdcbp	0.890708	130.83	242.571
ENSMUSG00000019803.11	Nr2e1	-0.303057	130.79	106.009
ENSMUSG00000079487.11	Med12	-0.373035	130.772	100.977
ENSMUSG00000024795.11	Kif20b	-0.746216	130.685	77.9099
ENSMUSG00000027852.14	Nras	-0.442269	130.653	96.1575
ENSMUSG00000109865.1	Hspa14	-0.0766871	130.645	123.882
ENSMUSG00000025423.16	Pias2	-1.43245	130.58	48.3799
ENSMUSG00000061436.15	Hipk2	-1.72215	130.529	39.5629
ENSMUSG00000037474.13	Dtl	0.00779405	130.479	131.186
ENSMUSG00000018433.14	Nol11	0.28732	130.437	159.182
ENSMUSG00000028233.6	Tgs1	-0.304712	130.356	105.537
ENSMUSG00000034648.9	Lrrn1	-1.0959	130.341	60.9793
ENSMUSG00000029146.14	Snx17	-0.377481	130.122	100.165
ENSMUSG00000027254.13	Map1a	-1.12519	130.116	59.6506
ENSMUSG00000037791.15	Phf12	-1.72511	130.067	39.3421
ENSMUSG00000003345.16	Csnk1g2	-2.66666	130.044	20.4809
ENSMUSG00000049550.17	Clip1	-0.770011	129.985	76.225
ENSMUSG00000028053.13	Ash1l	-1.53045	129.905	44.9693
ENSMUSG00000022680.14	Pdxdc1	-0.453971	129.876	94.8134
ENSMUSG00000025204.10	Ndufb8	0.834102	129.876	231.536
ENSMUSG00000015087.14	Rabl6	-1.7198	129.809	39.4087
ENSMUSG00000034290.9	Nek9	-0.696916	129.729	80.0288
ENSMUSG00000027326.13	Knl1	-0.819895	129.655	73.4471
ENSMUSG00000062234.14	Gak	-1.12861	129.633	59.2885
ENSMUSG00000028416.12	Bag1	-2.00135	129.558	32.3591
ENSMUSG00000038241.16	Cep250	-1.34284	129.531	51.0667
ENSMUSG00000039536.16	Stau1	-0.207935	129.399	112.03
ENSMUSG00000068267.5	Cenpb	-1.91796	129.331	34.2246
ENSMUSG00000001150.7	Mcm3ap	-1.07645	129.162	61.2479
ENSMUSG00000075232.5	Amd1	-2.43187	129.143	23.9335
ENSMUSG00000026043.18	Col3a1	-0.316901	129.143	103.675
ENSMUSG00000040459.11	Arglu1	0.657714	129.13	203.713
ENSMUSG00000022142.8	Nup155	0.586736	129.127	193.928
ENSMUSG00000036822.6	Topors	-0.809504	128.889	73.5411
ENSMUSG00000032368.14	Zic1	-0.31817	128.83	103.333
ENSMUSG00000029467.15	Atp2a2	-0.781679	128.731	74.8815
ENSMUSG00000047459.14	Dynlrb1	-0.931743	128.728	67.4823
ENSMUSG00000019124.10	Scrn1	0.479774	128.562	179.283
ENSMUSG00000036980.13	Taf6	-1.28774	128.222	52.5188
ENSMUSG00000037275.14	Gemin5	-0.511778	128.126	89.8618
ENSMUSG00000040648.14	Ppip5k2	-1.21956	128.073	54.9965
ENSMUSG00000021676.10	Iqgap2	-0.348935	127.984	100.488
ENSMUSG00000008604.11	Ubqln4	-0.0389833	127.982	124.57
ENSMUSG00000022463.8	Srebf2	-1.51429	127.981	44.8021
ENSMUSG00000018572.10	Phf23	-0.351166	127.892	100.261
ENSMUSG00000029599.13	Ddx54	-0.183441	127.752	112.498
ENSMUSG00000020954.16	Strn3	-0.604143	127.609	83.9491
ENSMUSG00000002968.9	Med25	-0.13135	127.404	116.317
ENSMUSG00000030986.13	Dhx32	-0.303084	127.395	103.256
ENSMUSG00000021143.10	Pacs2	-1.70353	127.257	39.0721
ENSMUSG00000021816.11	Ppp3cb	-0.552394	127.244	86.7659
ENSMUSG00000023883.13	Phf10	-1.30095	127.226	51.6359
ENSMUSG00000037032.16	Apbb1	-0.438606	126.993	93.7015
ENSMUSG00000032872.16	Cyb5r4	-2.4574	126.974	23.1186
ENSMUSG00000025474.9	Tubgcp2	-0.317033	126.97	101.921
ENSMUSG00000022897.15	Dyrk1a	-0.578063	126.871	84.9863
ENSMUSG00000032512.7	Wdr48	-0.222322	126.834	108.72
ENSMUSG00000011114.18	Tbrg1	0.154094	126.809	141.104
ENSMUSG00000029148.15	Nrbp1	0.353219	126.764	161.929
ENSMUSG00000033166.11	Dis3	-0.00388035	126.749	126.409
ENSMUSG00000002372.9	Ranbp3	0.141668	126.714	139.788
ENSMUSG00000020897.12	Aurkb	0.720729	126.526	208.517
ENSMUSG00000016252.7	Atp5e	1.04537	126.515	261.114
ENSMUSG00000035455.12	Fignl1	0.438582	126.369	171.265
ENSMUSG00000027881.14	Prpf38b	-0.170434	126.342	112.265
ENSMUSG00000037570.16	Mcrs1	-1.45439	126.245	46.0678
ENSMUSG00000026987.16	Baz2b	-0.986804	126.09	63.6245
ENSMUSG00000031231.4	Cox7b	0.39298	126.031	165.492
ENSMUSG00000053453.9	Thoc7	0.258752	125.985	150.734
ENSMUSG00000022983.16	Scaf4	-0.791352	125.905	72.7483
ENSMUSG00000022407.10	Adsl	0.283801	125.57	152.869
ENSMUSG00000071337.11	Tia1	-0.507815	125.513	88.2717
ENSMUSG00000003119.14	Cdk12	-0.895658	125.416	67.4112
ENSMUSG00000063800.5	Prpf38a	-0.0476888	125.41	121.332
ENSMUSG00000020307.15	Cdc34	-0.724875	125.349	75.8424
ENSMUSG00000033059.7	Pygb	0.3404	125.348	158.704
ENSMUSG00000049327.17	Kmt5a	-1.69067	125.334	38.8264
ENSMUSG00000039682.12	Lap3	0.0260762	125.299	127.584
ENSMUSG00000022770.17	Dlg1	-0.978679	125.249	63.5571
ENSMUSG00000040097.16	Flywch1	-0.569476	125.243	84.3963
ENSMUSG00000031066.10	Usp11	0.0784546	125.232	132.231
ENSMUSG00000041560.12	Nop53	0.219447	125.226	145.799
ENSMUSG00000020315.18	Sptbn1	-0.0801931	124.931	118.176
ENSMUSG00000058076.12	Sdhc	1.09157	124.896	266.16
ENSMUSG00000021794.16	Glud1	-0.496892	124.872	88.4885
ENSMUSG00000028576.12	Ift74	-0.0942135	124.862	116.969
ENSMUSG00000034484.8	Snx2	-0.372671	124.807	96.3946
ENSMUSG00000036882.7	Arhgap33	-2.58283	124.684	20.8114
ENSMUSG00000034621.14	Gpatch8	-0.807079	124.636	71.2343
ENSMUSG00000036781.13	Rps27l	0.474804	124.588	173.143
ENSMUSG00000038279.10	Nop2	-0.0271118	124.567	122.248
ENSMUSG00000020899.16	Pfas	0.288107	124.343	151.828
ENSMUSG00000038379.15	Ttk	-0.723994	124.109	75.138
ENSMUSG00000005575.16	Ube2m	0.268877	124.103	149.528
ENSMUSG00000026516.8	Nvl	-0.0464394	124.036	120.107
ENSMUSG00000063884.6	Ptcd3	-0.26801	123.916	102.908
ENSMUSG00000033065.14	Pfkm	0.0716847	123.908	130.22
ENSMUSG00000031729.6	Ist1	0.343162	123.902	157.174
ENSMUSG00000006169.19	Clint1	0.380096	123.876	161.216
ENSMUSG00000038467.15	Chmp4b	0.717293	123.841	203.605
ENSMUSG00000073079.6	Srp54a	-0.00118129	123.819	123.718
ENSMUSG00000049606.16	Zfp644	-0.728099	123.8	74.7382
ENSMUSG00000019907.10	Ppp1r12a	-0.0847781	123.792	116.727
ENSMUSG00000024290.9	Rock1	-1.01529	123.748	61.2217
ENSMUSG00000016382.15	Pls3	0.217055	123.747	143.839
ENSMUSG00000042625.16	Safb2	-0.0053295	123.745	123.288
ENSMUSG00000079562.7	Maea	0.461912	123.672	170.342
ENSMUSG00000001052.15	Sec24b	-0.602824	123.549	81.3527
ENSMUSG00000037174.18	Elf2	-0.836368	123.362	69.0891
ENSMUSG00000021182.16	Ccdc88c	-0.669991	123.357	77.5313
ENSMUSG00000041936.18	Agrn	-1.42425	123.316	45.949
ENSMUSG00000041028.16	Ghitm	0.482961	123.165	172.137
ENSMUSG00000017716.15	Birc5	0.236487	123.159	145.096
ENSMUSG00000020986.13	Sec23a	-0.305628	123.011	99.5272
ENSMUSG00000034543.15	Morc2a	-0.392746	122.894	93.6059
ENSMUSG00000022247.12	Brix1	0.385576	122.801	160.425
ENSMUSG00000027030.15	Stk39	-0.260475	122.793	102.509
ENSMUSG00000021589.13	Rhobtb3	-0.832951	122.781	68.9269
ENSMUSG00000092541.7	Gm20537	-0.219357	122.758	105.443
ENSMUSG00000021824.13	Ap3m1	-0.385126	122.693	93.9476
ENSMUSG00000024212.9	Mllt1	-0.488721	122.689	87.4349
ENSMUSG00000021748.9	Pdhb	0.369673	122.608	158.417
ENSMUSG00000022881.15	Rfc4	0.360959	122.529	157.362
ENSMUSG00000002221.11	Paxip1	-1.84147	122.481	34.1767
ENSMUSG00000029203.16	Ube2k	0.355646	122.46	156.695
ENSMUSG00000000399.10	Ndufa9	0.45316	122.335	167.481
ENSMUSG00000099913.1	Gm28551	-2.9699	122.299	15.6097
ENSMUSG00000016528.10	Mapkapk2	-0.362941	122.234	95.0463
ENSMUSG00000042750.7	Bex2	1.19181	122.195	279.141
ENSMUSG00000055639.16	Dach1	0.669213	122.052	194.088
ENSMUSG00000037242.8	Clic4	1.1894	122.021	278.279
ENSMUSG00000041264.16	Uspl1	-1.74132	122.007	36.4918
ENSMUSG00000020950.10	Foxg1	0.5316	121.892	176.199
ENSMUSG00000018042.18	Cyb5r3	0.645892	121.832	190.632
ENSMUSG00000016619.10	Nup50	0.0432364	121.761	125.465
ENSMUSG00000032525.15	Nktr	-1.62609	121.721	39.4334
ENSMUSG00000021076.6	Actr10	0.185099	121.679	138.337
ENSMUSG00000025278.9	Flnb	0.102431	121.615	130.564
ENSMUSG00000026843.15	Fubp3	-0.0290809	121.528	119.102
ENSMUSG00000041438.8	Utp4	-0.409948	121.178	91.2045
ENSMUSG00000026558.13	Uck2	0.460713	121.163	166.747
ENSMUSG00000021681.8	Aggf1	-1.95419	121.083	31.2474
ENSMUSG00000020808.3	Pimreg	0.106033	121.042	130.273
ENSMUSG00000062937.7	Mtap	0.238826	120.908	142.675
ENSMUSG00000036606.17	Plxnb2	-1.53277	120.857	41.7698
ENSMUSG00000022378.14	Fam49b	-0.777771	120.801	70.4594
ENSMUSG00000039220.16	Ppp1r10	-0.753456	120.795	71.6534
ENSMUSG00000078671.11	Chd2	-1.27966	120.744	49.7336
ENSMUSG00000028869.13	Gnl2	-0.099897	120.737	112.66
ENSMUSG00000037876.17	Jmjd1c	-1.25312	120.625	50.6069
ENSMUSG00000001964.14	Emd	0.407646	120.613	159.995
ENSMUSG00000048000.15	Gigyf2	-0.608462	120.607	79.1054
ENSMUSG00000026254.17	Eif4e2	-0.131592	120.585	110.073
ENSMUSG00000025255.18	Zfhx4	-1.19645	120.538	52.5966
ENSMUSG00000020257.13	Wdr82	0.88448	120.453	222.369
ENSMUSG00000041236.8	Vps41	-0.597678	120.418	79.5744
ENSMUSG00000025326.12	Ube3a	0.218592	120.355	140.045
ENSMUSG00000058070.14	Eml1	-0.546356	120.314	82.3847
ENSMUSG00000051329.13	Nup160	0.179193	120.29	136.199
ENSMUSG00000021938.12	Pspc1	1.16805	120.272	270.259
ENSMUSG00000033014.12	Trim33	-0.0910018	120.245	112.895
ENSMUSG00000024287.8	Thoc1	-0.453165	120.179	87.7833
ENSMUSG00000046572.10	Zfp518b	-0.764018	120.09	70.7154
ENSMUSG00000017999.16	Ddx27	-0.513591	119.916	83.9981
ENSMUSG00000015745.9	Plekho1	-1.15566	119.906	53.8212
ENSMUSG00000036270.16	Edc4	-0.13391	119.843	109.22
ENSMUSG00000027714.11	Exosc9	0.472685	119.756	166.184
ENSMUSG00000061360.8	Phf5a	-0.135853	119.743	108.982
ENSMUSG00000042487.6	Leo1	0.244097	119.71	141.779
ENSMUSG00000038335.13	Tsr1	-0.254748	119.702	100.326
ENSMUSG00000003269.17	Cyth2	-0.181353	119.582	105.457
ENSMUSG00000015748.13	Prpf3	-0.45533	119.319	87.0248
ENSMUSG00000026260.12	Ndufa10	0.281352	119.319	145.012
ENSMUSG00000017861.11	Mybl2	-1.11554	119.29	55.0545
ENSMUSG00000020697.16	Lig3	-0.495715	119.24	84.5661
ENSMUSG00000038084.16	Opa1	-0.295928	119.208	97.1003
ENSMUSG00000030726.16	Pold3	-0.85947	119.166	65.6788
ENSMUSG00000070697.4	Utp3	0.281861	119.115	144.816
ENSMUSG00000037361.8	Sf3b6	0.285473	119.109	145.171
ENSMUSG00000030204.10	Ddx47	0.330655	118.993	149.644
ENSMUSG00000038299.16	Wdr36	-0.0907122	118.958	111.708
ENSMUSG00000030619.9	Eed	-0.793536	118.915	68.6057
ENSMUSG00000060657.8	Marf1	-1.74593	118.751	35.4045
ENSMUSG00000033392.16	Clasp2	-0.70701	118.579	72.6401
ENSMUSG00000000142.15	Axin2	-1.29959	118.446	48.1178
ENSMUSG00000025234.11	Arih1	0.167637	118.426	133.018
ENSMUSG00000024976.14	Shoc2	-0.545792	118.202	80.9704
ENSMUSG00000049878.13	Rlf	-0.865837	118.196	64.8573
ENSMUSG00000020022.17	Ndufa12	0.142417	118.12	130.375
ENSMUSG00000028478.18	Clta	0.954205	118.115	228.848
ENSMUSG00000027248.13	Pdia3	0.113149	118.083	127.717
ENSMUSG00000029701.15	Rbm28	-0.275652	117.928	97.4172
ENSMUSG00000037725.8	Ckap2	-0.247707	117.881	99.2836
ENSMUSG00000057388.9	Mrpl18	-1.81001	117.851	33.6098
ENSMUSG00000040250.14	Ints13	-0.901776	117.702	62.9974
ENSMUSG00000035941.15	Ibtk	-1.99619	117.641	29.4879
ENSMUSG00000041773.8	Enc1	0.241508	117.597	139.026
ENSMUSG00000011877.13	Git1	-1.25898	117.548	49.1164
ENSMUSG00000032621.8	Srek1	-0.364966	117.534	91.2639
ENSMUSG00000028771.13	Ptpn12	-0.752796	117.527	69.7467
ENSMUSG00000025995.16	Wdr75	-0.236401	117.515	99.754
ENSMUSG00000041642.18	Kif21b	-1.08444	117.509	55.4144
ENSMUSG00000033257.14	Ttll4	-0.744255	117.487	70.1366
ENSMUSG00000001767.5	Crnkl1	0.0582083	117.278	122.106
ENSMUSG00000038056.15	Kmt2c	-1.51466	117.259	41.0382
ENSMUSG00000006456.10	Rbm14	0.465089	117.145	161.707
ENSMUSG00000022771.17	Ppil2	-0.352399	116.956	91.6096
ENSMUSG00000039230.14	Tbcd	-0.404817	116.932	88.3228
ENSMUSG00000040688.16	Tbl3	0.263426	116.928	140.352
ENSMUSG00000032867.8	Fbxw8	0.220989	116.863	136.207
ENSMUSG00000002658.9	Gtf2f1	-0.422362	116.844	87.1892
ENSMUSG00000028603.15	Scp2	-0.338913	116.759	92.3136
ENSMUSG00000000346.9	Dazap2	-0.590977	116.424	77.2931
ENSMUSG00000035623.14	Rsf1	-0.17192	116.352	103.281
ENSMUSG00000006276.10	Eps15l1	-0.523031	116.322	80.9496
ENSMUSG00000026669.14	Mcm10	-0.334591	116.322	92.2444
ENSMUSG00000024491.16	Rbm27	-0.740841	116.131	69.4919
ENSMUSG00000029577.13	Ube3b	-2.11348	116.13	26.8363
ENSMUSG00000027014.14	Cwc22	-1.56443	116.084	39.2493
ENSMUSG00000026064.16	Ptp4a1	-3.53979	116.05	9.97842
ENSMUSG00000071528.4	Atp5md	-0.011441	115.922	115.006
ENSMUSG00000051579.10	Tceal8	0.506516	115.836	164.559
ENSMUSG00000052738.14	Suclg1	0.418432	115.811	154.779
ENSMUSG00000024429.9	Gnl1	-0.796036	115.789	66.6864
ENSMUSG00000027406.12	Idh3b	0.340263	115.702	146.477
ENSMUSG00000022477.13	Aco2	-0.26047	115.691	96.5805
ENSMUSG00000049295.17	Zfp219	-0.604278	115.632	76.0629
ENSMUSG00000022774.13	Ncbp2	0.926851	115.526	219.629
ENSMUSG00000026923.15	Notch1	-1.17314	115.473	51.2071
ENSMUSG00000063576.12	Klhdc3	-1.69875	115.404	35.5505
ENSMUSG00000027331.15	Knstrn	0.14115	115.386	127.246
ENSMUSG00000001229.9	Dpp9	-0.988236	115.32	58.1322
ENSMUSG00000031601.16	Cnot7	-1.86969	115.318	31.5546
ENSMUSG00000031683.16	Lsm6	-1.04877	115.315	55.7412
ENSMUSG00000020124.10	Usp15	-0.364792	115.268	89.5149
ENSMUSG00000030816.8	Rnf40	-0.585061	115.24	76.8213
ENSMUSG00000039000.8	Ube3c	-1.39199	115.183	43.8891
ENSMUSG00000025555.14	Farp1	-0.986453	115.172	58.1294
ENSMUSG00000001785.13	Pwp1	0.497566	115.106	162.51
ENSMUSG00000006307.16	Kmt2b	-1.91826	115.002	30.4263
ENSMUSG00000017781.17	Pitpna	0.286451	114.958	140.207
ENSMUSG00000020982.9	Nemf	-0.538288	114.934	79.1421
ENSMUSG00000061689.15	Dlgap4	-0.459053	114.895	83.5816
ENSMUSG00000032898.9	Fbxo21	0.565323	114.86	169.96
ENSMUSG00000024833.15	Pola2	0.420151	114.478	153.18
ENSMUSG00000026926.14	Pmpca	0.5915	114.42	172.41
ENSMUSG00000024742.15	Fen1	0.292741	114.336	140.058
ENSMUSG00000052305.6	Hbb-bs	2.47955	114.285	637.392
ENSMUSG00000022322.8	Shcbp1	0.0706695	114.168	119.899
ENSMUSG00000024083.16	Pja2	0.09606	114.167	122.028
ENSMUSG00000030846.15	Tial1	-0.284029	114.157	93.7562
ENSMUSG00000042211.7	Fbxo38	-0.852947	114.117	63.181
ENSMUSG00000057133.14	Chd6	-1.69126	114.111	35.3351
ENSMUSG00000028568.16	Btf3l4	-0.357548	114.06	89.0228
ENSMUSG00000030774.13	Pak1	-0.451615	114.045	83.3928
ENSMUSG00000048922.18	Cdca2	-0.556678	113.992	77.4991
ENSMUSG00000079614.4	Seh1l	0.466706	113.966	157.495
ENSMUSG00000061130.13	Ppm1b	-1.07033	113.875	54.2282
ENSMUSG00000030180.15	Kdm5a	-0.669929	113.871	71.5724
ENSMUSG00000002844.9	Adprh	0.372239	113.851	147.365
ENSMUSG00000025035.9	Arl3	0.275195	113.814	137.733
ENSMUSG00000037640.15	Zfp60	-0.663123	113.804	71.8682
ENSMUSG00000069171.14	Nr2f1	-0.0535598	113.684	109.541
ENSMUSG00000029267.17	Mtf2	-0.815897	113.565	64.5112
ENSMUSG00000004937.6	Sgta	0.62045	113.521	174.522
ENSMUSG00000045598.10	Zfp553	-1.06333	113.509	54.317
ENSMUSG00000056234.15	Ncoa4	-0.828189	113.484	63.9183
ENSMUSG00000010376.15	Nedd8	1.45725	113.336	311.201
ENSMUSG00000032446.14	Eomes	-0.497651	113.319	80.2593
ENSMUSG00000063810.7	Alms1	-1.13578	113.245	51.5363
ENSMUSG00000091896.8	Ube2d2a	-0.579974	113.157	75.6995
ENSMUSG00000034152.6	Exoc3	0.132196	113.039	123.886
ENSMUSG00000004895.9	Prcc	-0.409176	112.997	85.093
ENSMUSG00000033444.14	Specc1l	-0.447749	112.914	82.7867
ENSMUSG00000006715.11	Gmnn	0.784177	112.909	194.442
ENSMUSG00000032314.14	Etfa	0.2642	112.873	135.557
ENSMUSG00000035437.15	Rabgap1	-0.199316	112.488	97.973
ENSMUSG00000039231.18	Suv39h1	-0.42988	112.351	83.4008
ENSMUSG00000002319.16	Ipo4	0.0320724	112.323	114.848
ENSMUSG00000015961.8	Adss	0.595067	112.321	169.665
ENSMUSG00000021366.8	Hivep1	-3.32941	112.3	11.1719
ENSMUSG00000014601.13	Strip1	-0.0172554	112.193	110.86
ENSMUSG00000037519.17	Ppfia1	-0.628827	112.149	72.5269
ENSMUSG00000024091.9	Vapa	1.06013	112.061	233.662
ENSMUSG00000039756.12	Dnttip2	-0.142255	112.023	101.504
ENSMUSG00000022051.15	Bnip3l	-0.727023	112.005	67.6679
ENSMUSG00000020580.10	Rock2	-0.860261	111.984	61.6868
ENSMUSG00000000838.17	Fmr1	-0.400361	111.947	84.8184
ENSMUSG00000045333.15	Zfp423	-0.99238	111.921	56.2566
ENSMUSG00000009090.17	Ap1b1	0.430373	111.911	150.809
ENSMUSG00000078974.10	Sec61g	-1.12798	111.695	51.1065
ENSMUSG00000000628.10	Hk2	0.576831	111.224	165.899
ENSMUSG00000031093.14	Dock11	-0.829151	111.163	62.5694
ENSMUSG00000050017.11	Pitpnb	0.724836	111.139	183.68
ENSMUSG00000031839.7	Hsbp1	0.994545	111.081	221.323
ENSMUSG00000036678.8	Aaas	-0.0841333	111.046	104.755
ENSMUSG00000034832.15	Tet3	-1.17457	111.016	49.1819
ENSMUSG00000019854.17	Reps1	-1.04754	110.895	53.6505
ENSMUSG00000001151.10	Pcnt	-1.08937	110.89	52.1149
ENSMUSG00000033475.15	Tomm6	0.977454	110.879	218.32
ENSMUSG00000000561.14	Wdr77	0.627834	110.818	171.24
ENSMUSG00000036990.13	Otud4	-0.658678	110.79	70.1806
ENSMUSG00000112449.1	Srp54b	0.0402	110.783	113.913
ENSMUSG00000004665.10	Cnn2	0.608228	110.757	168.837
ENSMUSG00000017146.12	Brca1	-0.896963	110.559	59.3717
ENSMUSG00000027598.16	Itch	-0.672817	110.543	69.3412
ENSMUSG00000018481.9	Appbp2	0.161649	110.477	123.576
ENSMUSG00000051166.10	Eml5	-2.19905	110.453	24.0545
ENSMUSG00000078515.4	Ddi2	-0.614212	110.394	72.1187
ENSMUSG00000026275.13	Ppp1r7	1.14239	110.387	243.676
ENSMUSG00000025609.15	Mkln1	0.437532	110.377	149.482
ENSMUSG00000027323.10	Rad51	-0.160113	110.36	98.7675
ENSMUSG00000035027.18	Map2k2	-0.00585841	110.321	109.874
ENSMUSG00000005899.14	Smpd4	-0.963509	110.241	56.5325
ENSMUSG00000108815.1	Gm49388	-1.38579	110.192	42.1681
ENSMUSG00000031827.13	Cotl1	0.749987	110.187	185.31
ENSMUSG00000019338.13	Zfp687	-1.20251	110.055	47.821
ENSMUSG00000019843.14	Fyn	-0.909596	110.015	58.5647
ENSMUSG00000027363.15	Usp8	-1.19106	109.974	48.1663
ENSMUSG00000021810.3	Ecd	-0.143298	109.883	99.4935
ENSMUSG00000036097.8	Slf2	-1.35018	109.836	43.0824
ENSMUSG00000029407.10	Uso1	-0.122555	109.724	100.788
ENSMUSG00000030811.14	Fbxl19	-1.65218	109.693	34.8998
ENSMUSG00000039473.8	Ubn1	-1.64131	109.686	35.1615
ENSMUSG00000016831.12	Tox4	-0.649923	109.678	69.8996
ENSMUSG00000025272.16	Tro	-1.37803	109.65	42.1872
ENSMUSG00000030872.14	Gga2	0.0836106	109.559	116.096
ENSMUSG00000022551.8	Cyc1	0.403243	109.29	144.533
ENSMUSG00000005981.11	Trap1	0.0278812	109.255	111.387
ENSMUSG00000043411.15	Usp48	-0.396902	109.199	82.9353
ENSMUSG00000025626.16	Phf6	0.645934	109.155	170.8
ENSMUSG00000015709.9	Arnt2	-0.160548	109.144	97.6494
ENSMUSG00000028032.13	Papss1	-0.0337621	109.134	106.609
ENSMUSG00000008200.14	Fnbp4	-0.755799	109.093	64.6068
ENSMUSG00000003068.16	Stk11	-2.20133	109.092	23.7206
ENSMUSG00000042744.16	Hectd4	-1.12002	109.06	50.1774
ENSMUSG00000023079.14	Gtf2ird1	-1.27111	109.009	45.1668
ENSMUSG00000027176.8	Cstf3	0.120065	108.987	118.445
ENSMUSG00000020186.7	Csrp2	0.503627	108.976	154.504
ENSMUSG00000003037.16	Rab8a	0.24673	108.961	129.284
ENSMUSG00000035248.9	Tut7	-1.46238	108.869	39.508
ENSMUSG00000078676.9	Casc3	-0.166842	108.827	96.9423
ENSMUSG00000051220.2	Ercc6l	-0.305834	108.689	87.9266
ENSMUSG00000022814.6	Umps	0.347976	108.673	138.316
ENSMUSG00000020844.6	Nxn	0.363533	108.642	139.776
ENSMUSG00000060098.11	Prmt7	-0.621504	108.609	70.5954
ENSMUSG00000022043.19	Trim35	0.854106	108.57	196.255
ENSMUSG00000020483.14	Dynll2	0.703694	108.554	176.798
ENSMUSG00000061559.15	Wdr61	0.346001	108.509	137.919
[truncated: 20,404 more rows]

## Sheet: transcripts in 6B
RGCs		IPs		Deep layer		Superficial
	gene name		gene name		gene name		gene name
ENSMUSG00000074637.7	Sox2	ENSMUSG00000027967.8	Neurog2	ENSMUSG00000030123.15	Plxnd1	ENSMUSG00000000247.11	Lhx2
ENSMUSG00000027168.21	Pax6	ENSMUSG00000032446.14	Eomes	ENSMUSG00000035033.15	Tbr1	ENSMUSG00000029705.17	Cux1
ENSMUSG00000004891.16	Nes	ENSMUSG00000021453.2	Gadd45g	ENSMUSG00000024642.17	Tle4	ENSMUSG00000038331.15	Satb2
ENSMUSG00000026728.9	Vim	ENSMUSG00000002107.18	Celf2	ENSMUSG00000048251.15	Bcl11b	ENSMUSG00000032280.16	Tle3
ENSMUSG00000021379.2	Id4	ENSMUSG00000008489.18	Elavl2	ENSMUSG00000095139.2	Pou3f2	ENSMUSG00000008305.18	Tle1
ENSMUSG00000048001.7	Hes5	ENSMUSG00000020423.6	Btg2	ENSMUSG00000047786.12	Lix1	ENSMUSG00000039982.8	Dtx4
ENSMUSG00000022528.8	Hes1	ENSMUSG00000068154.5	Insm1	ENSMUSG00000041959.14	S100a10	ENSMUSG00000042589.18	Cux2
ENSMUSG00000061524.8	Zic2	ENSMUSG00000067071.8	Hes6	ENSMUSG00000030905.5	Crym	ENSMUSG00000042671.12	Rgs8
ENSMUSG00000033726.8	Emx1	ENSMUSG00000018169.12	Mfng	ENSMUSG00000005917.15	Otx1	ENSMUSG00000026826.13	Nr4a2
ENSMUSG00000043969.4	Emx2	ENSMUSG00000038034.15	Igsf8	ENSMUSG00000021743.6	Fezf2
ENSMUSG00000019874.11	Fabp7			ENSMUSG00000017493.12	Igfbp4
				ENSMUSG00000041540.16	Sox5
				ENSMUSG00000047557.2	Lxn
				ENSMUSG00000029563.16	Foxp2
				ENSMUSG00000020644.9	Id2
				ENSMUSG00000028266.17	Lmo4
